# Supplementary material for: Telomere-Associated Changes in Nuclear Architecture of Cancer-Associated Macrophage-like Cells in Liquid Biopsies from Melanoma Patients
Source: MDPI journal article supplement (doi:10.3390/biomedicines10102391), 2022-09-25
Supplement: s1 [file s1]

***The GLM Procedure*****pt=16AA2042**

| Class Level Information |        |                 |
|-------------------------|--------|-----------------|
| Class                   | Levels | Values          |
| type                    | 3      | CTCs Lymph Macr |

|                             |    |
|-----------------------------|----|
| Number of Observations Read | 63 |
| Number of Observations Used | 63 |

**The GLM Procedure**

**Dependent Variable: Totalnofsignals**  
**Totalnofsignals**

**pt=16AA2042**

| Source                 | DF | Sum of Squares | Mean Square | F Value | Pr > F |
|------------------------|----|----------------|-------------|---------|--------|
| <b>Model</b>           | 2  | 21976.04339    | 10988.02169 | 10.60   | 0.0001 |
| <b>Error</b>           | 60 | 62171.60741    | 1036.19346  |         |        |
| <b>Corrected Total</b> | 62 | 84147.65079    |             |         |        |

| R-Square | Coeff Var | Root MSE | Totalnofsignals Mean |
|----------|-----------|----------|----------------------|
| 0.261161 | 79.84124  | 32.18996 | 40.31746             |

| Source      | DF | Type III SS | Mean Square | F Value | Pr > F |
|-------------|----|-------------|-------------|---------|--------|
| <b>type</b> | 2  | 21976.04339 | 10988.02169 | 10.60   | 0.0001 |

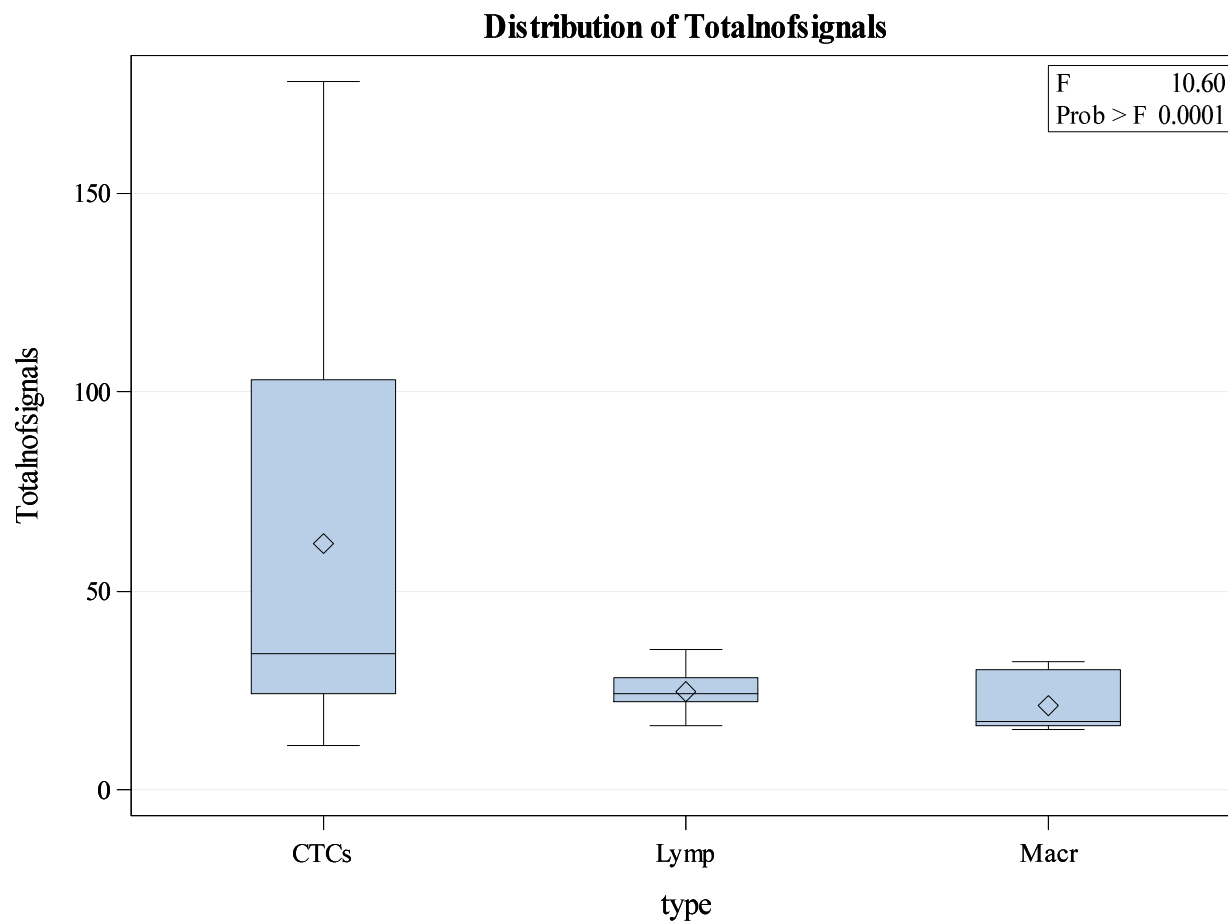

**The GLM Procedure****Dependent Variable: Totalnofaggregates Totalnofaggregates****pt=16AA2042**

| Source          | DF | Sum of Squares | Mean Square | F Value | Pr > F |
|-----------------|----|----------------|-------------|---------|--------|
| Model           | 2  | 321.765608     | 160.882804  | 6.98    | 0.0019 |
| Error           | 60 | 1383.218519    | 23.053642   |         |        |
| Corrected Total | 62 | 1704.984127    |             |         |        |

| R-Square | Coeff Var | Root MSE | Totalnofaggregates Mean |
|----------|-----------|----------|-------------------------|
| 0.188721 | 120.5137  | 4.801421 | 3.984127                |

| Source | DF | Type III SS | Mean Square | F Value | Pr > F |
|--------|----|-------------|-------------|---------|--------|
| type   | 2  | 321.7656085 | 160.8828042 | 6.98    | 0.0019 |

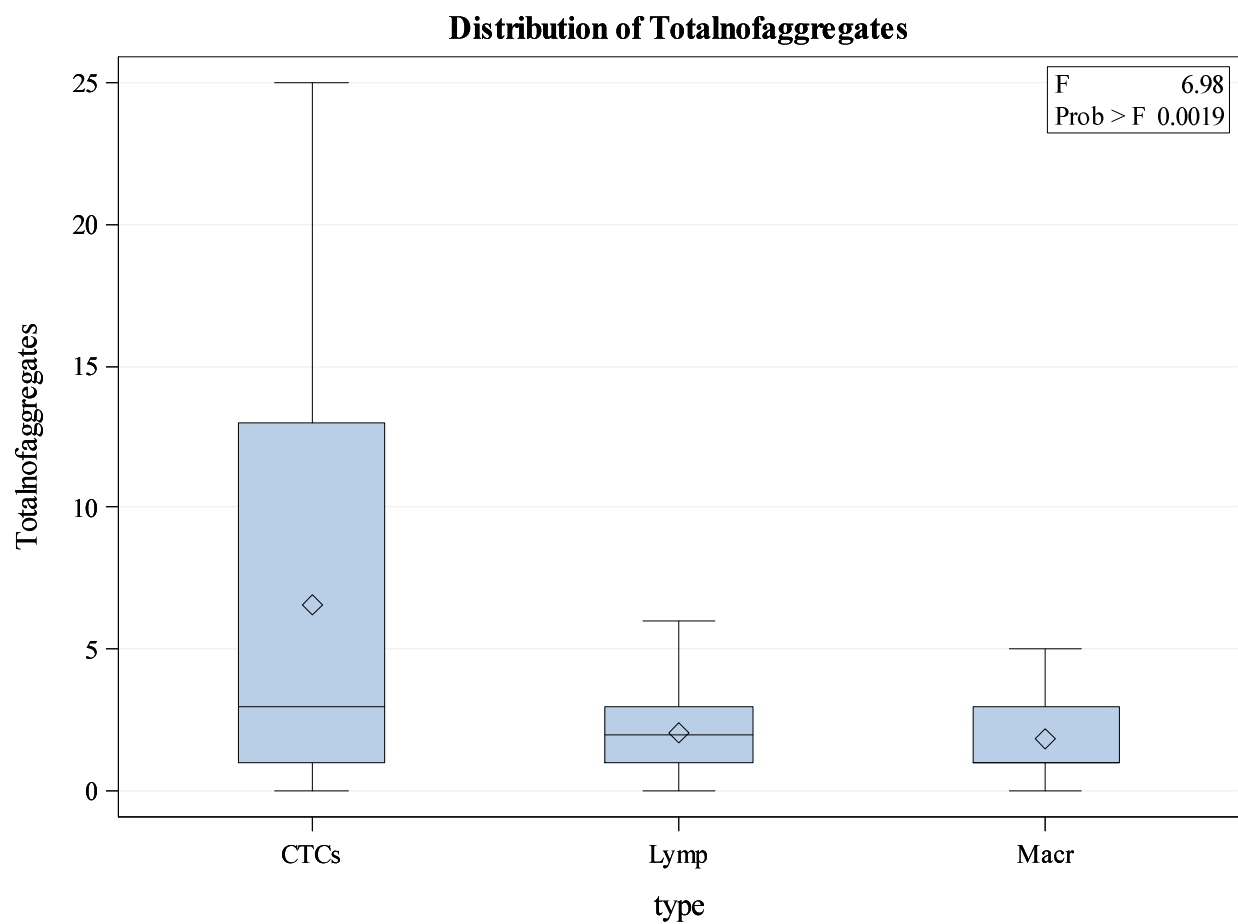

**The GLM Procedure**

**Dependent Variable: acratio**  
**acratio**

**pt=16AA2042**

| Source                 | DF | Sum of Squares | Mean Square | F Value | Pr > F |
|------------------------|----|----------------|-------------|---------|--------|
| <b>Model</b>           | 2  | 26.3361139     | 13.1680569  | 3.67    | 0.0314 |
| <b>Error</b>           | 60 | 215.3564603    | 3.5892743   |         |        |
| <b>Corrected Total</b> | 62 | 241.6925742    |             |         |        |

| R-Square | Coeff Var | Root MSE | acratio Mean |
|----------|-----------|----------|--------------|
| 0.108965 | 95.61216  | 1.894538 | 1.981482     |

| Source      | DF | Type III SS | Mean Square | F Value | Pr > F |
|-------------|----|-------------|-------------|---------|--------|
| <b>type</b> | 2  | 26.33611385 | 13.16805693 | 3.67    | 0.0314 |

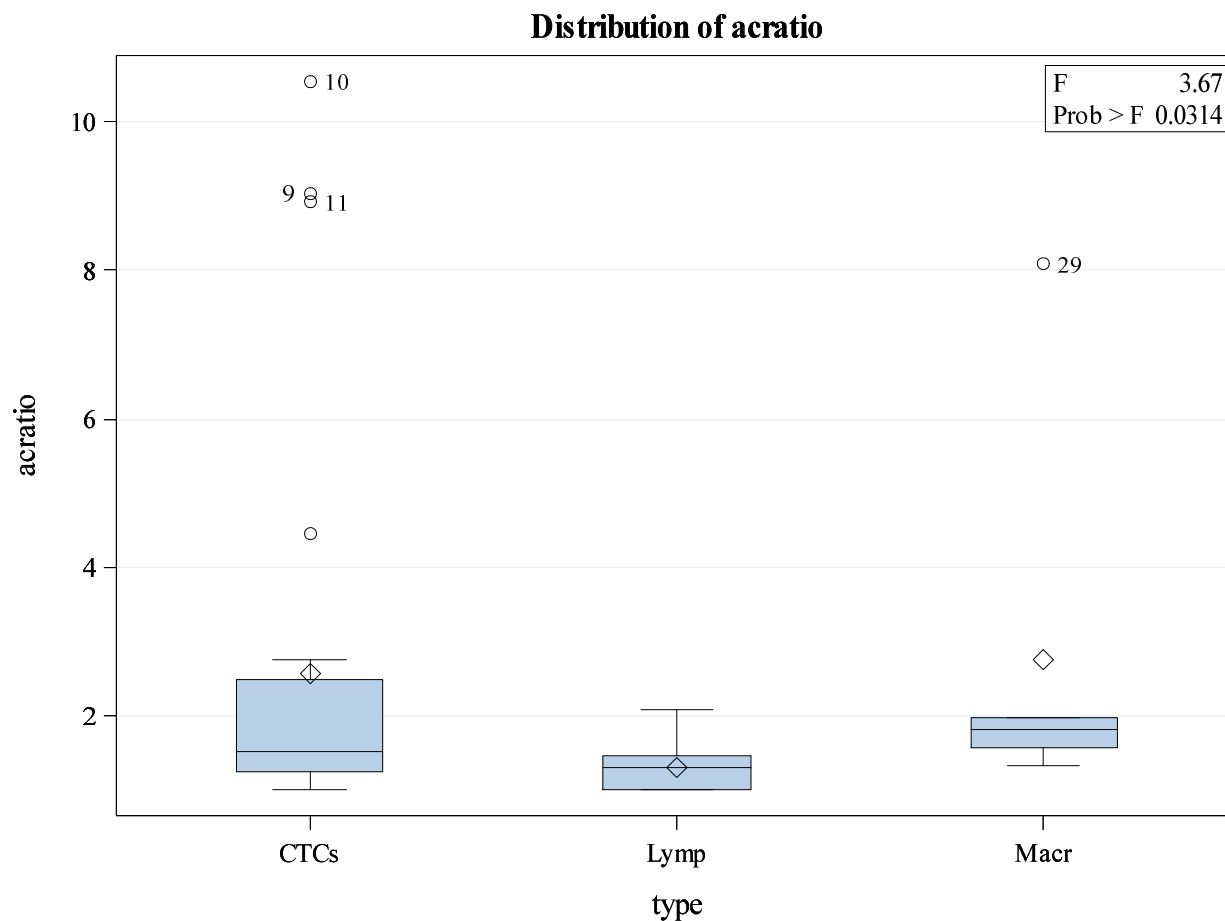

**The GLM Procedure**

**Dependent Variable: AvIntallsignals**  
**AvIntallsignals**

**pt=16AA2042**

| Source                 | DF | Sum of Squares | Mean Square | F Value | Pr > F |
|------------------------|----|----------------|-------------|---------|--------|
| <b>Model</b>           | 2  | 3008134963     | 1504067482  | 75.85   | <.0001 |
| <b>Error</b>           | 60 | 1189717370     | 19828623    |         |        |
| <b>Corrected Total</b> | 62 | 4197852333     |             |         |        |

| R-Square | Coeff Var | Root MSE | AvIntallsignals Mean |
|----------|-----------|----------|----------------------|
| 0.716589 | 24.05866  | 4452.934 | 18508.65             |

| Source      | DF | Type III SS | Mean Square | F Value | Pr > F |
|-------------|----|-------------|-------------|---------|--------|
| <b>type</b> | 2  | 3008134963  | 1504067482  | 75.85   | <.0001 |

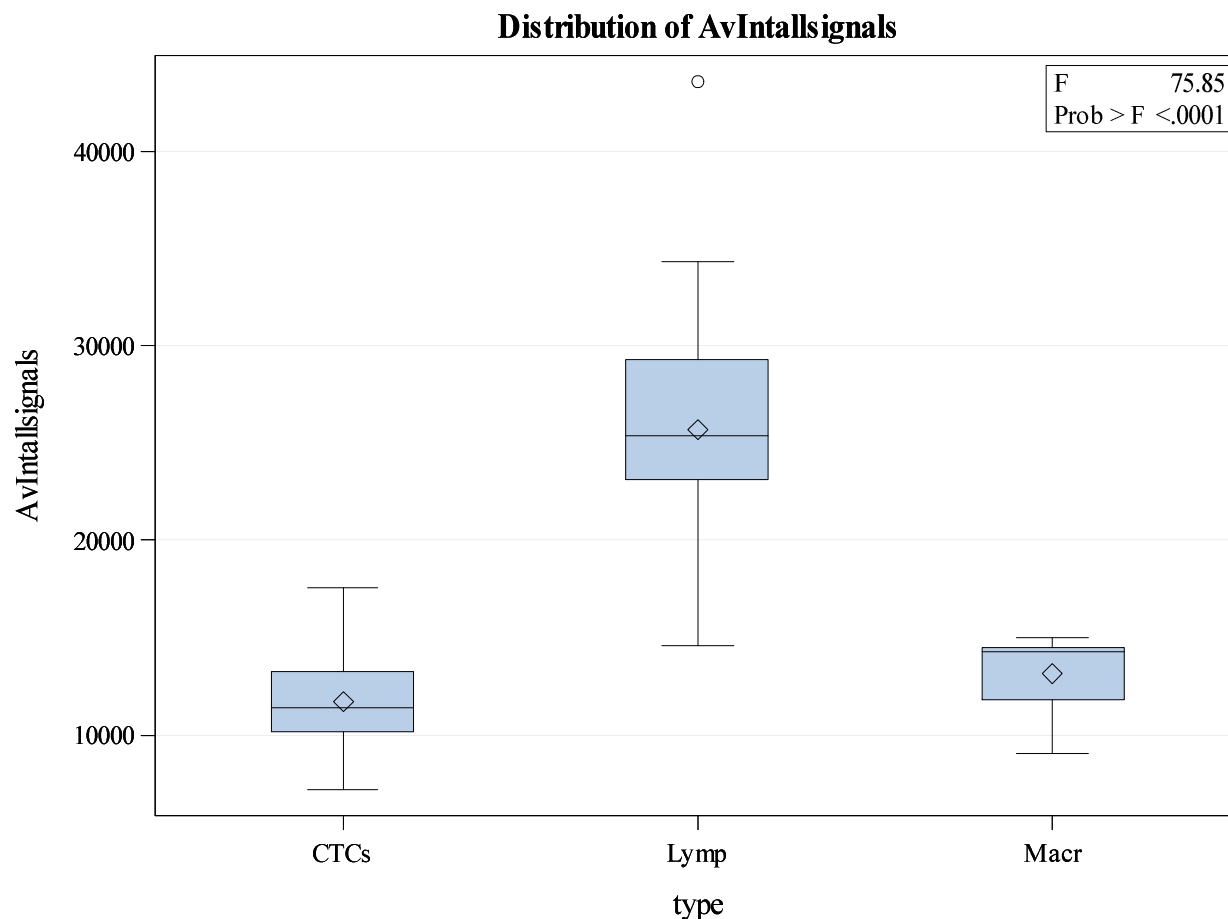

**The GLM Procedure**

**Dependent Variable: Totalintensity**  
**Totalintensity**

**pt=16AA2042**

| Source                 | DF | Sum of Squares | Mean Square  | F Value | Pr > F |
|------------------------|----|----------------|--------------|---------|--------|
| <b>Model</b>           | 2  | 798667878172   | 399333939086 | 4.15    | 0.0206 |
| <b>Error</b>           | 60 | 5.7771163E12   | 96285271503  |         |        |
| <b>Corrected Total</b> | 62 | 6.5757842E12   |              |         |        |

| R-Square | Coeff Var | Root MSE | Totalintensity Mean |
|----------|-----------|----------|---------------------|
| 0.121456 | 50.98279  | 310298.7 | 608634.1            |

| Source      | DF | Type III SS  | Mean Square  | F Value | Pr > F |
|-------------|----|--------------|--------------|---------|--------|
| <b>type</b> | 2  | 798667878172 | 399333939086 | 4.15    | 0.0206 |

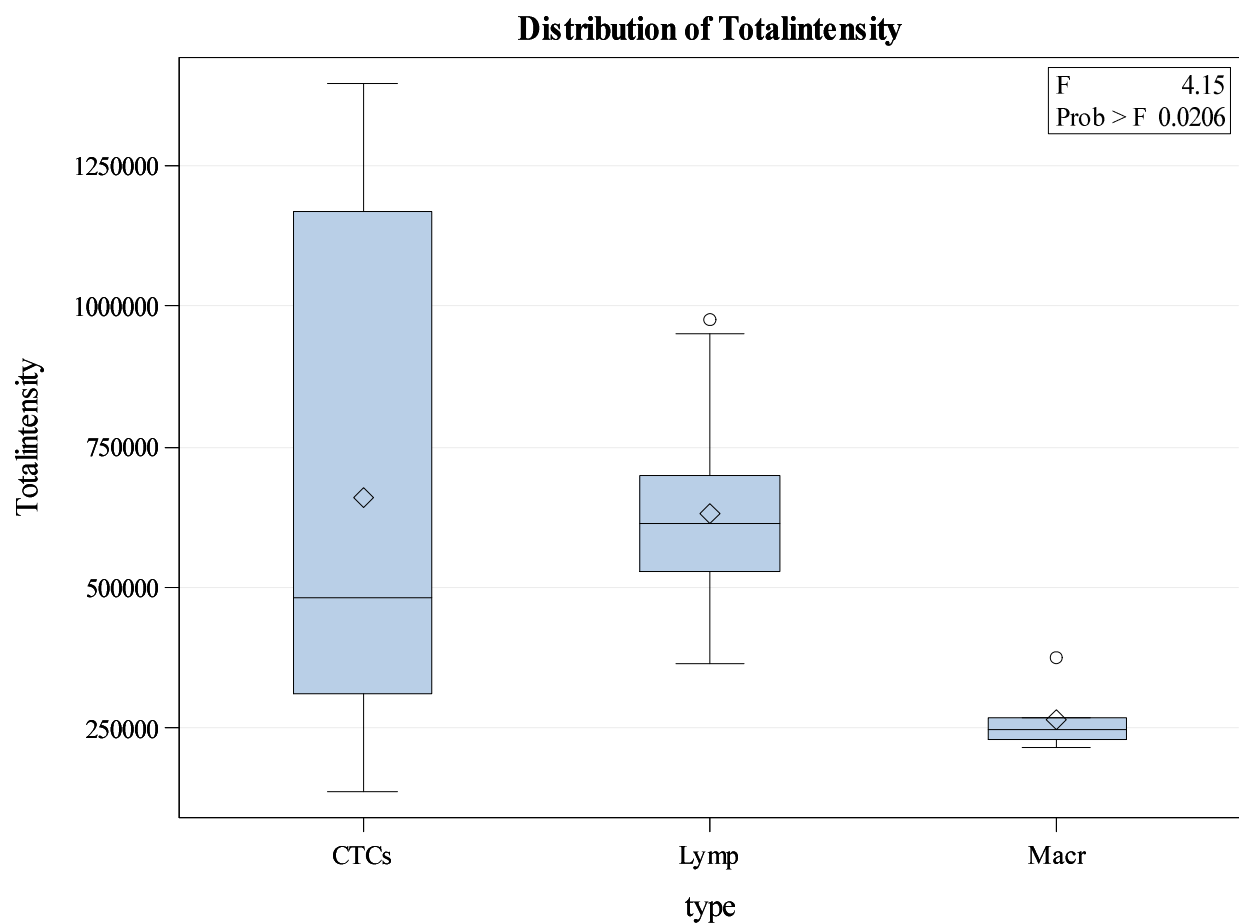

**The GLM Procedure**

**Dependent Variable: Nuclearvolume**  
**Nuclearvolume**

pt=16AA2042

| Source                 | DF | Sum of Squares | Mean Square  | F Value | Pr > F |
|------------------------|----|----------------|--------------|---------|--------|
| <b>Model</b>           | 2  | 6.7641002E12   | 3.3820501E12 | 28.45   | <.0001 |
| <b>Error</b>           | 60 | 7.1321231E12   | 118868718736 |         |        |
| <b>Corrected Total</b> | 62 | 1.3896223E13   |              |         |        |

| R-Square | Coeff Var | Root MSE | Nuclearvolume Mean |
|----------|-----------|----------|--------------------|
| 0.486758 | 69.98856  | 344773.4 | 492614.0           |

| Source      | DF | Type III SS  | Mean Square  | F Value | Pr > F |
|-------------|----|--------------|--------------|---------|--------|
| <b>type</b> | 2  | 6.7641002E12 | 3.3820501E12 | 28.45   | <.0001 |

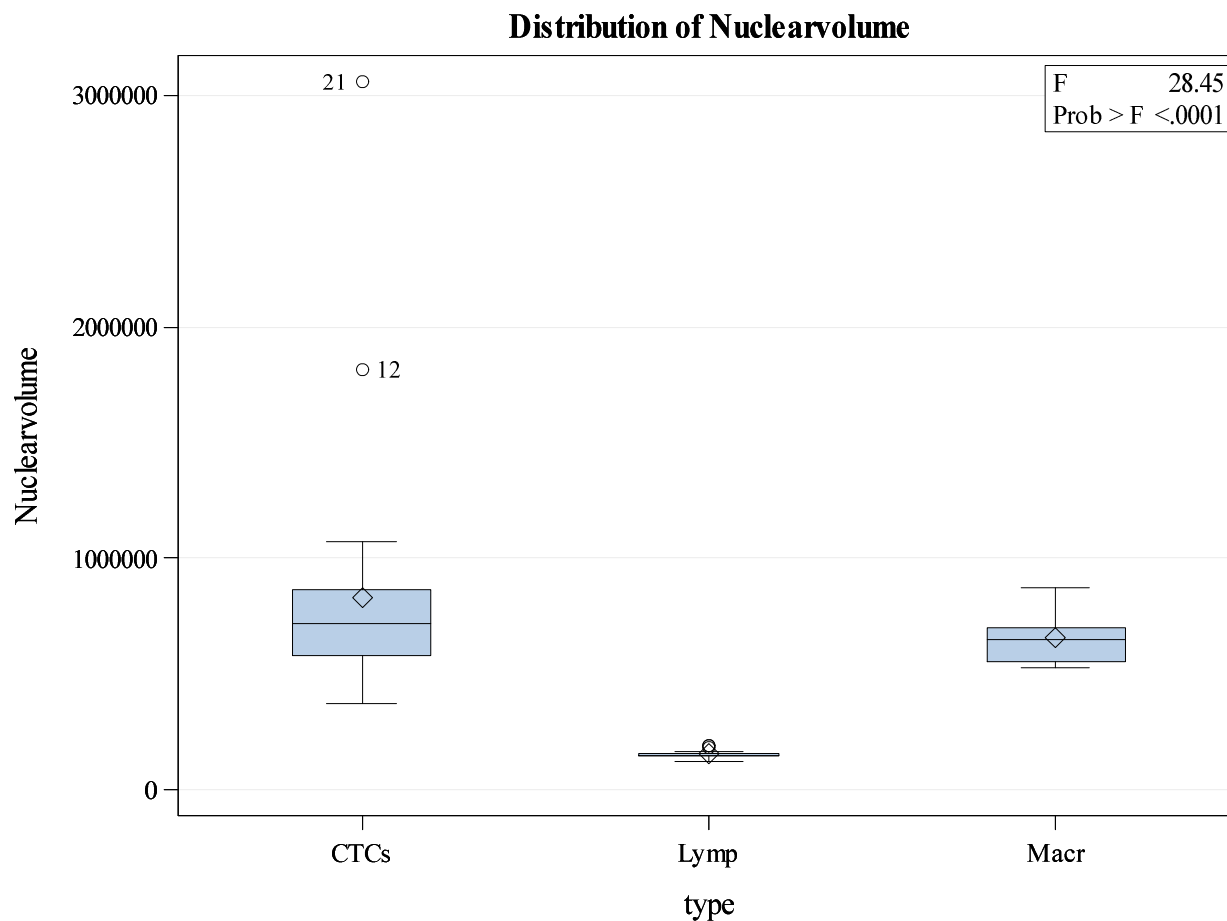

**The GLM Procedure****Dependent Variable: telomereperkvol****pt=16AA2042**

| Source                 | DF | Sum of Squares | Mean Square | F Value | Pr > F |
|------------------------|----|----------------|-------------|---------|--------|
| <b>Model</b>           | 2  | 0.14677950     | 0.07338975  | 46.15   | <.0001 |
| <b>Error</b>           | 60 | 0.09541443     | 0.00159024  |         |        |
| <b>Corrected Total</b> | 62 | 0.24219393     |             |         |        |

| R-Square | Coeff Var | Root MSE | telomereperkvol Mean |
|----------|-----------|----------|----------------------|
| 0.606041 | 35.16967  | 0.039878 | 0.113387             |

| Source      | DF | Type III SS | Mean Square | F Value | Pr > F |
|-------------|----|-------------|-------------|---------|--------|
| <b>type</b> | 2  | 0.14677950  | 0.07338975  | 46.15   | <.0001 |

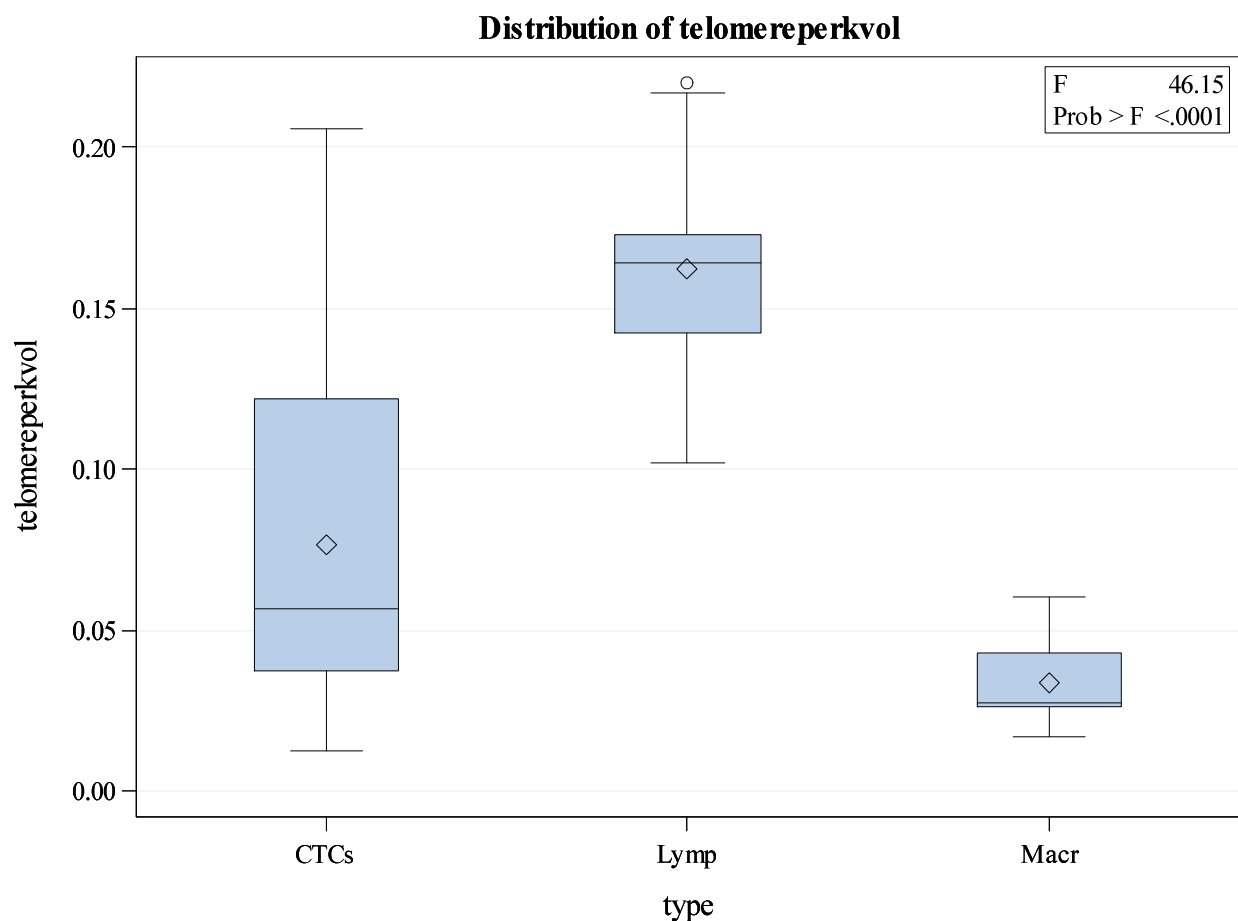



**The GLM Procedure**  
**Least Squares Means**

**pt=16AA2042**

| type        | Totalnofsignals<br>LSMEAN | Standard<br>Error | Pr >  t | LSMEAN<br>Number |
|-------------|---------------------------|-------------------|---------|------------------|
| <b>CTCs</b> | 61.8518519                | 6.1949605         | <.0001  | 1                |
| <b>Lymp</b> | 24.7666667                | 5.8770555         | <.0001  | 2                |
| <b>Macr</b> | 21.1666667                | 13.1414957        | 0.1125  | 3                |

| Least Squares Means for effect type<br>Pr >  t  for H0: LSMean(i)=LSMean(j) |        |        |        |
|-----------------------------------------------------------------------------|--------|--------|--------|
| Dependent Variable: Totalnofsignals                                         |        |        |        |
| i/j                                                                         | 1      | 2      | 3      |
| 1                                                                           |        | <.0001 | 0.0069 |
| 2                                                                           | <.0001 |        | 0.8034 |
| 3                                                                           | 0.0069 | 0.8034 |        |

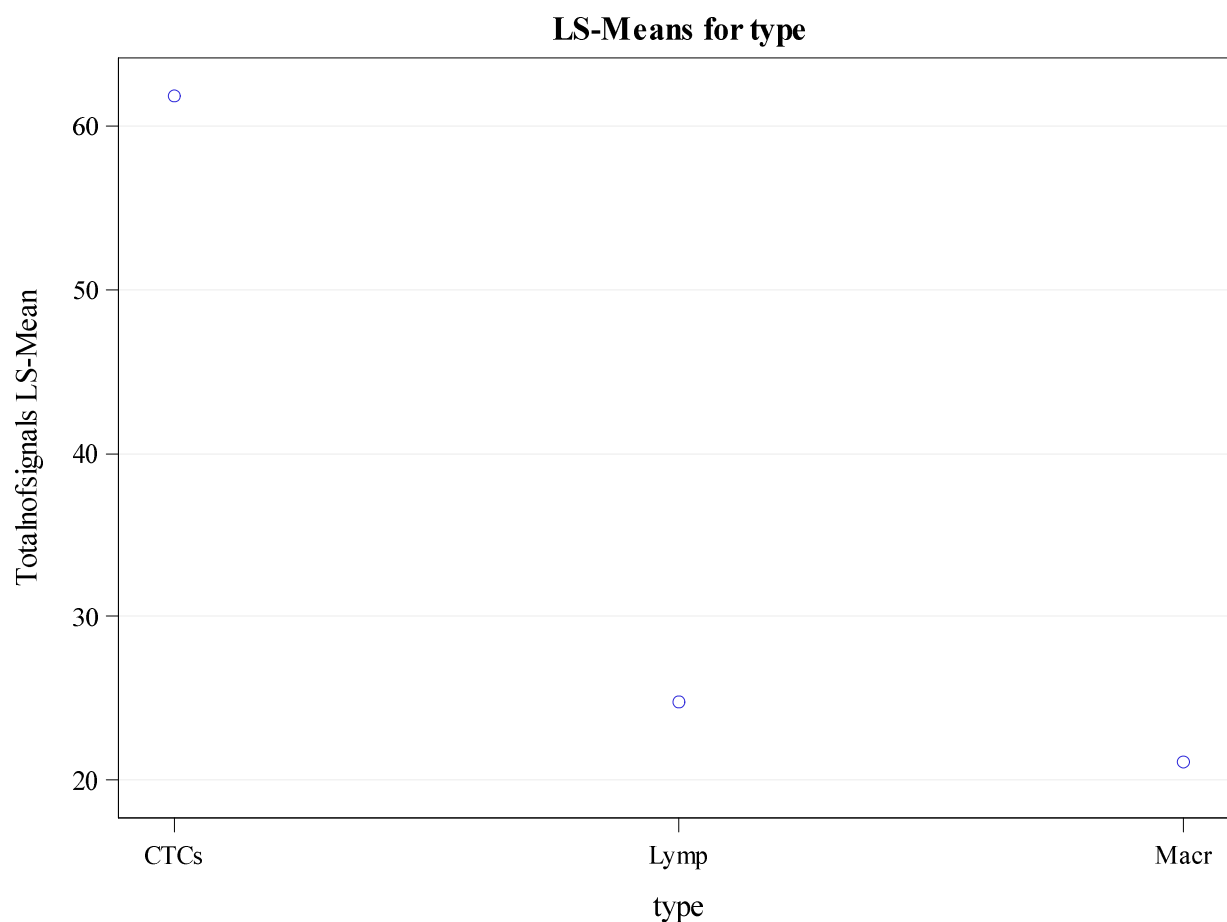

*The GLM Procedure*  
*Least Squares Means*

pt=16AA2042

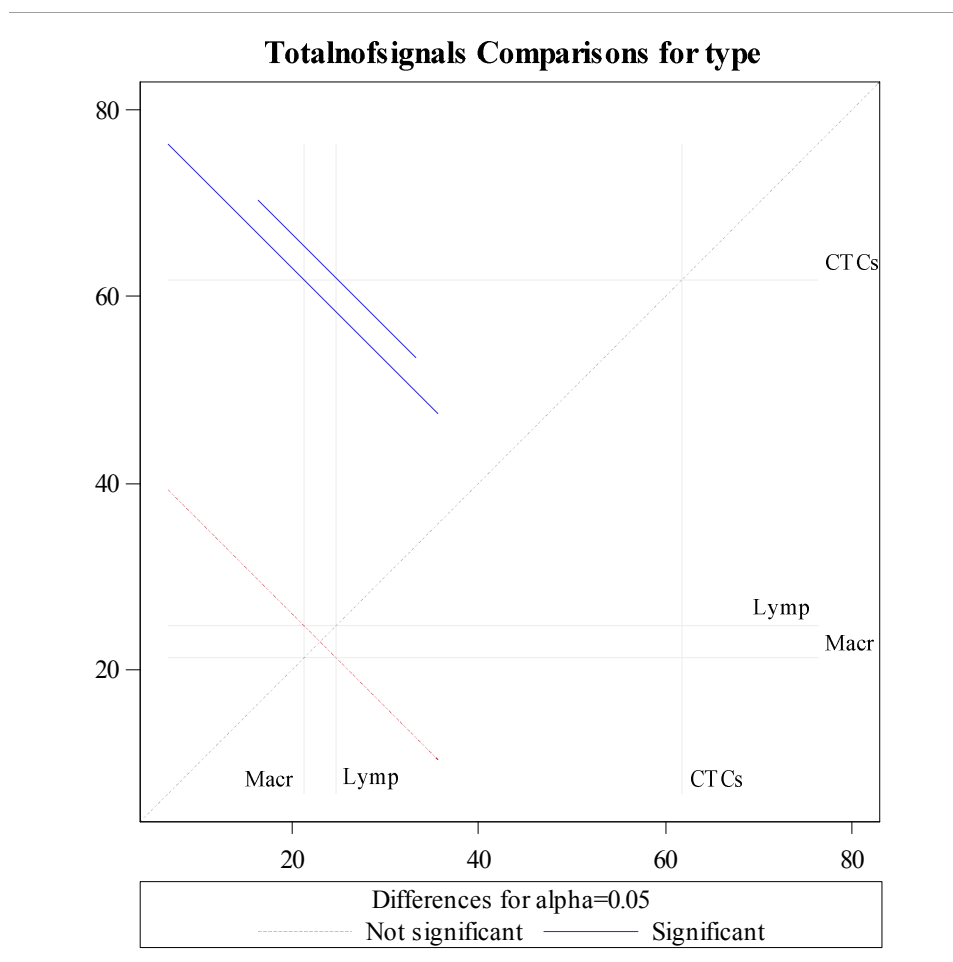

| type        | Totalnofaggregates<br>LSMEAN | Standard<br>Error | Pr >  t | LSMEAN<br>Number |
|-------------|------------------------------|-------------------|---------|------------------|
| <b>CTCs</b> | 6.59259259                   | 0.92403387        | <.0001  | 1                |
| <b>Lymp</b> | 2.06666667                   | 0.87661550        | 0.0217  | 2                |
| <b>Macr</b> | 1.83333333                   | 1.96017185        | 0.3534  | 3                |

*The GLM Procedure*  
*Least Squares Means*

pt=16AA2042

| Least Squares Means for effect type    |        |        |        |
|----------------------------------------|--------|--------|--------|
| Pr >  t  for H0: LSMean(i)=LSMean(j)   |        |        |        |
| Dependent Variable: Totalnofaggregates |        |        |        |
| i/j                                    | 1      | 2      | 3      |
| 1                                      |        | 0.0007 | 0.0320 |
| 2                                      | 0.0007 |        | 0.9138 |
| 3                                      | 0.0320 | 0.9138 |        |

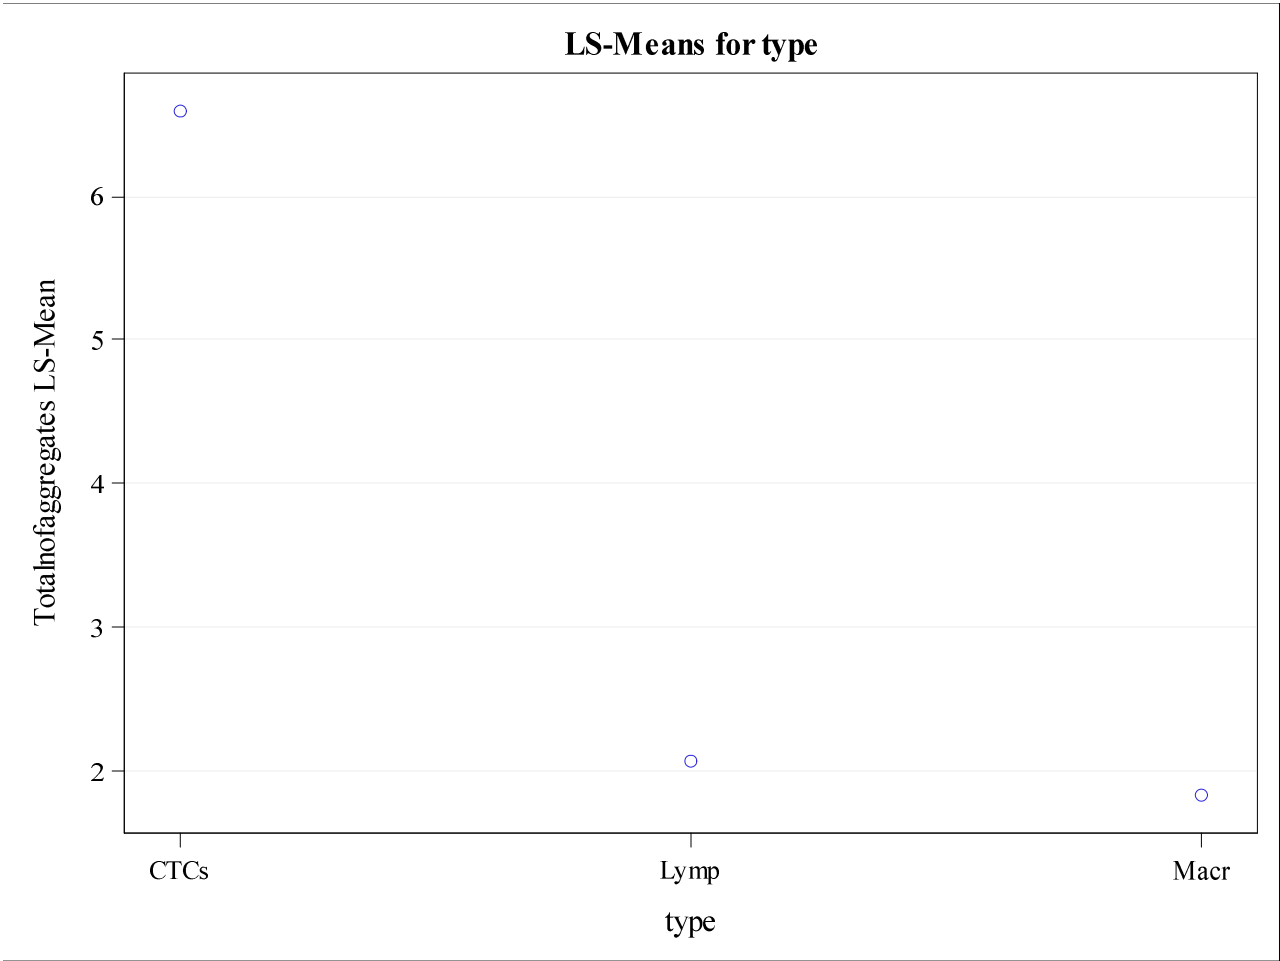

**The GLM Procedure**  
**Least Squares Means**

pt=16AA2042

**Totalnofaggregates Comparisons for type**

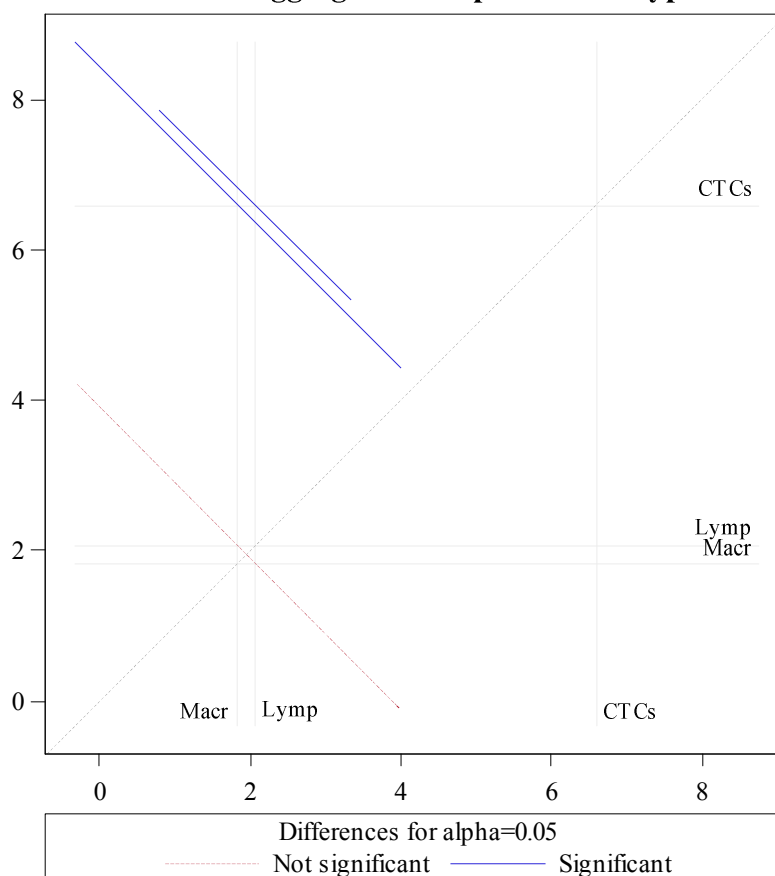

| type  | acratio<br>LSMEAN | Standard<br>Error | Pr >  t | LSMEAN<br>Number |
|-------|-------------------|-------------------|---------|------------------|
| CTCs  | 2.55897828        | 0.36460401        | <.0001  | 1                |
| L ymp | 1.30594016        | 0.34589374        | 0.0004  | 2                |
| Macr  | 2.76046183        | 0.77344191        | 0.0007  | 3                |

| Least Squares Means for effect type<br>Pr >  t  for H0: LSMean(i)=LSMean(j) |        |        |        |
|-----------------------------------------------------------------------------|--------|--------|--------|
| Dependent Variable: acratio                                                 |        |        |        |
| i/j                                                                         | 1      | 2      | 3      |
| 1                                                                           |        | 0.0154 | 0.8145 |
| 2                                                                           | 0.0154 |        | 0.0912 |
| 3                                                                           | 0.8145 | 0.0912 |        |

*The GLM Procedure*  
*Least Squares Means*

pt=16AA2042

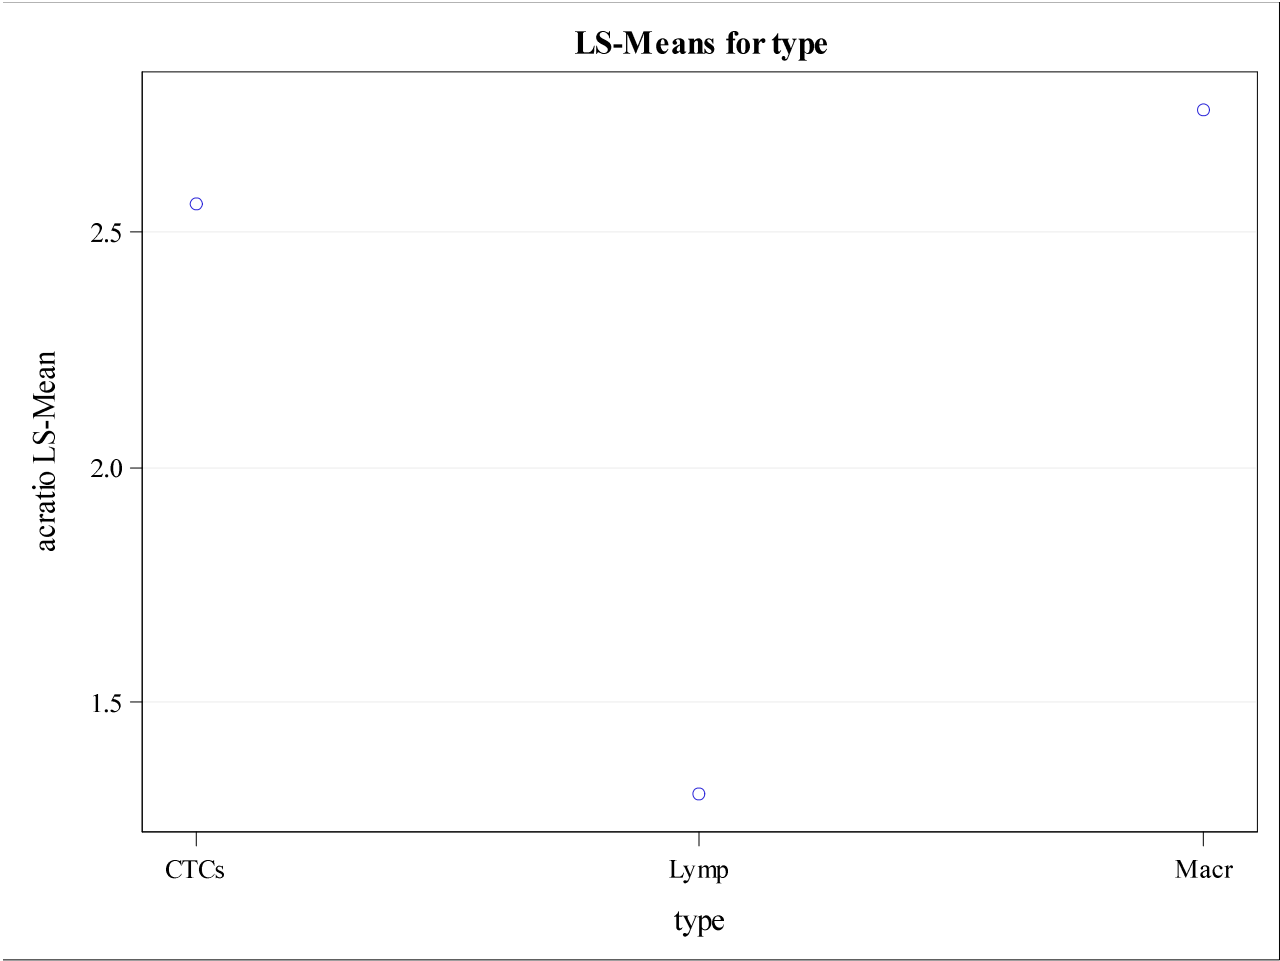

***The GLM Procedure***  
***Least Squares Means***

**pt=16AA2042**

**acratio Comparisons for type**

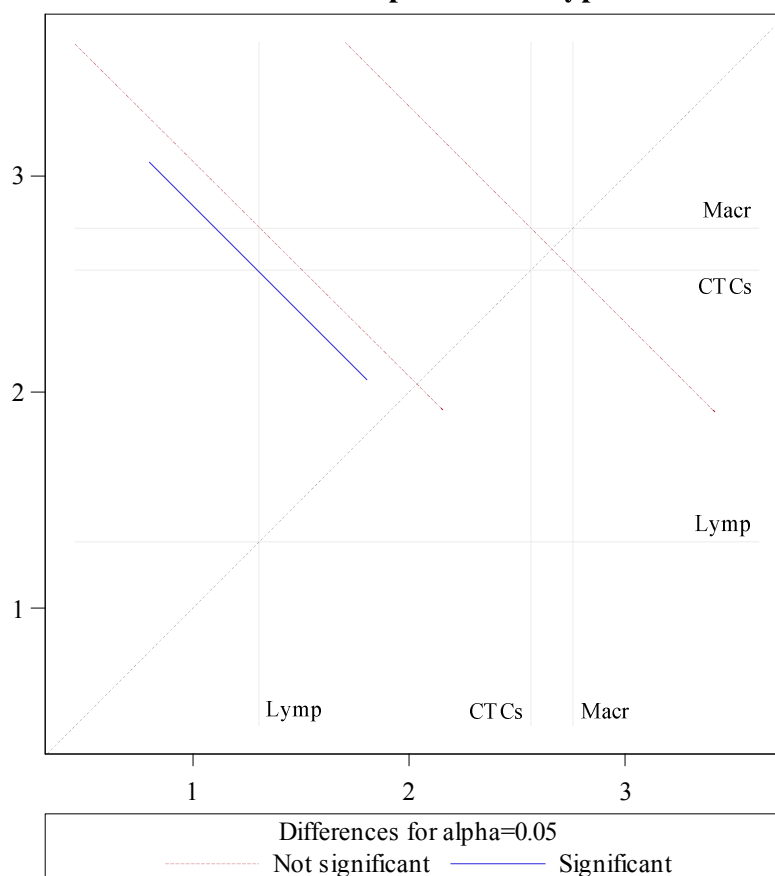

| type         | AvIntallsignals<br>LSMEAN | Standard<br>Error | Pr >  t | LSMEAN<br>Number |
|--------------|---------------------------|-------------------|---------|------------------|
| <b>CTCs</b>  | 11667.1625                | 856.9676          | <.0001  | 1                |
| <b>Lymph</b> | 25743.4091                | 812.9908          | <.0001  | 2                |
| <b>Macr</b>  | 13121.5963                | 1817.9028         | <.0001  | 3                |

| Least Squares Means for effect type<br>Pr >  t  for H0: LSMean(i)=LSMean(j) |        |        |        |
|-----------------------------------------------------------------------------|--------|--------|--------|
| Dependent Variable: AvIntallsignals                                         |        |        |        |
| i/j                                                                         | 1      | 2      | 3      |
| 1                                                                           |        | <.0001 | 0.4721 |
| 2                                                                           | <.0001 |        | <.0001 |
| 3                                                                           | 0.4721 | <.0001 |        |

*The GLM Procedure*  
*Least Squares Means*

pt=16AA2042

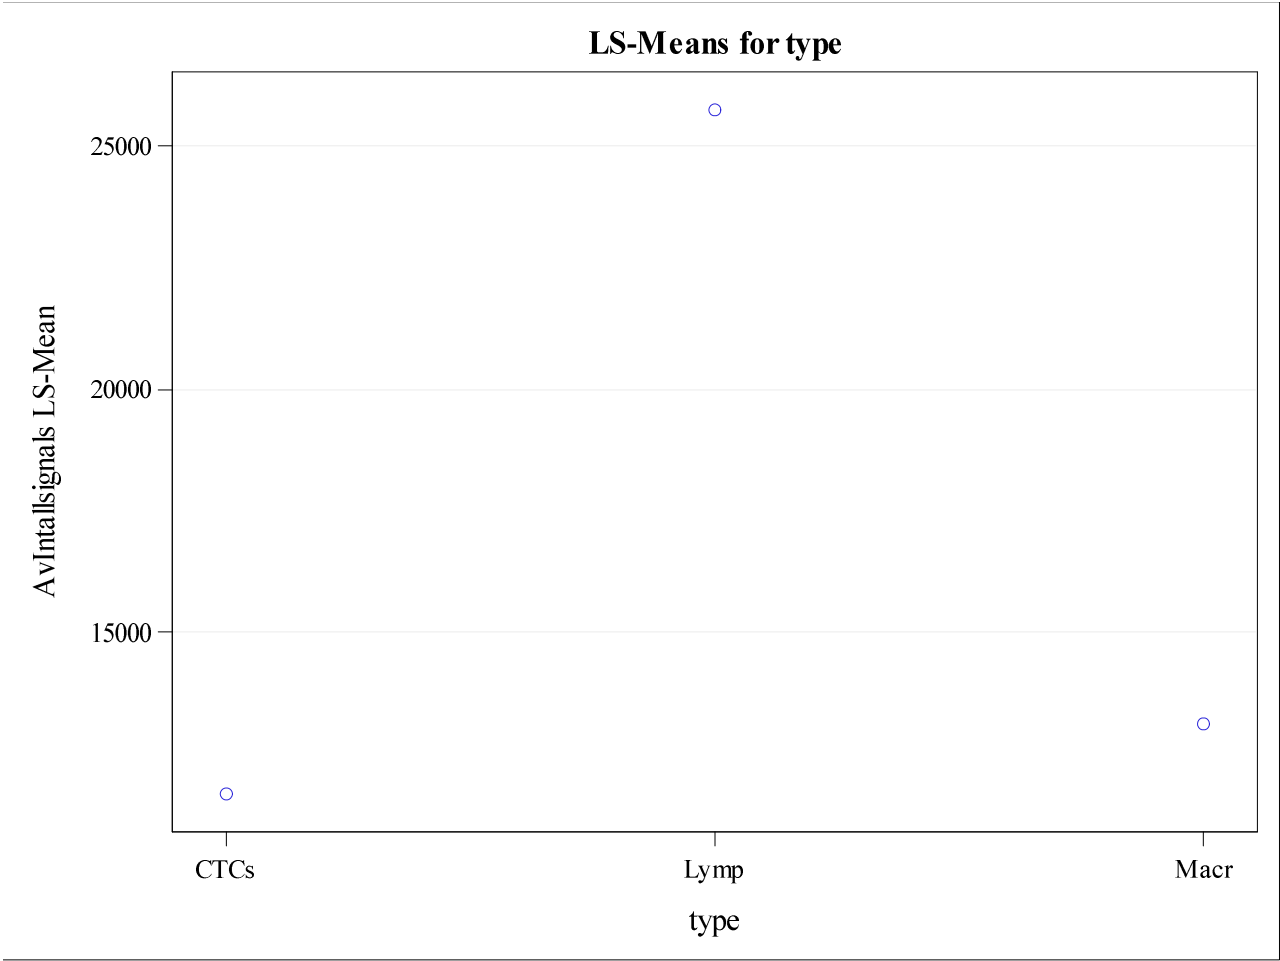

***The GLM Procedure***  
***Least Squares Means***

pt=16AA2042

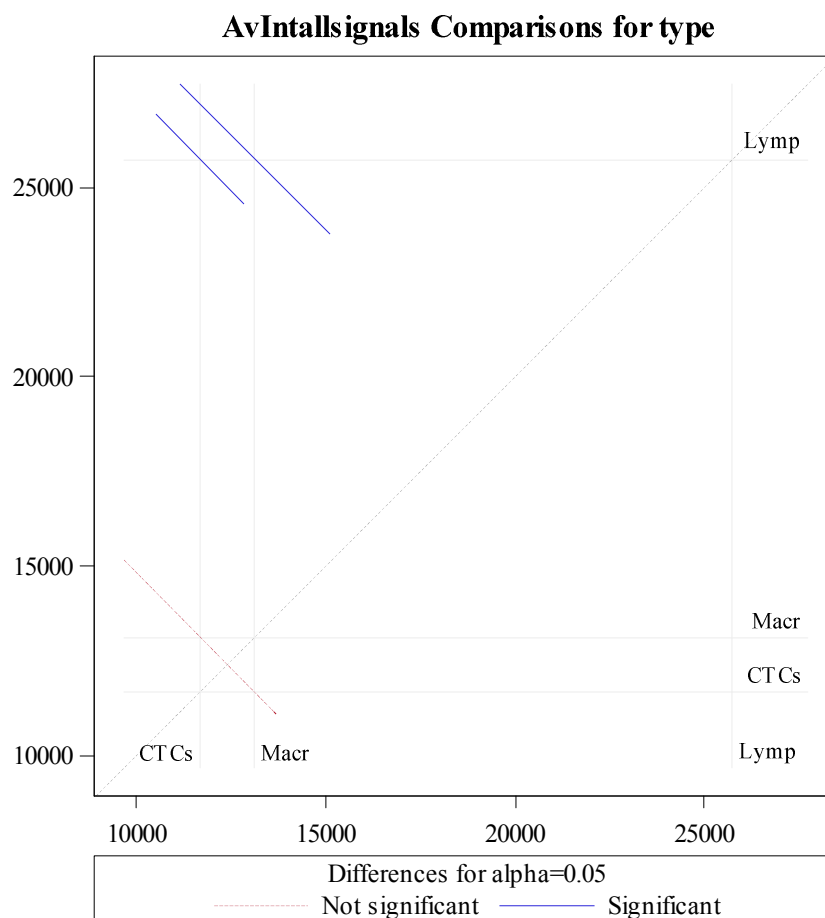

| type        | Totalintensity<br>LSMEAN | Standard<br>Error | Pr >  t | LSMEAN<br>Number |
|-------------|--------------------------|-------------------|---------|------------------|
| <b>CTCs</b> | 661122.704               | 59717.009         | <.0001  | 1                |
| <b>Lymp</b> | 630209.033               | 56652.529         | <.0001  | 2                |
| <b>Macr</b> | 264561.167               | 126678.906        | 0.0410  | 3                |

| Least Squares Means for effect type<br>Pr >  t  for H0: LSMean(i)=LSMean(j) |        |        |        |
|-----------------------------------------------------------------------------|--------|--------|--------|
| Dependent Variable: Totalintensity                                          |        |        |        |
| i/j                                                                         | 1      | 2      | 3      |
| 1                                                                           |        | 0.7086 | 0.0063 |
| 2                                                                           | 0.7086 |        | 0.0107 |
| 3                                                                           | 0.0063 | 0.0107 |        |



*The GLM Procedure*  
*Least Squares Means*

pt=16AA2042

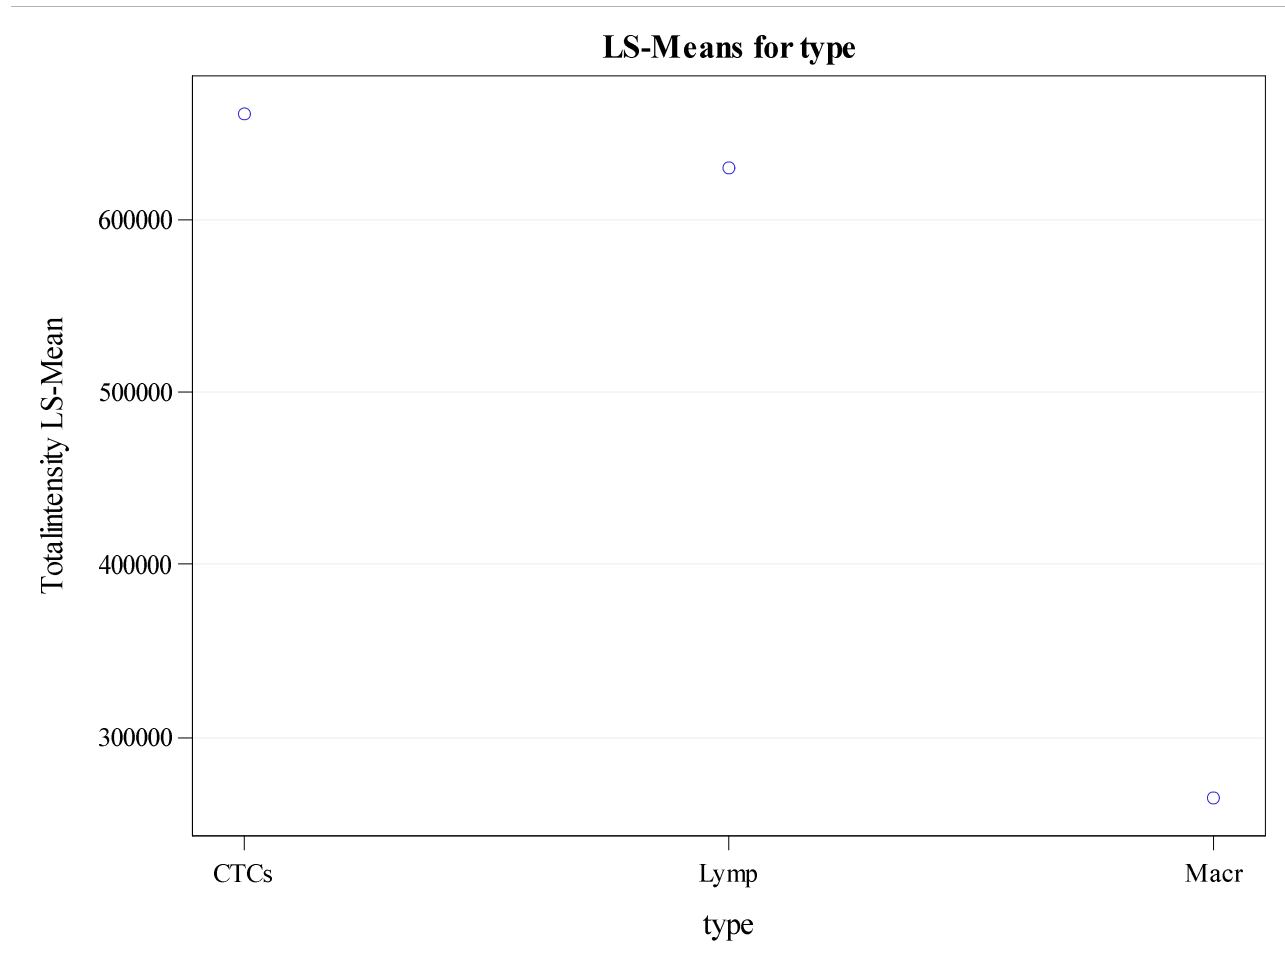

**The GLM Procedure**  
**Least Squares Means**

pt=16AA2042

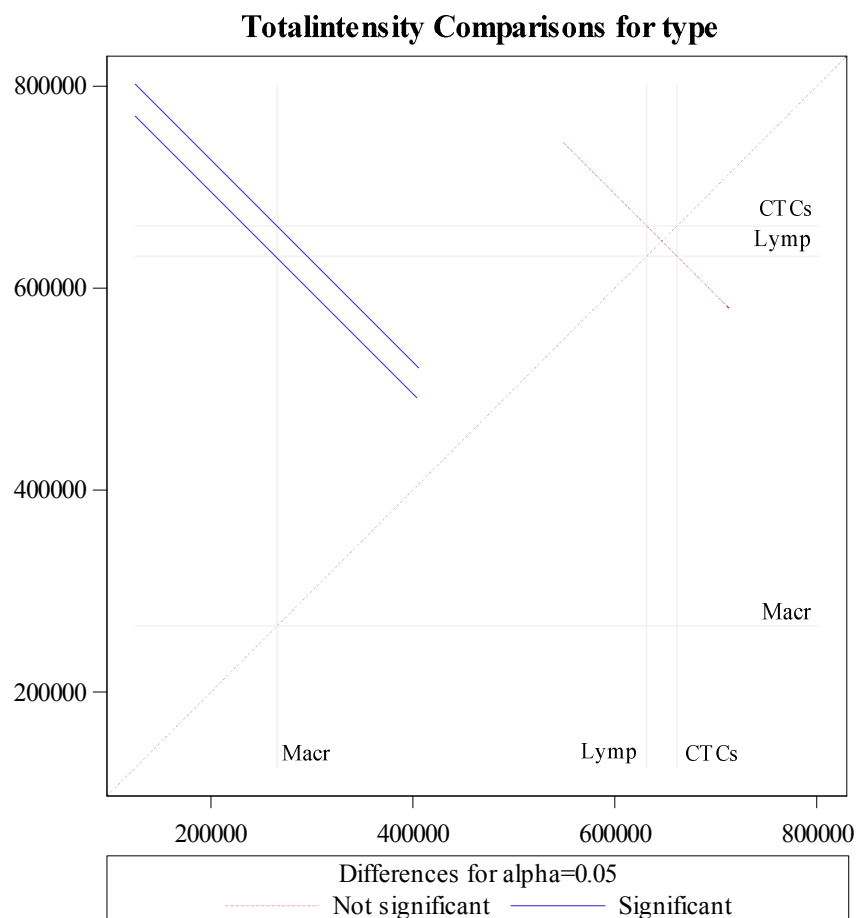

| type | Nuclearvolume<br>LSMEAN | Standard<br>Error | Pr >  t | LSMEAN<br>Number |
|------|-------------------------|-------------------|---------|------------------|
| CTCs | 832872.222              | 66351.678         | <.0001  | 1                |
| Lymp | 152642.800              | 62946.728         | 0.0183  | 2                |
| Macr | 661307.500              | 140753.164        | <.0001  | 3                |

| Least Squares Means for effect type<br>Pr >  t  for H0: LSMean(i)=LSMean(j) |        |        |        |
|-----------------------------------------------------------------------------|--------|--------|--------|
| Dependent Variable: Nuclearvolume                                           |        |        |        |
| i/j                                                                         | 1      | 2      | 3      |
| 1                                                                           |        | <.0001 | 0.2746 |
| 2                                                                           | <.0001 |        | 0.0016 |
| 3                                                                           | 0.2746 | 0.0016 |        |

*The GLM Procedure*  
*Least Squares Means*

pt=16AA2042

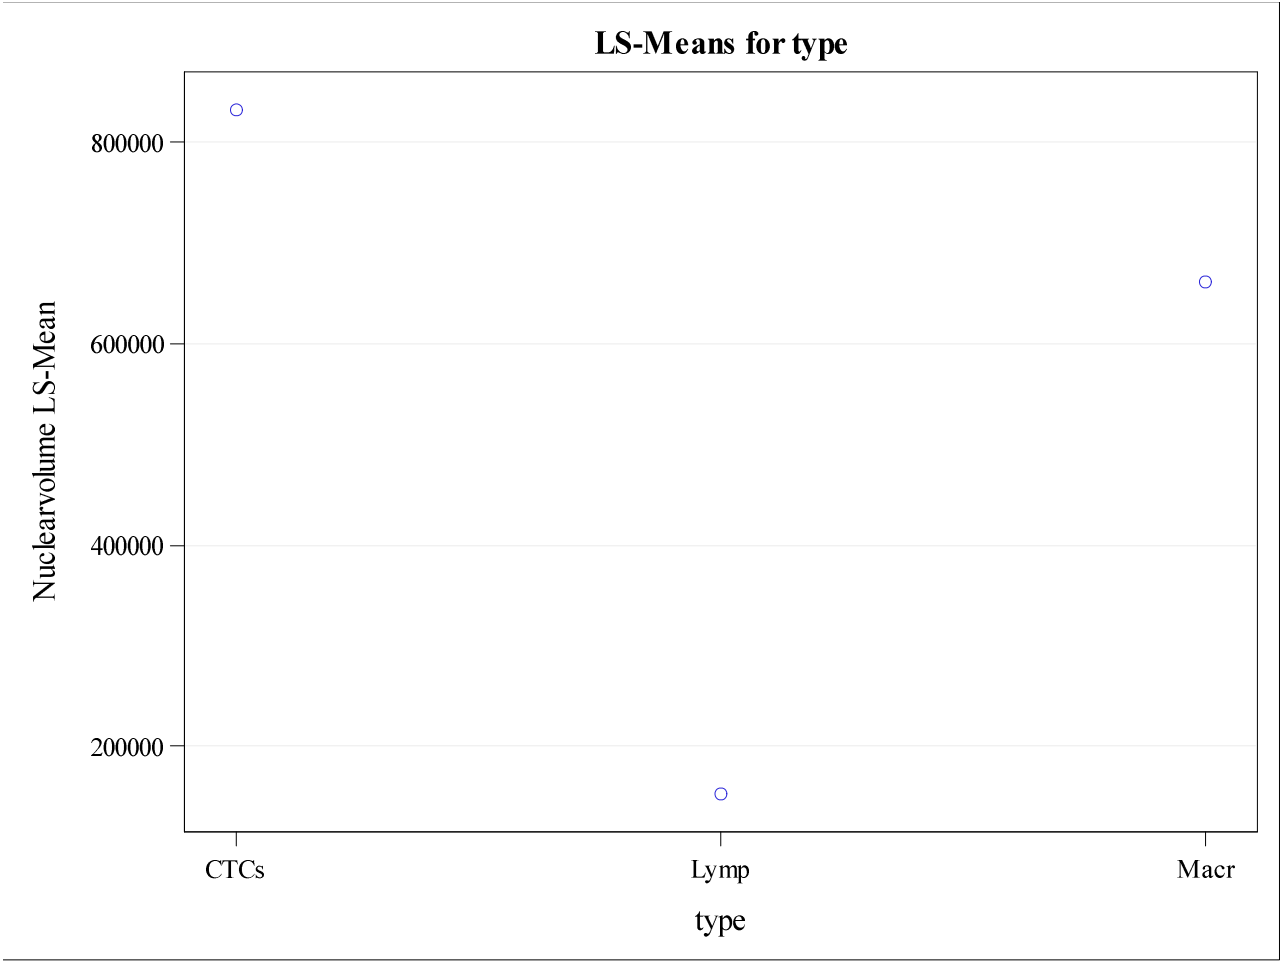

***The GLM Procedure***  
***Least Squares Means***

**pt=16AA2042**

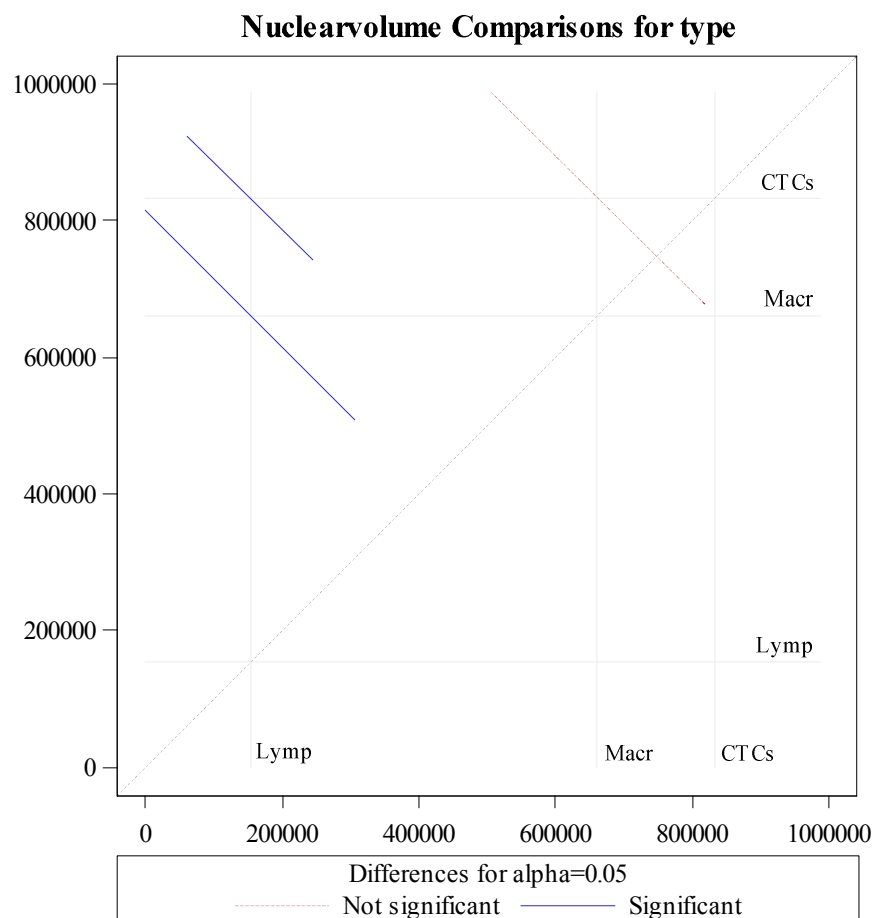

| type        | telomereperkvol<br>LSMEAN | Standard<br>Error | Pr >  t | LSMEAN<br>Number |
|-------------|---------------------------|-------------------|---------|------------------|
| <b>CTCs</b> | 0.07666026                | 0.00767449        | <.0001  | 1                |
| <b>Lymp</b> | 0.16241148                | 0.00728066        | <.0001  | 2                |
| <b>Macr</b> | 0.03353455                | 0.01628005        | 0.0438  | 3                |

| Least Squares Means for effect type<br>Pr >  t  for H0: LSMean(i)=LSMean(j) |        |        |        |
|-----------------------------------------------------------------------------|--------|--------|--------|
| Dependent Variable: telomereperkvol                                         |        |        |        |
| i/j                                                                         | 1      | 2      | 3      |
| 1                                                                           |        | <.0001 | 0.0197 |
| 2                                                                           | <.0001 |        | <.0001 |
| 3                                                                           | 0.0197 | <.0001 |        |

*The GLM Procedure*  
*Least Squares Means*

pt=16AA2042

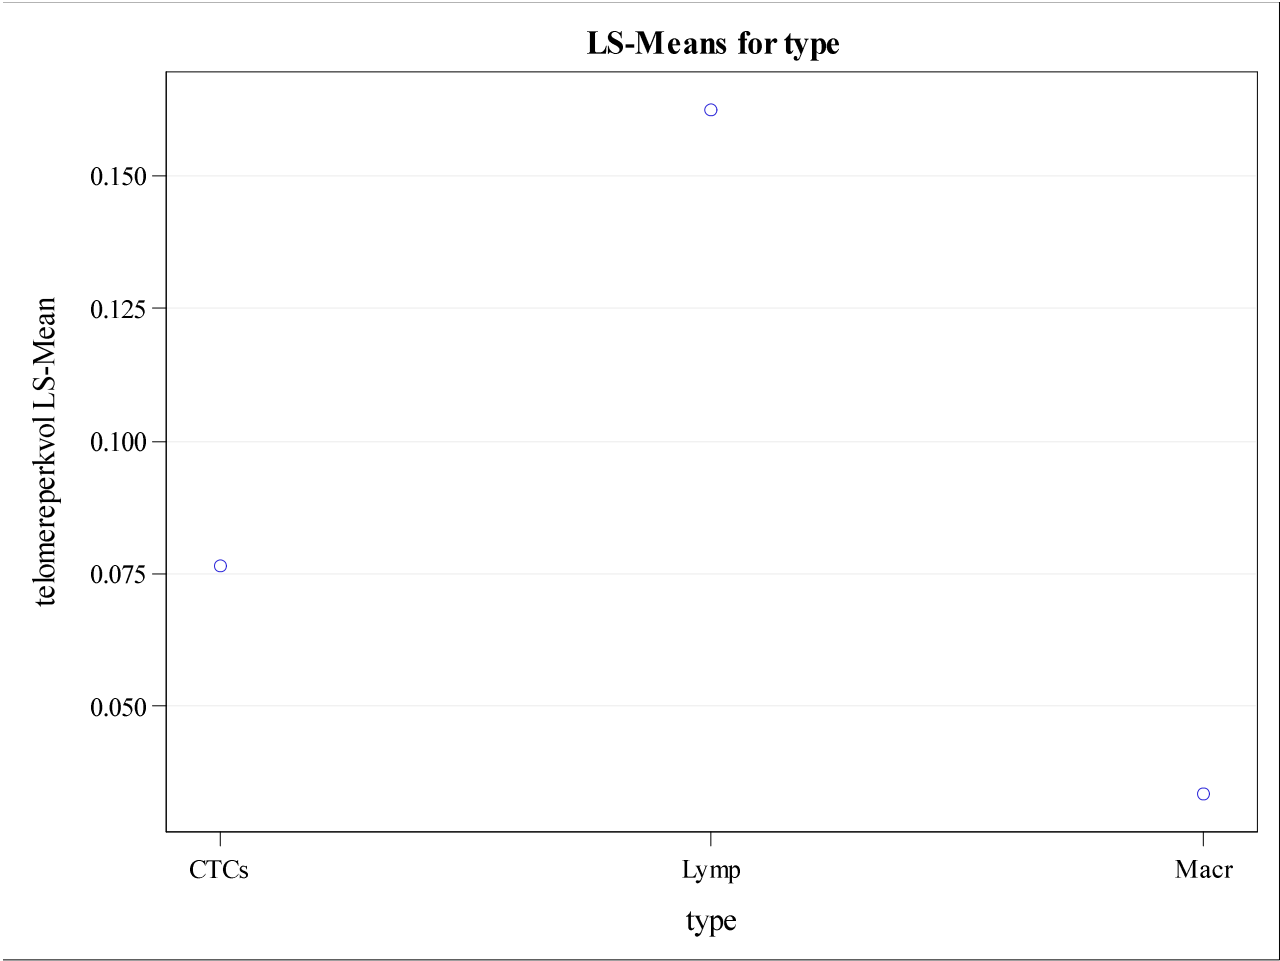

*The GLM Procedure*  
*Least Squares Means*

pt=16AA2042

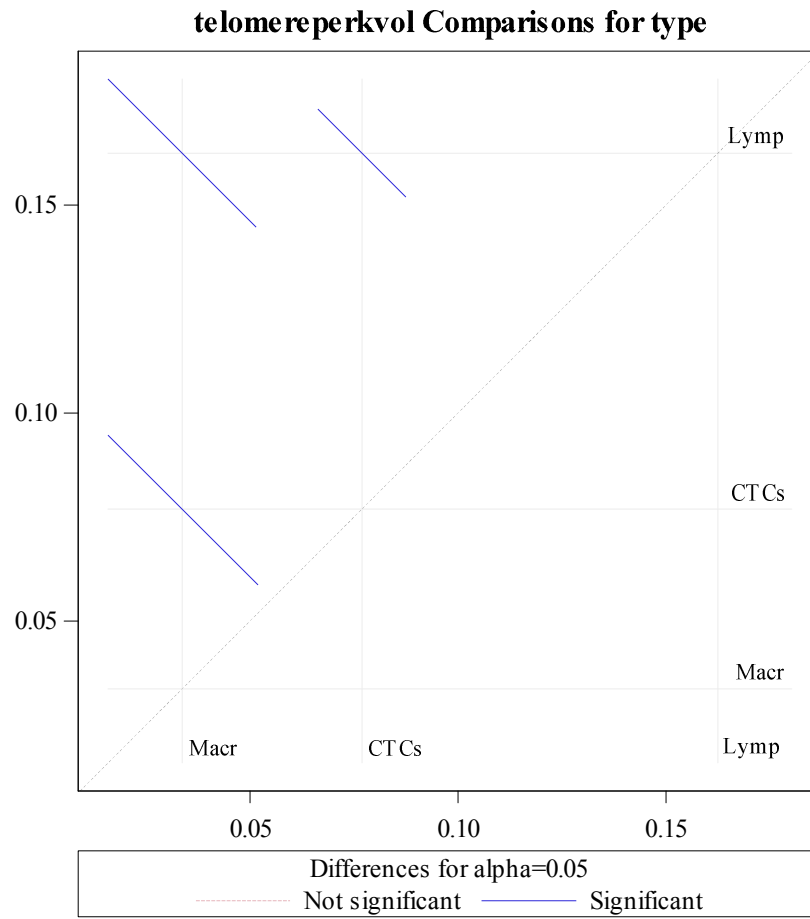

**Note:** To ensure overall protection level, only probabilities associated with pre-planned comparisons should be used.

***The GLM Procedure*****pt=16AA7266**

| Class Level Information |        |                |
|-------------------------|--------|----------------|
| Class                   | Levels | Values         |
| type                    | 3      | CTCs Lymp Macr |

|                             |    |
|-----------------------------|----|
| Number of Observations Read | 83 |
| Number of Observations Used | 83 |

**The GLM Procedure**

**Dependent Variable: Totalnofsignals**  
**Totalnofsignals**

pt=16AA7266

| Source                 | DF | Sum of Squares | Mean Square | F Value | Pr > F |
|------------------------|----|----------------|-------------|---------|--------|
| <b>Model</b>           | 2  | 6658.21552     | 3329.10776  | 9.78    | 0.0002 |
| <b>Error</b>           | 80 | 27238.67605    | 340.48345   |         |        |
| <b>Corrected Total</b> | 82 | 33896.89157    |             |         |        |

| R-Square | Coeff Var | Root MSE | Totalnofsignals Mean |
|----------|-----------|----------|----------------------|
| 0.196426 | 65.81573  | 18.45219 | 28.03614             |

| Source      | DF | Type III SS | Mean Square | F Value | Pr > F |
|-------------|----|-------------|-------------|---------|--------|
| <b>type</b> | 2  | 6658.215515 | 3329.107758 | 9.78    | 0.0002 |

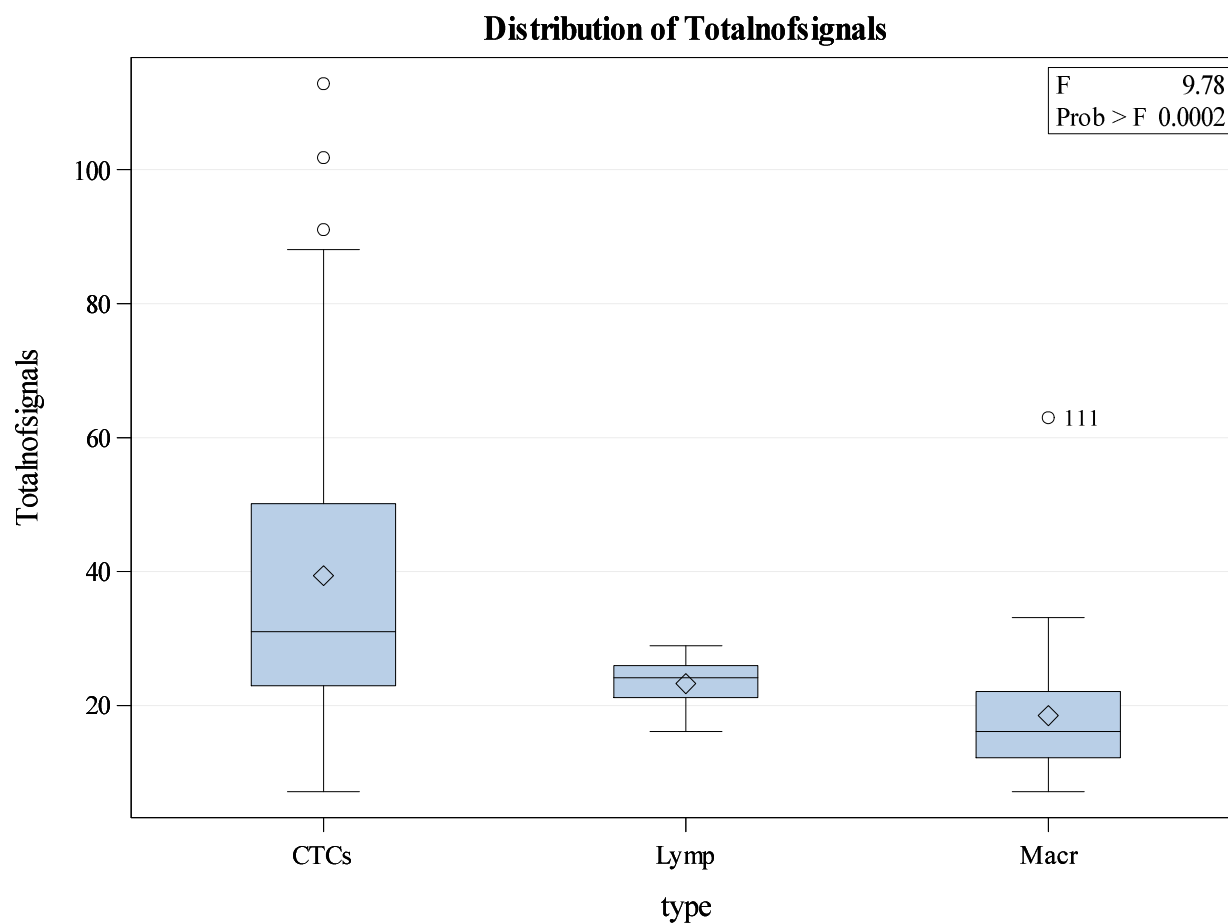



**The GLM Procedure****Dependent Variable: Totalnofaggregates Totalnofaggregates****pt=16AA7266**

| Source          | DF | Sum of Squares | Mean Square | F Value | Pr > F |
|-----------------|----|----------------|-------------|---------|--------|
| Model           | 2  | 121.7746434    | 60.8873217  | 7.58    | 0.0010 |
| Error           | 80 | 642.6349951    | 8.0329374   |         |        |
| Corrected Total | 82 | 764.4096386    |             |         |        |

| R-Square | Coeff Var | Root MSE | Totalnofaggregates Mean |
|----------|-----------|----------|-------------------------|
| 0.159305 | 97.20753  | 2.834244 | 2.915663                |

| Source | DF | Type III SS | Mean Square | F Value | Pr > F |
|--------|----|-------------|-------------|---------|--------|
| type   | 2  | 121.7746434 | 60.8873217  | 7.58    | 0.0010 |

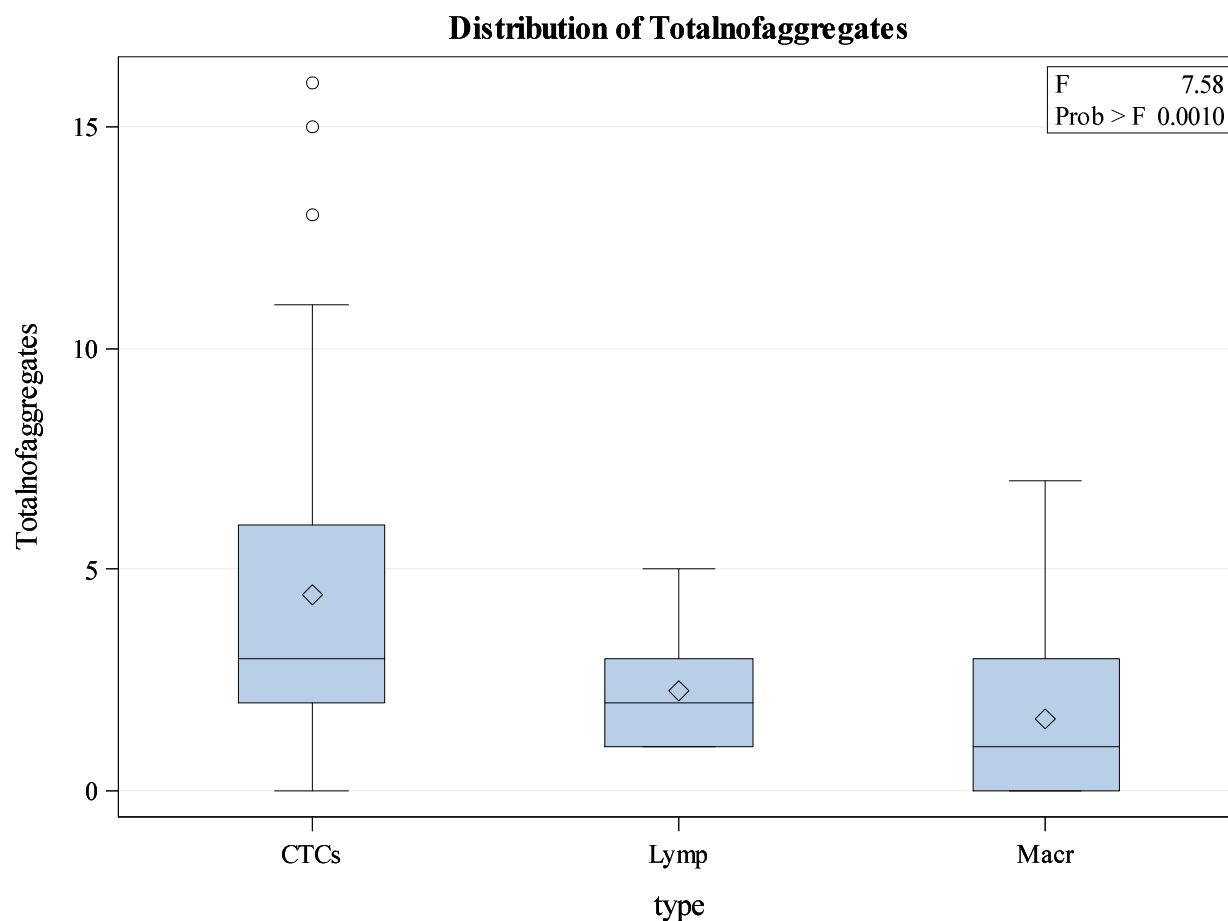

**The GLM Procedure**

**Dependent Variable: acratio**  
**acratio**

**pt=16AA7266**

| Source                 | DF | Sum of Squares | Mean Square | F Value | Pr > F |
|------------------------|----|----------------|-------------|---------|--------|
| <b>Model</b>           | 2  | 15.0083748     | 7.5041874   | 2.53    | 0.0860 |
| <b>Error</b>           | 80 | 237.2223645    | 2.9652796   |         |        |
| <b>Corrected Total</b> | 82 | 252.2307393    |             |         |        |

| R-Square | Coeff Var | Root MSE | acratio Mean |
|----------|-----------|----------|--------------|
| 0.059503 | 72.03649  | 1.721999 | 2.390454     |

| Source      | DF | Type III SS | Mean Square | F Value | Pr > F |
|-------------|----|-------------|-------------|---------|--------|
| <b>type</b> | 2  | 15.00837480 | 7.50418740  | 2.53    | 0.0860 |

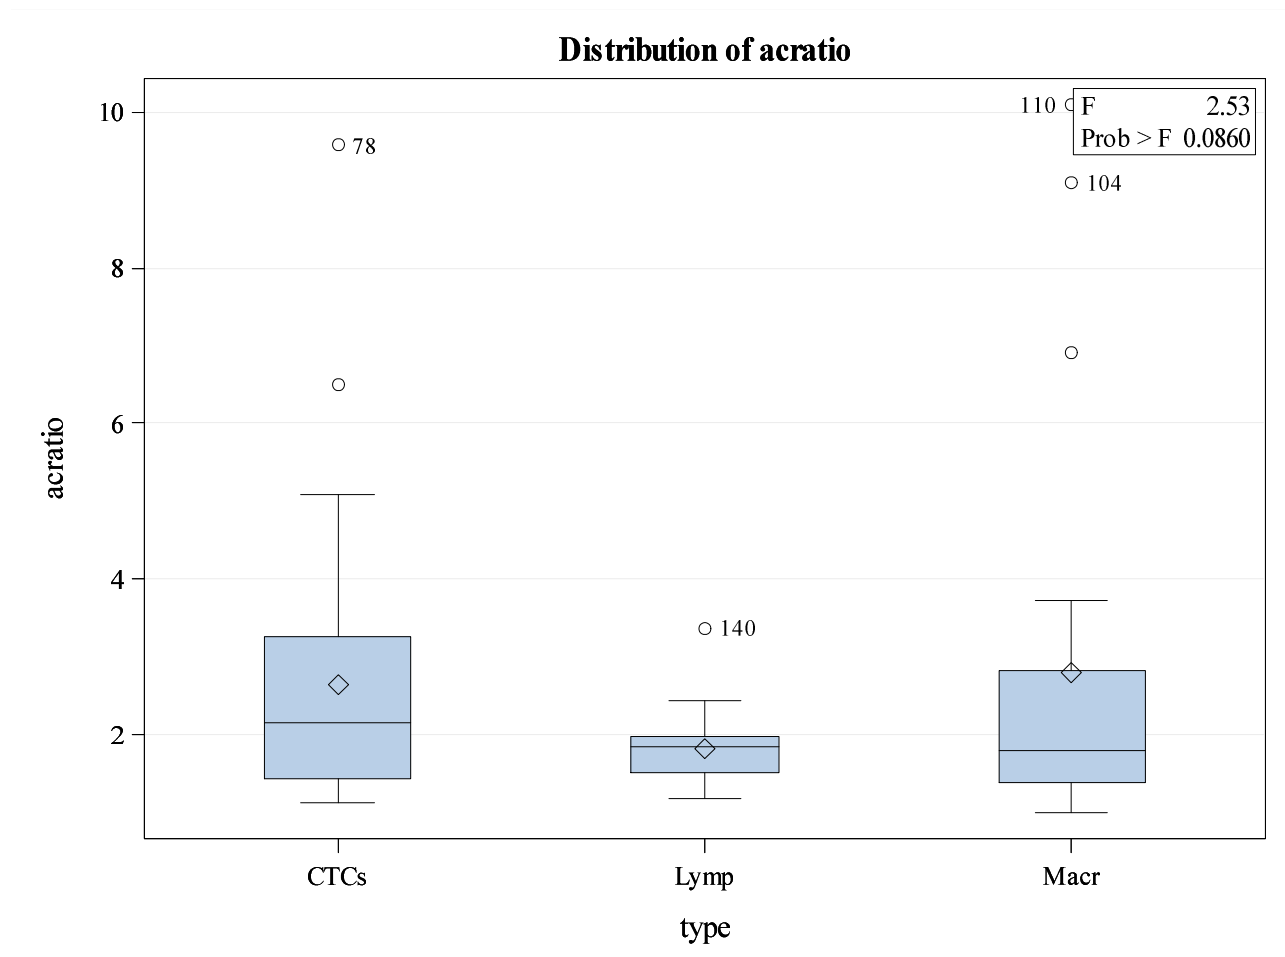

**The GLM Procedure**

**Dependent Variable: AvIntallsignals**  
**AvIntallsignals**

**pt=16AA7266**

| Source                 | DF | Sum of Squares | Mean Square | F Value | Pr > F |
|------------------------|----|----------------|-------------|---------|--------|
| <b>Model</b>           | 2  | 2397076160     | 1198538080  | 52.52   | <.0001 |
| <b>Error</b>           | 80 | 1825778070     | 22822226    |         |        |
| <b>Corrected Total</b> | 82 | 4222854231     |             |         |        |

| R-Square | Coeff Var | Root MSE | AvIntallsignals Mean |
|----------|-----------|----------|----------------------|
| 0.567644 | 31.36752  | 4777.261 | 15229.96             |

| Source      | DF | Type III SS | Mean Square | F Value | Pr > F |
|-------------|----|-------------|-------------|---------|--------|
| <b>type</b> | 2  | 2397076160  | 1198538080  | 52.52   | <.0001 |

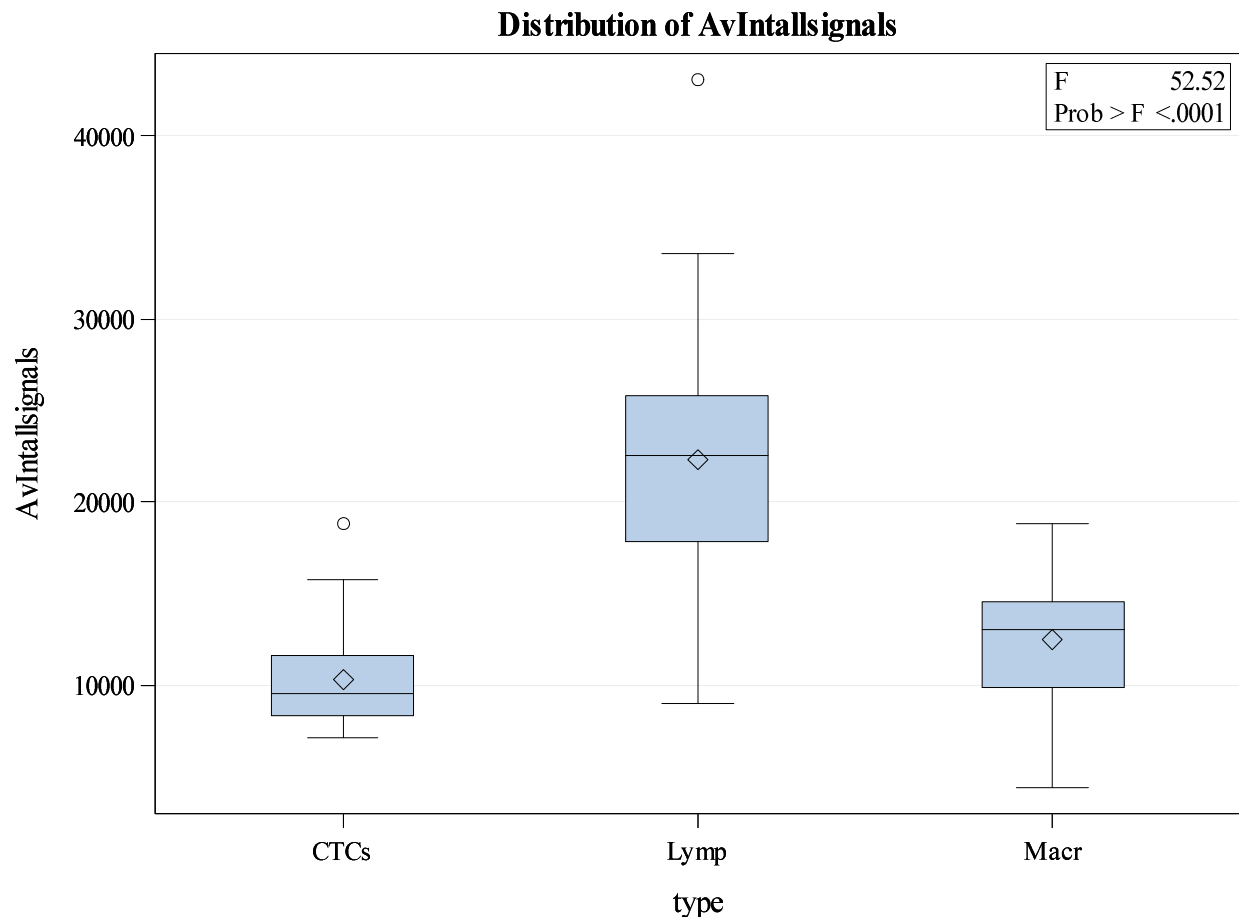

**The GLM Procedure**

**Dependent Variable: Totalintensity**  
**Totalintensity**

**pt=16AA7266**

| Source                 | DF | Sum of Squares | Mean Square  | F Value | Pr > F |
|------------------------|----|----------------|--------------|---------|--------|
| <b>Model</b>           | 2  | 1.0046272E12   | 502313590088 | 14.99   | <.0001 |
| <b>Error</b>           | 80 | 2.681234E12    | 33515424484  |         |        |
| <b>Corrected Total</b> | 82 | 3.6858611E12   |              |         |        |

| R-Square | Coeff Var | Root MSE | Totalintensity Mean |
|----------|-----------|----------|---------------------|
| 0.272562 | 47.20276  | 183072.2 | 387842.1            |

| Source      | DF | Type III SS  | Mean Square  | F Value | Pr > F |
|-------------|----|--------------|--------------|---------|--------|
| <b>type</b> | 2  | 1.0046272E12 | 502313590088 | 14.99   | <.0001 |

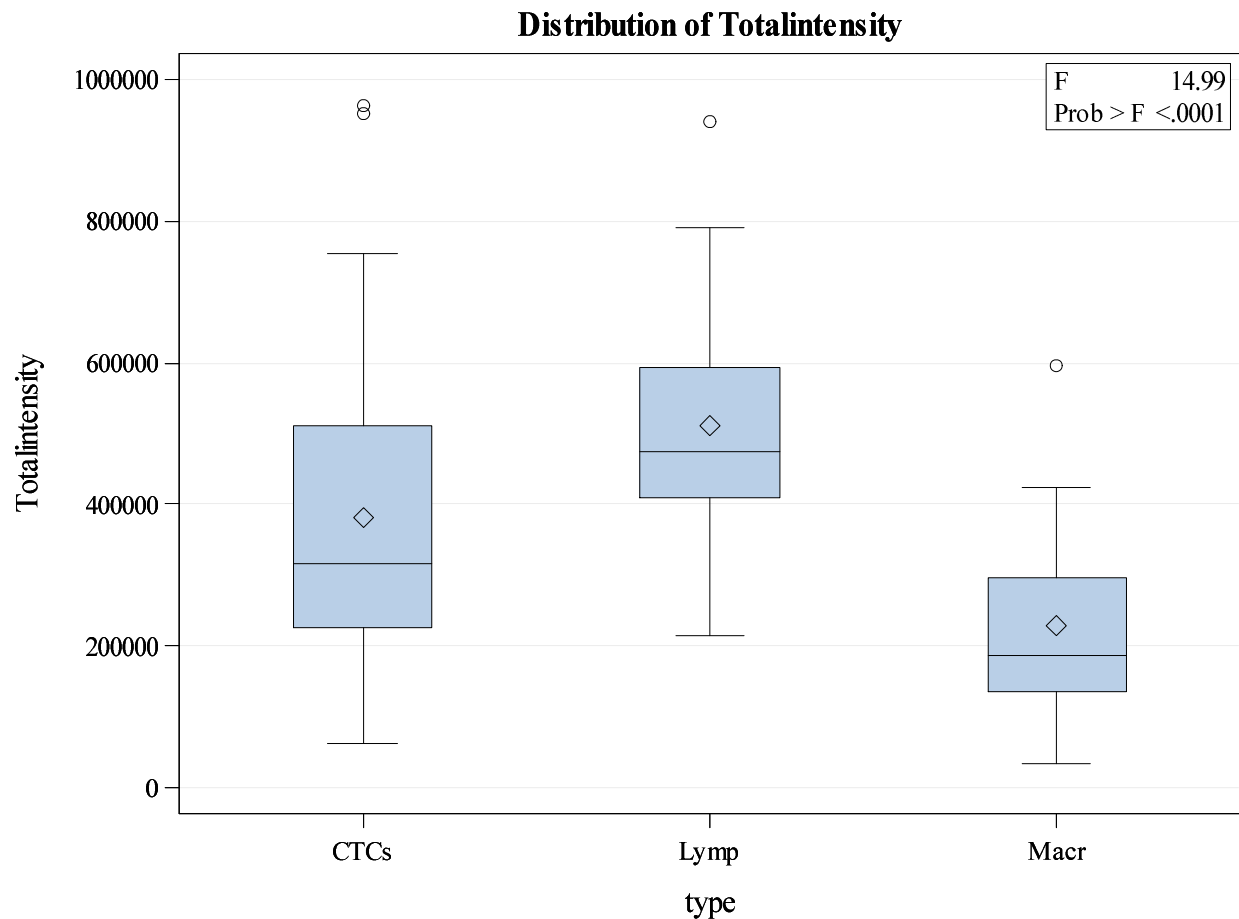

**The GLM Procedure**

**Dependent Variable: Nuclearvolume**  
**Nuclearvolume**

pt=16AA7266

| Source                 | DF | Sum of Squares | Mean Square  | F Value | Pr > F |
|------------------------|----|----------------|--------------|---------|--------|
| <b>Model</b>           | 2  | 8.8354185E12   | 4.4177093E12 | 74.23   | <.0001 |
| <b>Error</b>           | 80 | 4.7610272E12   | 59512840558  |         |        |
| <b>Corrected Total</b> | 82 | 1.3596446E13   |              |         |        |

| R-Square | Coeff Var | Root MSE | Nuclearvolume Mean |
|----------|-----------|----------|--------------------|
| 0.649833 | 44.54691  | 243952.5 | 547630.7           |

| Source      | DF | Type III SS  | Mean Square  | F Value | Pr > F |
|-------------|----|--------------|--------------|---------|--------|
| <b>type</b> | 2  | 8.8354185E12 | 4.4177093E12 | 74.23   | <.0001 |

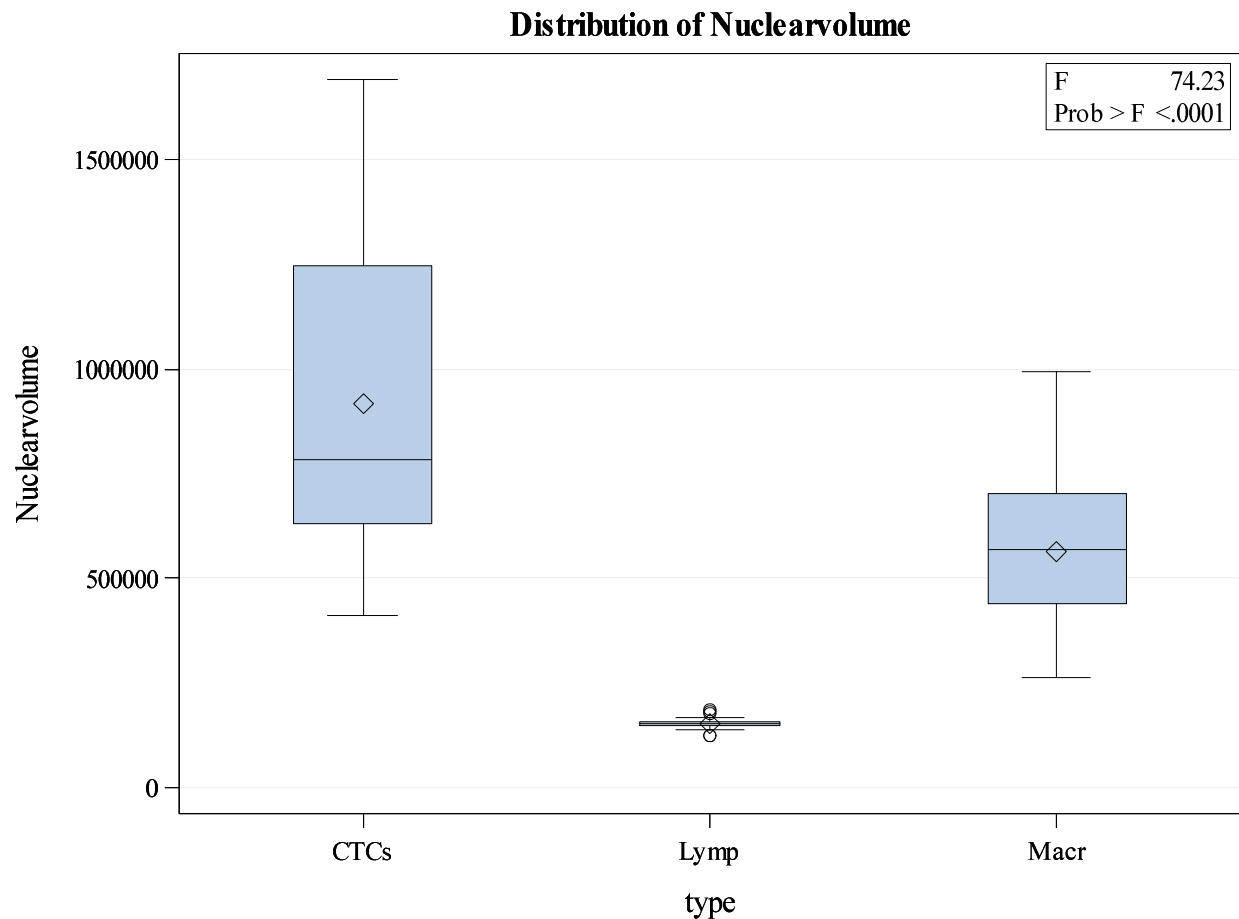

**The GLM Procedure****Dependent Variable: telomereperkvol****pt=16AA7266**

| Source                 | DF | Sum of Squares | Mean Square | F Value | Pr > F |
|------------------------|----|----------------|-------------|---------|--------|
| <b>Model</b>           | 2  | 0.24360278     | 0.12180139  | 239.53  | <.0001 |
| <b>Error</b>           | 80 | 0.04068063     | 0.00050851  |         |        |
| <b>Corrected Total</b> | 82 | 0.28428341     |             |         |        |

| R-Square | Coeff Var | Root MSE | telomereperkvol Mean |
|----------|-----------|----------|----------------------|
| 0.856901 | 28.44140  | 0.022550 | 0.079286             |

| Source      | DF | Type III SS | Mean Square | F Value | Pr > F |
|-------------|----|-------------|-------------|---------|--------|
| <b>type</b> | 2  | 0.24360278  | 0.12180139  | 239.53  | <.0001 |

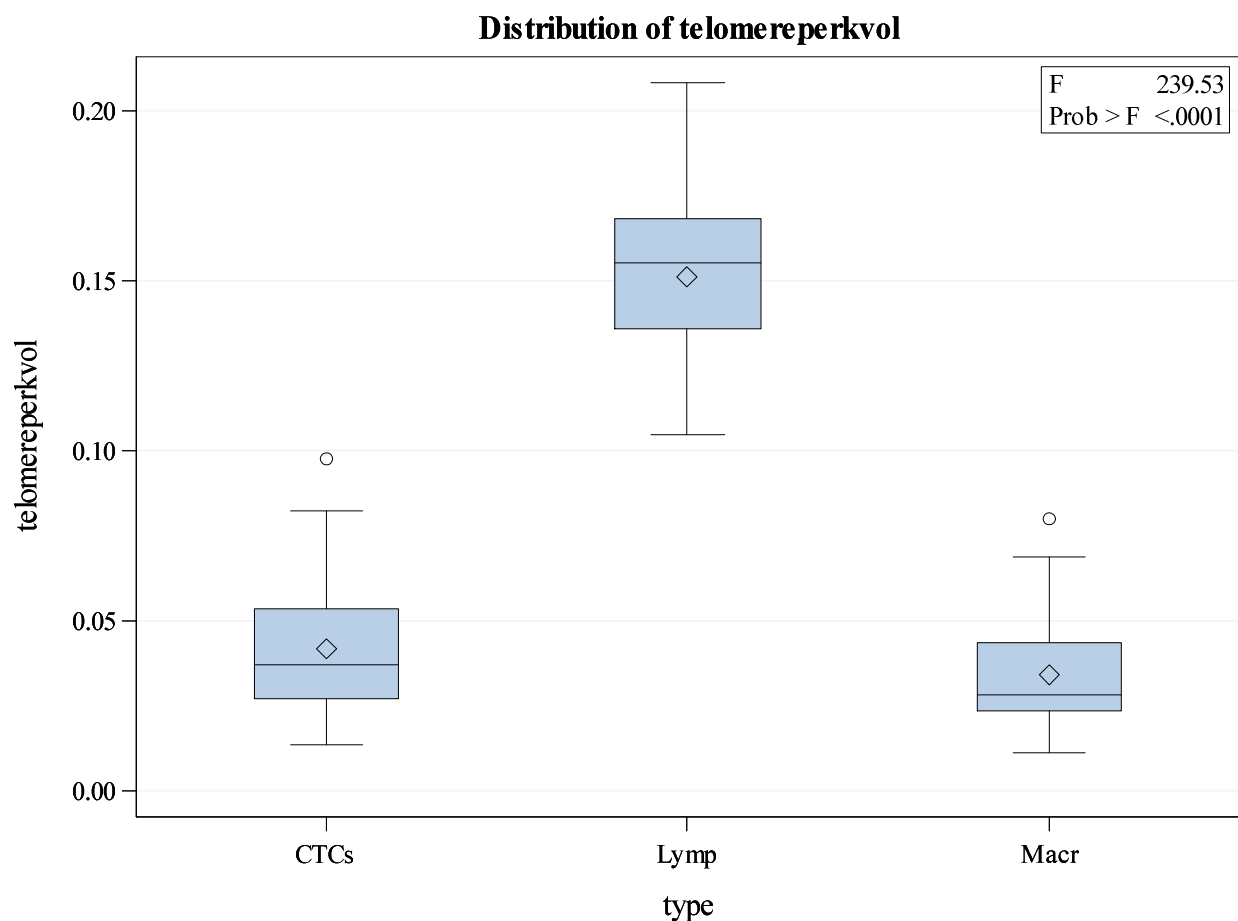

**The GLM Procedure**  
**Least Squares Means**

pt=16AA7266

| type | Totalnofsignals<br>LSMEAN | Standard<br>Error | Pr >  t | LSMEAN<br>Number |
|------|---------------------------|-------------------|---------|------------------|
| CTCs | 39.3870968                | 3.3141118         | <.0001  | 1                |
| Lymp | 23.2666667                | 3.3688942         | <.0001  | 2                |
| Macr | 18.5454545                | 3.9340209         | <.0001  | 3                |

| Least Squares Means for effect type<br>Pr >  t  for H0: LSMean(i)=LSMean(j) |        |        |        |
|-----------------------------------------------------------------------------|--------|--------|--------|
| Dependent Variable: Totalnofsignals                                         |        |        |        |
| i/j                                                                         | 1      | 2      | 3      |
| 1                                                                           |        | 0.0010 | 0.0001 |
| 2                                                                           | 0.0010 |        | 0.3647 |
| 3                                                                           | 0.0001 | 0.3647 |        |

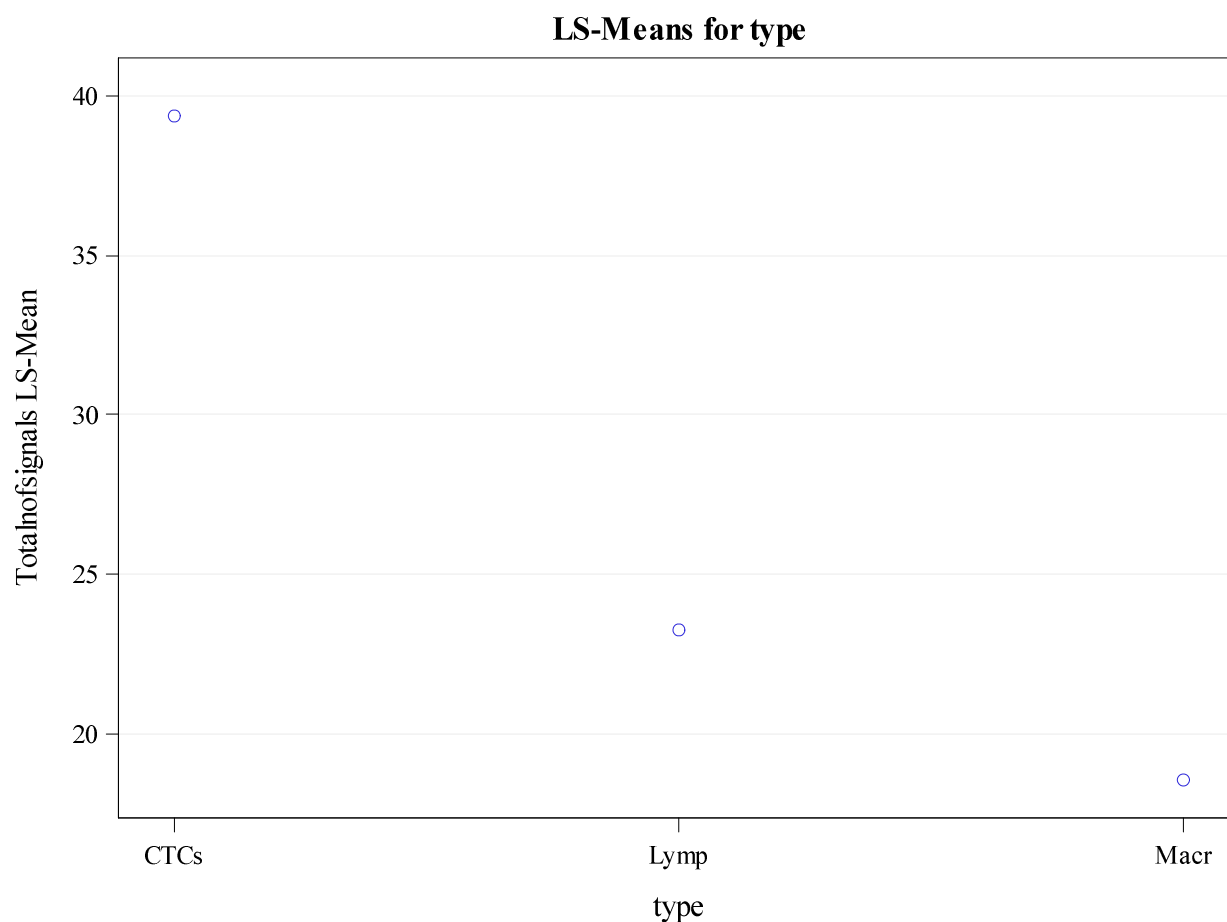

*The GLM Procedure*  
*Least Squares Means*

pt=16AA7266

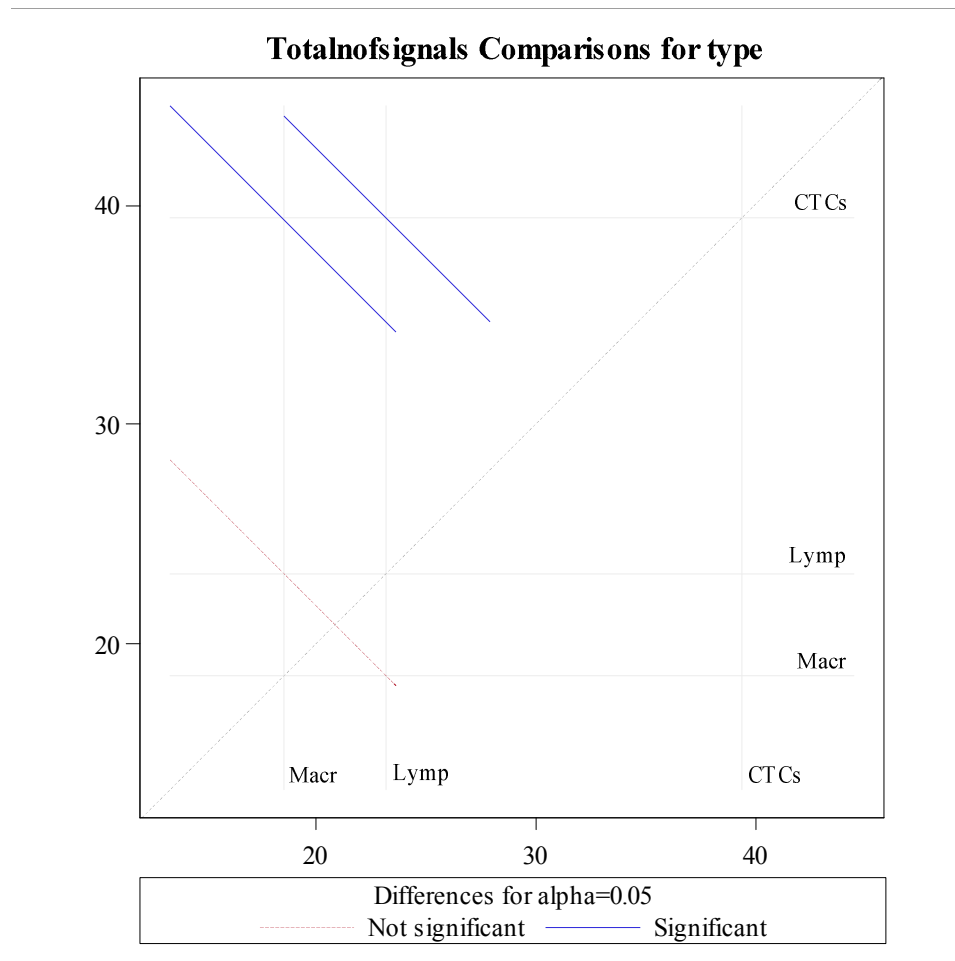

| type        | Totalnofaggregates<br>LSMEAN | Standard<br>Error | Pr >  t | LSMEAN<br>Number |
|-------------|------------------------------|-------------------|---------|------------------|
| <b>CTCs</b> | 4.45161290                   | 0.50904520        | <.0001  | 1                |
| <b>Lymp</b> | 2.26666667                   | 0.51745974        | <.0001  | 2                |
| <b>Macr</b> | 1.63636364                   | 0.60426279        | 0.0083  | 3                |



*The GLM Procedure*  
*Least Squares Means*

pt=16AA7266

| Least Squares Means for effect type    |        |        |        |
|----------------------------------------|--------|--------|--------|
| Pr >  t  for H0: LSMean(i)=LSMean(j)   |        |        |        |
| Dependent Variable: Totalnofaggregates |        |        |        |
| i/j                                    | 1      | 2      | 3      |
| 1                                      |        | 0.0035 | 0.0006 |
| 2                                      | 0.0035 |        | 0.4305 |
| 3                                      | 0.0006 | 0.4305 |        |

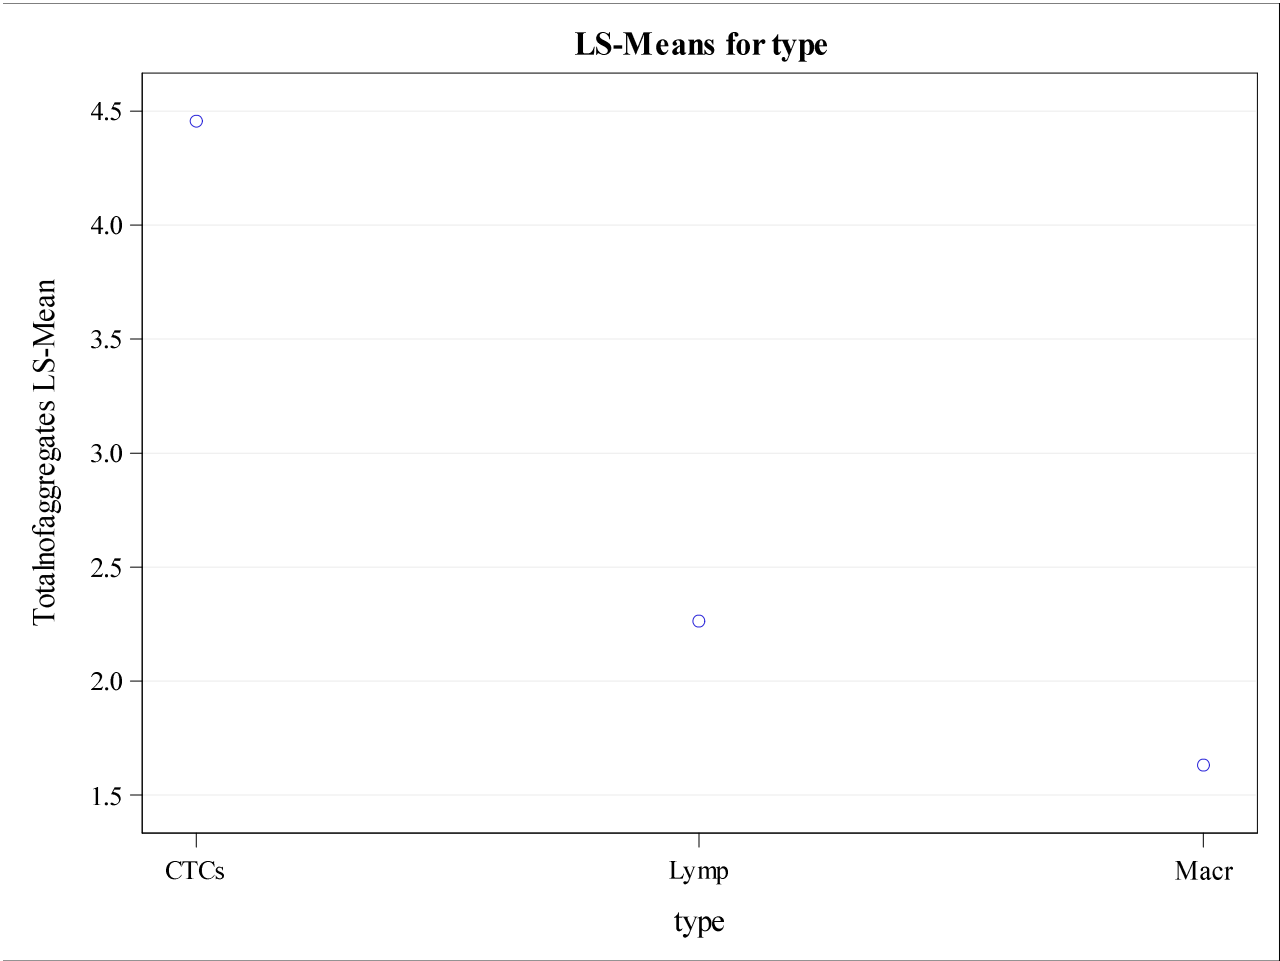

**The GLM Procedure**  
**Least Squares Means**

pt=16AA7266

**Totalnofaggregates Comparisons for type**

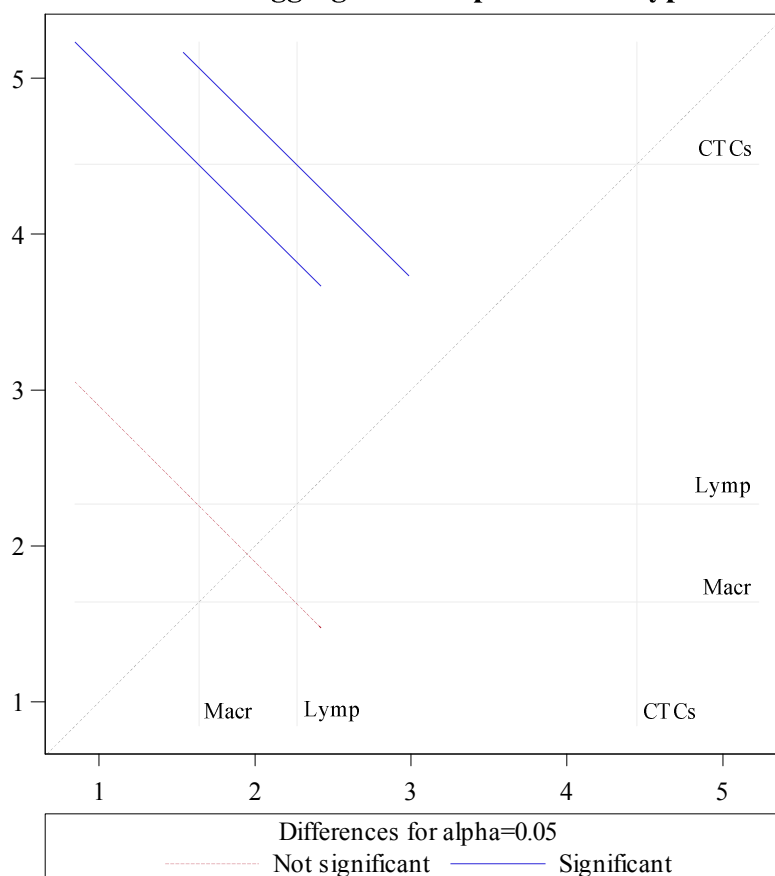

| type        | acratio<br>LSMEAN | Standard<br>Error | Pr >  t | LSMEAN<br>Number |
|-------------|-------------------|-------------------|---------|------------------|
| <b>CTCs</b> | 2.63963675        | 0.30928010        | <.0001  | 1                |
| <b>Lymp</b> | 1.83162377        | 0.31439251        | <.0001  | 2                |
| <b>Macr</b> | 2.80137230        | 0.36713136        | <.0001  | 3                |

| Least Squares Means for effect type<br>Pr >  t  for H0: LSMean(i)=LSMean(j) |        |        |        |
|-----------------------------------------------------------------------------|--------|--------|--------|
| Dependent Variable: acratio                                                 |        |        |        |
| i/j                                                                         | 1      | 2      | 3      |
| 1                                                                           |        | 0.0706 | 0.7371 |
| 2                                                                           | 0.0706 |        | 0.0482 |
| 3                                                                           | 0.7371 | 0.0482 |        |

*The GLM Procedure*  
*Least Squares Means*

pt=16AA7266

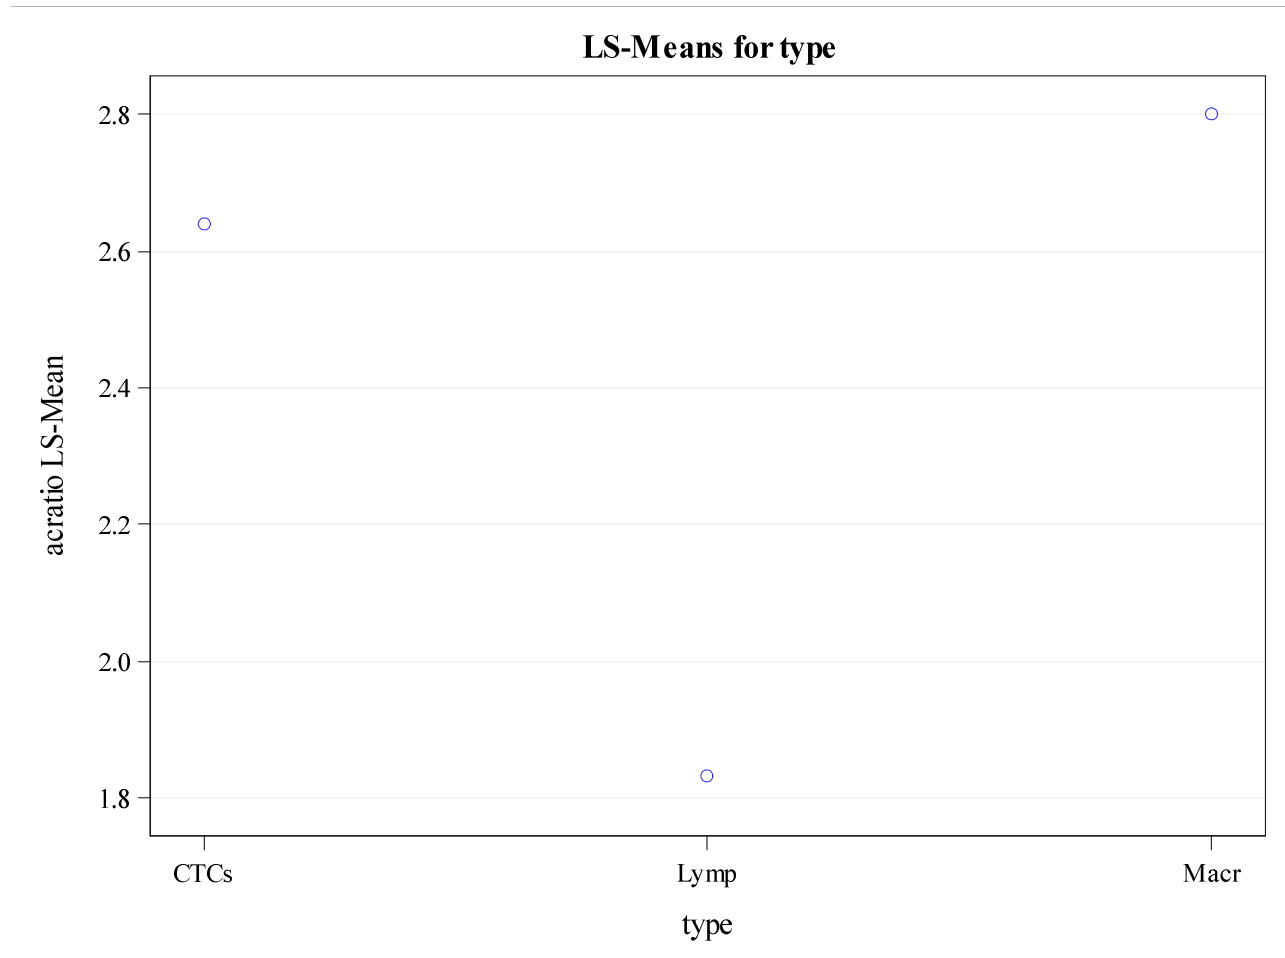

***The GLM Procedure***  
***Least Squares Means***

**pt=16AA7266**

**acratio Comparisons for type**

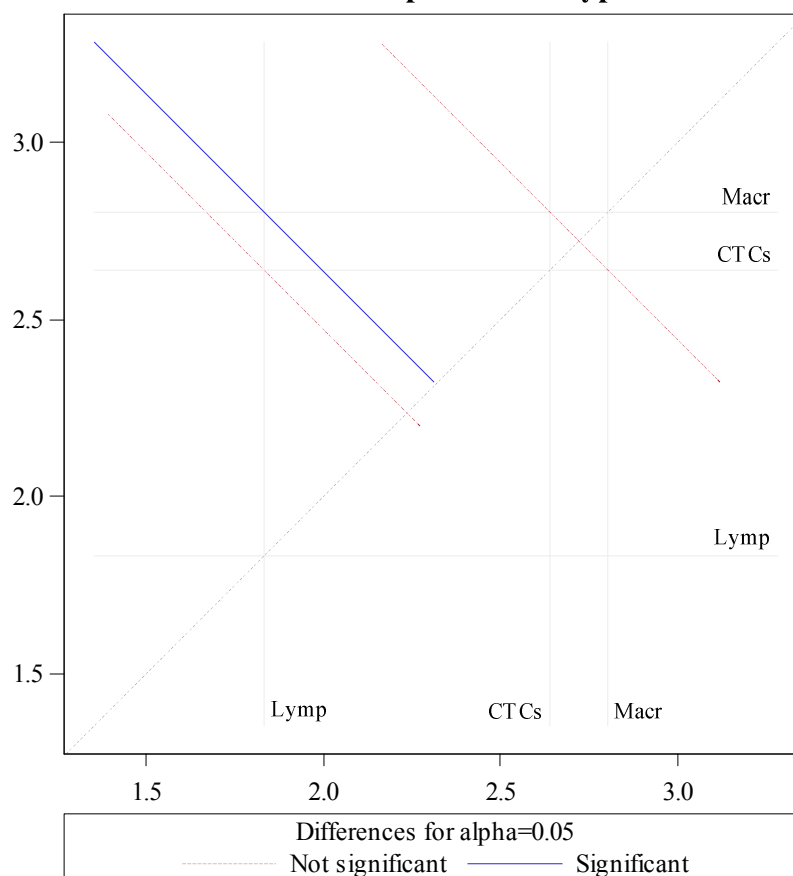

| type        | AvIntallsignals<br>LSMEAN | Standard<br>Error | Pr >  t | LSMEAN<br>Number |
|-------------|---------------------------|-------------------|---------|------------------|
| <b>CTCs</b> | 10358.9711                | 858.0215          | <.0001  | 1                |
| <b>Lymp</b> | 22286.9418                | 872.2046          | <.0001  | 2                |
| <b>Macr</b> | 12470.4814                | 1018.5155         | <.0001  | 3                |

| Least Squares Means for effect type<br>Pr >  t  for H0: LSMean(i)=LSMean(j) |        |        |        |
|-----------------------------------------------------------------------------|--------|--------|--------|
| Dependent Variable: AvIntallsignals                                         |        |        |        |
| i/j                                                                         | 1      | 2      | 3      |
| <b>1</b>                                                                    |        | <.0001 | 0.1168 |
| <b>2</b>                                                                    | <.0001 |        | <.0001 |
| <b>3</b>                                                                    | 0.1168 | <.0001 |        |

*The GLM Procedure*  
*Least Squares Means*

pt=16AA7266

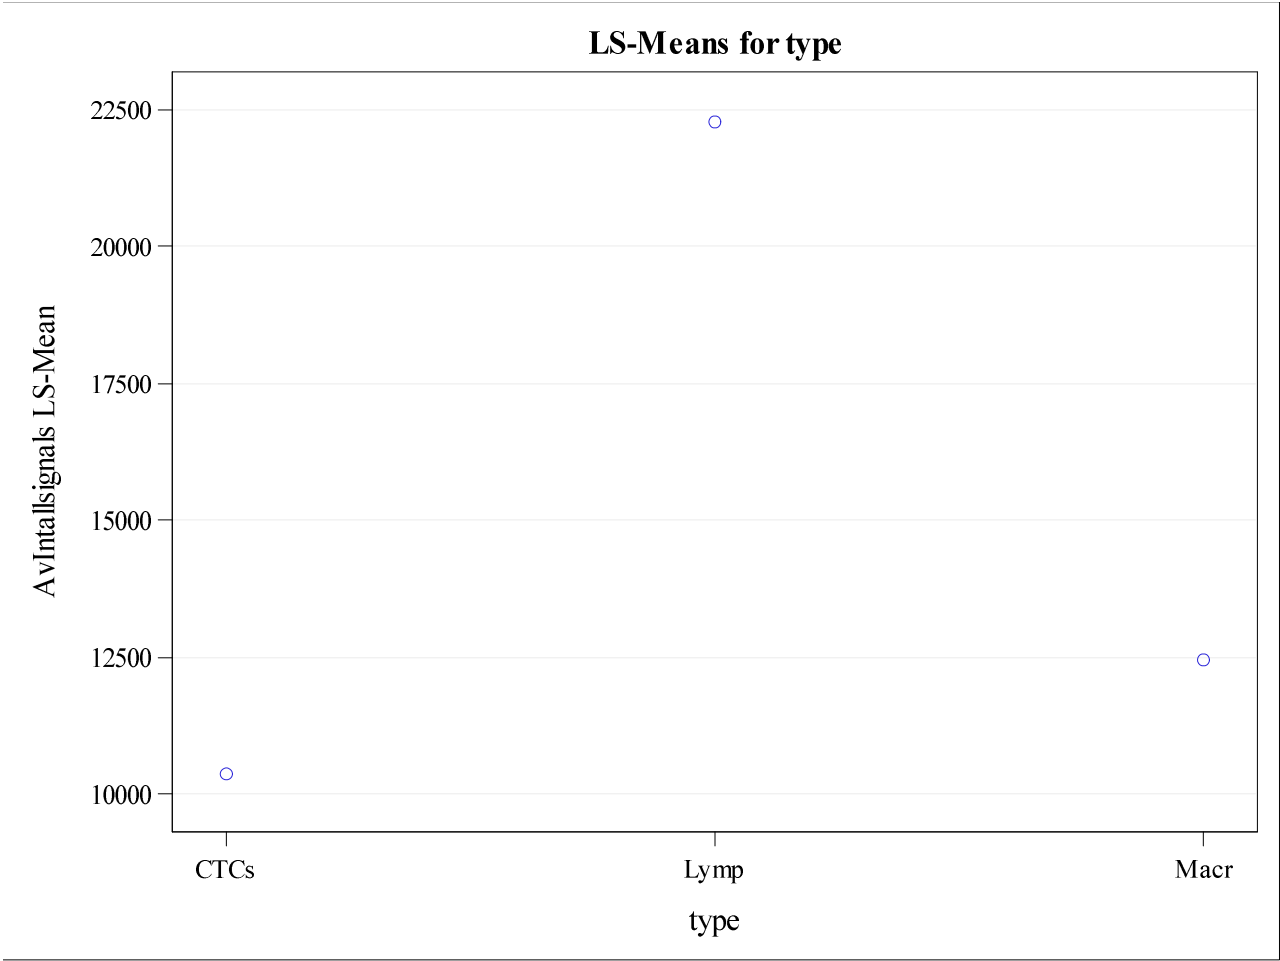

**The GLM Procedure**  
**Least Squares Means**

pt=16AA7266

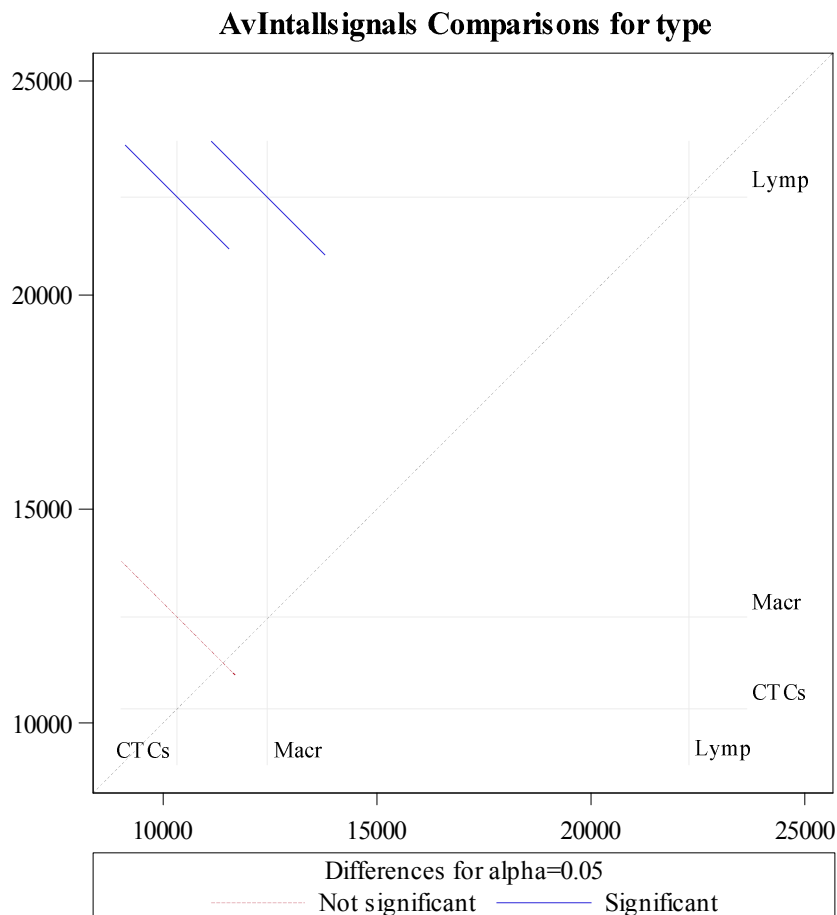

| type        | Totalintensity<br>LSMEAN | Standard<br>Error | Pr >  t | LSMEAN<br>Number |
|-------------|--------------------------|-------------------|---------|------------------|
| <b>CTCs</b> | 380375.419               | 32880.735         | <.0001  | 1                |
| <b>Lymp</b> | 511158.500               | 33424.255         | <.0001  | 2                |
| <b>Macr</b> | 230204.591               | 39031.121         | <.0001  | 3                |

| Least Squares Means for effect type<br>Pr >  t  for H0: LSMean(i)=LSMean(j) |        |        |        |
|-----------------------------------------------------------------------------|--------|--------|--------|
| Dependent Variable: Totalintensity                                          |        |        |        |
| i/j                                                                         | 1      | 2      | 3      |
| 1                                                                           |        | 0.0066 | 0.0043 |
| 2                                                                           | 0.0066 |        | <.0001 |
| 3                                                                           | 0.0043 | <.0001 |        |

*The GLM Procedure*  
*Least Squares Means*

pt=16AA7266

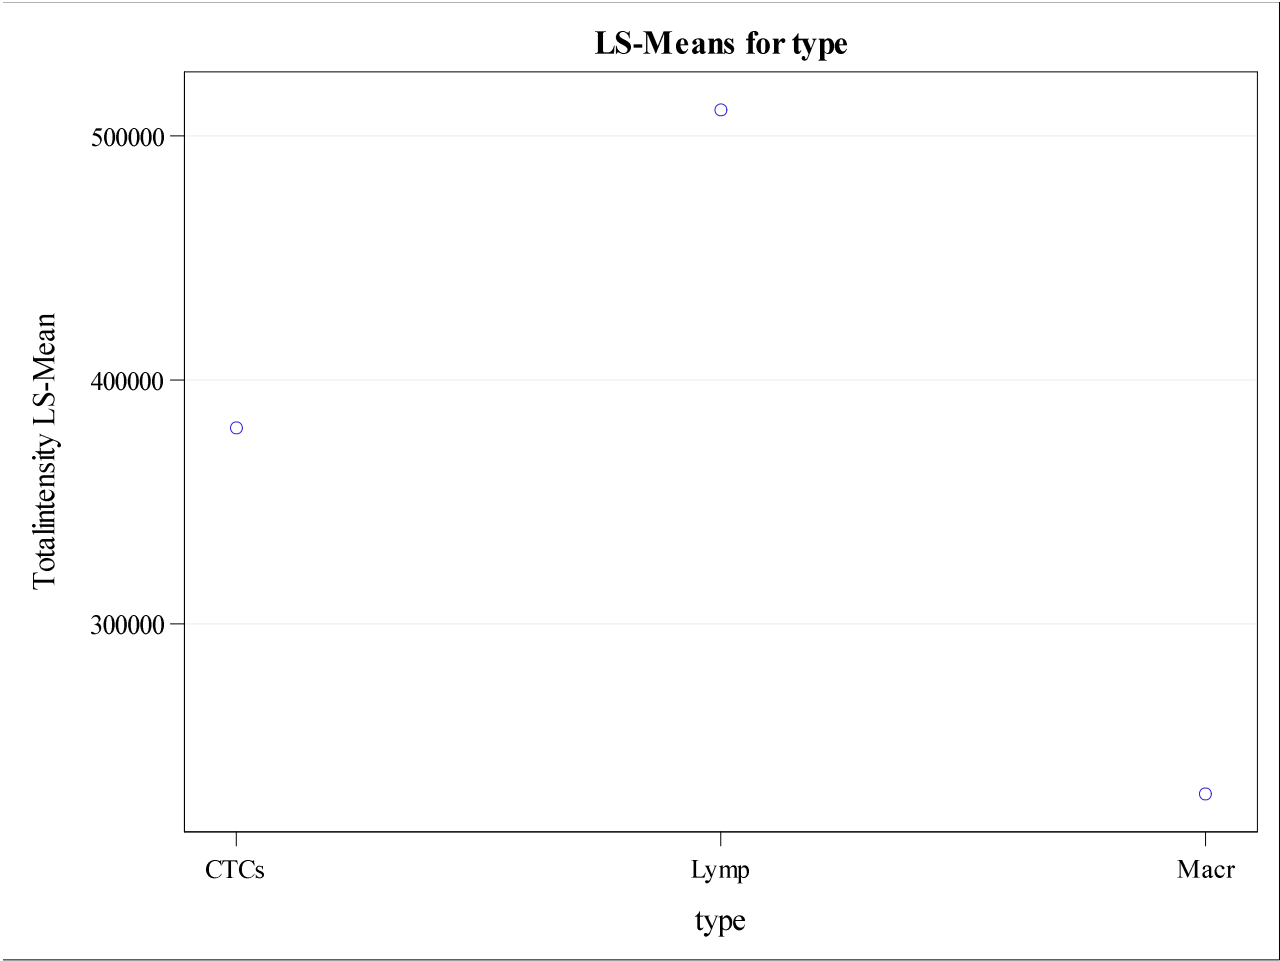

***The GLM Procedure***  
***Least Squares Means***

**pt=16AA7266**

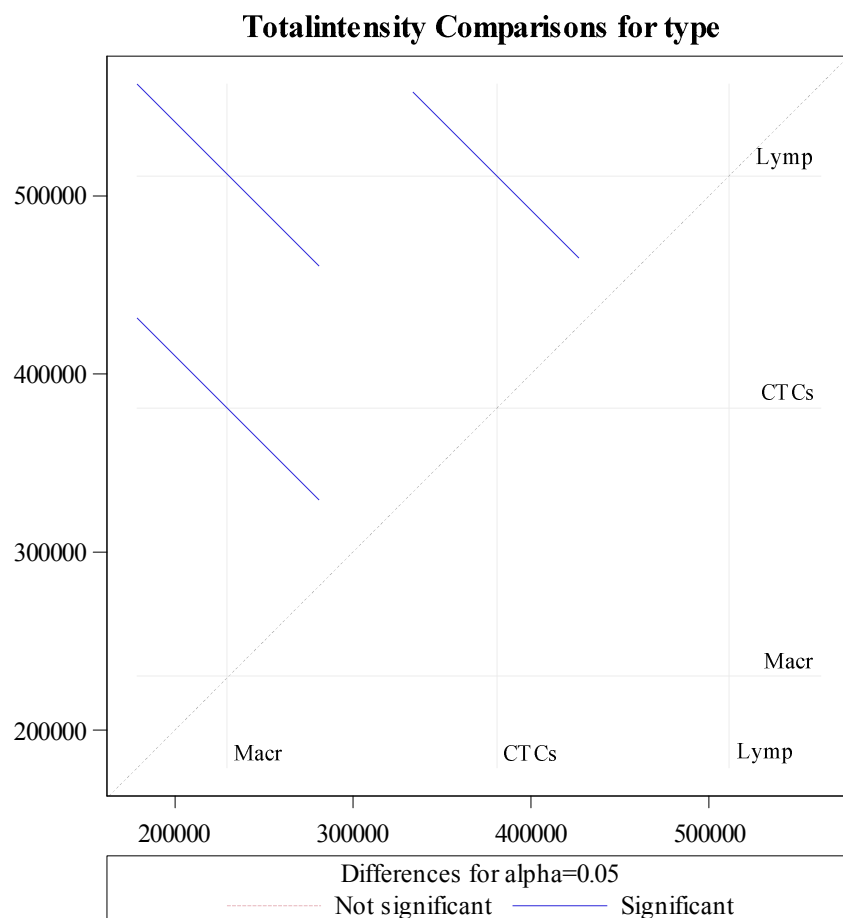

| type        | Nuclearvolume<br>LSMEAN | Standard<br>Error | Pr >  t | LSMEAN<br>Number |
|-------------|-------------------------|-------------------|---------|------------------|
| <b>CTCs</b> | 915436.161              | 43815.169         | <.0001  | 1                |
| <b>Lymp</b> | 154573.967              | 44539.436         | 0.0008  | 2                |
| <b>Macr</b> | 565345.727              | 52010.856         | <.0001  | 3                |

| Least Squares Means for effect type<br>Pr >  t  for H0: LSMean(i)=LSMean(j) |        |        |        |
|-----------------------------------------------------------------------------|--------|--------|--------|
| Dependent Variable: Nuclearvolume                                           |        |        |        |
| i/j                                                                         | 1      | 2      | 3      |
| 1                                                                           |        | <.0001 | <.0001 |
| 2                                                                           | <.0001 |        | <.0001 |
| 3                                                                           | <.0001 |        |        |



*The GLM Procedure*  
*Least Squares Means*

pt=16AA7266

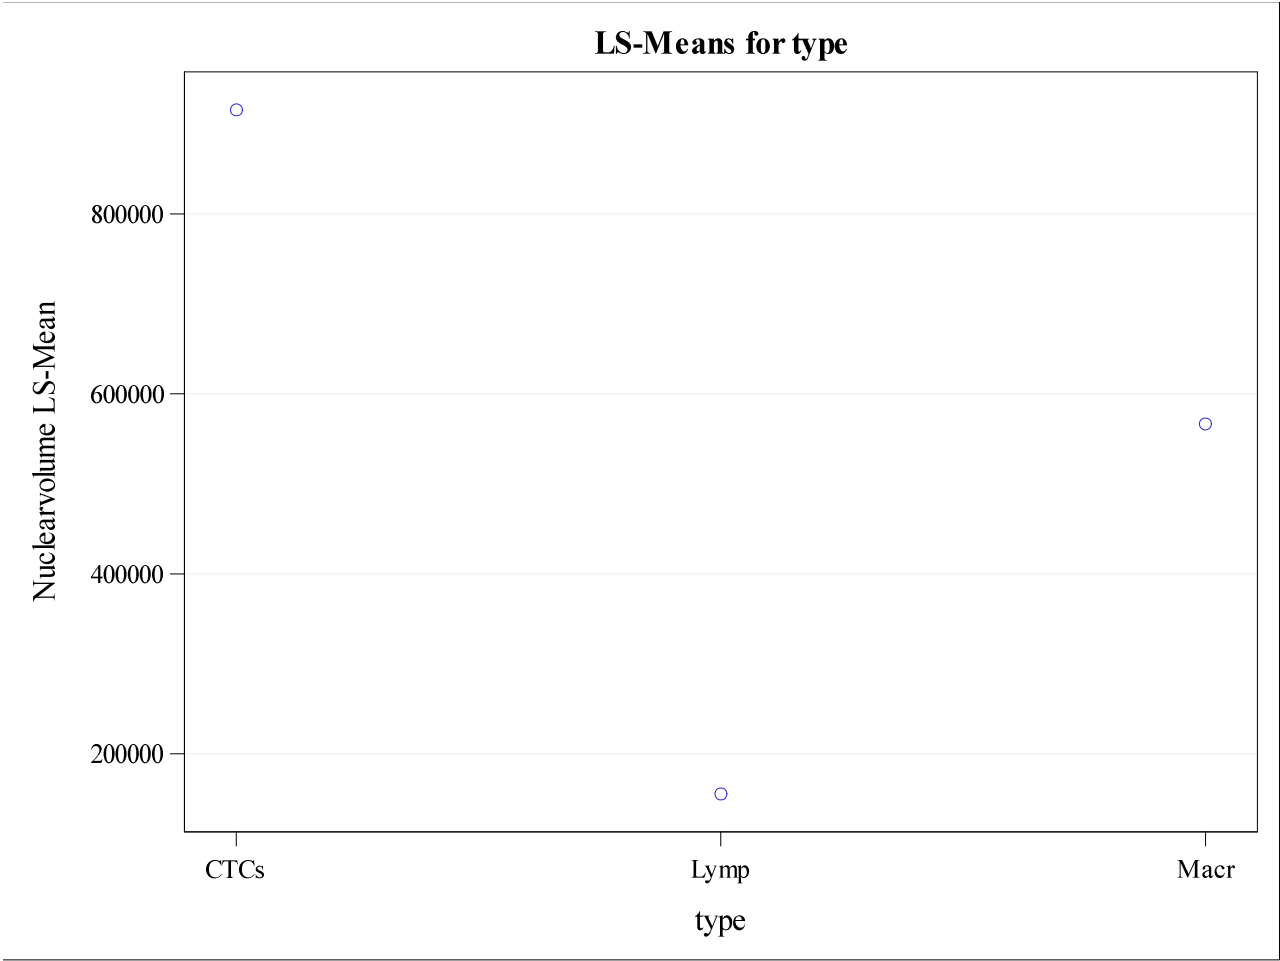

**The GLM Procedure**  
**Least Squares Means**

pt=16AA7266

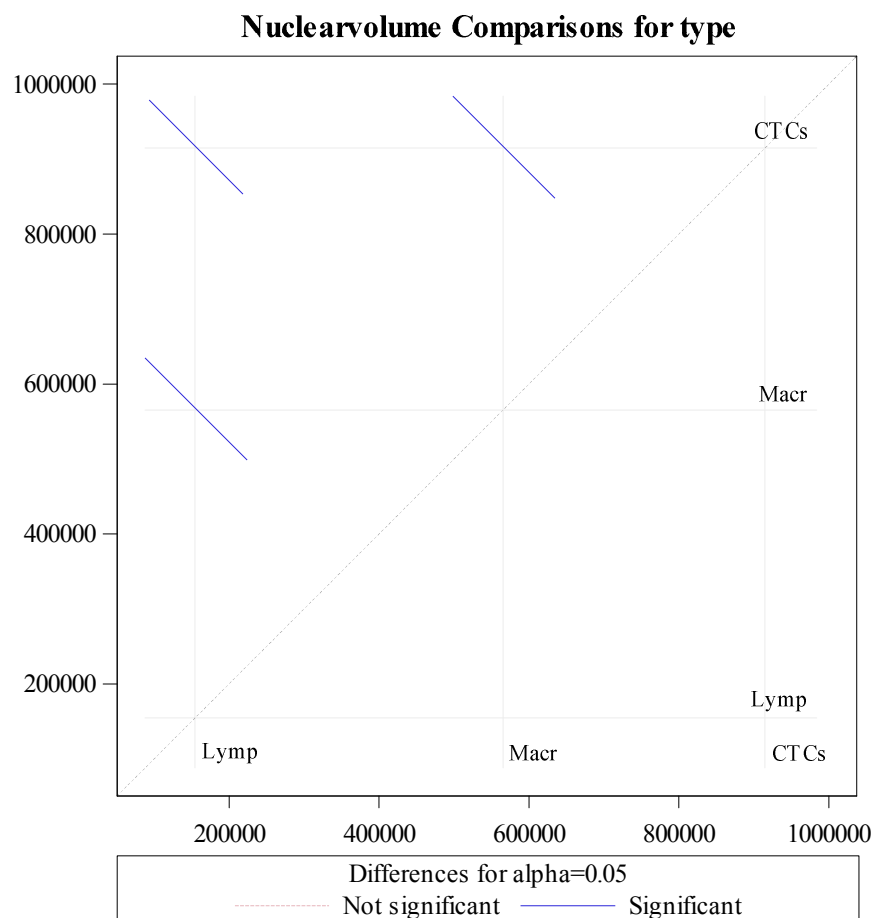

| type        | telomereperkvol<br>LSMEAN | Standard<br>Error | Pr >  t | LSMEAN<br>Number |
|-------------|---------------------------|-------------------|---------|------------------|
| <b>CTCs</b> | 0.04168861                | 0.00405012        | <.0001  | 1                |
| <b>Lymp</b> | 0.15118778                | 0.00411707        | <.0001  | 2                |
| <b>Macr</b> | 0.03421721                | 0.00480770        | <.0001  | 3                |

| Least Squares Means for effect type<br>Pr >  t  for H0: LSMean(i)=LSMean(j) |        |        |        |
|-----------------------------------------------------------------------------|--------|--------|--------|
| Dependent Variable: telomereperkvol                                         |        |        |        |
| i/j                                                                         | 1      | 2      | 3      |
| 1                                                                           |        | <.0001 | 0.2381 |
| 2                                                                           | <.0001 |        | <.0001 |
| 3                                                                           | 0.2381 | <.0001 |        |

*The GLM Procedure*  
*Least Squares Means*

pt=16AA7266

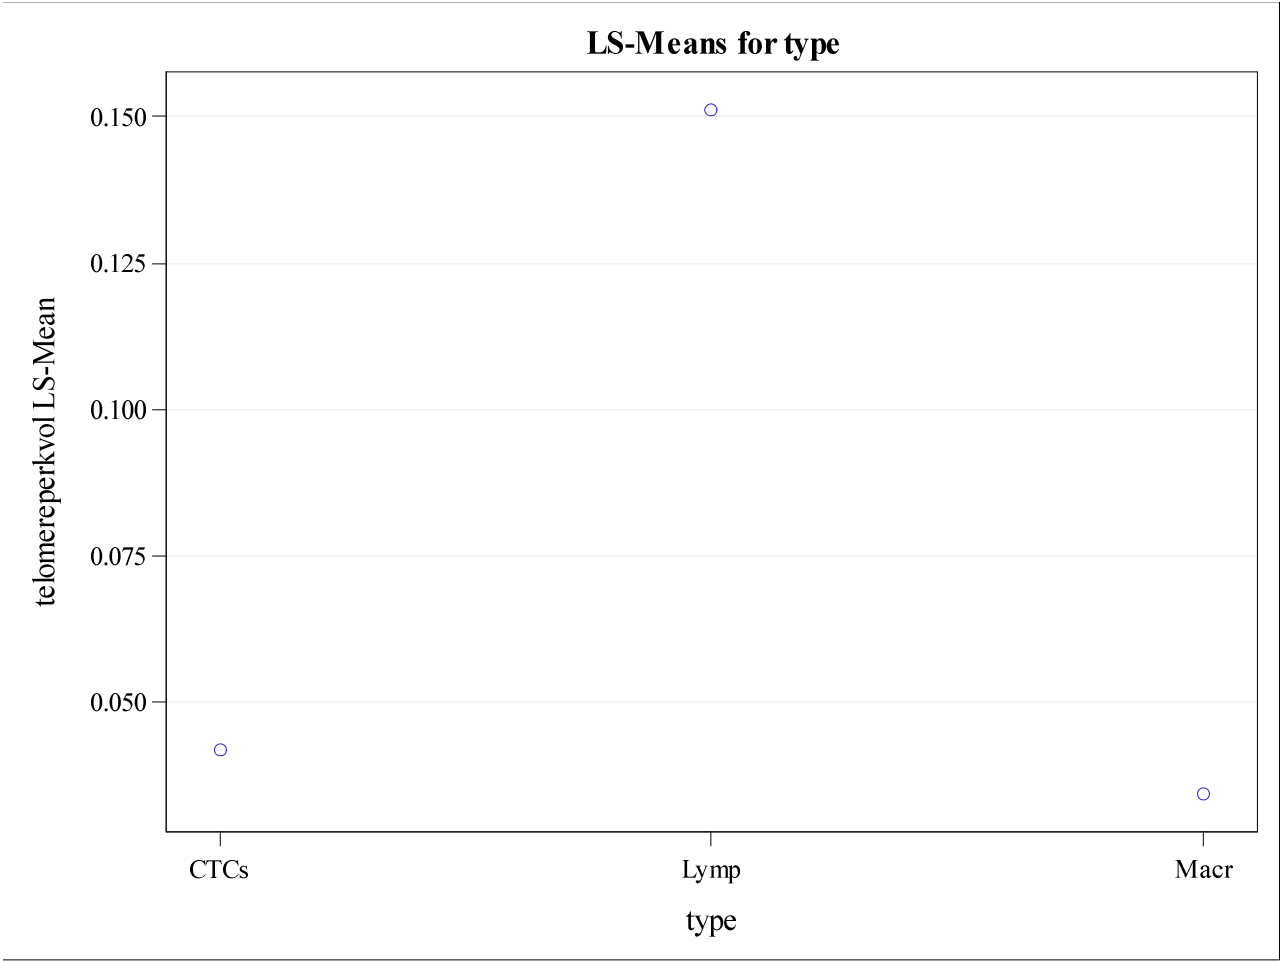

*The GLM Procedure*  
*Least Squares Means*

pt=16AA7266

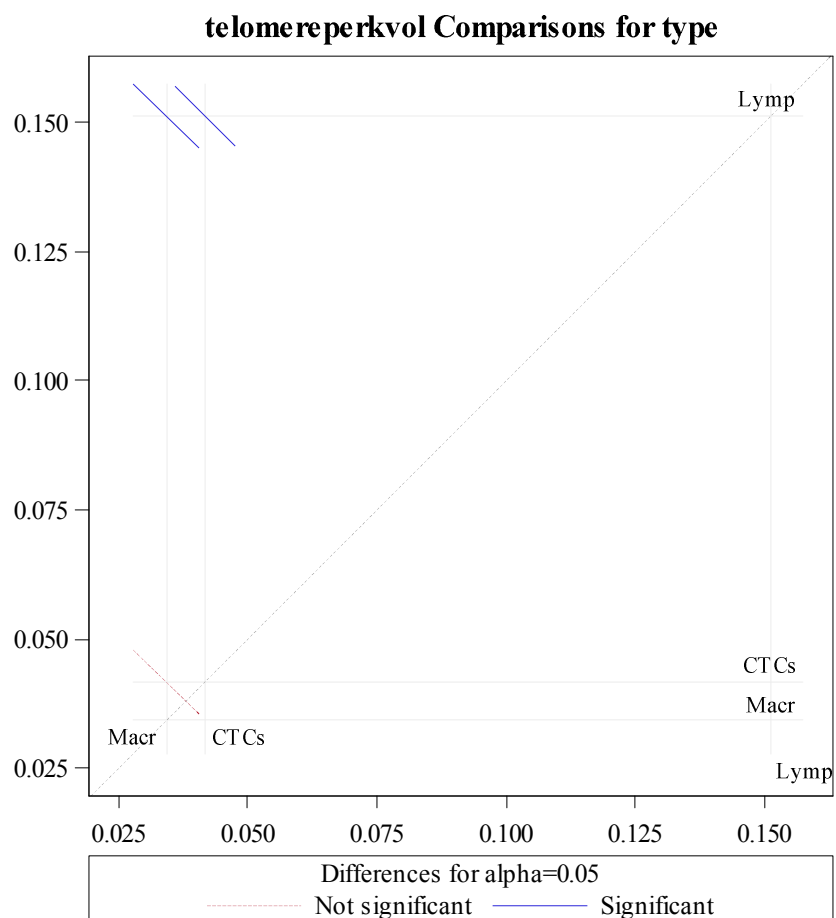

**Note:** To ensure overall protection level, only probabilities associated with pre-planned comparisons should be used.

***The GLM Procedure*****pt=16AA7280**

| Class Level Information |        |                 |
|-------------------------|--------|-----------------|
| Class                   | Levels | Values          |
| type                    | 3      | CTCs Lymph Macr |

|                             |    |
|-----------------------------|----|
| Number of Observations Read | 53 |
| Number of Observations Used | 53 |

**The GLM Procedure**

**Dependent Variable: Totalnofsignals**  
**Totalnofsignals**

**pt=16AA7280**

| Source                 | DF | Sum of Squares | Mean Square | F Value | Pr > F |
|------------------------|----|----------------|-------------|---------|--------|
| <b>Model</b>           | 2  | 223150.8243    | 111575.4121 | 27.31   | <.0001 |
| <b>Error</b>           | 50 | 204277.8927    | 4085.5579   |         |        |
| <b>Corrected Total</b> | 52 | 427428.7170    |             |         |        |

| R-Square | Coeff Var | Root MSE | Totalnofsignals Mean |
|----------|-----------|----------|----------------------|
| 0.522077 | 65.08499  | 63.91837 | 98.20755             |

| Source      | DF | Type III SS | Mean Square | F Value | Pr > F |
|-------------|----|-------------|-------------|---------|--------|
| <b>type</b> | 2  | 223150.8243 | 111575.4121 | 27.31   | <.0001 |

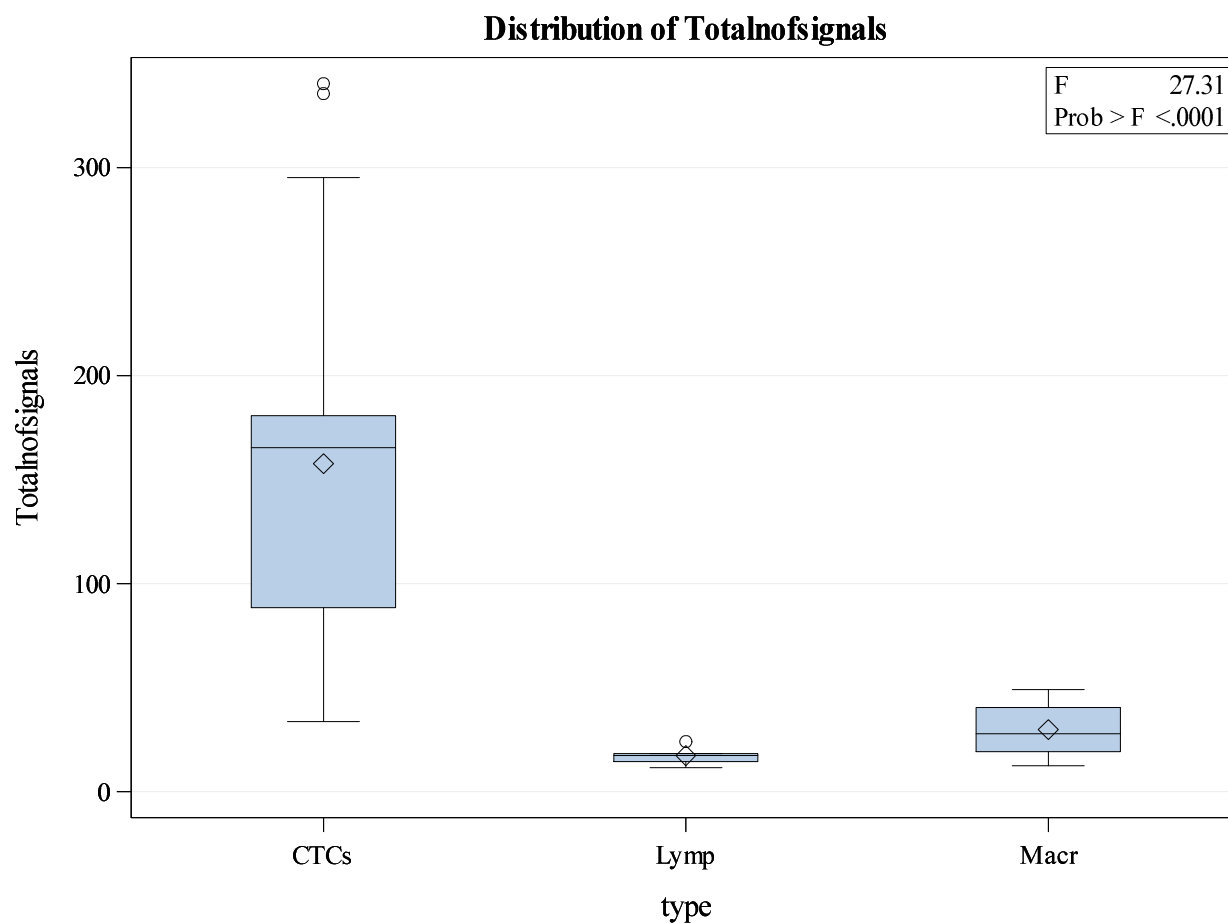

**The GLM Procedure****Dependent Variable: Totalnofaggregates Totalnofaggregates****pt=16AA7280**

| Source          | DF | Sum of Squares | Mean Square | F Value | Pr > F |
|-----------------|----|----------------|-------------|---------|--------|
| Model           | 2  | 3894.543628    | 1947.271814 | 22.63   | <.0001 |
| Error           | 50 | 4301.984674    | 86.039693   |         |        |
| Corrected Total | 52 | 8196.528302    |             |         |        |

| R-Square | Coeff Var | Root MSE | Totalnofaggregates Mean |
|----------|-----------|----------|-------------------------|
| 0.475146 | 77.91049  | 9.275758 | 11.90566                |

| Source | DF | Type III SS | Mean Square | F Value | Pr > F |
|--------|----|-------------|-------------|---------|--------|
| type   | 2  | 3894.543628 | 1947.271814 | 22.63   | <.0001 |

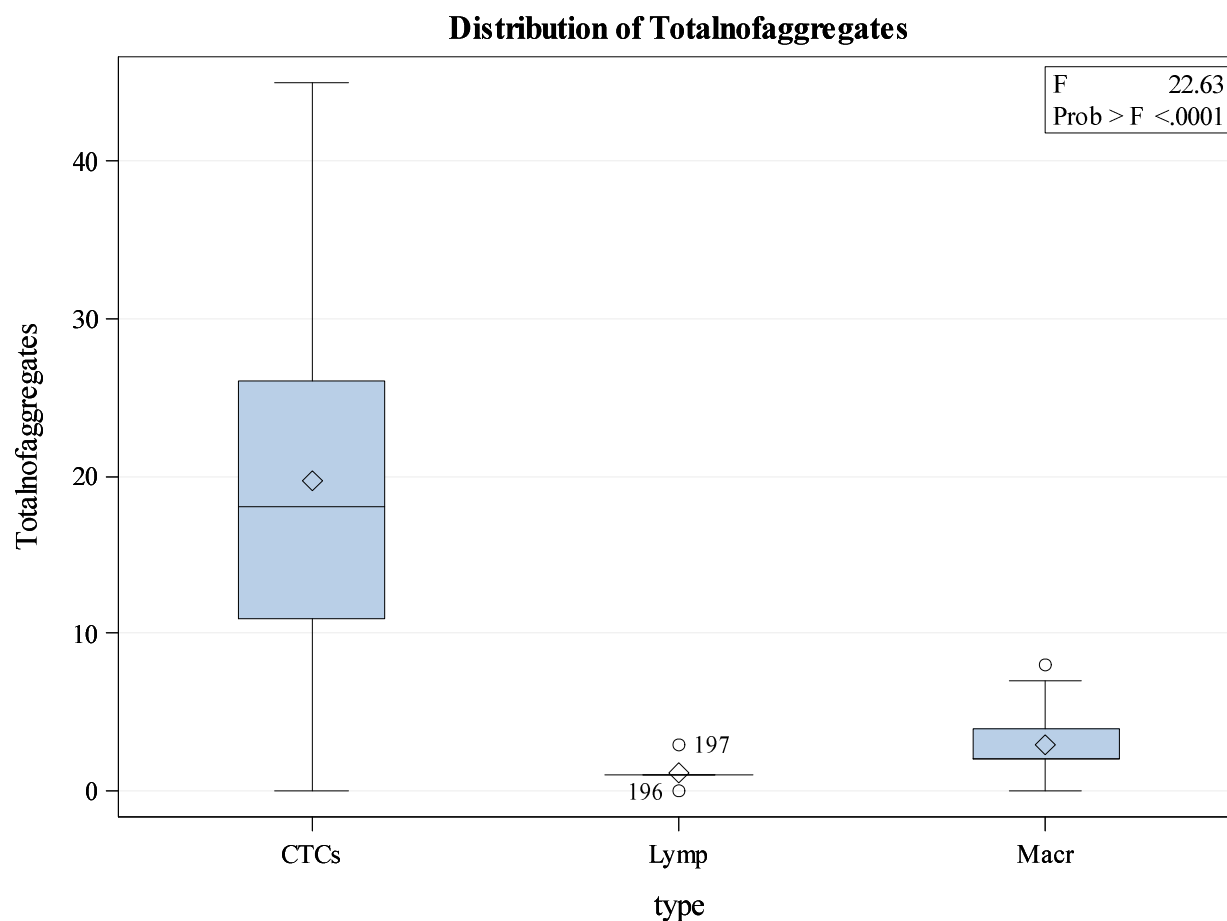

**The GLM Procedure**

**Dependent Variable: acratio**  
**acratio**

**pt=16AA7280**

| Source                 | DF | Sum of Squares | Mean Square | F Value | Pr > F |
|------------------------|----|----------------|-------------|---------|--------|
| <b>Model</b>           | 2  | 36.0506358     | 18.0253179  | 5.30    | 0.0082 |
| <b>Error</b>           | 50 | 170.1420984    | 3.4028420   |         |        |
| <b>Corrected Total</b> | 52 | 206.1927342    |             |         |        |

| R-Square | Coeff Var | Root MSE | acratio Mean |
|----------|-----------|----------|--------------|
| 0.174840 | 59.68891  | 1.844679 | 3.090489     |

| Source      | DF | Type III SS | Mean Square | F Value | Pr > F |
|-------------|----|-------------|-------------|---------|--------|
| <b>type</b> | 2  | 36.05063580 | 18.02531790 | 5.30    | 0.0082 |

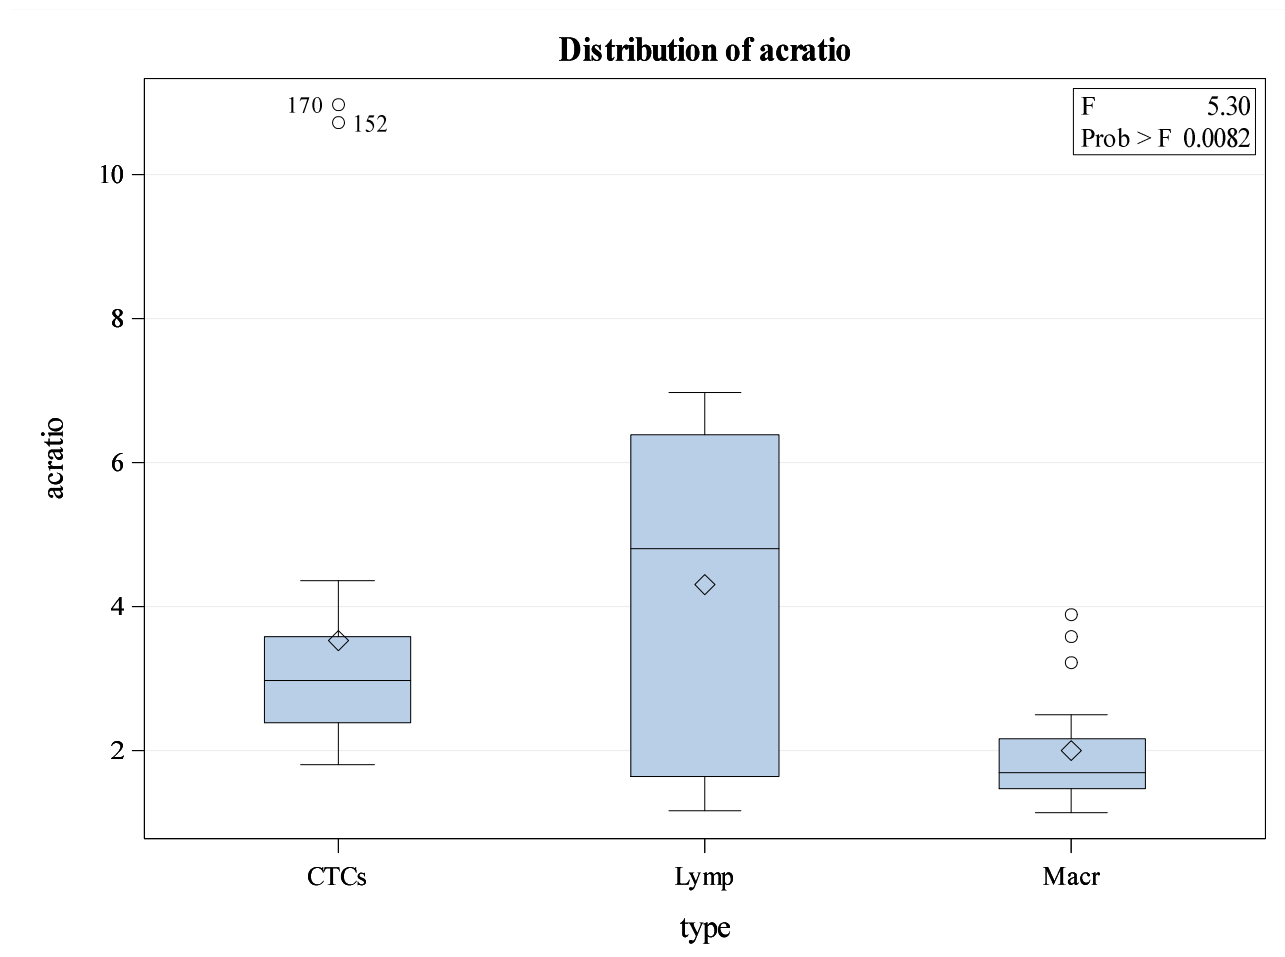



**The GLM Procedure**

**Dependent Variable: AvIntallsignals**  
**AvIntallsignals**

**pt=16AA7280**

| Source                 | DF | Sum of Squares | Mean Square | F Value | Pr > F |
|------------------------|----|----------------|-------------|---------|--------|
| <b>Model</b>           | 2  | 140068458.0    | 70034229.0  | 7.09    | 0.0019 |
| <b>Error</b>           | 50 | 493989122.5    | 9879782.4   |         |        |
| <b>Corrected Total</b> | 52 | 634057580.5    |             |         |        |

| R-Square | Coeff Var | Root MSE | AvIntallsignals Mean |
|----------|-----------|----------|----------------------|
| 0.220908 | 28.48851  | 3143.212 | 11033.26             |

| Source      | DF | Type III SS | Mean Square | F Value | Pr > F |
|-------------|----|-------------|-------------|---------|--------|
| <b>type</b> | 2  | 140068458.0 | 70034229.0  | 7.09    | 0.0019 |

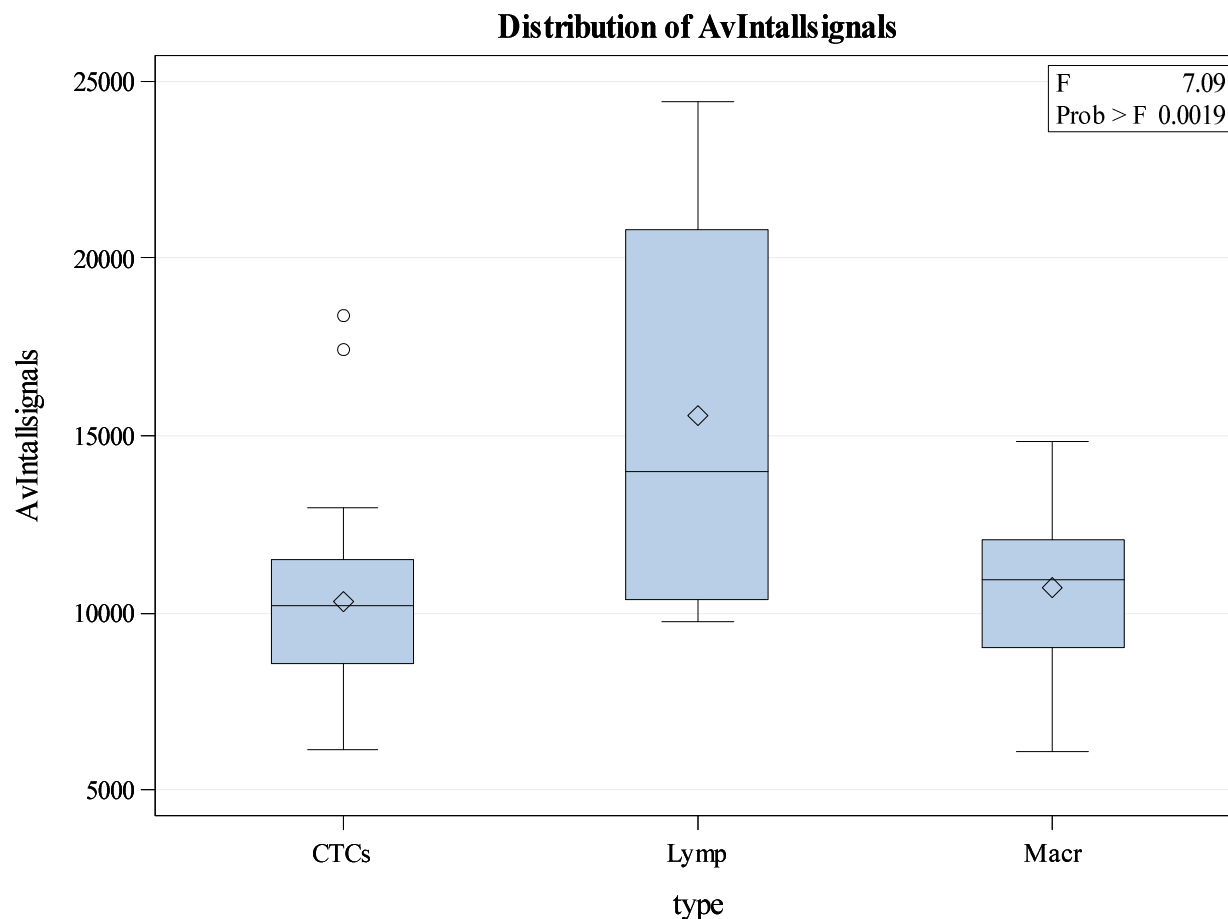

**The GLM Procedure**

**Dependent Variable: Totalintensity**  
**Totalintensity**

**pt=16AA7280**

| Source                 | DF | Sum of Squares | Mean Square  | F Value | Pr > F |
|------------------------|----|----------------|--------------|---------|--------|
| <b>Model</b>           | 2  | 2.0086564E13   | 1.0043282E13 | 24.20   | <.0001 |
| <b>Error</b>           | 50 | 2.075341E13    | 415068207694 |         |        |
| <b>Corrected Total</b> | 52 | 4.0839974E13   |              |         |        |

| R-Square | Coeff Var | Root MSE | Totalintensity Mean |
|----------|-----------|----------|---------------------|
| 0.491836 | 65.26882  | 644257.9 | 987083.7            |

| Source      | DF | Type III SS  | Mean Square  | F Value | Pr > F |
|-------------|----|--------------|--------------|---------|--------|
| <b>type</b> | 2  | 2.0086564E13 | 1.0043282E13 | 24.20   | <.0001 |

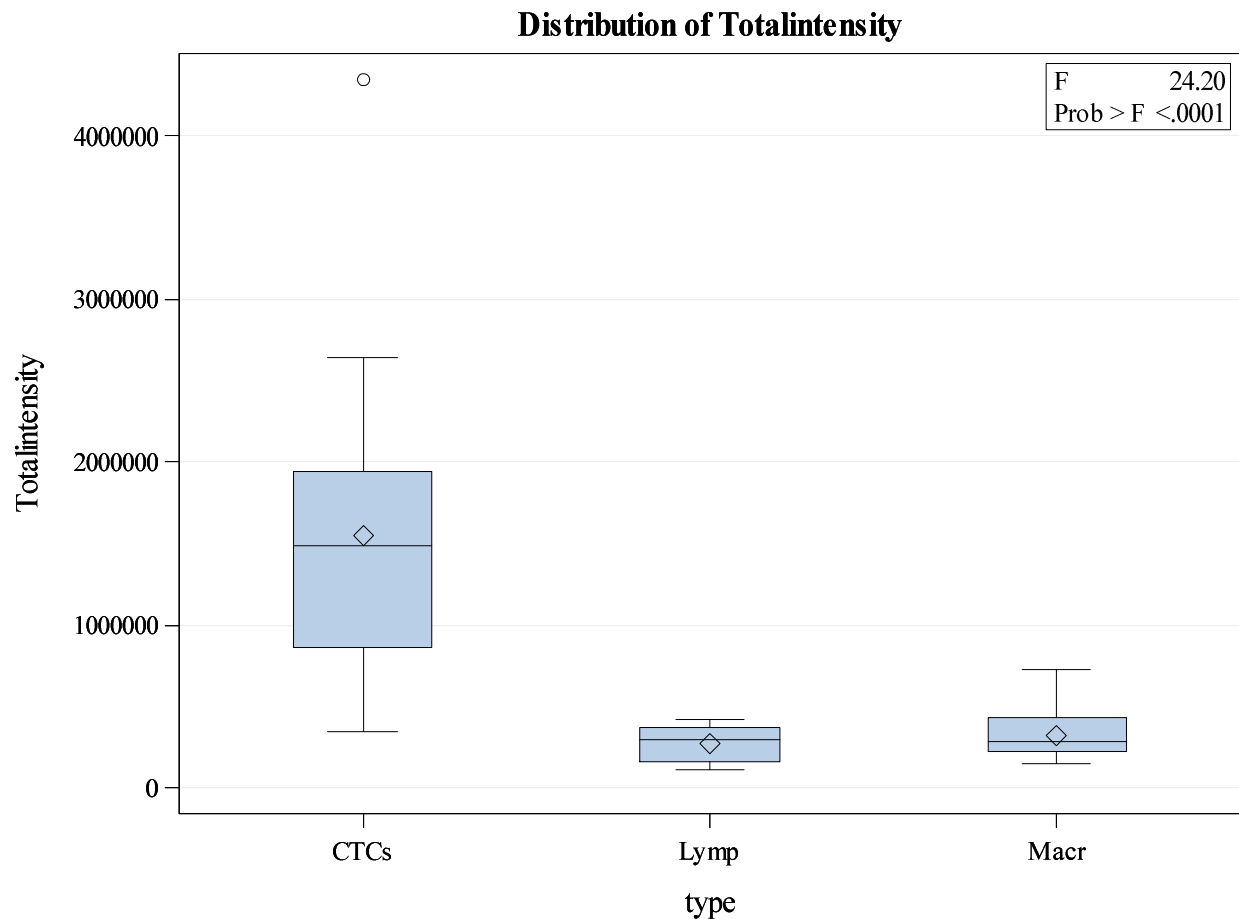

**The GLM Procedure**

**Dependent Variable: Nuclearvolume**  
**Nuclearvolume**

**pt=16AA7280**

| Source                 | DF | Sum of Squares | Mean Square  | F Value | Pr > F |
|------------------------|----|----------------|--------------|---------|--------|
| <b>Model</b>           | 2  | 1.2415263E13   | 6.2076315E12 | 25.23   | <.0001 |
| <b>Error</b>           | 50 | 1.2302323E13   | 246046468818 |         |        |
| <b>Corrected Total</b> | 52 | 2.4717586E13   |              |         |        |

| R-Square | Coeff Var | Root MSE | Nuclearvolume Mean |
|----------|-----------|----------|--------------------|
| 0.502285 | 58.88673  | 496030.7 | 842347.1           |

| Source      | DF | Type III SS  | Mean Square  | F Value | Pr > F |
|-------------|----|--------------|--------------|---------|--------|
| <b>type</b> | 2  | 1.2415263E13 | 6.2076315E12 | 25.23   | <.0001 |

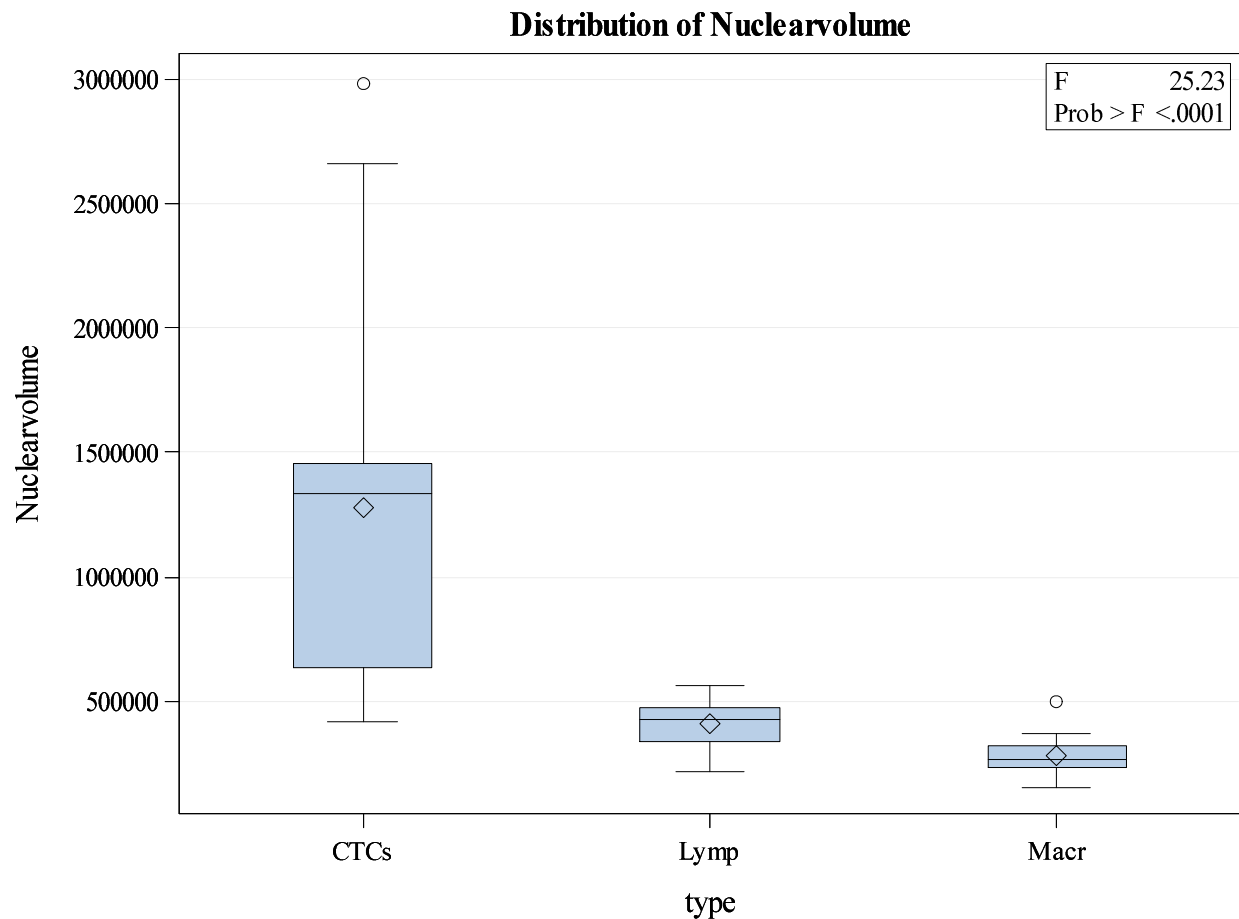

**The GLM Procedure****Dependent Variable: telomereperkvol****pt=16AA7280**

| Source                 | DF | Sum of Squares | Mean Square | F Value | Pr > F |
|------------------------|----|----------------|-------------|---------|--------|
| <b>Model</b>           | 2  | 0.02760431     | 0.01380216  | 14.46   | <.0001 |
| <b>Error</b>           | 50 | 0.04772167     | 0.00095443  |         |        |
| <b>Corrected Total</b> | 52 | 0.07532598     |             |         |        |

| R-Square | Coeff Var | Root MSE | telomereperkvol Mean |
|----------|-----------|----------|----------------------|
| 0.366465 | 28.06963  | 0.030894 | 0.110062             |

| Source      | DF | Type III SS | Mean Square | F Value | Pr > F |
|-------------|----|-------------|-------------|---------|--------|
| <b>type</b> | 2  | 0.02760431  | 0.01380216  | 14.46   | <.0001 |

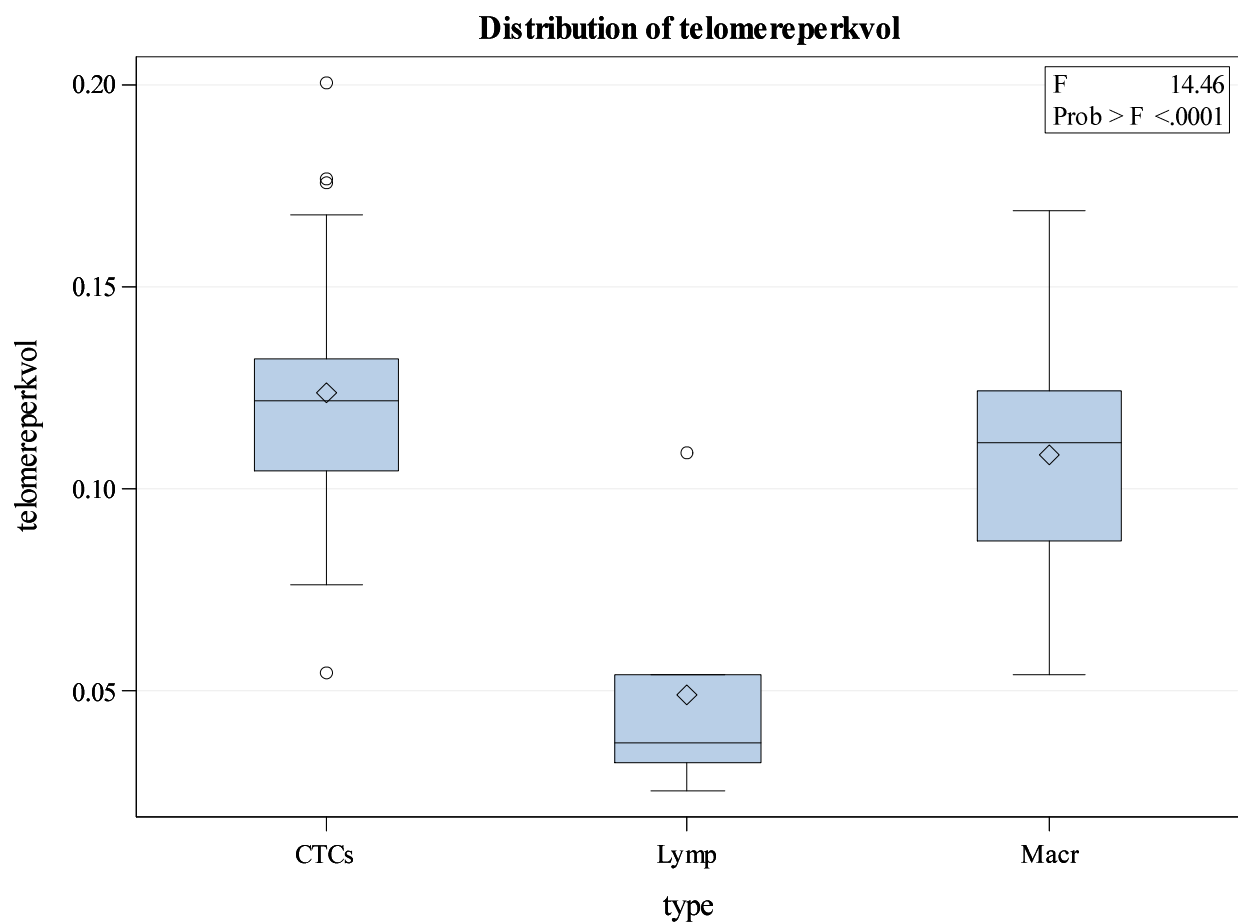

**The GLM Procedure**  
**Least Squares Means**

**pt=16AA7280**

| type        | Totalnofsignals<br>LSMEAN | Standard<br>Error | Pr >  t | LSMEAN<br>Number |
|-------------|---------------------------|-------------------|---------|------------------|
| <b>CTCs</b> | 157.137931                | 11.869343         | <.0001  | 1                |
| <b>Lymp</b> | 17.333333                 | 26.094565         | 0.5096  | 2                |
| <b>Macr</b> | 30.222222                 | 15.065704         | 0.0503  | 3                |

| Least Squares Means for effect type<br>Pr >  t  for H0: LSMean(i)=LSMean(j) |        |        |        |
|-----------------------------------------------------------------------------|--------|--------|--------|
| Dependent Variable: Totalnofsignals                                         |        |        |        |
| i/j                                                                         | 1      | 2      | 3      |
| 1                                                                           |        | <.0001 | <.0001 |
| 2                                                                           | <.0001 |        | 0.6707 |
| 3                                                                           | <.0001 | 0.6707 |        |

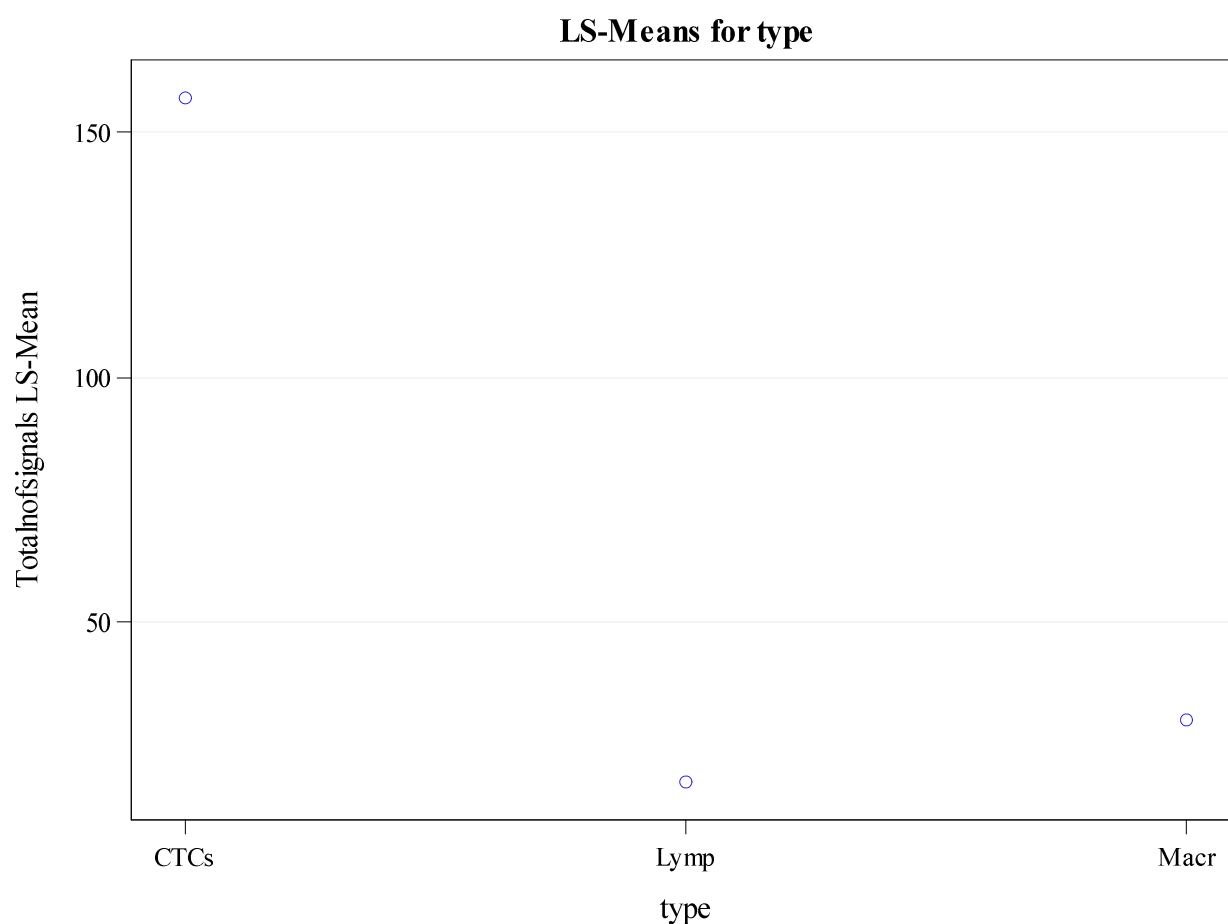

*The GLM Procedure*  
*Least Squares Means*

pt=16AA7280

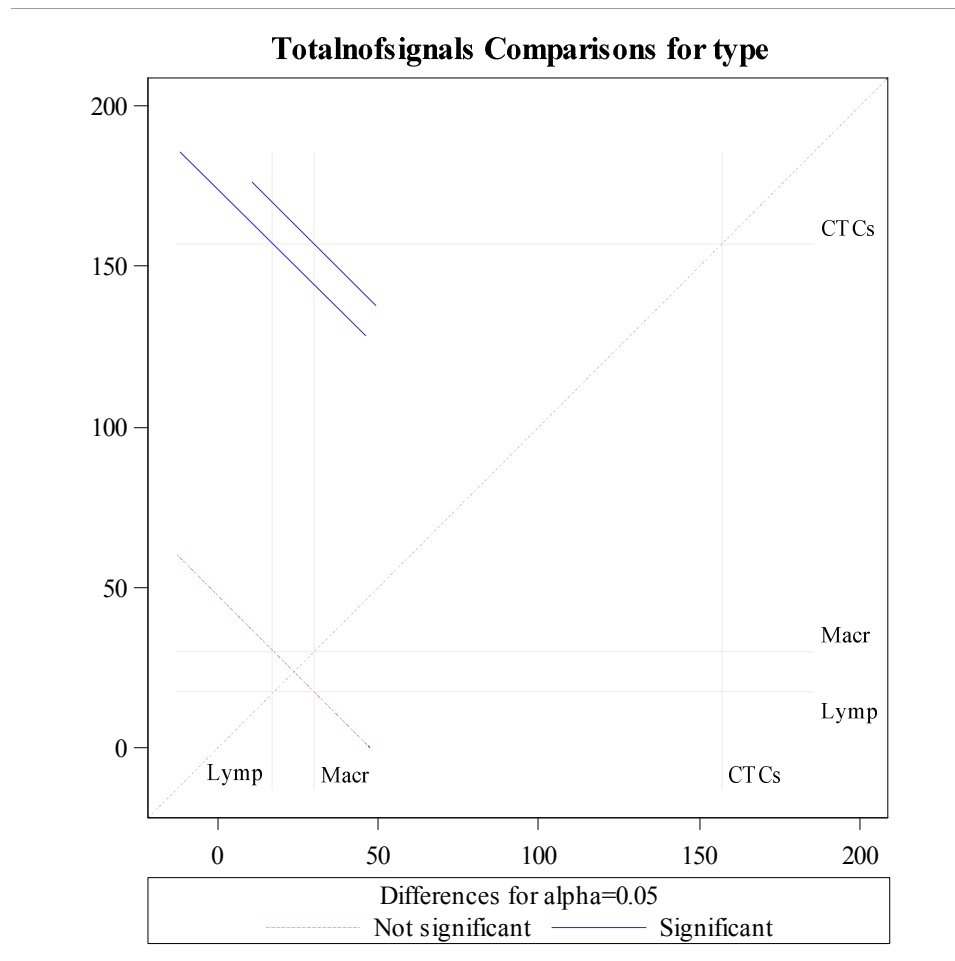

| type        | Totalnofaggregates<br>LSMEAN | Standard<br>Error | Pr >  t | LSMEAN<br>Number |
|-------------|------------------------------|-------------------|---------|------------------|
| <b>CTCs</b> | 19.6896552                   | 1.7224651         | <.0001  | 1                |
| <b>Lymp</b> | 1.1666667                    | 3.7868125         | 0.7593  | 2                |
| <b>Macr</b> | 2.9444444                    | 2.1863172         | 0.1841  | 3                |

*The GLM Procedure*  
*Least Squares Means*

pt=16AA7280

| Least Squares Means for effect type<br>Pr >  t  for H0: LSMean(i)=LSMean(j) |        |        |        |
|-----------------------------------------------------------------------------|--------|--------|--------|
| Dependent Variable: Totalnofaggregates                                      |        |        |        |
| i/j                                                                         | 1      | 2      | 3      |
| 1                                                                           |        | <.0001 | <.0001 |
| 2                                                                           | <.0001 |        | 0.6861 |
| 3                                                                           | <.0001 | 0.6861 |        |

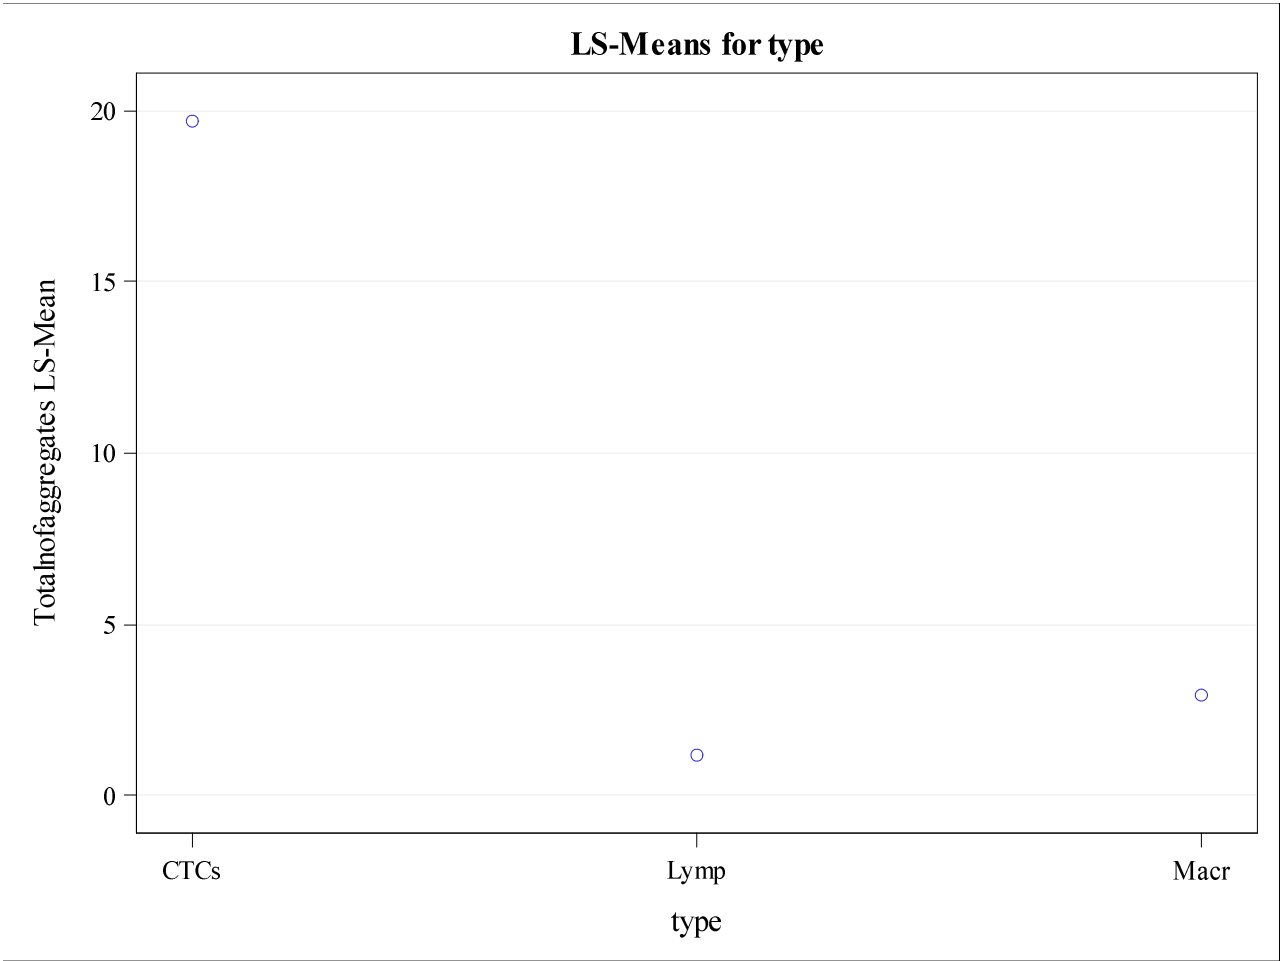

**The GLM Procedure**  
**Least Squares Means**

pt=16AA7280

**Totalnofaggagates Comparisons for type**

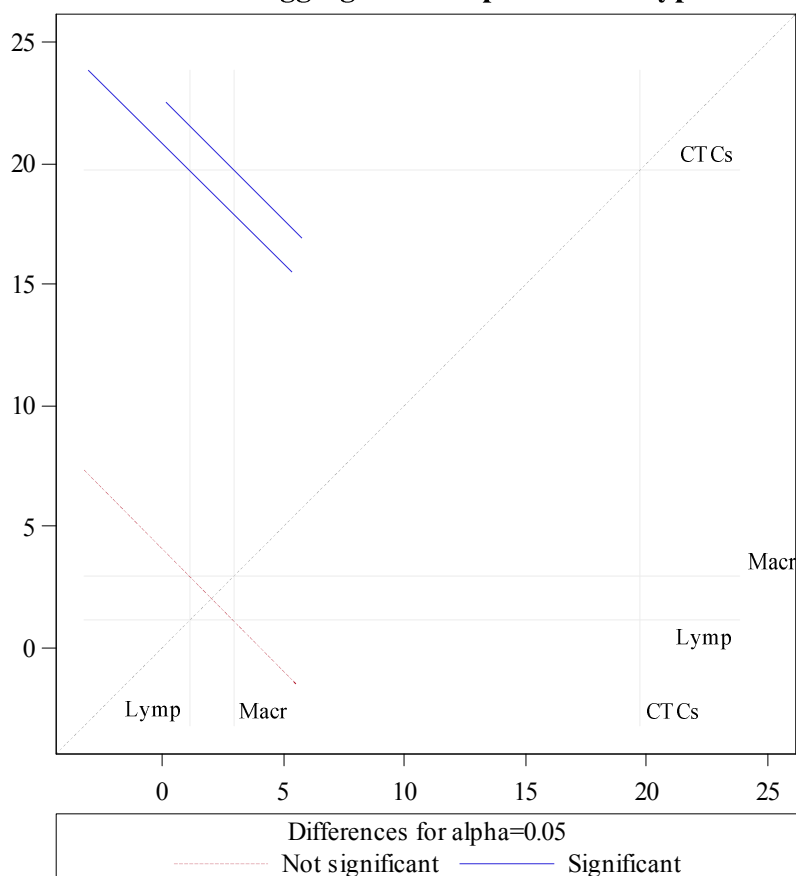

| type         | acratio<br>LSMEAN | Standard<br>Error | Pr >  t | LSMEAN<br>Number |
|--------------|-------------------|-------------------|---------|------------------|
| <b>CTCs</b>  | 3.52720517        | 0.34254836        | <.0001  | 1                |
| <b>Lymph</b> | 4.28893344        | 0.75308720        | <.0001  | 2                |
| <b>Macr</b>  | 1.98740967        | 0.43479510        | <.0001  | 3                |

| Least Squares Means for effect type<br>Pr >  t  for H0: LSMean(i)=LSMean(j) |        |        |        |
|-----------------------------------------------------------------------------|--------|--------|--------|
| Dependent Variable: acratio                                                 |        |        |        |
| i/j                                                                         | 1      | 2      | 3      |
| 1                                                                           |        | 0.3616 | 0.0076 |
| 2                                                                           | 0.3616 |        | 0.0108 |
| 3                                                                           | 0.0076 | 0.0108 |        |



*The GLM Procedure*  
*Least Squares Means*

pt=16AA7280

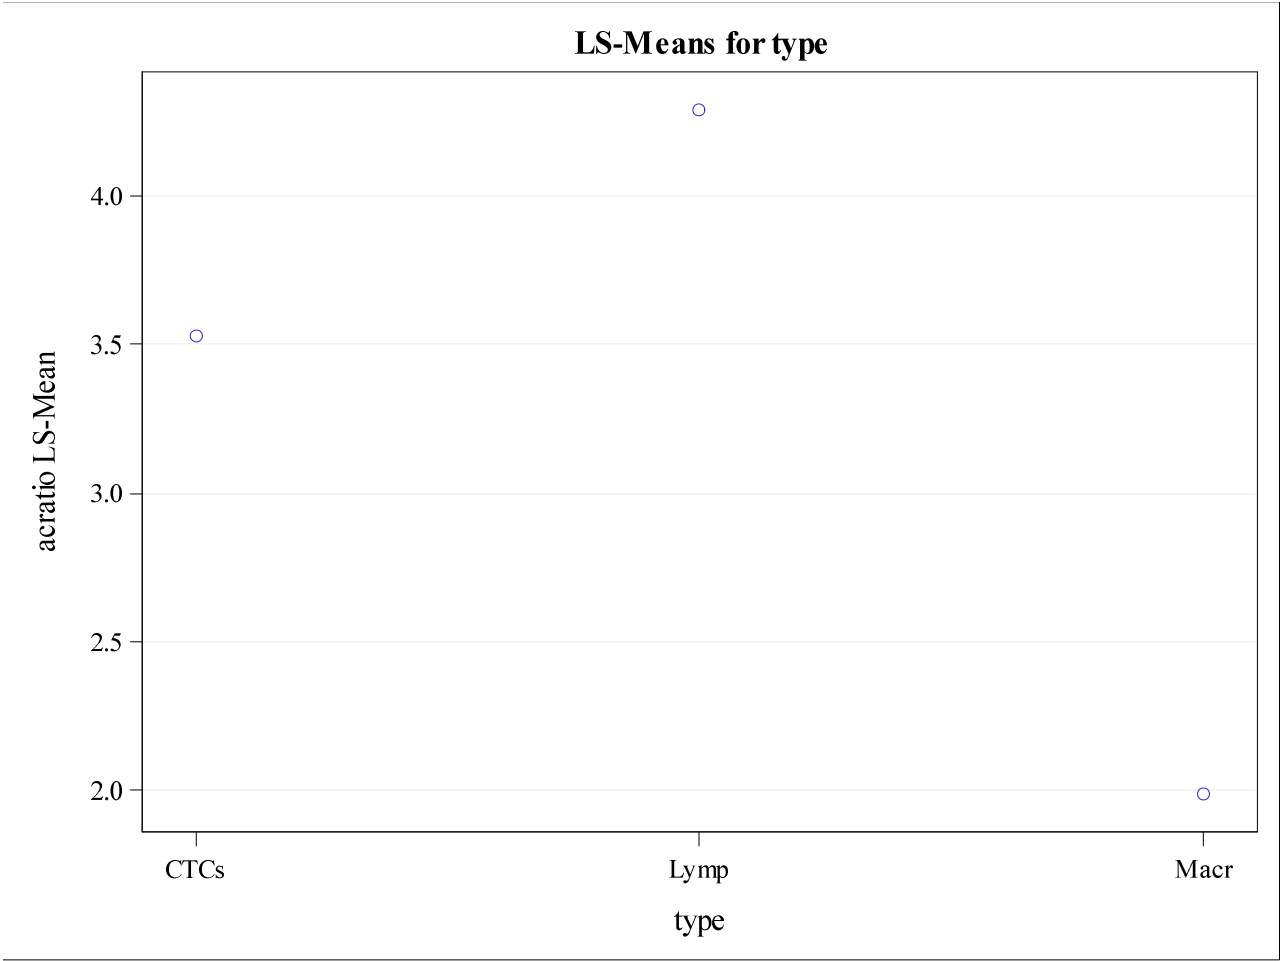

*The GLM Procedure*  
*Least Squares Means*

pt=16AA7280

acratio Comparisons for type

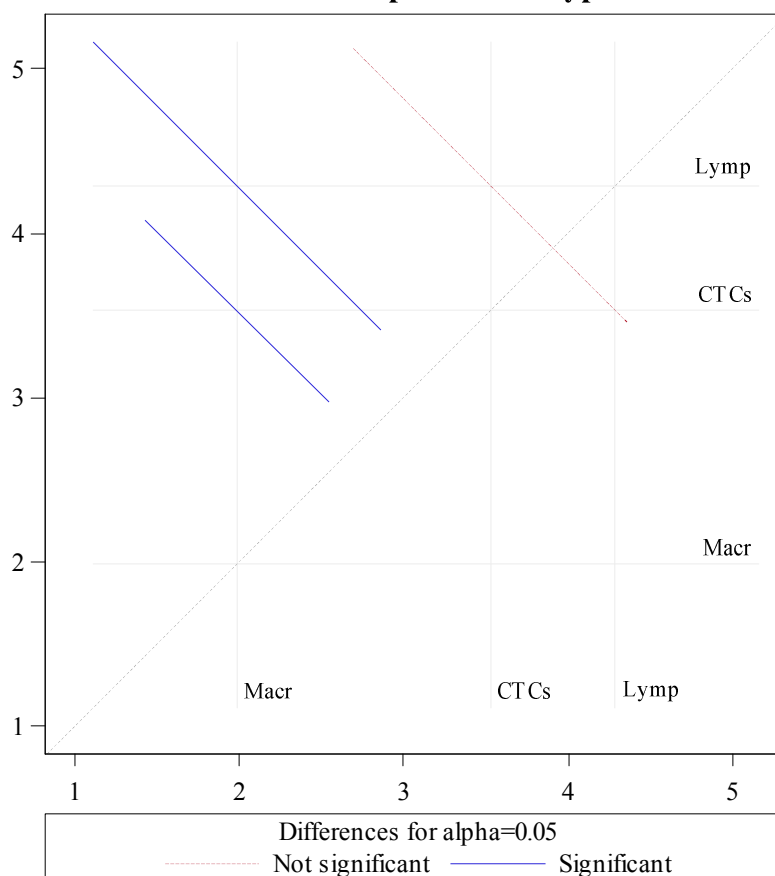

| type | AvIntallsignals<br>LSMEAN | Standard<br>Error | Pr >  t | LSMEAN<br>Number |
|------|---------------------------|-------------------|---------|------------------|
| CTCs | 10310.4806                | 583.6798          | <.0001  | 1                |
| Lymp | 15557.1750                | 1283.2110         | <.0001  | 2                |
| Macr | 10689.7710                | 740.8622          | <.0001  | 3                |

| Least Squares Means for effect type<br>Pr >  t  for H0: LSMean(i)=LSMean(j) |        |        |        |
|-----------------------------------------------------------------------------|--------|--------|--------|
| Dependent Variable: AvIntallsignals                                         |        |        |        |
| i/j                                                                         | 1      | 2      | 3      |
| 1                                                                           |        | 0.0005 | 0.6893 |
| 2                                                                           | 0.0005 |        | 0.0019 |
| 3                                                                           | 0.6893 | 0.0019 |        |

*The GLM Procedure*  
*Least Squares Means*

pt=16AA7280

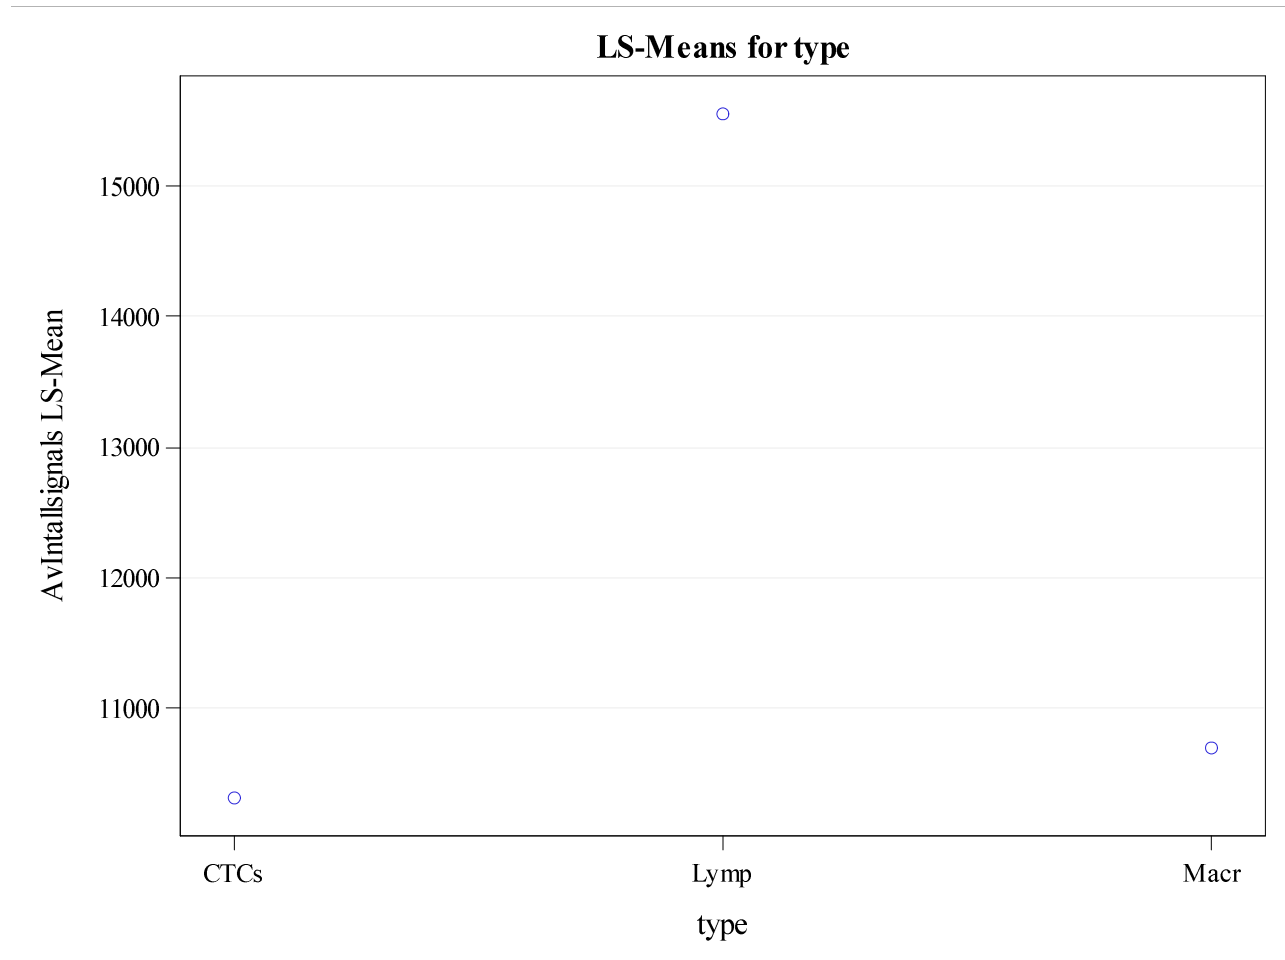

***The GLM Procedure***  
***Least Squares Means***

**pt=16AA7280**

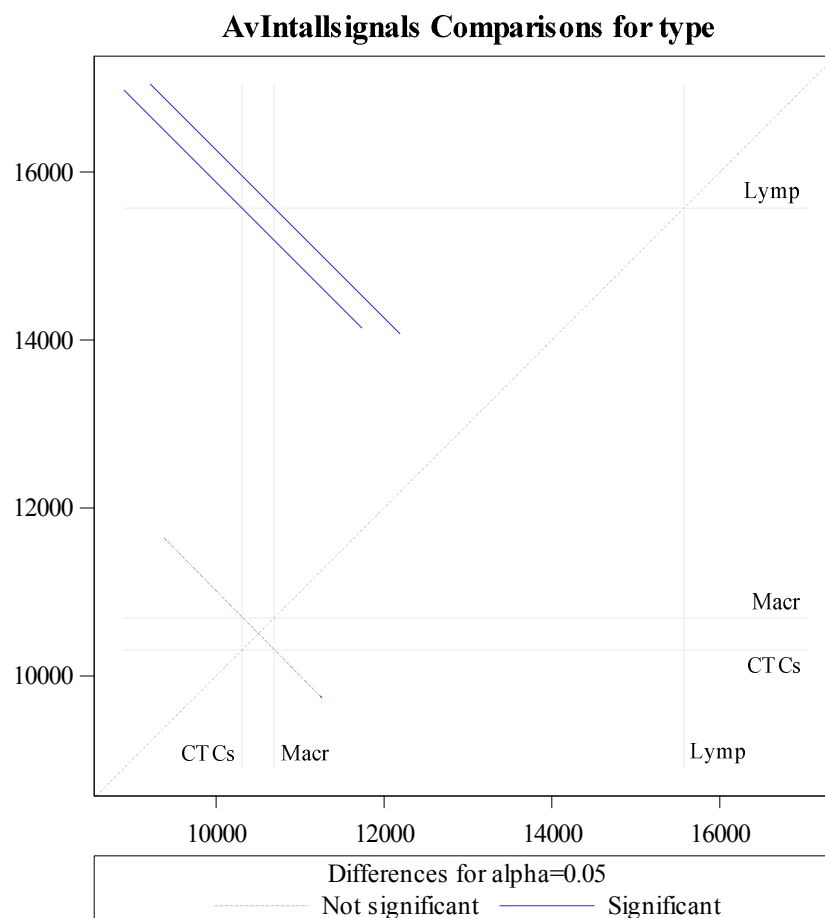

| type        | Totalintensity<br>LSMEAN | Standard<br>Error | Pr >  t | LSMEAN<br>Number |
|-------------|--------------------------|-------------------|---------|------------------|
| <b>CTCs</b> | 1546991.45               | 119635.68         | <.0001  | 1                |
| <b>Lymp</b> | 275688.67                | 263017.18         | 0.2996  | 2                |
| <b>Macr</b> | 322141.67                | 151853.04         | 0.0389  | 3                |

| Least Squares Means for effect type<br>Pr >  t  for H0: LSMean(i)=LSMean(j) |        |        |        |
|-----------------------------------------------------------------------------|--------|--------|--------|
| Dependent Variable: Totalintensity                                          |        |        |        |
| i/j                                                                         | 1      | 2      | 3      |
| 1                                                                           |        | <.0001 | <.0001 |
| 2                                                                           | <.0001 |        | 0.8791 |
| 3                                                                           | <.0001 | 0.8791 |        |

*The GLM Procedure*  
*Least Squares Means*

pt=16AA7280

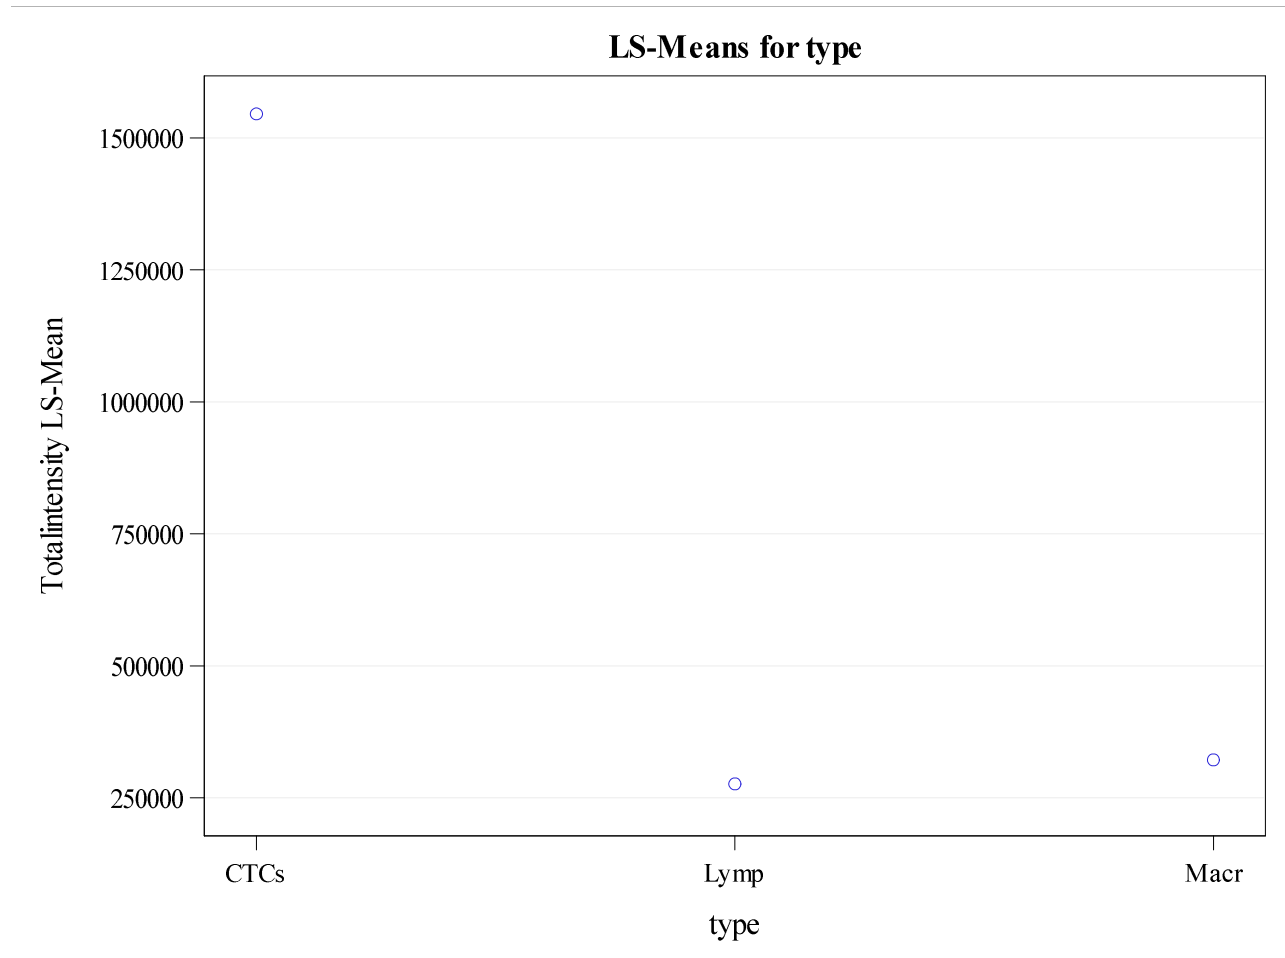

**The GLM Procedure**  
**Least Squares Means**

pt=16AA7280

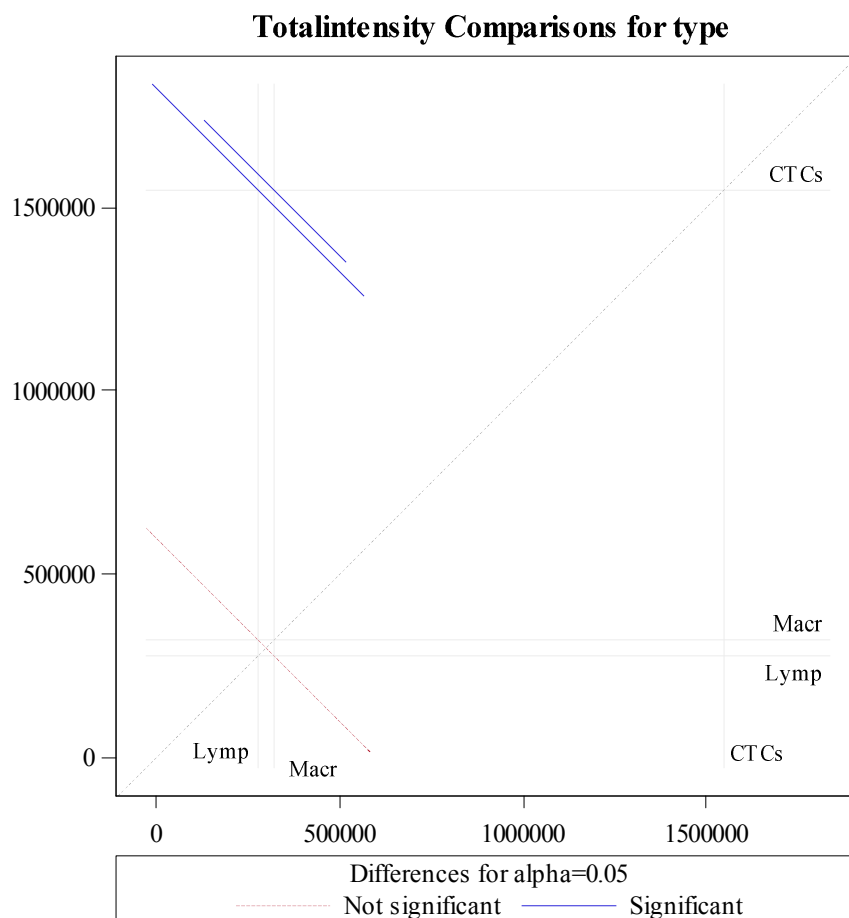

| type        | Nuclearvolume<br>LSMEAN | Standard<br>Error | Pr >  t | LSMEAN<br>Number |
|-------------|-------------------------|-------------------|---------|------------------|
| <b>CTCs</b> | 1281357.52              | 92110.59          | <.0001  | 1                |
| <b>Lymp</b> | 407076.67               | 202503.69         | 0.0498  | 2                |
| <b>Macr</b> | 280142.78               | 116915.56         | 0.0204  | 3                |

| Least Squares Means for effect type<br>Pr >  t  for H0: LSMean(i)=LSMean(j) |        |        |        |
|-----------------------------------------------------------------------------|--------|--------|--------|
| Dependent Variable: Nuclearvolume                                           |        |        |        |
| i/j                                                                         | 1      | 2      | 3      |
| 1                                                                           |        | 0.0003 | <.0001 |
| 2                                                                           | 0.0003 |        | 0.5896 |
| 3                                                                           | <.0001 | 0.5896 |        |

*The GLM Procedure*  
*Least Squares Means*

pt=16AA7280

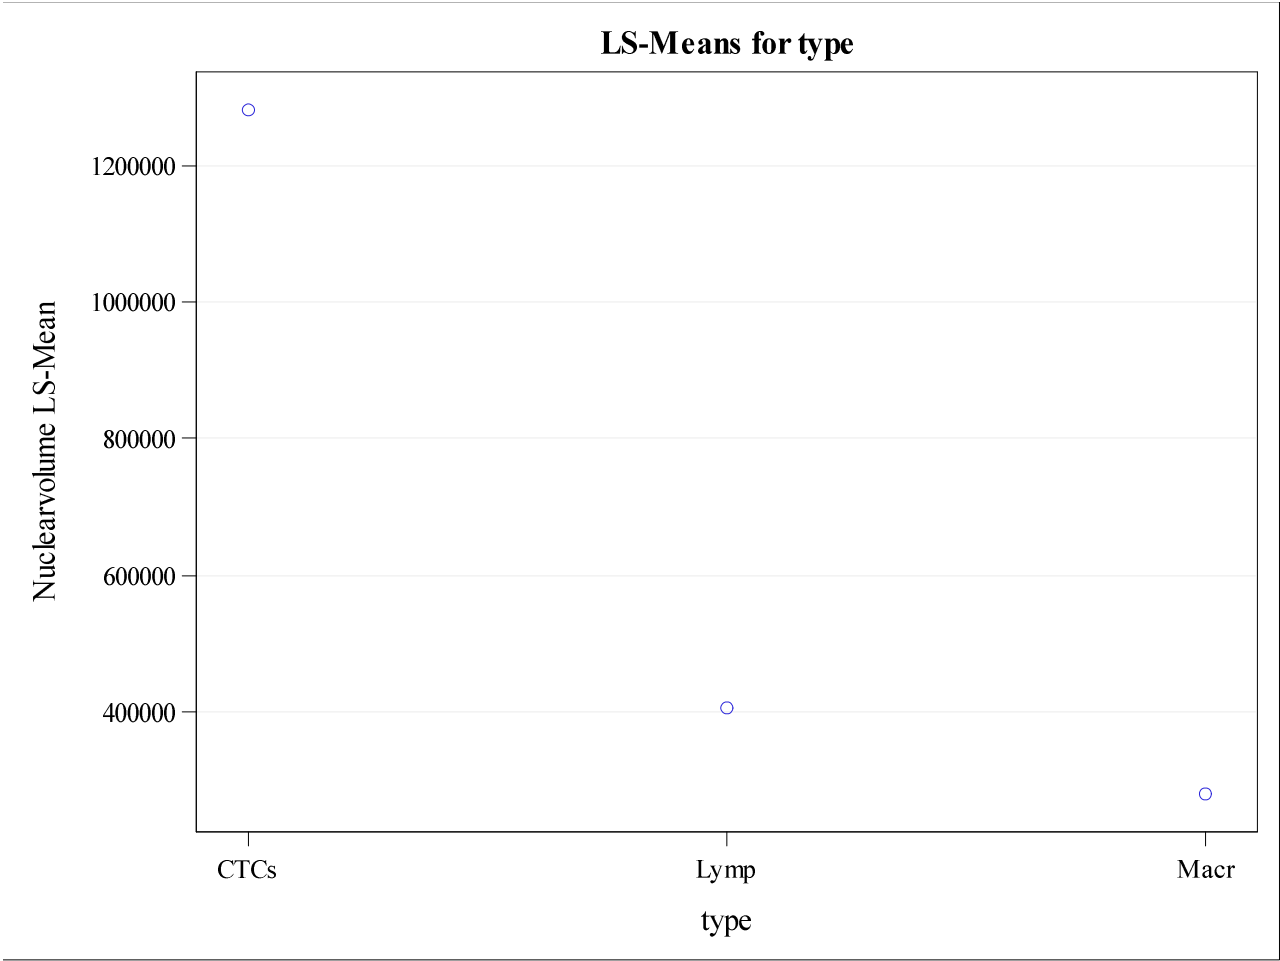

***The GLM Procedure***  
***Least Squares Means***

pt=16AA7280

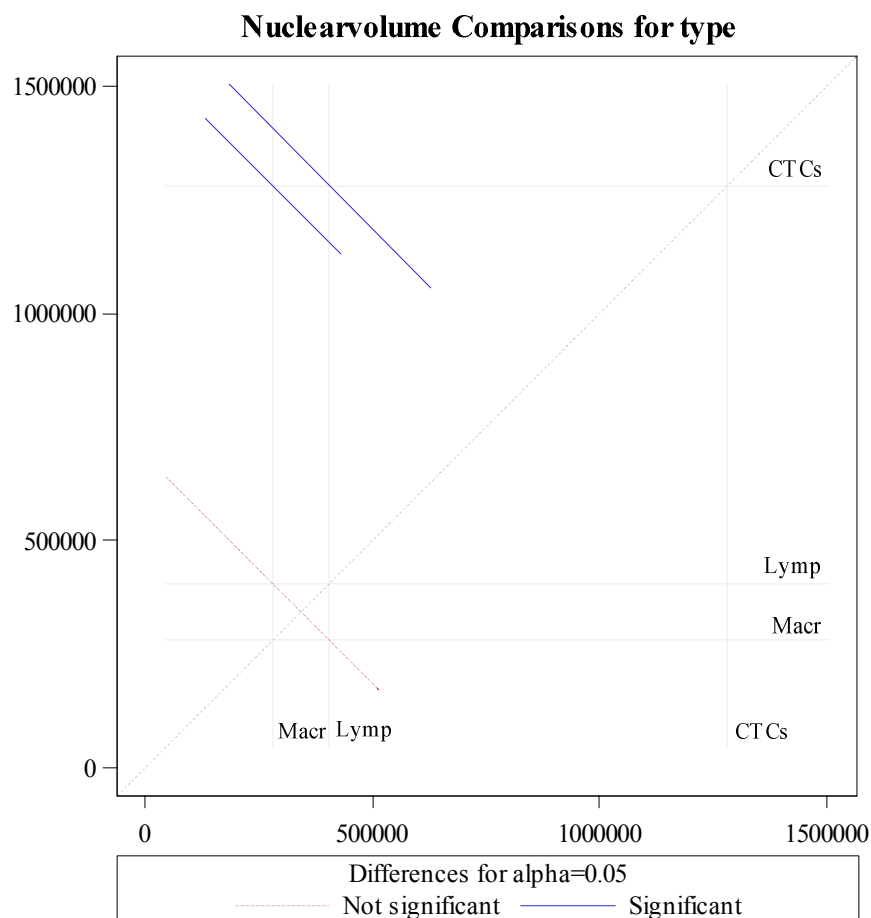

| type        | telomereperkvol<br>LSMEAN | Standard<br>Error | Pr >  t | LSMEAN<br>Number |
|-------------|---------------------------|-------------------|---------|------------------|
| <b>CTCs</b> | 0.12365596                | 0.00573685        | <.0001  | 1                |
| <b>Lymp</b> | 0.04923774                | 0.01261238        | 0.0003  | 2                |
| <b>Macr</b> | 0.10843439                | 0.00728176        | <.0001  | 3                |

| Least Squares Means for effect type<br>Pr >  t  for H0: LSMean(i)=LSMean(j) |        |        |        |
|-----------------------------------------------------------------------------|--------|--------|--------|
| Dependent Variable: telomereperkvol                                         |        |        |        |
| i/j                                                                         | 1      | 2      | 3      |
| 1                                                                           |        | <.0001 | 0.1069 |
| 2                                                                           | <.0001 |        | 0.0002 |
| 3                                                                           | 0.1069 | 0.0002 |        |



*The GLM Procedure*  
*Least Squares Means*

pt=16AA7280

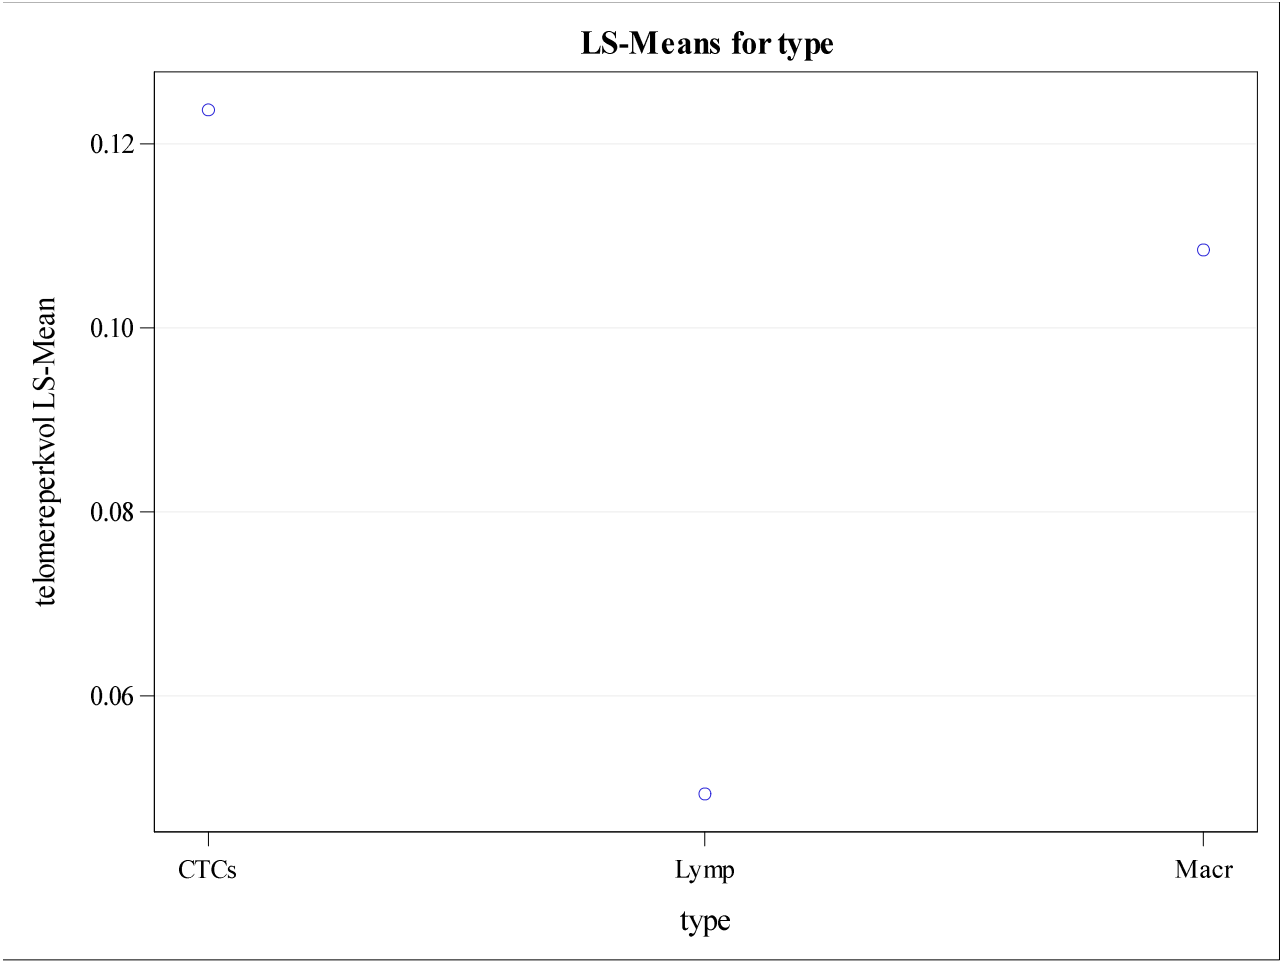

*The GLM Procedure*  
*Least Squares Means*

pt=16AA7280

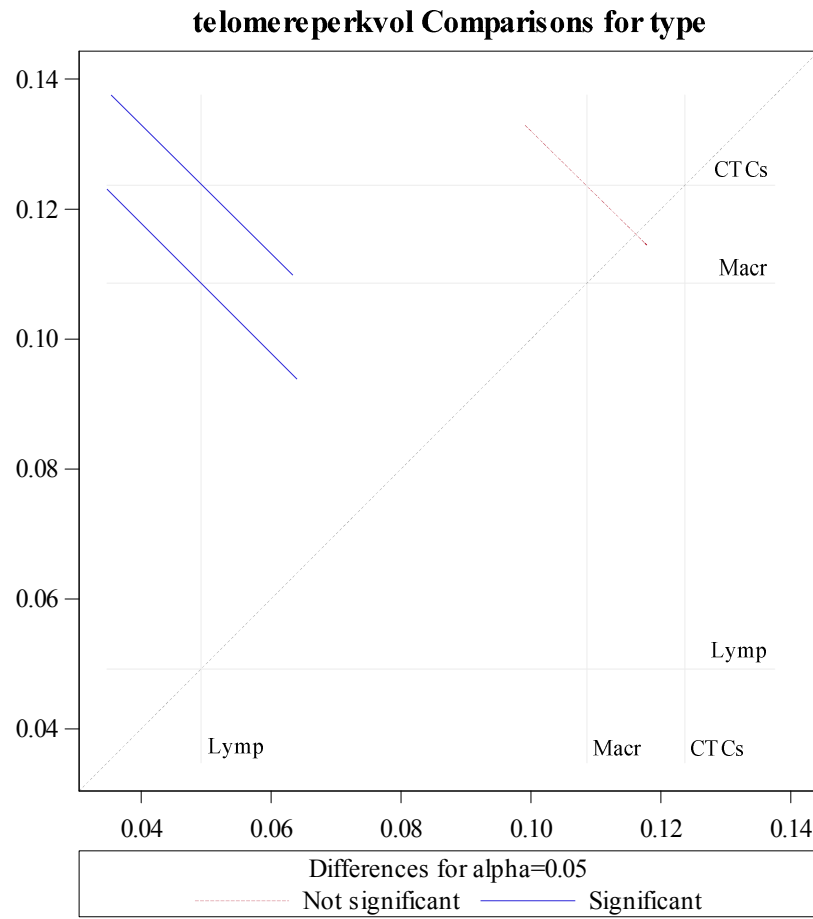

**Note:** To ensure overall protection level, only probabilities associated with pre-planned comparisons should be used.

***The GLM Procedure*****pt=16AA7320**

| Class Level Information |        |                 |
|-------------------------|--------|-----------------|
| Class                   | Levels | Values          |
| type                    | 3      | CTCs Lymph Macr |

|                             |    |
|-----------------------------|----|
| Number of Observations Read | 83 |
| Number of Observations Used | 83 |

**The GLM Procedure**

**Dependent Variable: Totalnofsignals**  
**Totalnofsignals**

**pt=16AA7320**

| Source                 | DF | Sum of Squares | Mean Square | F Value | Pr > F |
|------------------------|----|----------------|-------------|---------|--------|
| <b>Model</b>           | 2  | 69736.8597     | 34868.4299  | 21.30   | <.0001 |
| <b>Error</b>           | 80 | 130963.3089    | 1637.0414   |         |        |
| <b>Corrected Total</b> | 82 | 200700.1687    |             |         |        |

| R-Square | Coeff Var | Root MSE | Totalnofsignals Mean |
|----------|-----------|----------|----------------------|
| 0.347468 | 78.20705  | 40.46037 | 51.73494             |

| Source      | DF | Type III SS | Mean Square | F Value | Pr > F |
|-------------|----|-------------|-------------|---------|--------|
| <b>type</b> | 2  | 69736.85973 | 34868.42987 | 21.30   | <.0001 |

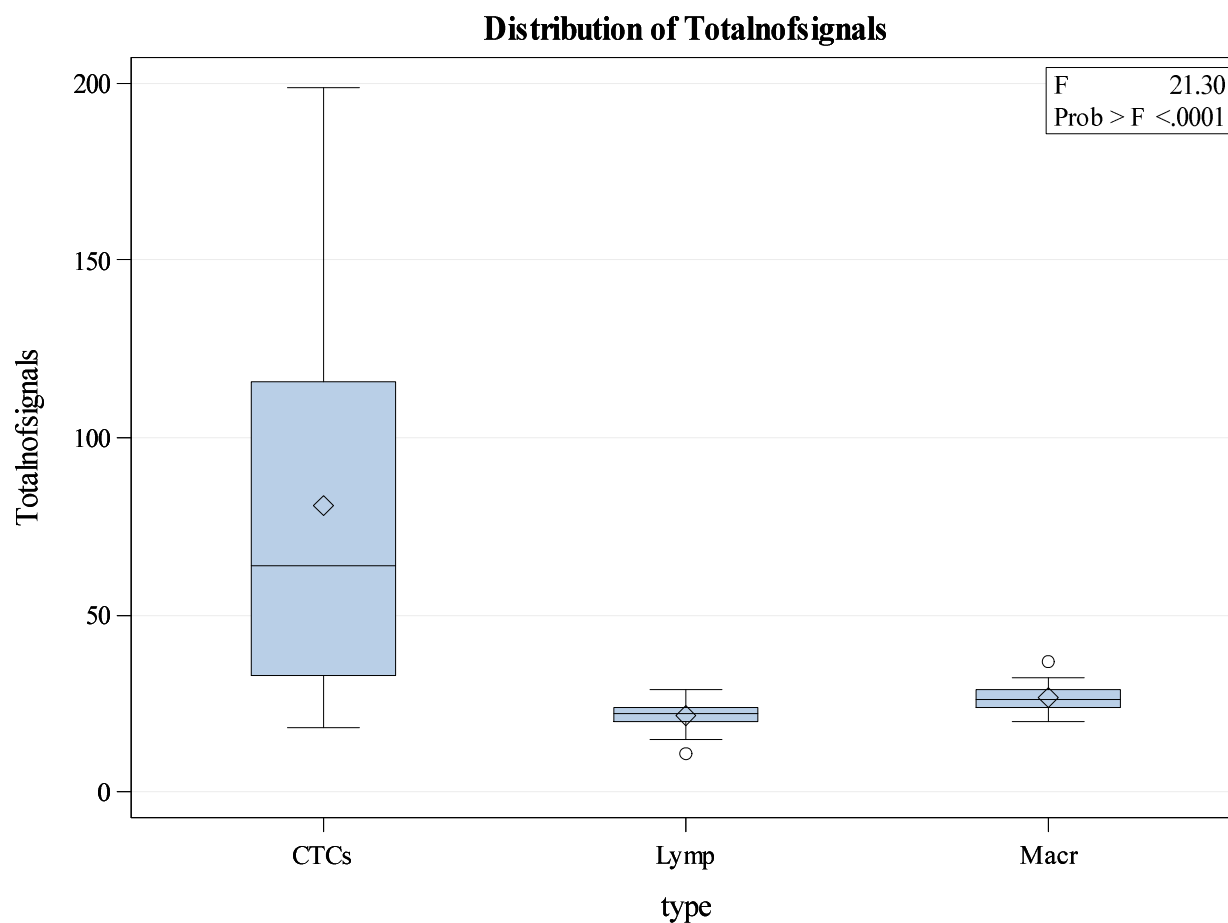

**The GLM Procedure****Dependent Variable: Totalnofaggregates Totalnofaggregates****pt=16AA7320**

| Source          | DF | Sum of Squares | Mean Square | F Value | Pr > F |
|-----------------|----|----------------|-------------|---------|--------|
| Model           | 2  | 1070.268606    | 535.134303  | 14.27   | <.0001 |
| Error           | 80 | 2999.972358    | 37.499654   |         |        |
| Corrected Total | 82 | 4070.240964    |             |         |        |

| R-Square | Coeff Var | Root MSE | Totalnofaggregates Mean |
|----------|-----------|----------|-------------------------|
| 0.262950 | 109.7768  | 6.123696 | 5.578313                |

| Source | DF | Type III SS | Mean Square | F Value | Pr > F |
|--------|----|-------------|-------------|---------|--------|
| type   | 2  | 1070.268606 | 535.134303  | 14.27   | <.0001 |

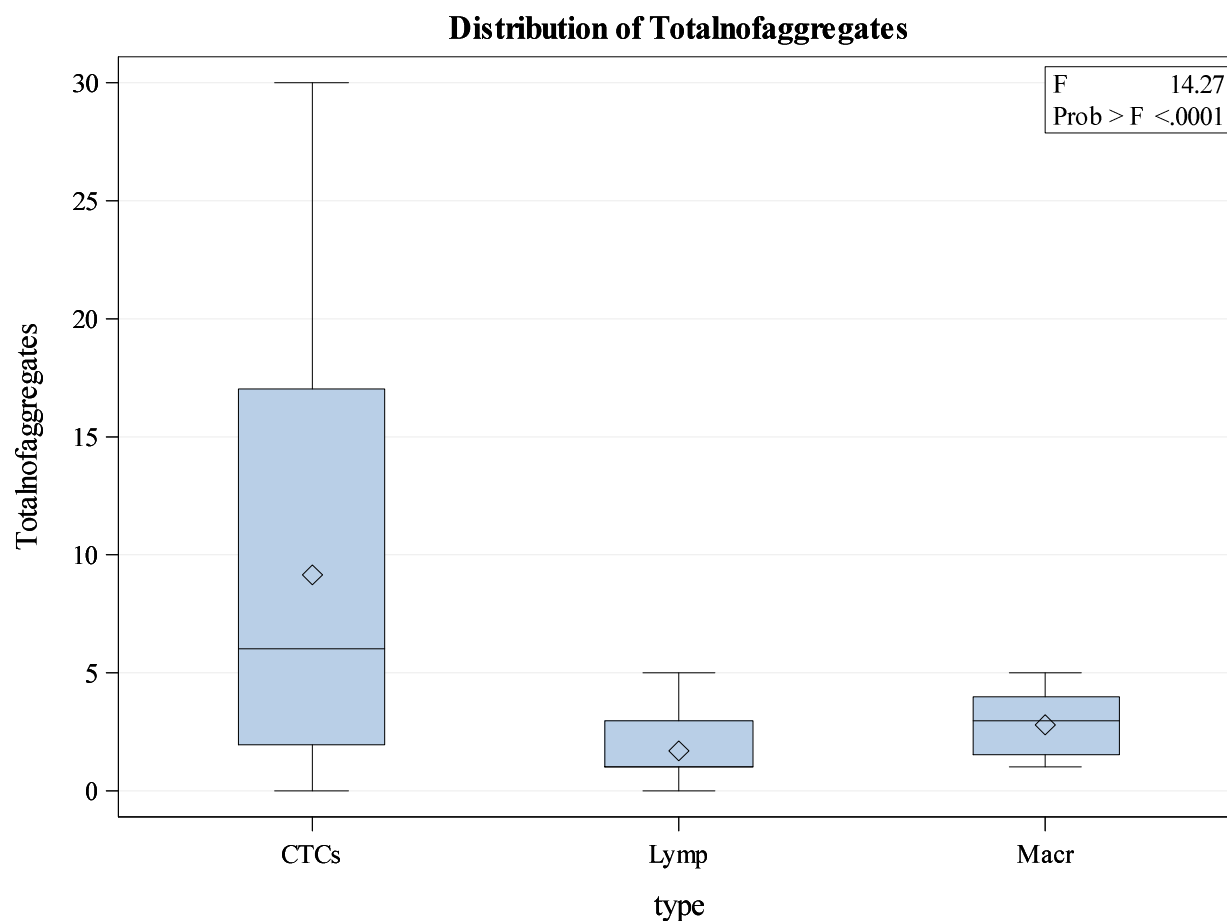

**The GLM Procedure**

**Dependent Variable: acratio**  
**acratio**

**pt=16AA7320**

| Source                 | DF | Sum of Squares | Mean Square | F Value | Pr > F |
|------------------------|----|----------------|-------------|---------|--------|
| <b>Model</b>           | 2  | 241.8629818    | 120.9314909 | 20.58   | <.0001 |
| <b>Error</b>           | 80 | 470.1980437    | 5.8774755   |         |        |
| <b>Corrected Total</b> | 82 | 712.0610255    |             |         |        |

| R-Square | Coeff Var | Root MSE | acratio Mean |
|----------|-----------|----------|--------------|
| 0.339666 | 68.30916  | 2.424351 | 3.549085     |

| Source      | DF | Type III SS | Mean Square | F Value | Pr > F |
|-------------|----|-------------|-------------|---------|--------|
| <b>type</b> | 2  | 241.8629818 | 120.9314909 | 20.58   | <.0001 |

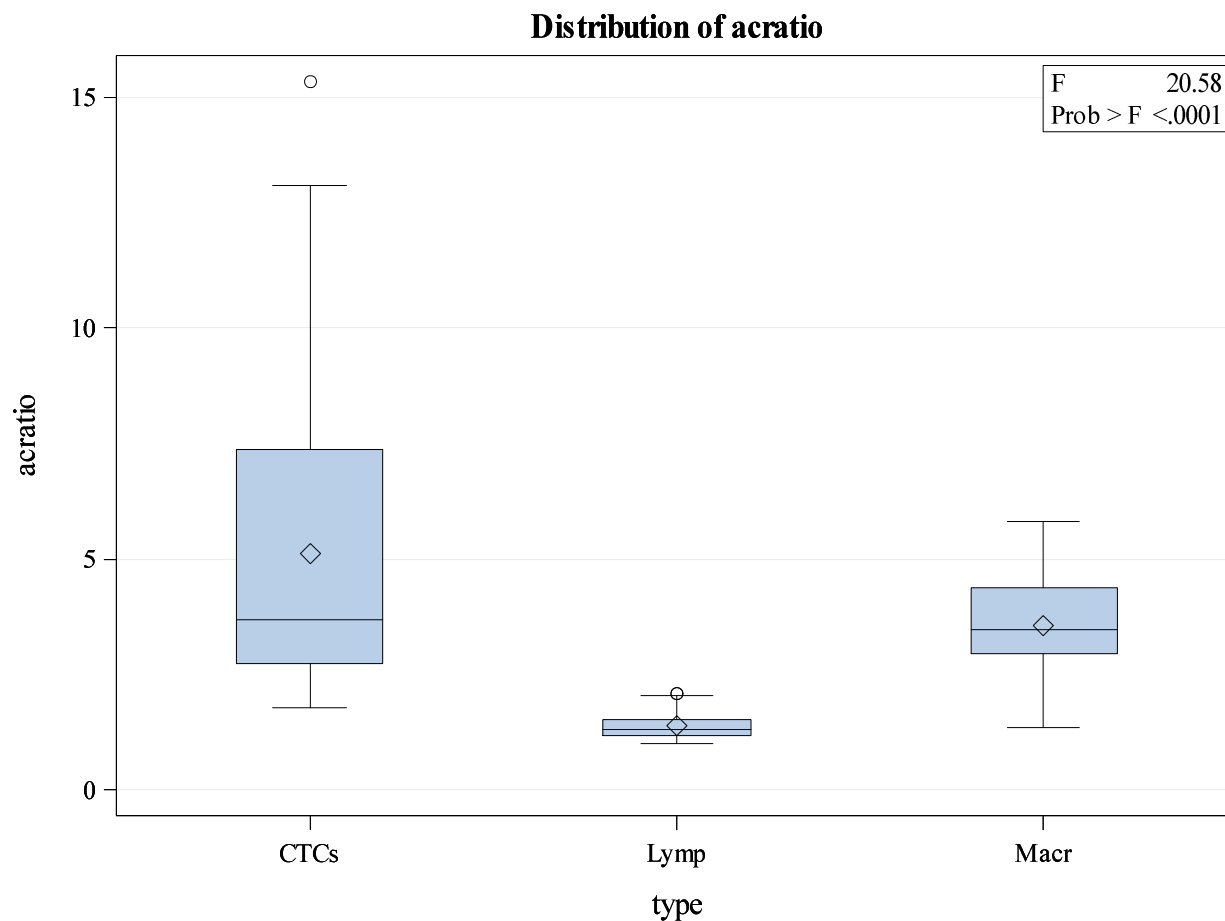

**The GLM Procedure**

**Dependent Variable: AvIntallsignals**  
**AvIntallsignals**

**pt=16AA7320**

| Source                 | DF | Sum of Squares | Mean Square | F Value | Pr > F |
|------------------------|----|----------------|-------------|---------|--------|
| <b>Model</b>           | 2  | 5201981327     | 2600990664  | 103.56  | <.0001 |
| <b>Error</b>           | 80 | 2009342891     | 25116786    |         |        |
| <b>Corrected Total</b> | 82 | 7211324218     |             |         |        |

| R-Square | Coeff Var | Root MSE | AvIntallsignals Mean |
|----------|-----------|----------|----------------------|
| 0.721363 | 27.42473  | 5011.665 | 18274.25             |

| Source      | DF | Type III SS | Mean Square | F Value | Pr > F |
|-------------|----|-------------|-------------|---------|--------|
| <b>type</b> | 2  | 5201981327  | 2600990664  | 103.56  | <.0001 |

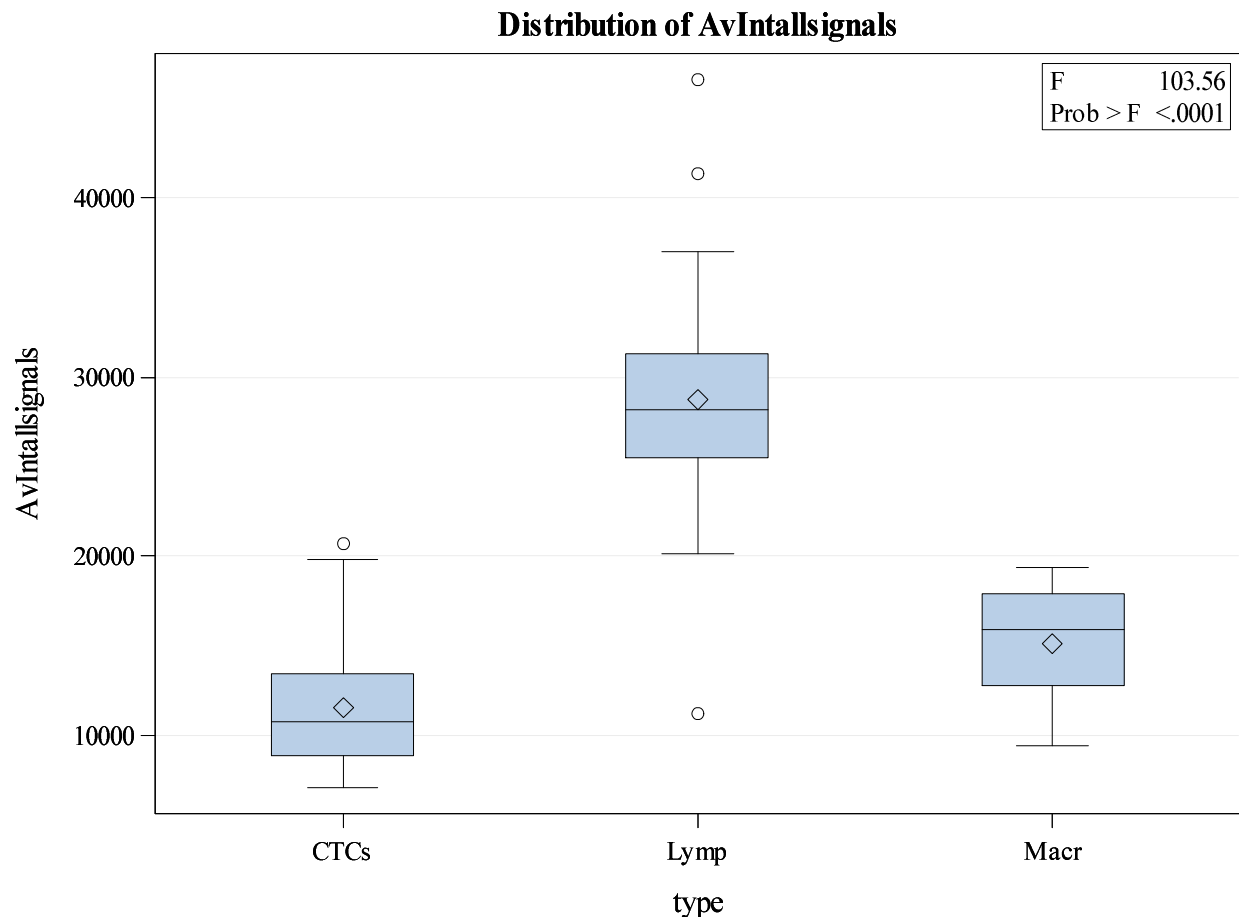

**The GLM Procedure**

**Dependent Variable: Totalintensity**  
**Totalintensity**

**pt=16AA7320**

| Source                 | DF | Sum of Squares | Mean Square  | F Value | Pr > F |
|------------------------|----|----------------|--------------|---------|--------|
| <b>Model</b>           | 2  | 2.2402935E12   | 1.1201468E12 | 6.74    | 0.0020 |
| <b>Error</b>           | 80 | 1.3289486E13   | 166118577497 |         |        |
| <b>Corrected Total</b> | 82 | 1.552978E13    |              |         |        |

| R-Square | Coeff Var | Root MSE | Totalintensity Mean |
|----------|-----------|----------|---------------------|
| 0.144258 | 58.17479  | 407576.5 | 700606.7            |

| Source      | DF | Type III SS  | Mean Square  | F Value | Pr > F |
|-------------|----|--------------|--------------|---------|--------|
| <b>type</b> | 2  | 2.2402935E12 | 1.1201468E12 | 6.74    | 0.0020 |

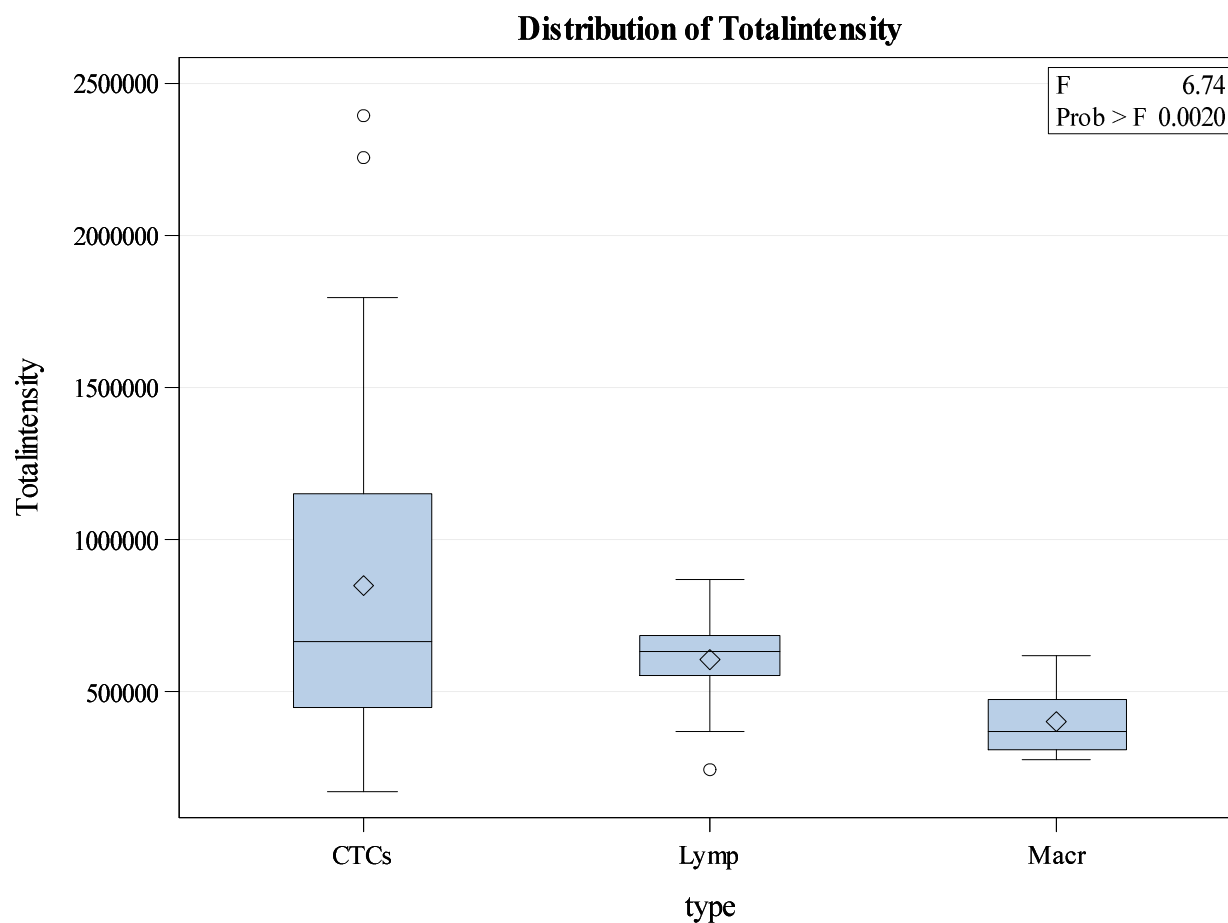



**The GLM Procedure**

**Dependent Variable: Nuclearvolume**  
**Nuclearvolume**

**pt=16AA7320**

| Source                 | DF | Sum of Squares | Mean Square  | F Value | Pr > F |
|------------------------|----|----------------|--------------|---------|--------|
| <b>Model</b>           | 2  | 7.6233147E12   | 3.8116574E12 | 68.50   | <.0001 |
| <b>Error</b>           | 80 | 4.4518117E12   | 55647645804  |         |        |
| <b>Corrected Total</b> | 82 | 1.2075126E13   |              |         |        |

| R-Square | Coeff Var | Root MSE | Nuclearvolume Mean |
|----------|-----------|----------|--------------------|
| 0.631324 | 47.23352  | 235897.5 | 499428.2           |

| Source      | DF | Type III SS  | Mean Square  | F Value | Pr > F |
|-------------|----|--------------|--------------|---------|--------|
| <b>type</b> | 2  | 7.6233147E12 | 3.8116574E12 | 68.50   | <.0001 |

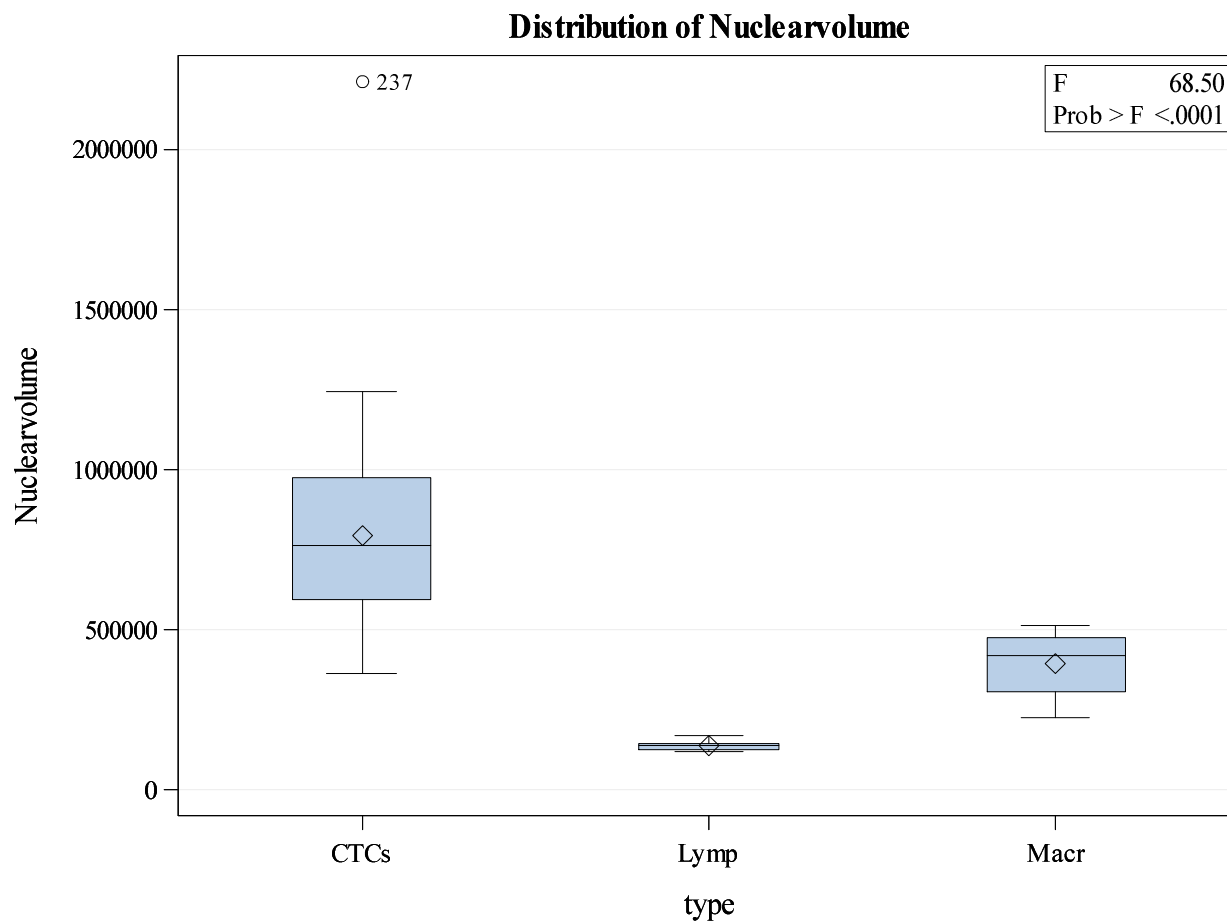

**The GLM Procedure****Dependent Variable: telomereperkv****pt=16AA7320**

| Source                 | DF | Sum of Squares | Mean Square | F Value | Pr > F |
|------------------------|----|----------------|-------------|---------|--------|
| <b>Model</b>           | 2  | 0.08079289     | 0.04039645  | 21.68   | <.0001 |
| <b>Error</b>           | 80 | 0.14903417     | 0.00186293  |         |        |
| <b>Corrected Total</b> | 82 | 0.22982706     |             |         |        |

| R-Square | Coeff Var | Root MSE | telomereperkv Mean |
|----------|-----------|----------|--------------------|
| 0.351538 | 36.85276  | 0.043162 | 0.117119           |

| Source      | DF | Type III SS | Mean Square | F Value | Pr > F |
|-------------|----|-------------|-------------|---------|--------|
| <b>type</b> | 2  | 0.08079289  | 0.04039645  | 21.68   | <.0001 |

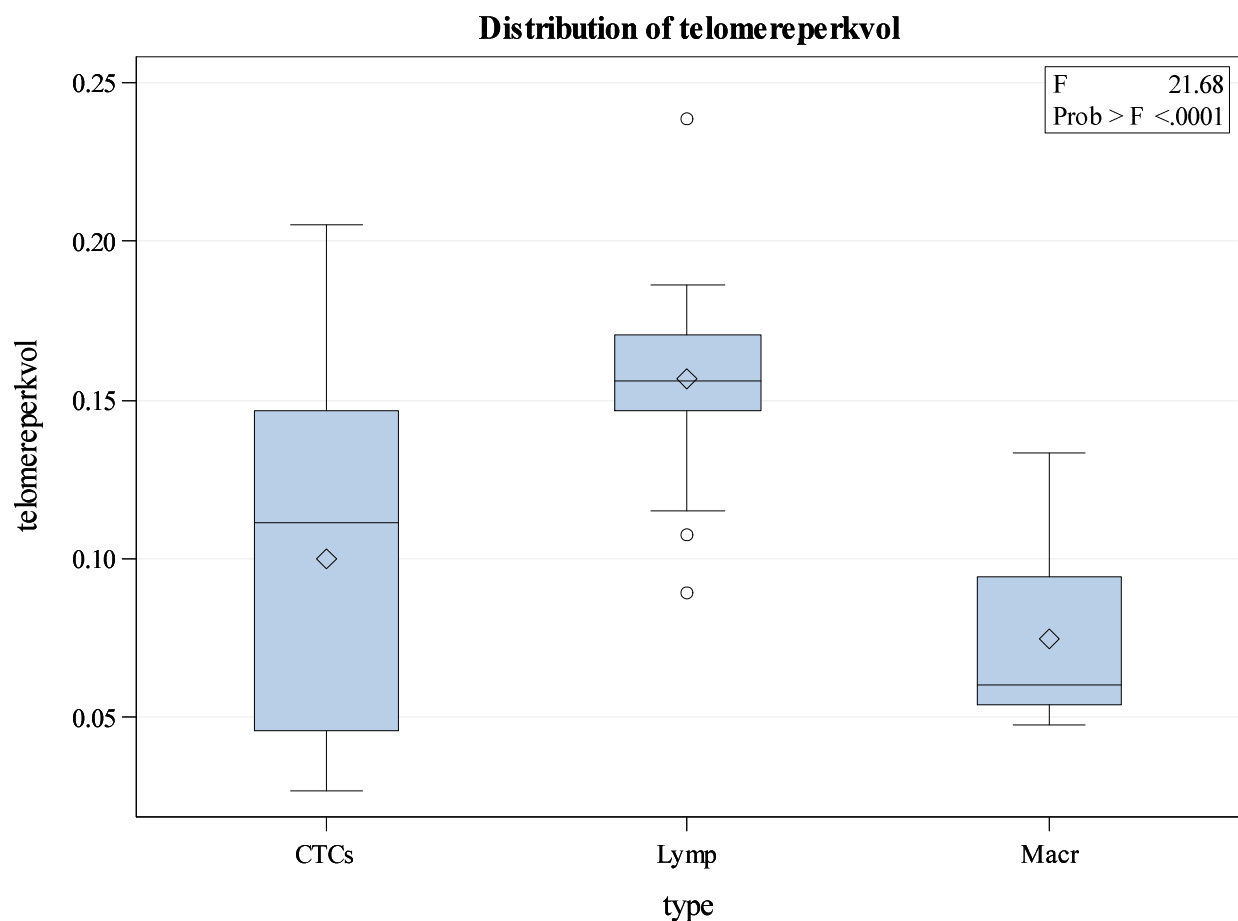

**The GLM Procedure**  
**Least Squares Means**

**pt=16AA7320**

| type        | Totalnofsignals<br>LSMEAN | Standard<br>Error | Pr >  t | LSMEAN<br>Number |
|-------------|---------------------------|-------------------|---------|------------------|
| <b>CTCs</b> | 81.0243902                | 6.3188478         | <.0001  | 1                |
| <b>Lymp</b> | 21.6666667                | 7.3870187         | 0.0044  | 2                |
| <b>Macr</b> | 26.8333333                | 11.6799021        | 0.0242  | 3                |

| Least Squares Means for effect type<br>Pr >  t  for H0: LSMean(i)=LSMean(j) |        |        |        |
|-----------------------------------------------------------------------------|--------|--------|--------|
| Dependent Variable: Totalnofsignals                                         |        |        |        |
| i/j                                                                         | 1      | 2      | 3      |
| 1                                                                           |        | <.0001 | 0.0001 |
| 2                                                                           | <.0001 |        | 0.7095 |
| 3                                                                           | 0.0001 | 0.7095 |        |

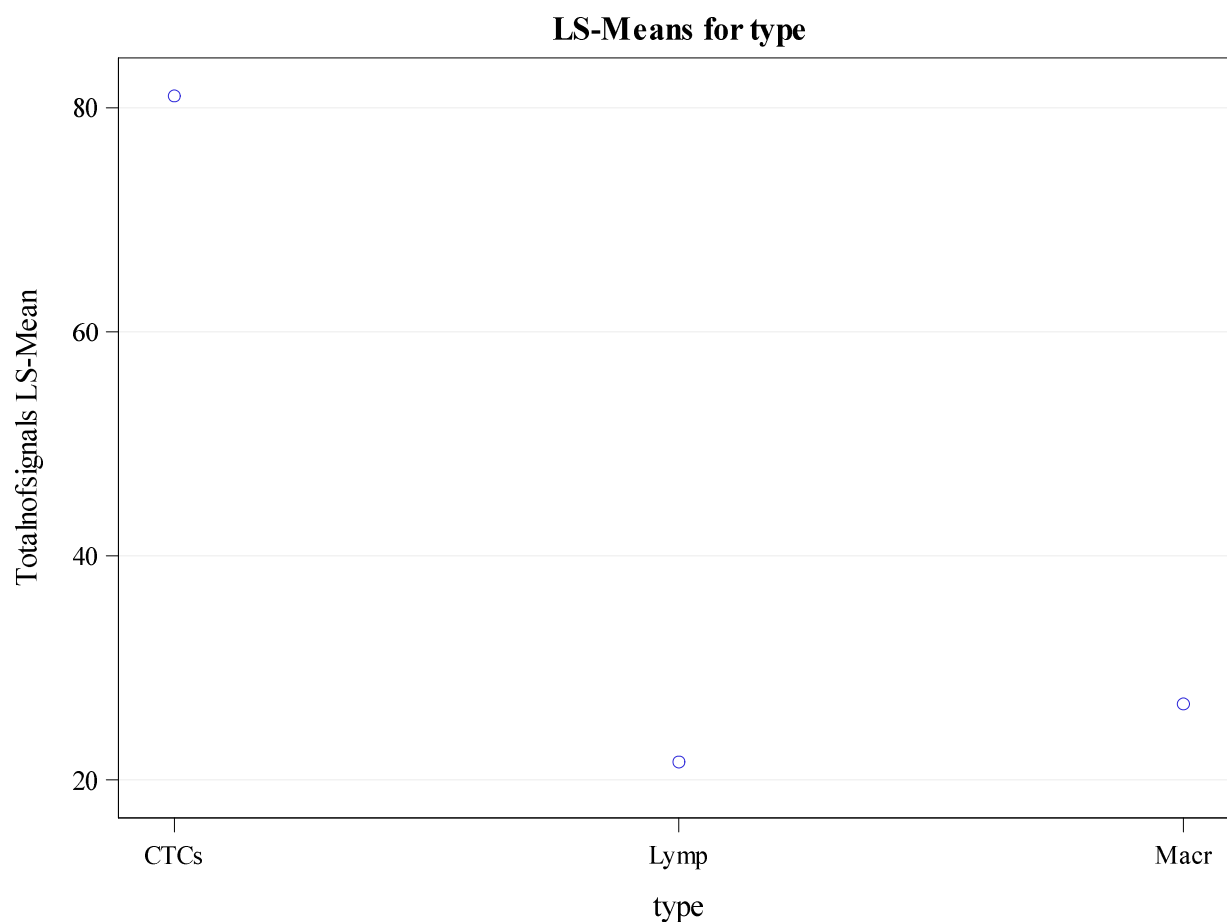

***The GLM Procedure***  
***Least Squares Means***

**pt=16AA7320**

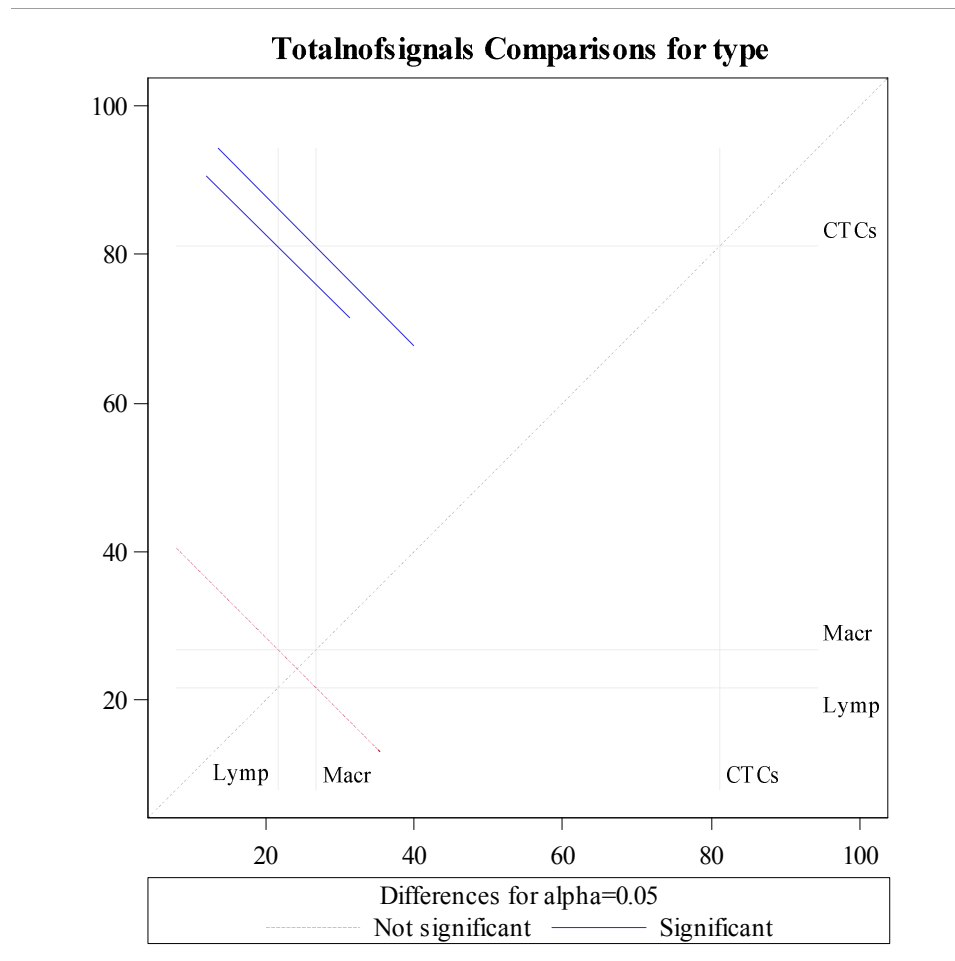

| type        | Totalnofaggregates<br>LSMEAN | Standard<br>Error | Pr >  t | LSMEAN<br>Number |
|-------------|------------------------------|-------------------|---------|------------------|
| <b>CTCs</b> | 9.19512195                   | 0.95636066        | <.0001  | 1                |
| <b>Lymp</b> | 1.73333333                   | 1.11802884        | 0.1250  | 2                |
| <b>Macr</b> | 2.83333333                   | 1.76775881        | 0.1129  | 3                |

*The GLM Procedure*  
*Least Squares Means*

pt=16AA7320

| Least Squares Means for effect type<br>Pr >  t  for H0: LSMean(i)=LSMean(j) |        |        |        |
|-----------------------------------------------------------------------------|--------|--------|--------|
| Dependent Variable: Totalnofaggregates                                      |        |        |        |
| i/j                                                                         | 1      | 2      | 3      |
| 1                                                                           |        | <.0001 | 0.0022 |
| 2                                                                           | <.0001 |        | 0.6004 |
| 3                                                                           | 0.0022 | 0.6004 |        |

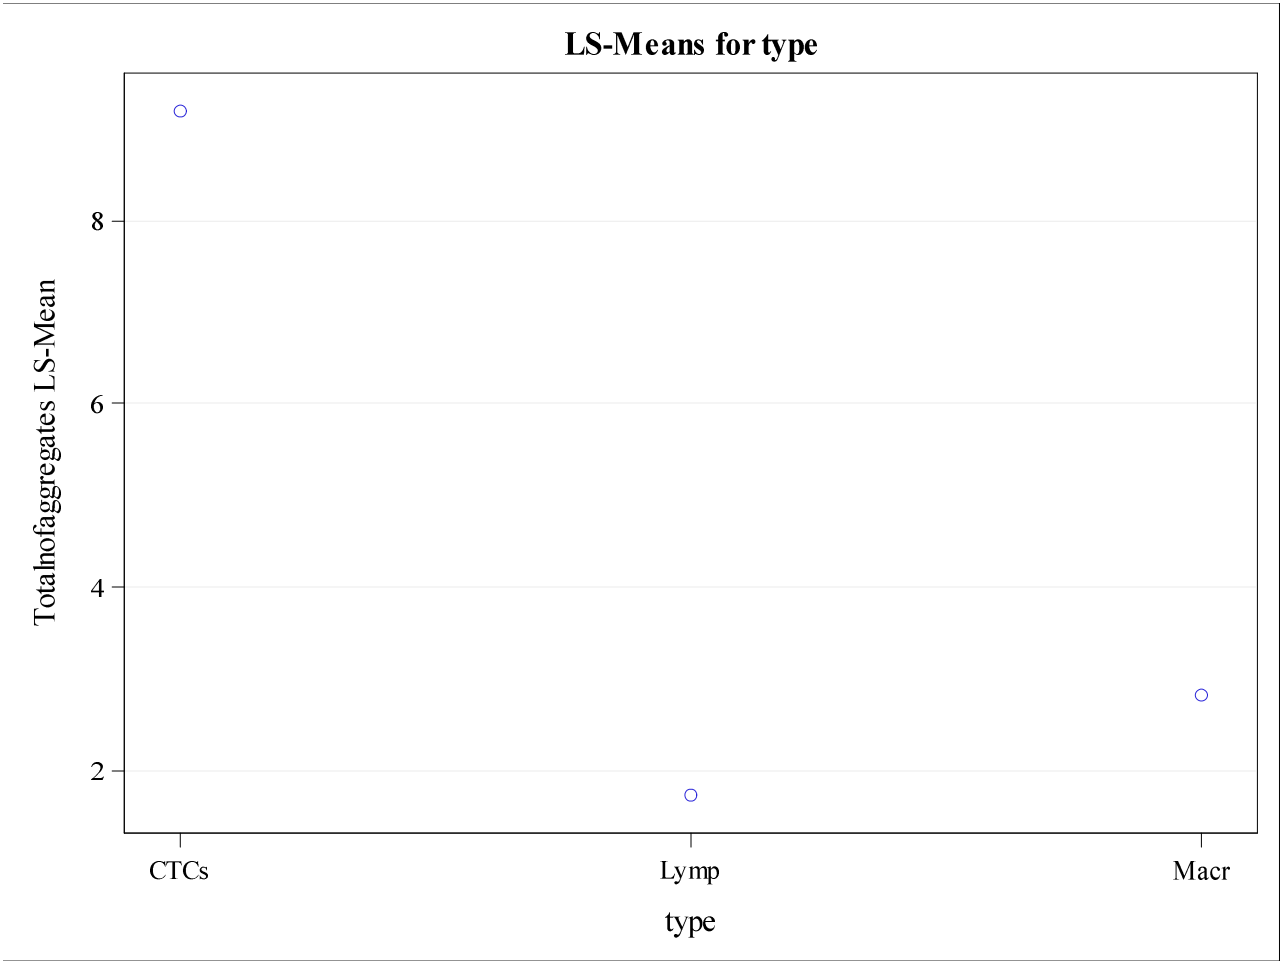

**The GLM Procedure**  
**Least Squares Means**

pt=16AA7320

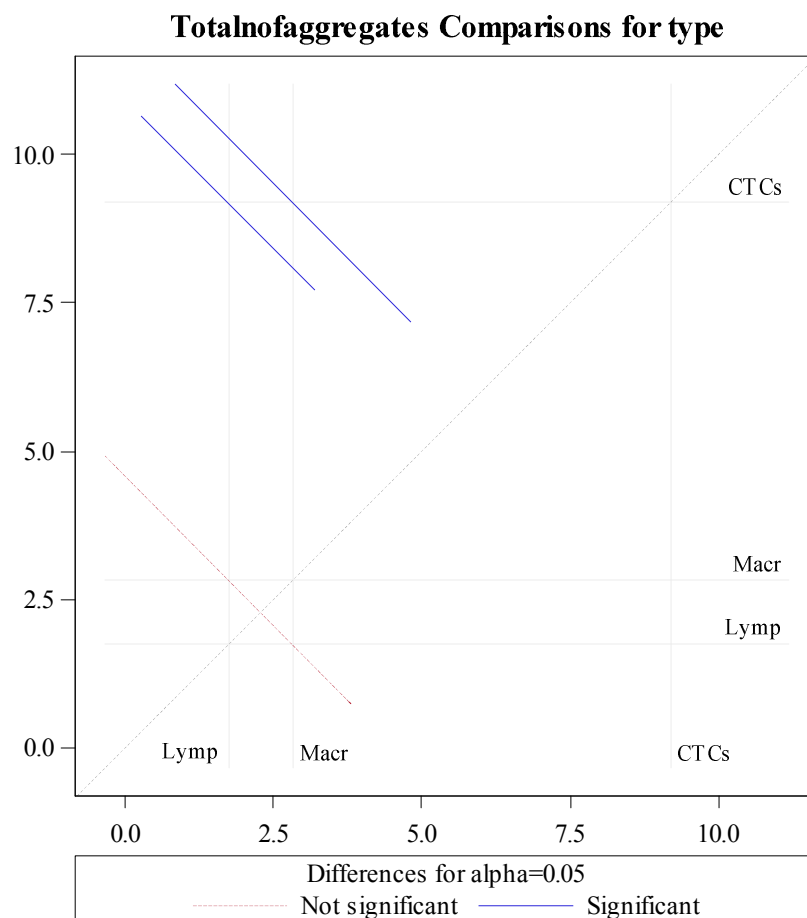

| type        | acratio<br>LSMEAN | Standard<br>Error | Pr >  t | LSMEAN<br>Number |
|-------------|-------------------|-------------------|---------|------------------|
| <b>CTCs</b> | 5.12348738        | 0.37861994        | <.0001  | 1                |
| <b>Lymp</b> | 1.38709094        | 0.44262383        | 0.0024  | 2                |
| <b>Macr</b> | 3.57486547        | 0.69984972        | <.0001  | 3                |

| Least Squares Means for effect type<br>Pr >  t  for H0: LSMean(i)=LSMean(j) |        |        |        |
|-----------------------------------------------------------------------------|--------|--------|--------|
| Dependent Variable: acratio                                                 |        |        |        |
| i/j                                                                         | 1      | 2      | 3      |
| 1                                                                           |        | <.0001 | 0.0551 |
| 2                                                                           | <.0001 |        | 0.0099 |
| 3                                                                           | 0.0551 | 0.0099 |        |

*The GLM Procedure*  
*Least Squares Means*

pt=16AA7320

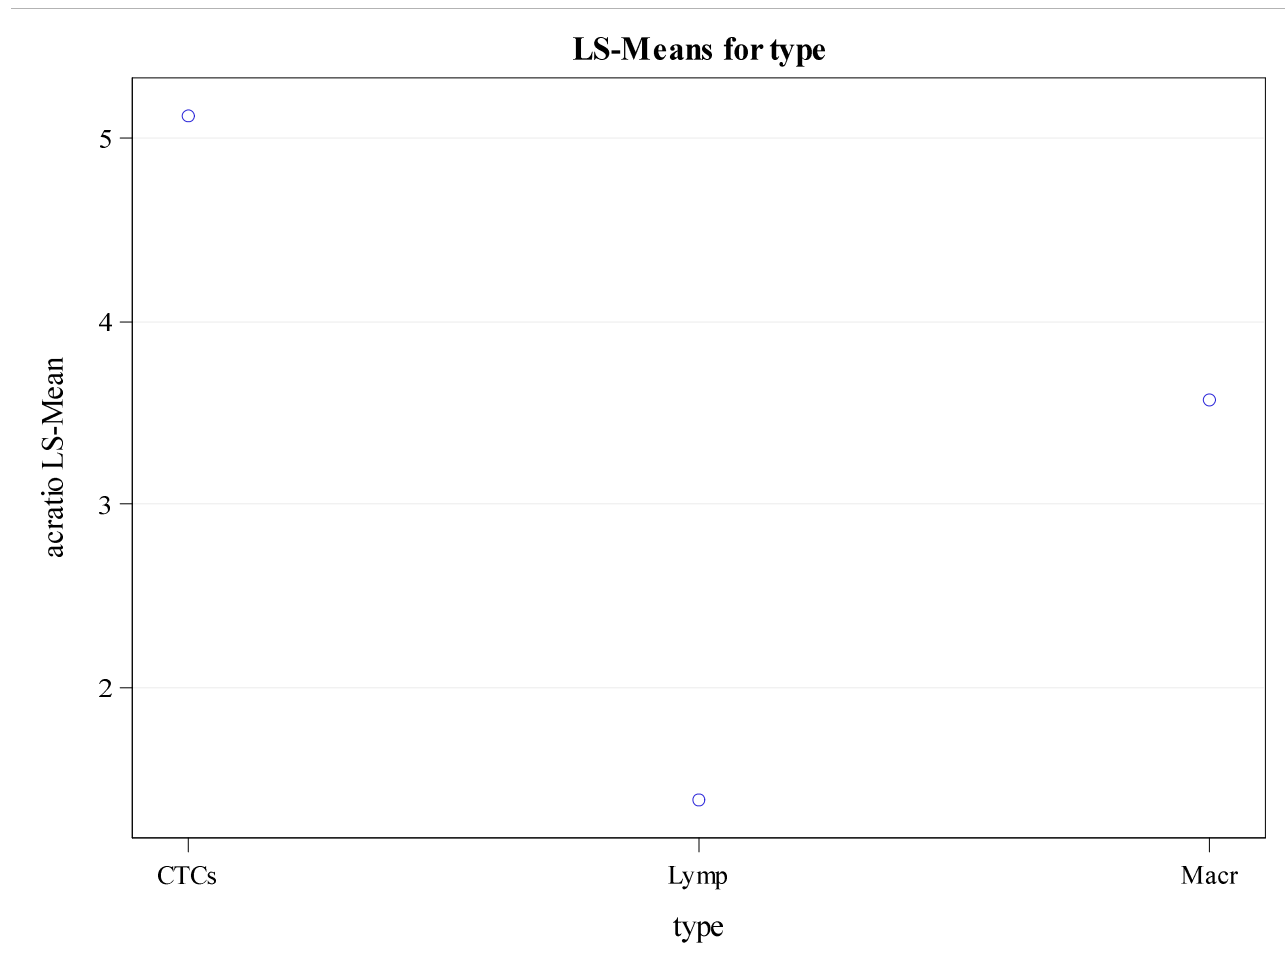

***The GLM Procedure***  
***Least Squares Means***

**pt=16AA7320**

**acratio Comparisons for type**

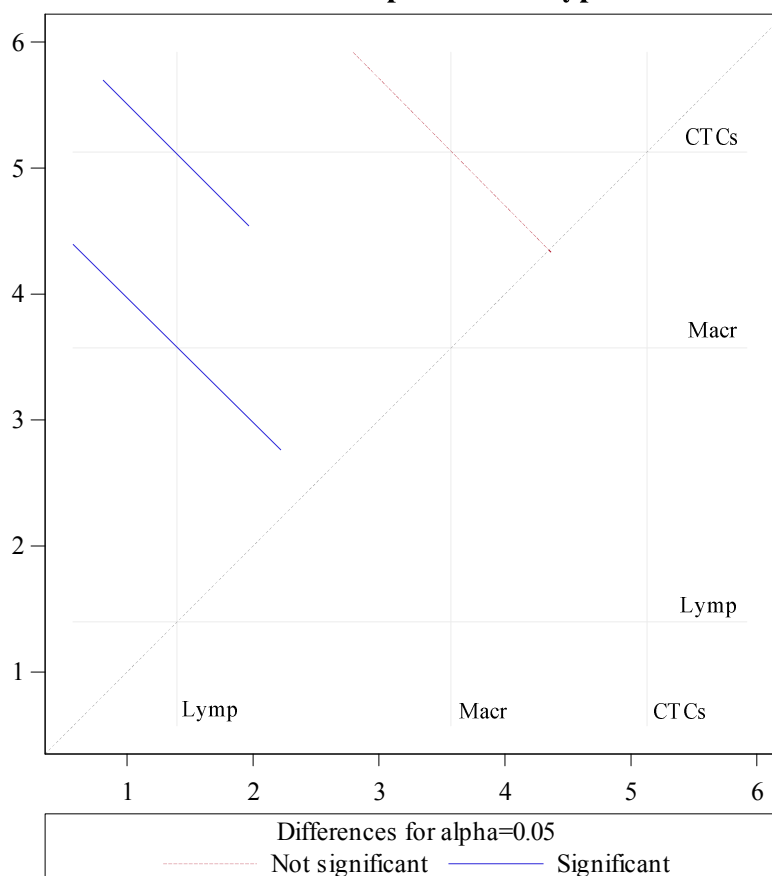

| type        | AvIntallsignals<br>LSMEAN | Standard<br>Error | Pr >  t | LSMEAN<br>Number |
|-------------|---------------------------|-------------------|---------|------------------|
| <b>CTCs</b> | 11585.0971                | 782.6906          | <.0001  | 1                |
| <b>Lymp</b> | 28679.0768                | 915.0007          | <.0001  | 2                |
| <b>Macr</b> | 15116.8080                | 1446.7431         | <.0001  | 3                |

| Least Squares Means for effect type<br>Pr >  t  for H0: LSMean(i)=LSMean(j) |        |        |        |
|-----------------------------------------------------------------------------|--------|--------|--------|
| Dependent Variable: AvIntallsignals                                         |        |        |        |
| i/j                                                                         | 1      | 2      | 3      |
| 1                                                                           |        | <.0001 | 0.0348 |
| 2                                                                           | <.0001 |        | <.0001 |
| 3                                                                           | 0.0348 | <.0001 |        |



*The GLM Procedure*  
*Least Squares Means*

pt=16AA7320

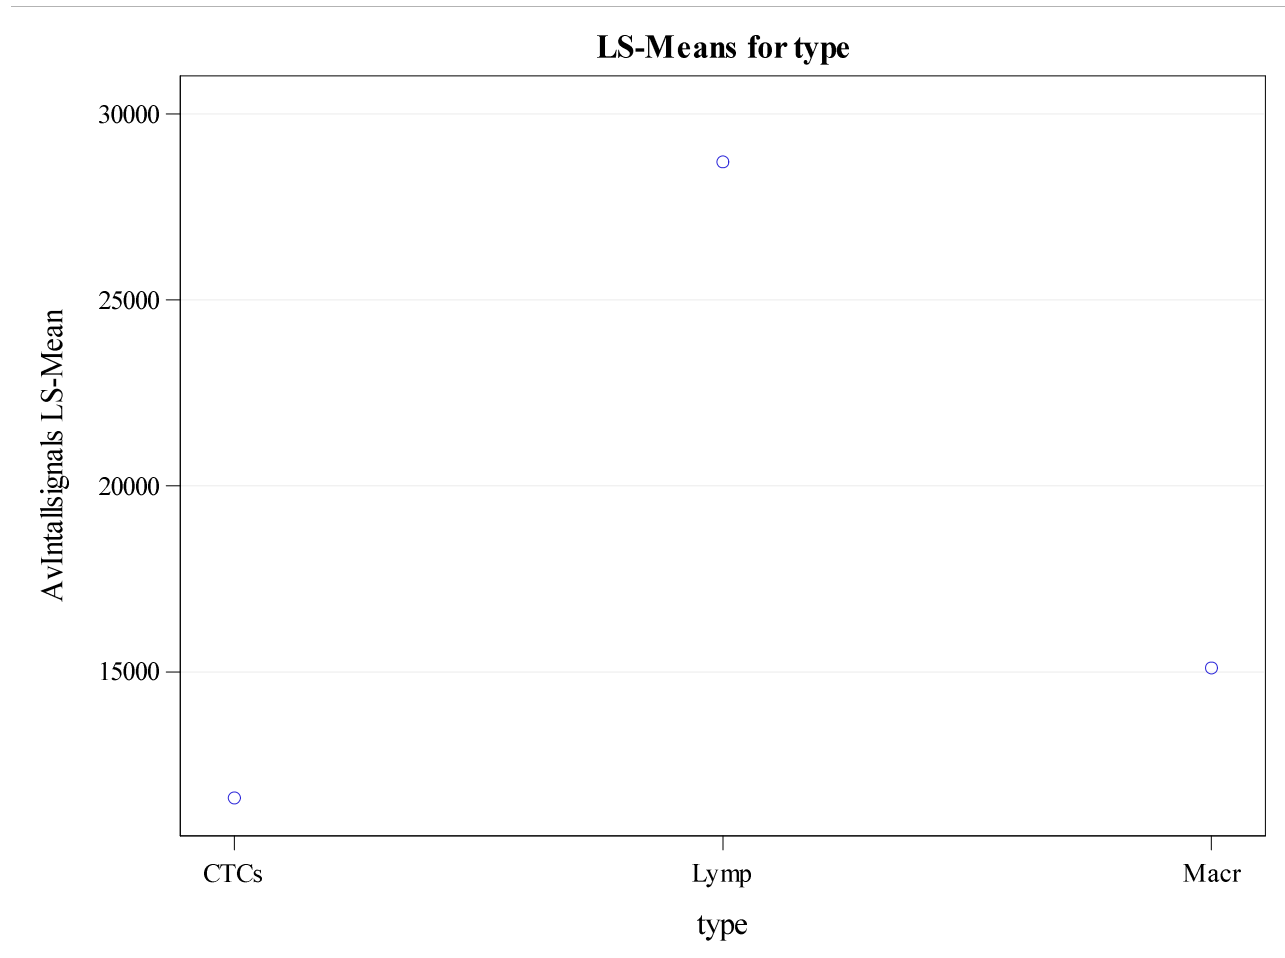

**The GLM Procedure**  
**Least Squares Means**

pt=16AA7320

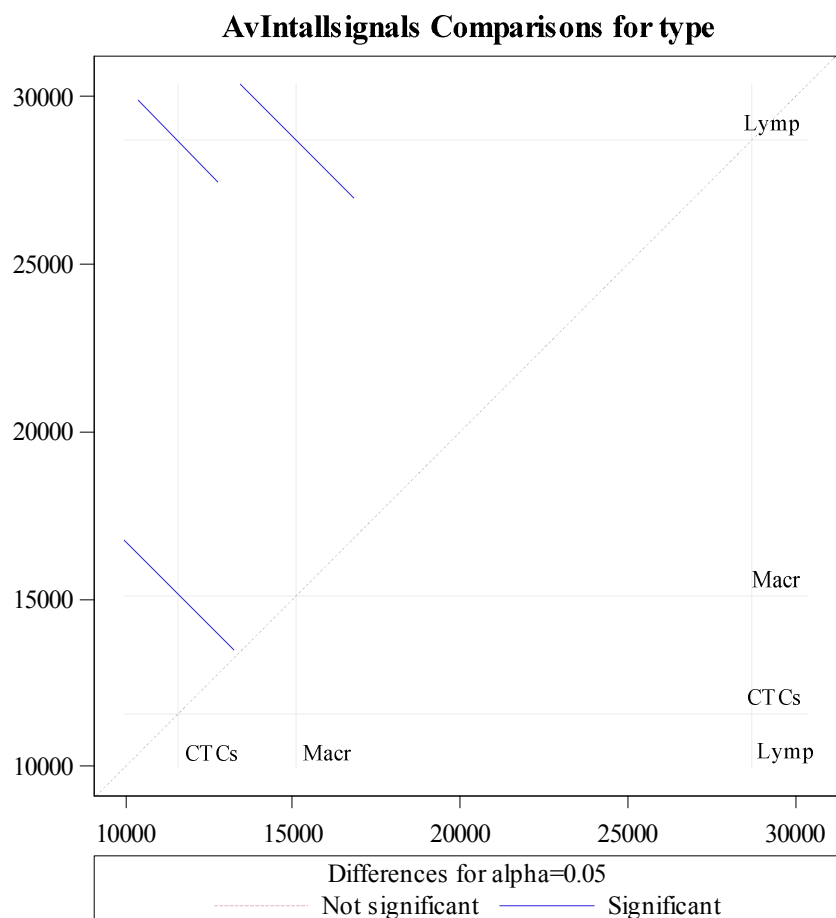

| type        | Totalintensity<br>LSMEAN | Standard<br>Error | Pr >  t | LSMEAN<br>Number |
|-------------|--------------------------|-------------------|---------|------------------|
| <b>CTCs</b> | 853134.317               | 63652.750         | <.0001  | 1                |
| <b>Lymp</b> | 609881.100               | 74412.942         | <.0001  | 2                |
| <b>Macr</b> | 406284.333               | 117657.192        | 0.0009  | 3                |

| Least Squares Means for effect type<br>Pr >  t  for H0: LSMean(i)=LSMean(j) |        |        |        |
|-----------------------------------------------------------------------------|--------|--------|--------|
| Dependent Variable: Totalintensity                                          |        |        |        |
| i/j                                                                         | 1      | 2      | 3      |
| 1                                                                           |        | 0.0151 | 0.0013 |
| 2                                                                           | 0.0151 |        | 0.1475 |
| 3                                                                           | 0.0013 | 0.1475 |        |

*The GLM Procedure*  
*Least Squares Means*

pt=16AA7320

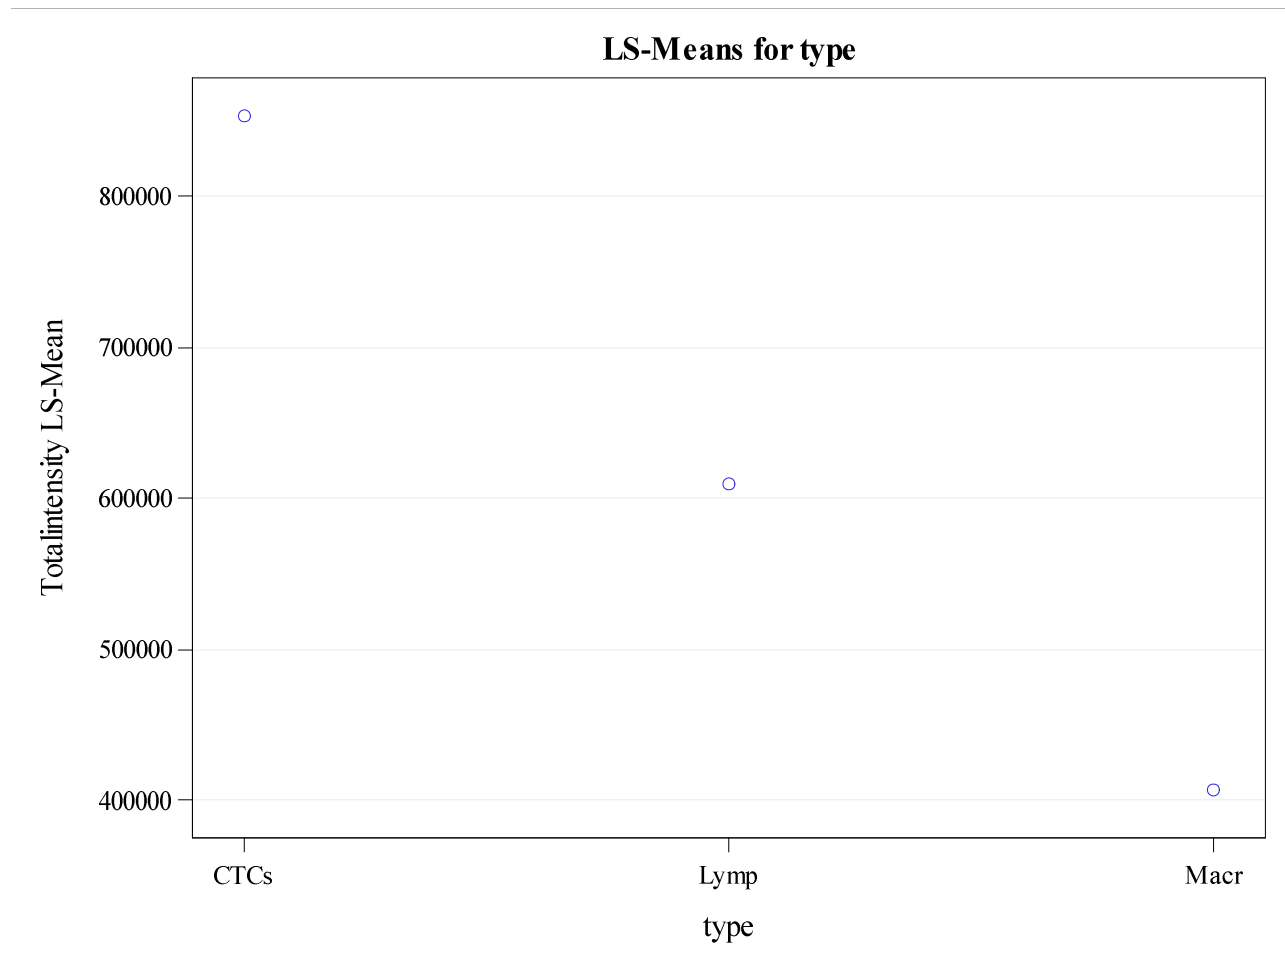

**The GLM Procedure**  
**Least Squares Means**

**pt=16AA7320**

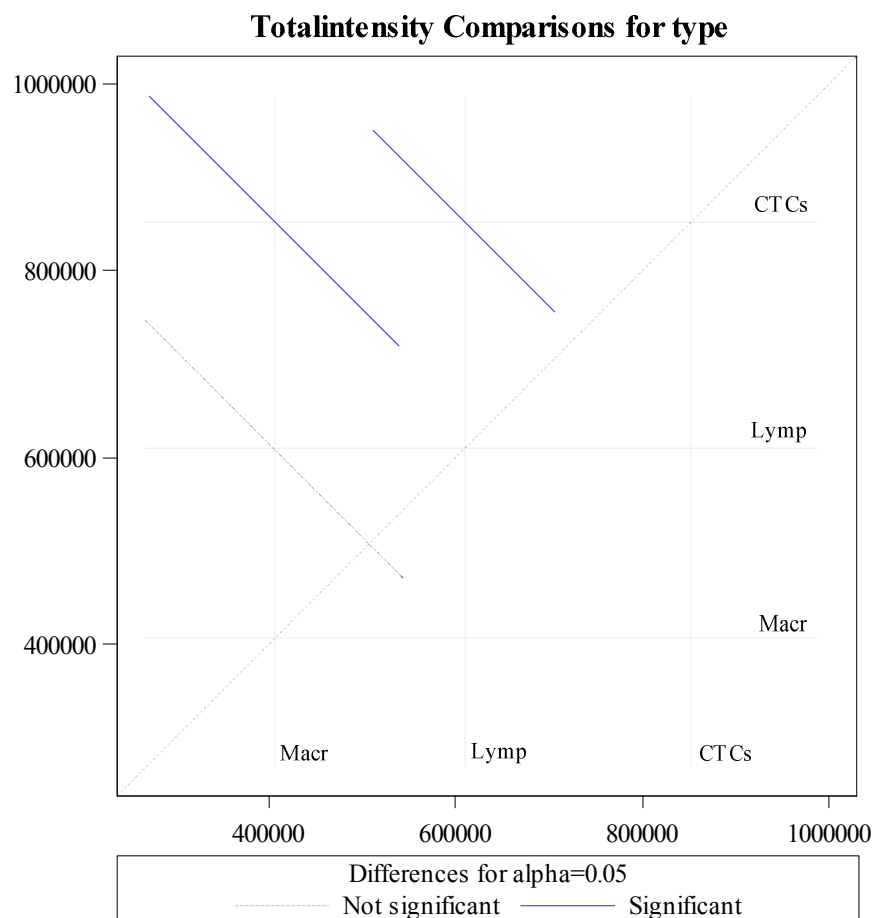

| type        | Nuclearvolume<br>LSMEAN | Standard<br>Error | Pr >  t | LSMEAN<br>Number |
|-------------|-------------------------|-------------------|---------|------------------|
| <b>CTCs</b> | 794816.829              | 36841.005         | <.0001  | 1                |
| <b>Lymp</b> | 138459.667              | 43068.800         | 0.0019  | 2                |
| <b>Macr</b> | 392605.083              | 68097.752         | <.0001  | 3                |

| Least Squares Means for effect type<br>Pr >  t  for H0: LSMean(i)=LSMean(j) |        |        |        |
|-----------------------------------------------------------------------------|--------|--------|--------|
| Dependent Variable: Nuclearvolume                                           |        |        |        |
| i/j                                                                         | 1      | 2      | 3      |
| 1                                                                           |        | <.0001 | <.0001 |
| 2                                                                           | <.0001 |        | 0.0023 |
| 3                                                                           | <.0001 | 0.0023 |        |

*The GLM Procedure*  
*Least Squares Means*

pt=16AA7320

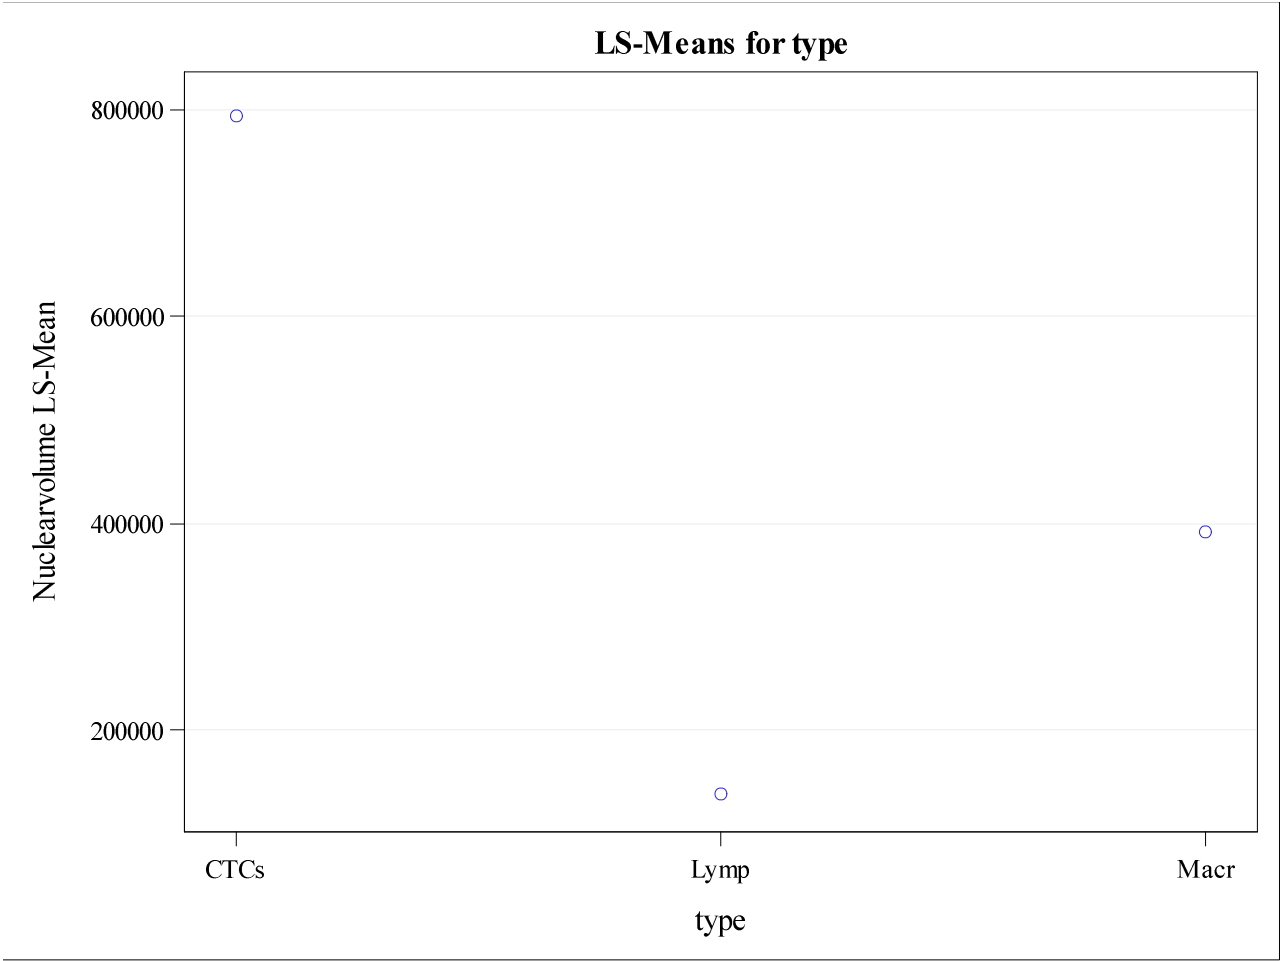

**The GLM Procedure**  
**Least Squares Means**

pt=16AA7320

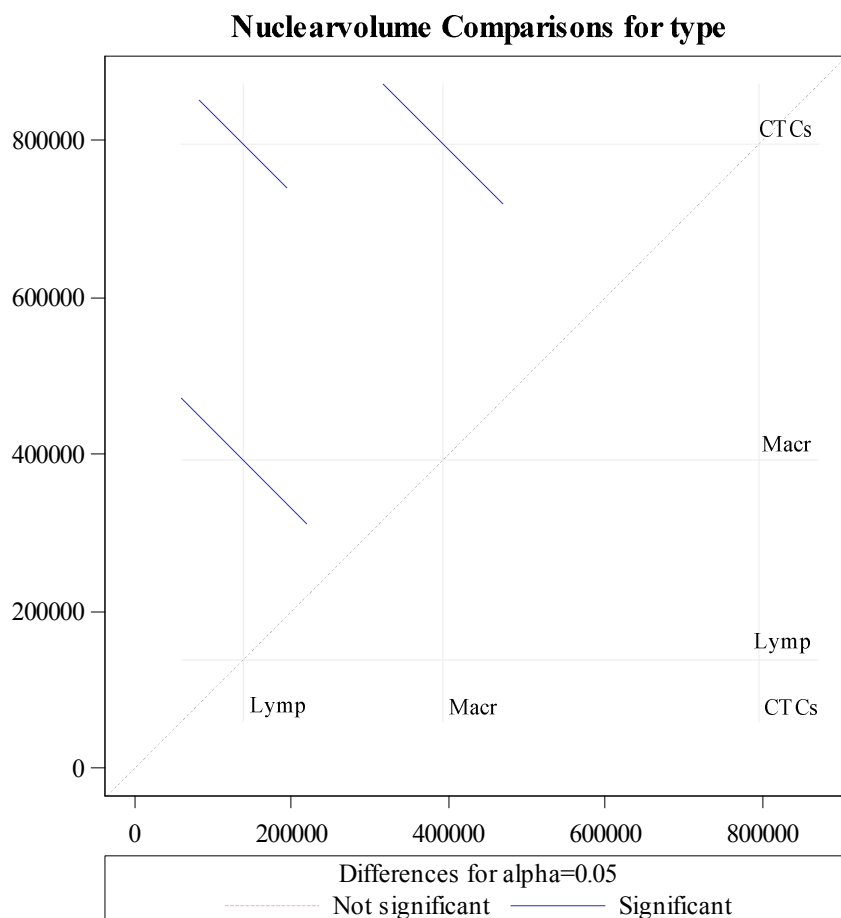

| type  | telomereperkv<br>LSMEAN | Standard<br>Error | Pr >  t | LSMEAN<br>Number |
|-------|-------------------------|-------------------|---------|------------------|
| CTCs  | 0.10027269              | 0.00674072        | <.0001  | 1                |
| Lymph | 0.15702634              | 0.00788020        | <.0001  | 2                |
| Macr  | 0.07490989              | 0.01245969        | <.0001  | 3                |

| Least Squares Means for effect type<br>Pr >  t  for H0: LSMean(i)=LSMean(j) |        |        |        |
|-----------------------------------------------------------------------------|--------|--------|--------|
| Dependent Variable: telomereperkv                                           |        |        |        |
| i/j                                                                         | 1      | 2      | 3      |
| 1                                                                           |        | <.0001 | 0.0772 |
| 2                                                                           | <.0001 |        | <.0001 |
| 3                                                                           | 0.0772 | <.0001 |        |

*The GLM Procedure*  
*Least Squares Means*

pt=16AA7320

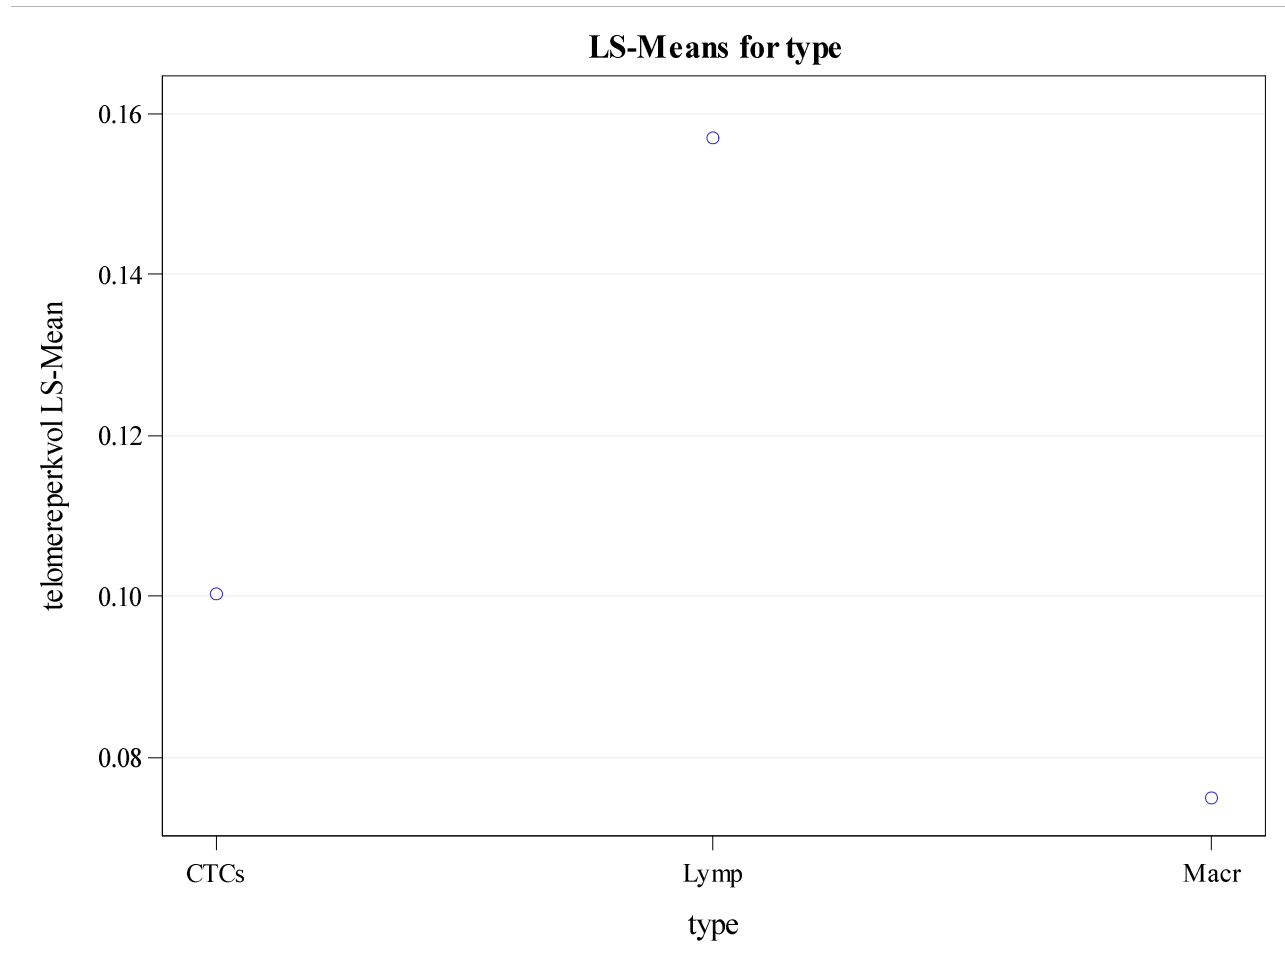

*The GLM Procedure*  
*Least Squares Means*

pt=16AA7320

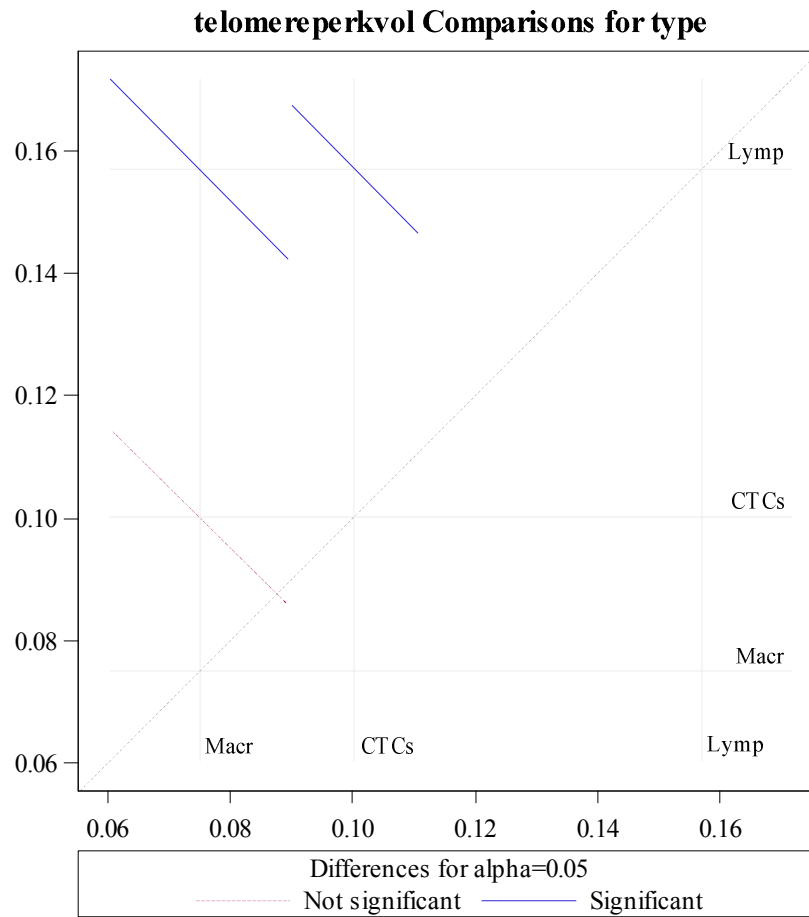

**Note:** To ensure overall protection level, only probabilities associated with pre-planned comparisons should be used.



***The GLM Procedure*****pt=16AA8528**

| Class Level Information |        |                 |
|-------------------------|--------|-----------------|
| Class                   | Levels | Values          |
| type                    | 3      | CTCs Lymph Macr |

|                             |    |
|-----------------------------|----|
| Number of Observations Read | 44 |
| Number of Observations Used | 44 |

**The GLM Procedure**

**Dependent Variable: Totalnofsignals**  
**Totalnofsignals**

pt=16AA8528

| Source                 | DF | Sum of Squares | Mean Square | F Value | Pr > F |
|------------------------|----|----------------|-------------|---------|--------|
| <b>Model</b>           | 2  | 78821.6594     | 39410.8297  | 10.78   | 0.0002 |
| <b>Error</b>           | 41 | 149868.2270    | 3655.3226   |         |        |
| <b>Corrected Total</b> | 43 | 228689.8864    |             |         |        |

| R-Square | Coeff Var | Root MSE | Totalnofsignals Mean |
|----------|-----------|----------|----------------------|
| 0.344666 | 69.22216  | 60.45926 | 87.34091             |

| Source      | DF | Type III SS | Mean Square | F Value | Pr > F |
|-------------|----|-------------|-------------|---------|--------|
| <b>type</b> | 2  | 78821.65935 | 39410.82968 | 10.78   | 0.0002 |

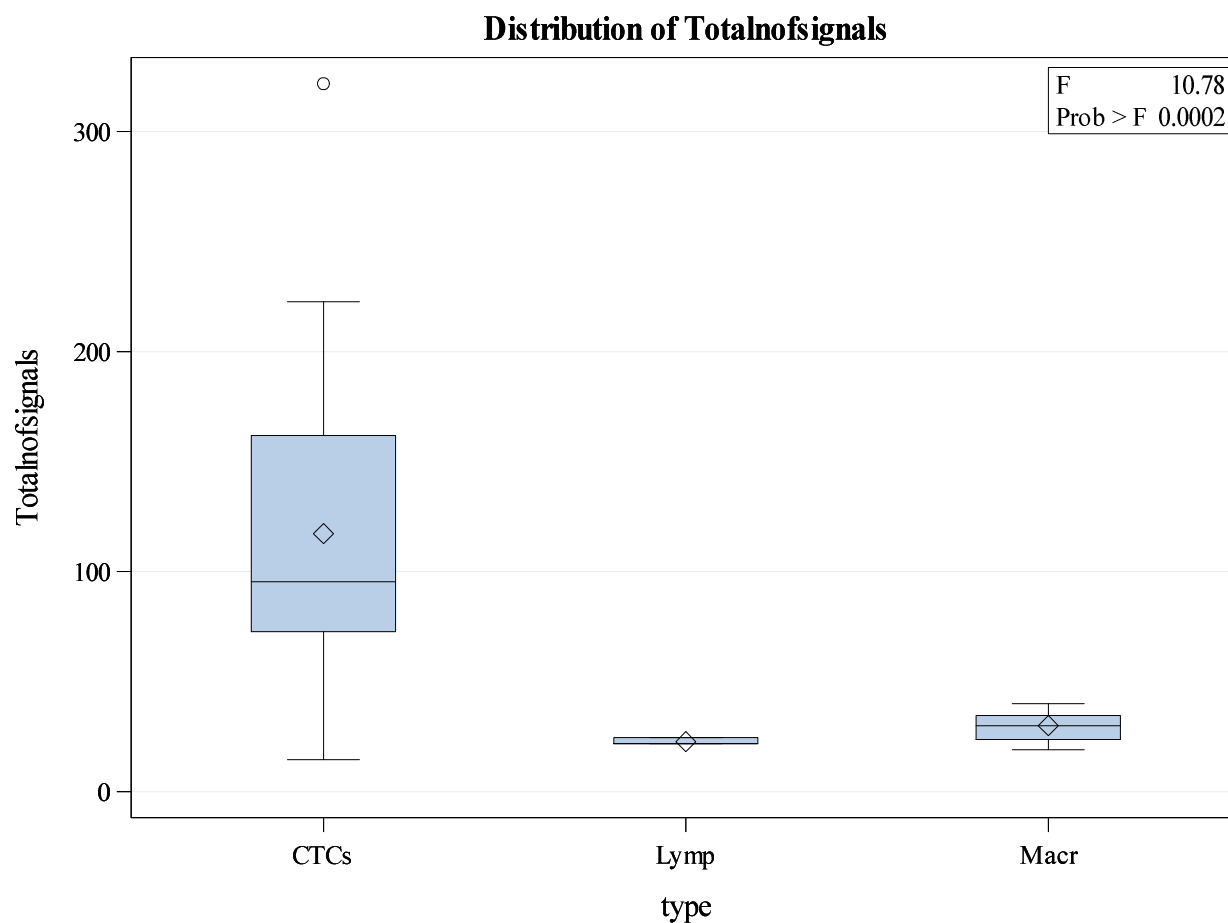

**The GLM Procedure****Dependent Variable: Totalnofaggregates Totalnofaggregates****pt=16AA8528**

| Source          | DF | Sum of Squares | Mean Square | F Value | Pr > F |
|-----------------|----|----------------|-------------|---------|--------|
| Model           | 2  | 1243.575758    | 621.787879  | 9.32    | 0.0005 |
| Error           | 41 | 2735.583333    | 66.721545   |         |        |
| Corrected Total | 43 | 3979.159091    |             |         |        |

| R-Square | Coeff Var | Root MSE | Totalnofaggregates Mean |
|----------|-----------|----------|-------------------------|
| 0.312522 | 80.04595  | 8.168326 | 10.20455                |

| Source | DF | Type III SS | Mean Square | F Value | Pr > F |
|--------|----|-------------|-------------|---------|--------|
| type   | 2  | 1243.575758 | 621.787879  | 9.32    | 0.0005 |

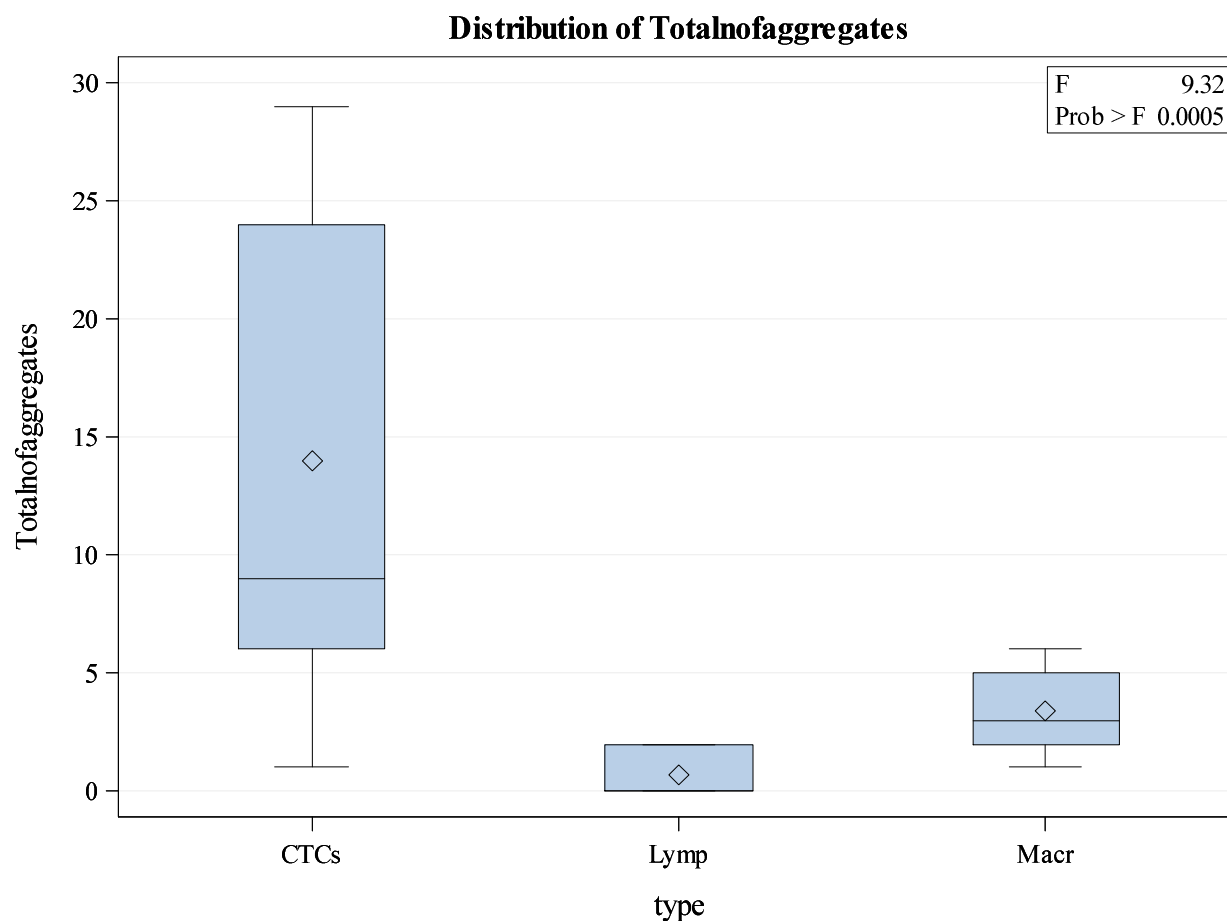

**The GLM Procedure**

**Dependent Variable: acratio**  
**acratio**

**pt=16AA8528**

| Source                 | DF | Sum of Squares | Mean Square | F Value | Pr > F |
|------------------------|----|----------------|-------------|---------|--------|
| <b>Model</b>           | 2  | 4.2694954      | 2.1347477   | 0.29    | 0.7496 |
| <b>Error</b>           | 41 | 301.4895202    | 7.3534029   |         |        |
| <b>Corrected Total</b> | 43 | 305.7590156    |             |         |        |

| R-Square | Coeff Var | Root MSE | acratio Mean |
|----------|-----------|----------|--------------|
| 0.013964 | 69.57107  | 2.711716 | 3.897763     |

| Source      | DF | Type III SS | Mean Square | F Value | Pr > F |
|-------------|----|-------------|-------------|---------|--------|
| <b>type</b> | 2  | 4.26949540  | 2.13474770  | 0.29    | 0.7496 |

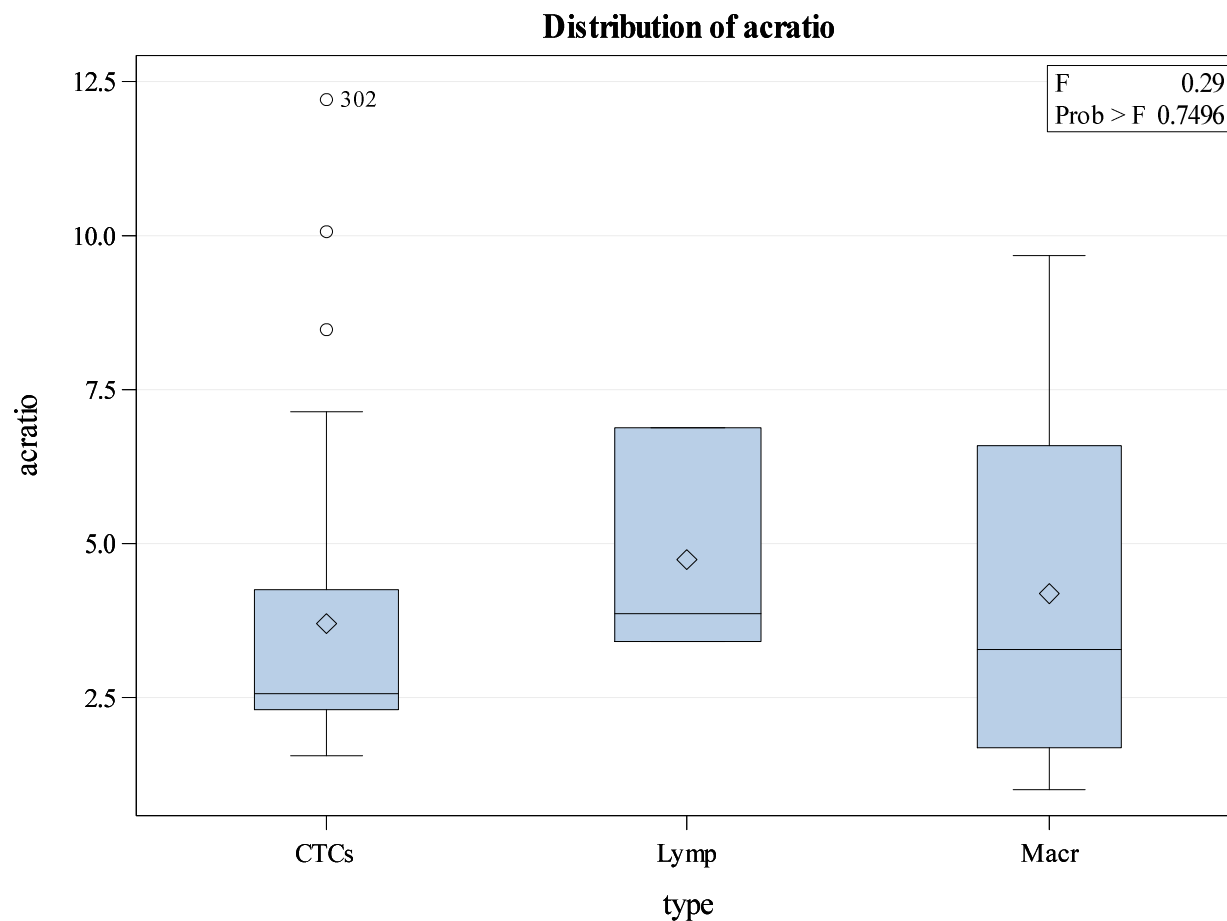

**The GLM Procedure**

**Dependent Variable: AvIntallsignals**  
**AvIntallsignals**

**pt=16AA8528**

| Source                 | DF | Sum of Squares | Mean Square | F Value | Pr > F |
|------------------------|----|----------------|-------------|---------|--------|
| <b>Model</b>           | 2  | 81611616.7     | 40805808.4  | 6.11    | 0.0048 |
| <b>Error</b>           | 41 | 273771248.3    | 6677347.5   |         |        |
| <b>Corrected Total</b> | 43 | 355382865.0    |             |         |        |

| R-Square | Coeff Var | Root MSE | AvIntallsignals Mean |
|----------|-----------|----------|----------------------|
| 0.229644 | 22.06798  | 2584.056 | 11709.53             |

| Source      | DF | Type III SS | Mean Square | F Value | Pr > F |
|-------------|----|-------------|-------------|---------|--------|
| <b>type</b> | 2  | 81611616.75 | 40805808.37 | 6.11    | 0.0048 |

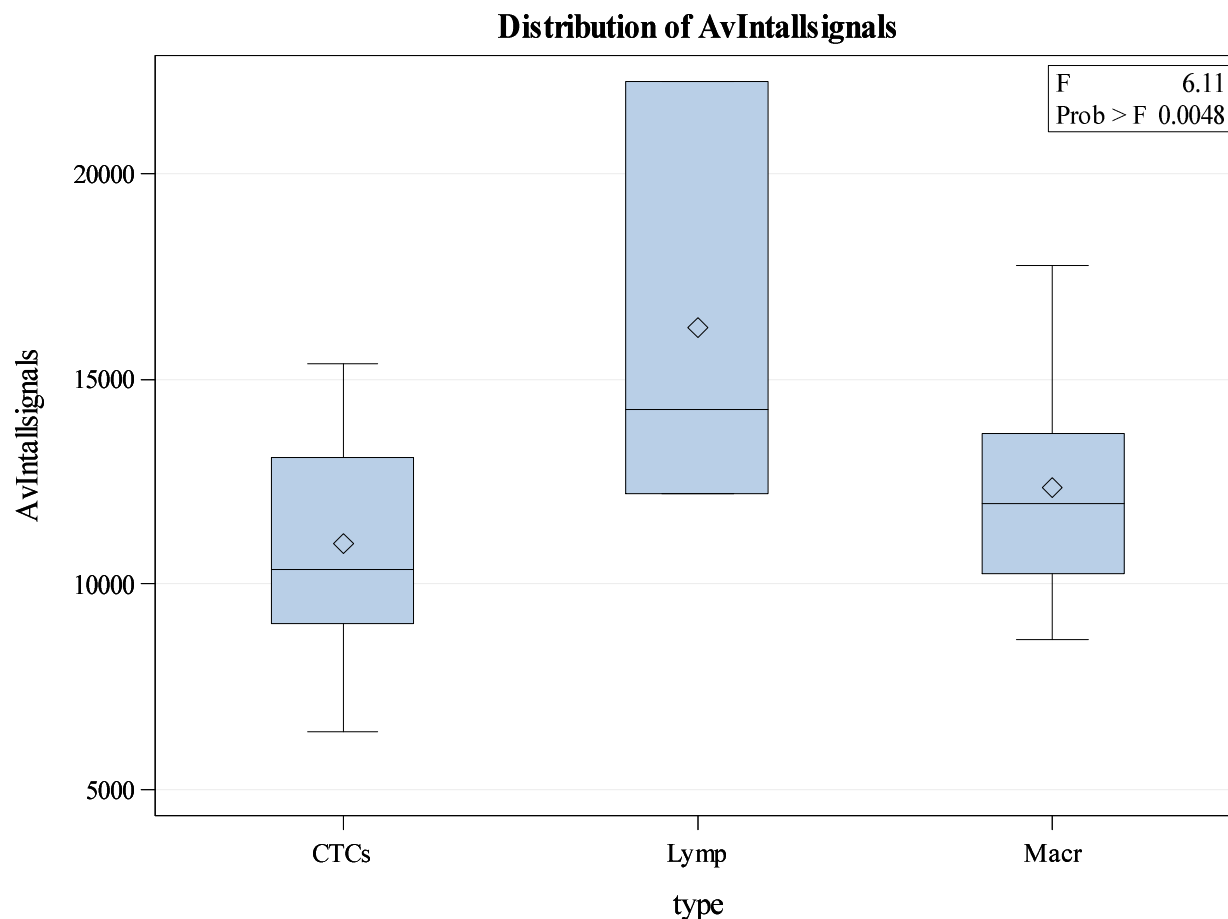

**The GLM Procedure**

**Dependent Variable: Totalintensity**  
**Totalintensity**

**pt=16AA8528**

| Source                 | DF | Sum of Squares | Mean Square  | F Value | Pr > F |
|------------------------|----|----------------|--------------|---------|--------|
| <b>Model</b>           | 2  | 7.5375708E12   | 3.7687854E12 | 10.45   | 0.0002 |
| <b>Error</b>           | 41 | 1.4790674E13   | 360748136812 |         |        |
| <b>Corrected Total</b> | 43 | 2.2328244E13   |              |         |        |

| R-Square | Coeff Var | Root MSE | Totalintensity Mean |
|----------|-----------|----------|---------------------|
| 0.337580 | 63.64346  | 600623.1 | 943731.0            |

| Source      | DF | Type III SS  | Mean Square  | F Value | Pr > F |
|-------------|----|--------------|--------------|---------|--------|
| <b>type</b> | 2  | 7.5375708E12 | 3.7687854E12 | 10.45   | 0.0002 |

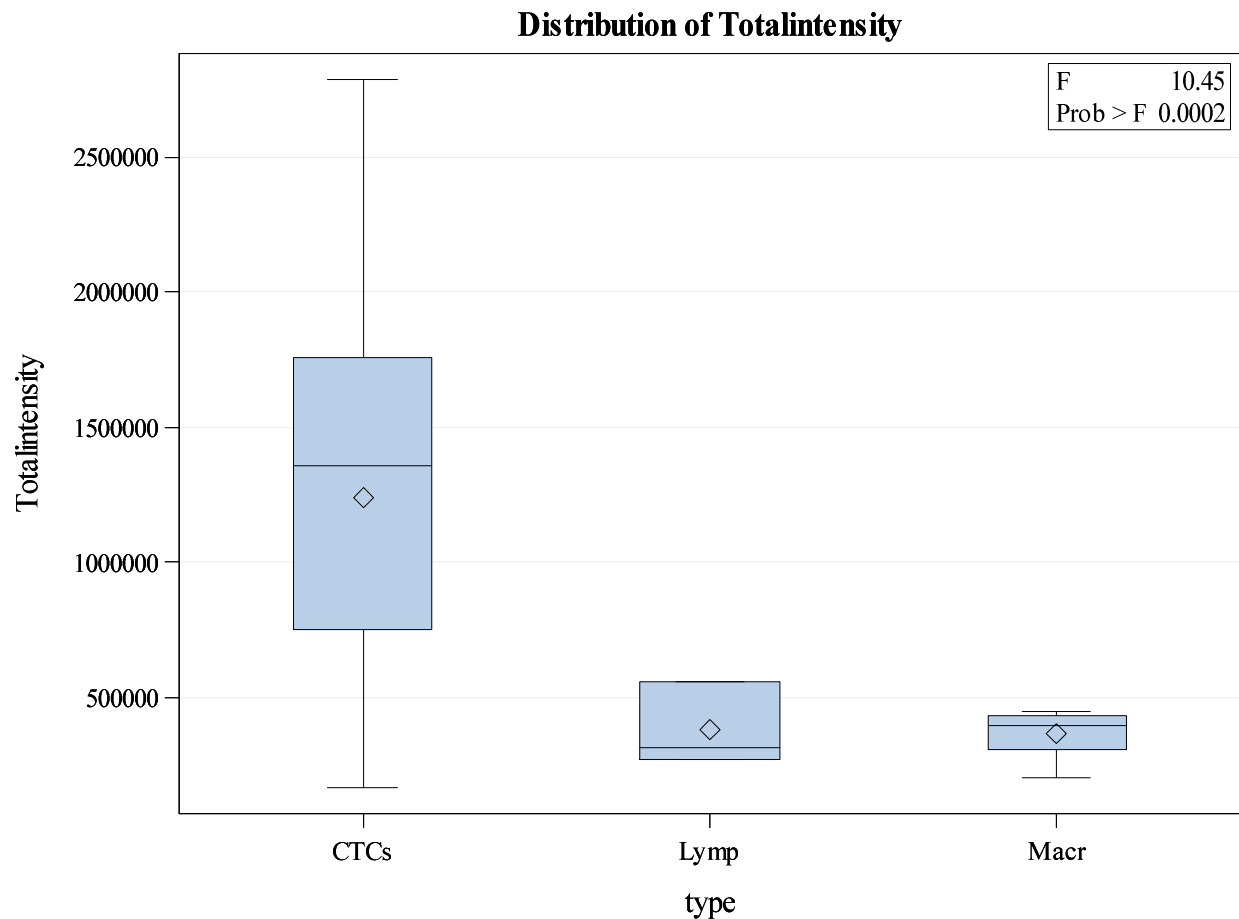

**The GLM Procedure**

**Dependent Variable: Nuclearvolume**  
**Nuclearvolume**

pt=16AA8528

| Source                 | DF | Sum of Squares | Mean Square  | F Value | Pr > F |
|------------------------|----|----------------|--------------|---------|--------|
| <b>Model</b>           | 2  | 2.5587807E12   | 1.2793904E12 | 11.00   | 0.0001 |
| <b>Error</b>           | 41 | 4.7673154E12   | 116275986384 |         |        |
| <b>Corrected Total</b> | 43 | 7.3260961E12   |              |         |        |

| R-Square | Coeff Var | Root MSE | Nuclearvolume Mean |
|----------|-----------|----------|--------------------|
| 0.349269 | 43.16379  | 340992.6 | 789997.0           |

| Source      | DF | Type III SS  | Mean Square  | F Value | Pr > F |
|-------------|----|--------------|--------------|---------|--------|
| <b>type</b> | 2  | 2.5587807E12 | 1.2793904E12 | 11.00   | 0.0001 |

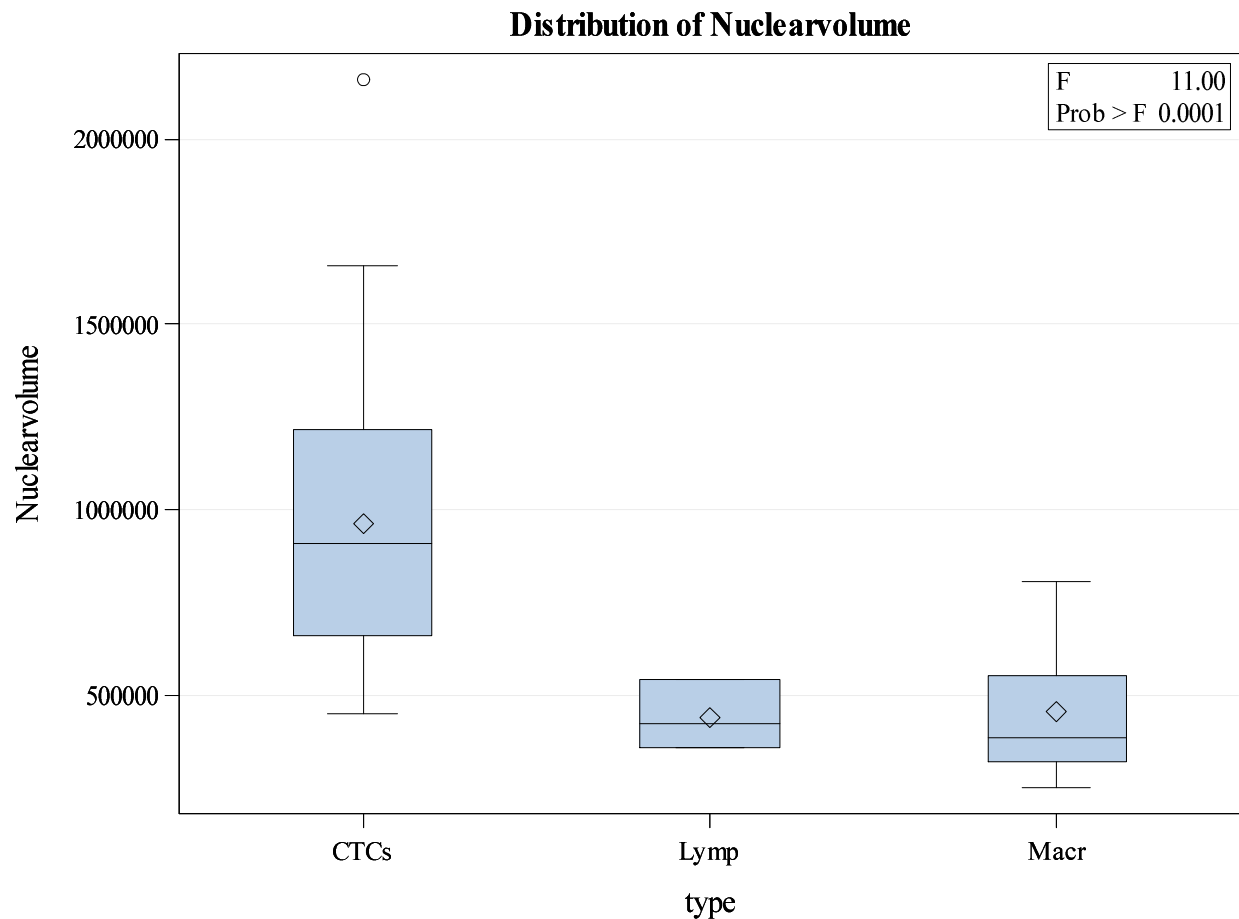

*The GLM Procedure**Dependent Variable: telomereperkvol*

pt=16AA8528

| Source          | DF | Sum of Squares | Mean Square | F Value | Pr > F |
|-----------------|----|----------------|-------------|---------|--------|
| Model           | 2  | 0.03043991     | 0.01521995  | 4.42    | 0.0183 |
| Error           | 41 | 0.14121591     | 0.00344429  |         |        |
| Corrected Total | 43 | 0.17165582     |             |         |        |

| R-Square | Coeff Var | Root MSE | telomereperkvol Mean |
|----------|-----------|----------|----------------------|
| 0.177331 | 56.00607  | 0.058688 | 0.104789             |

| Source | DF | Type III SS | Mean Square | F Value | Pr > F |
|--------|----|-------------|-------------|---------|--------|
| type   | 2  | 0.03043991  | 0.01521995  | 4.42    | 0.0183 |

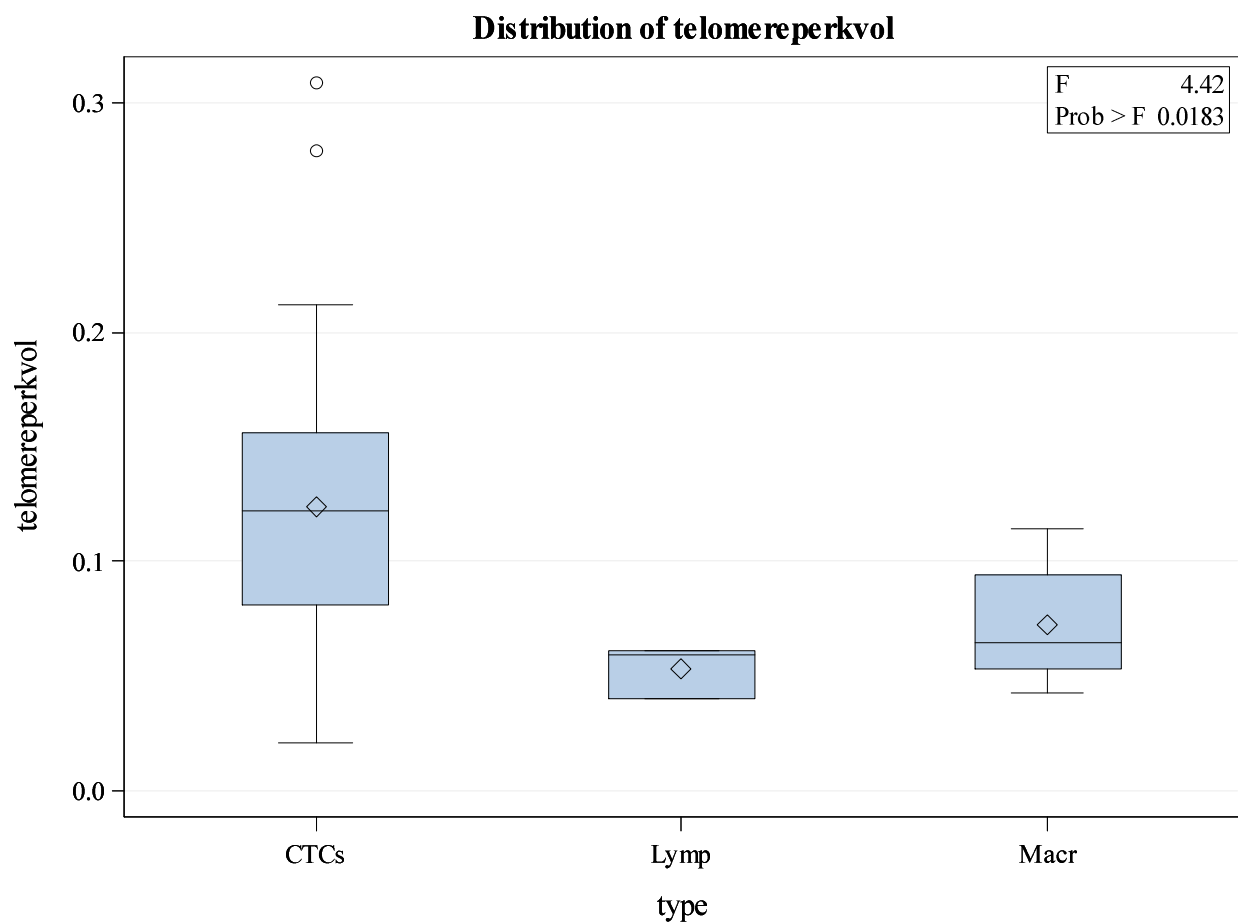



**The GLM Procedure**  
**Least Squares Means**

**pt=16AA8528**

| type        | Totalnofsignals<br>LSMEAN | Standard<br>Error | Pr >  t | LSMEAN<br>Number |
|-------------|---------------------------|-------------------|---------|------------------|
| <b>CTCs</b> | 117.758621                | 11.227003         | <.0001  | 1                |
| <b>Lymp</b> | 23.000000                 | 34.906172         | 0.5136  | 2                |
| <b>Macr</b> | 29.916667                 | 17.453086         | 0.0941  | 3                |

| Least Squares Means for effect type<br>Pr >  t  for H0: LSMean(i)=LSMean(j) |        |        |        |
|-----------------------------------------------------------------------------|--------|--------|--------|
| Dependent Variable: Totalnofsignals                                         |        |        |        |
| i/j                                                                         | 1      | 2      | 3      |
| 1                                                                           |        | 0.0134 | 0.0001 |
| 2                                                                           | 0.0134 |        | 0.8602 |
| 3                                                                           | 0.0001 | 0.8602 |        |

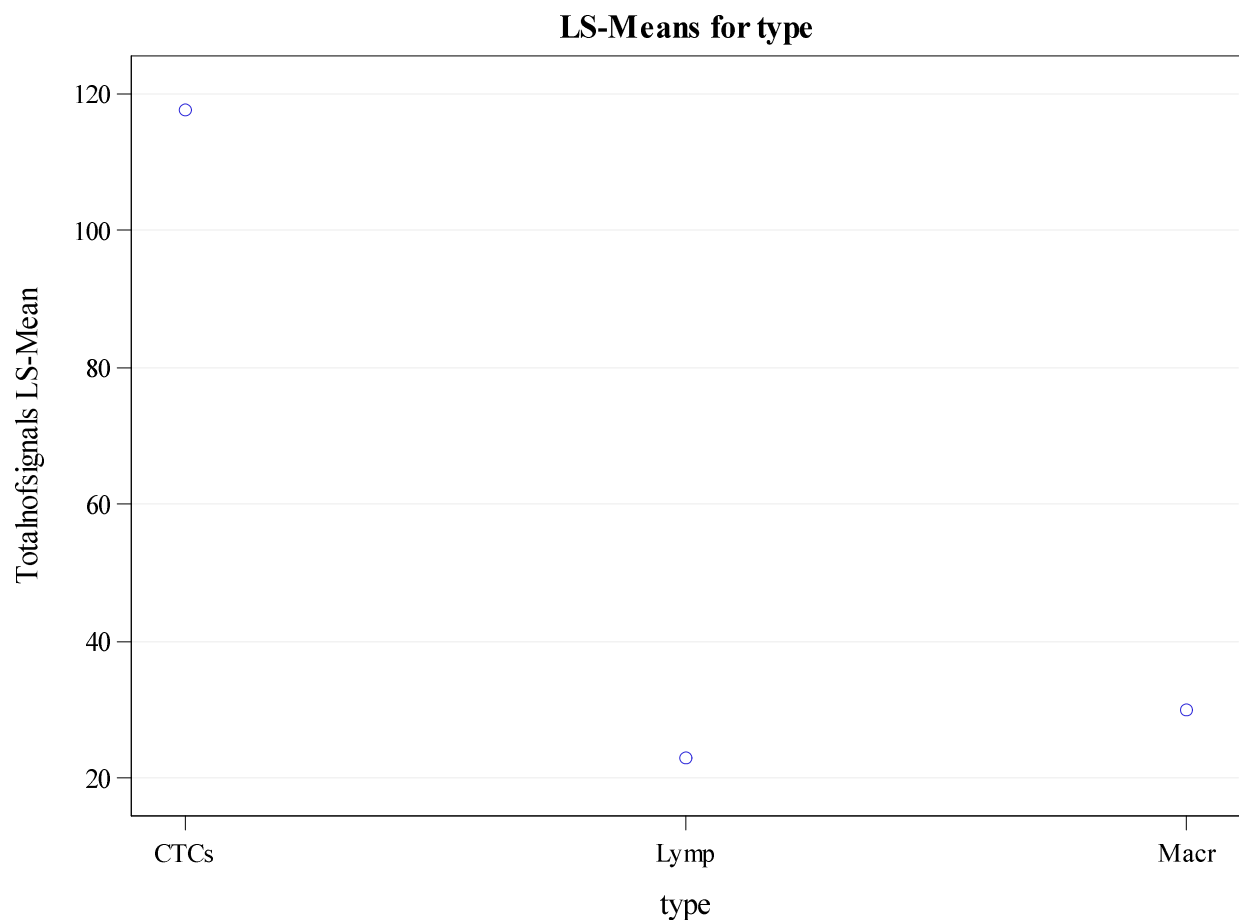

***The GLM Procedure***  
***Least Squares Means***

**pt=16AA8528**

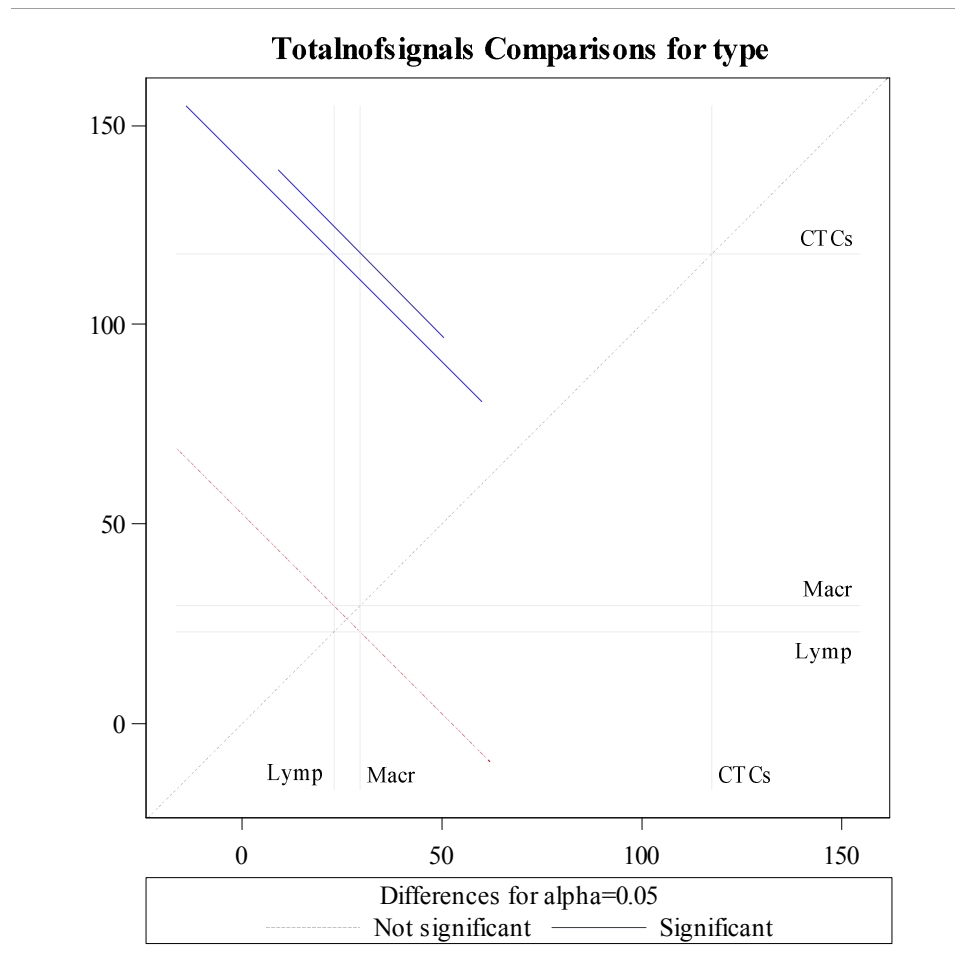

| type        | Totalnofaggregates<br>LSMEAN | Standard<br>Error | Pr >  t | LSMEAN<br>Number |
|-------------|------------------------------|-------------------|---------|------------------|
| <b>CTCs</b> | 14.0000000                   | 1.5168200         | <.0001  | 1                |
| <b>Lymp</b> | 0.6666667                    | 4.7159850         | 0.8883  | 2                |
| <b>Macr</b> | 3.4166667                    | 2.3579925         | 0.1550  | 3                |

*The GLM Procedure*  
*Least Squares Means*

pt=16AA8528

| Least Squares Means for effect type<br>Pr >  t  for H0: LSMean(i)=LSMean(j) |        |        |        |
|-----------------------------------------------------------------------------|--------|--------|--------|
| Dependent Variable: Totalnofaggregates                                      |        |        |        |
| i/j                                                                         | 1      | 2      | 3      |
| 1                                                                           |        | 0.0102 | 0.0005 |
| 2                                                                           | 0.0102 |        | 0.6048 |
| 3                                                                           | 0.0005 | 0.6048 |        |

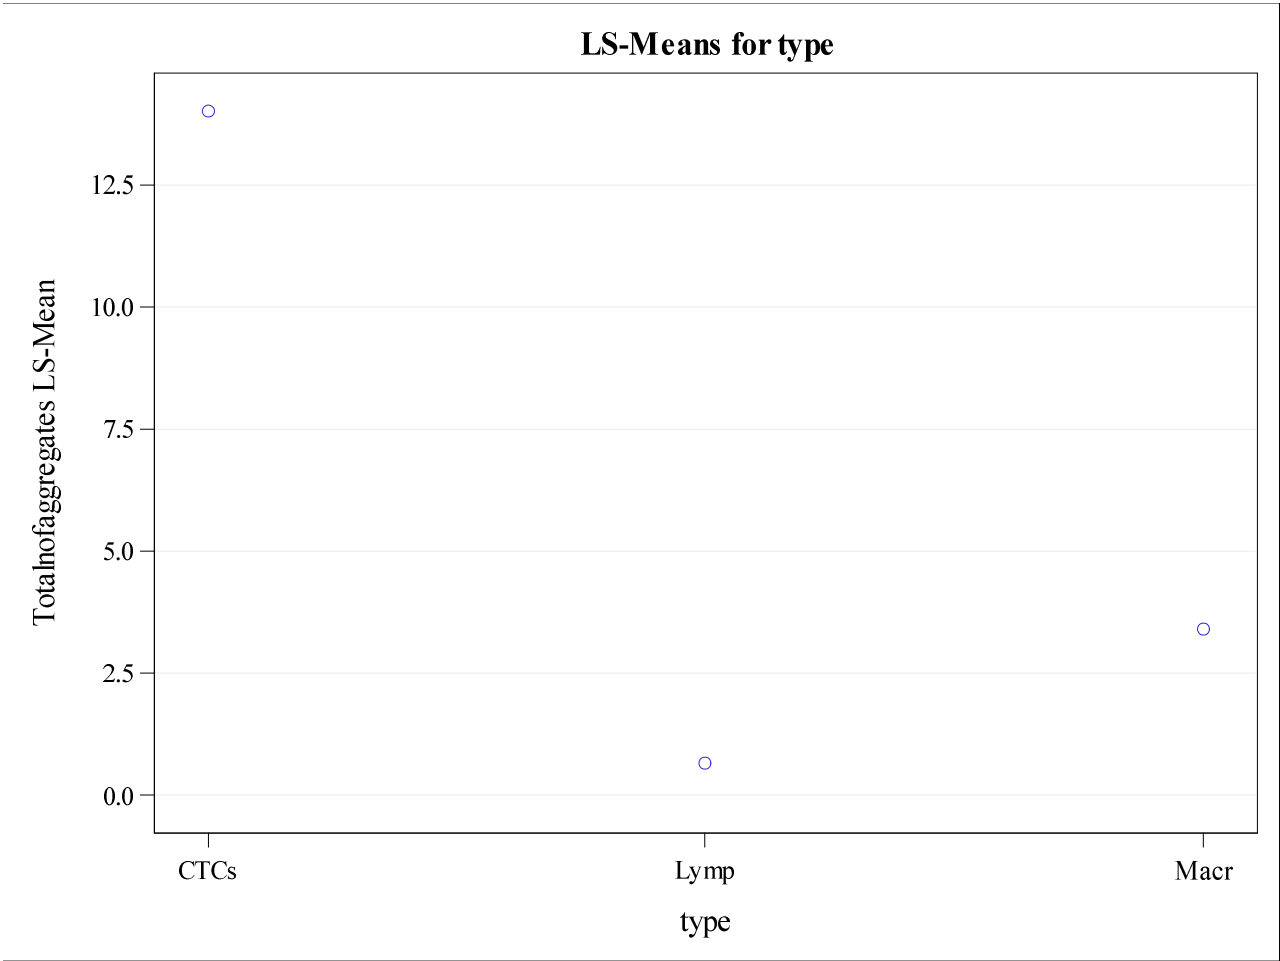

**The GLM Procedure**  
**Least Squares Means**

pt=16AA8528

**Totalnofaggregates Comparisons for type**

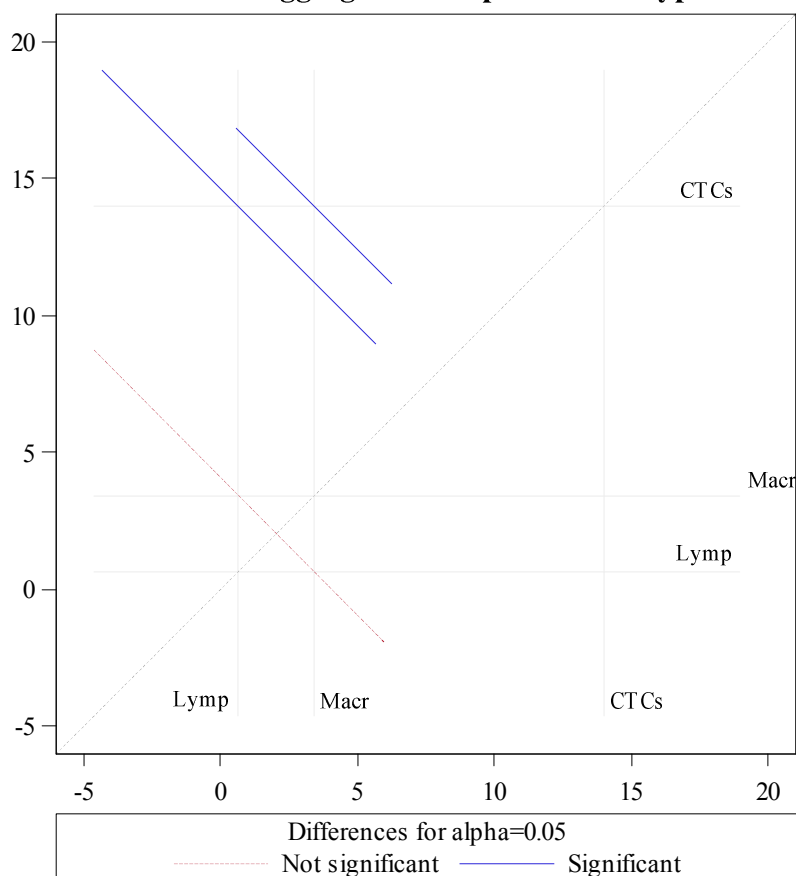

| type        | acratio<br>LSMEAN | Standard<br>Error | Pr >  t | LSMEAN<br>Number |
|-------------|-------------------|-------------------|---------|------------------|
| <b>CTCs</b> | 3.69249093        | 0.50355299        | <.0001  | 1                |
| <b>Lymp</b> | 4.72203744        | 1.56560988        | 0.0044  | 2                |
| <b>Macr</b> | 4.18776994        | 0.78280494        | <.0001  | 3                |

| Least Squares Means for effect type<br>Pr >  t  for H0: LSMean(i)=LSMean(j) |        |        |        |
|-----------------------------------------------------------------------------|--------|--------|--------|
| Dependent Variable: acratio                                                 |        |        |        |
| i/j                                                                         | 1      | 2      | 3      |
| 1                                                                           |        | 0.5348 | 0.5975 |
| 2                                                                           | 0.5348 |        | 0.7617 |
| 3                                                                           | 0.5975 | 0.7617 |        |

*The GLM Procedure*  
*Least Squares Means*

pt=16AA8528

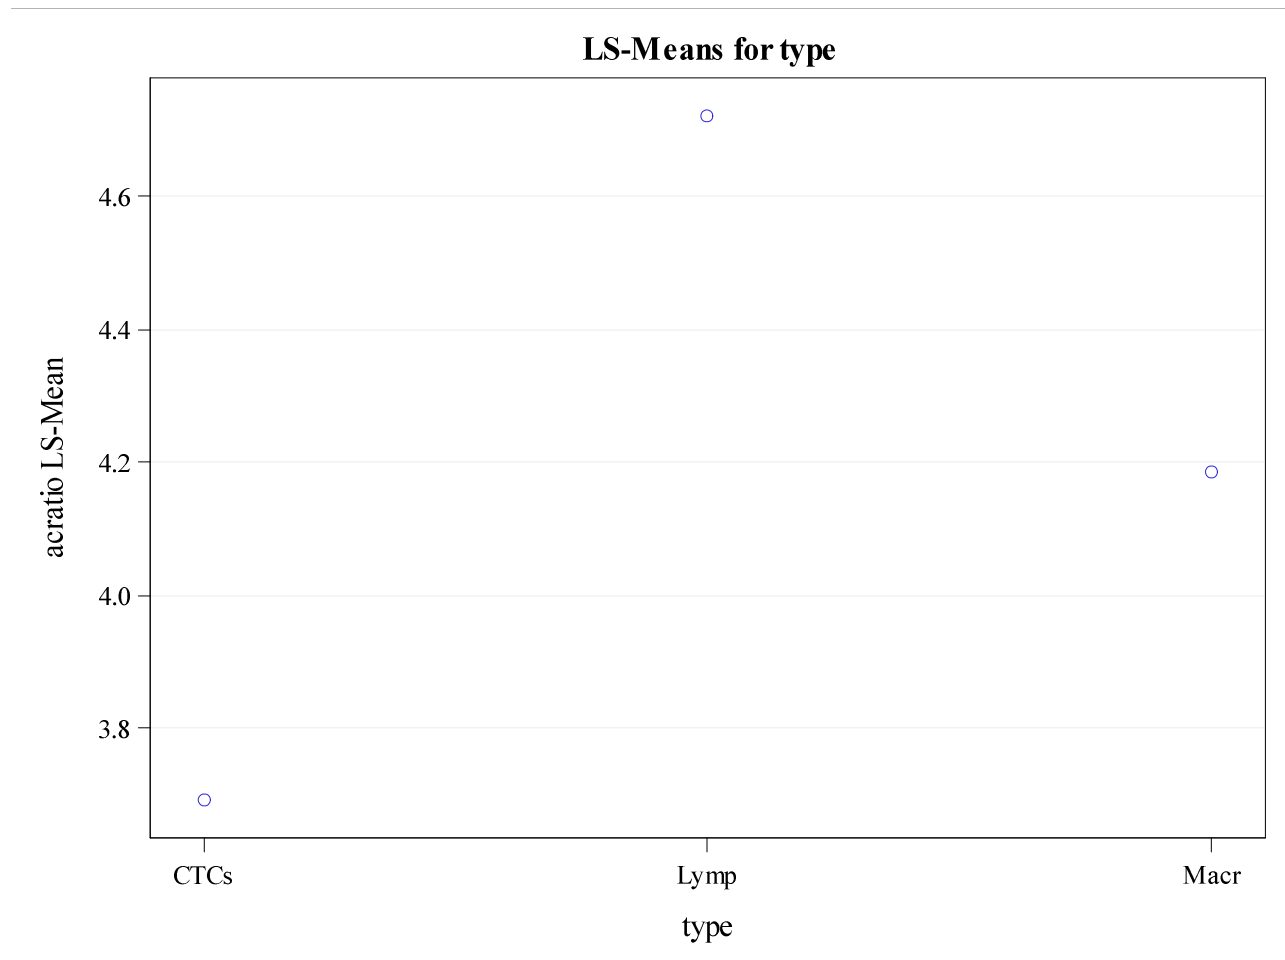

***The GLM Procedure***  
***Least Squares Means***

**pt=16AA8528**

**acratio Comparisons for type**

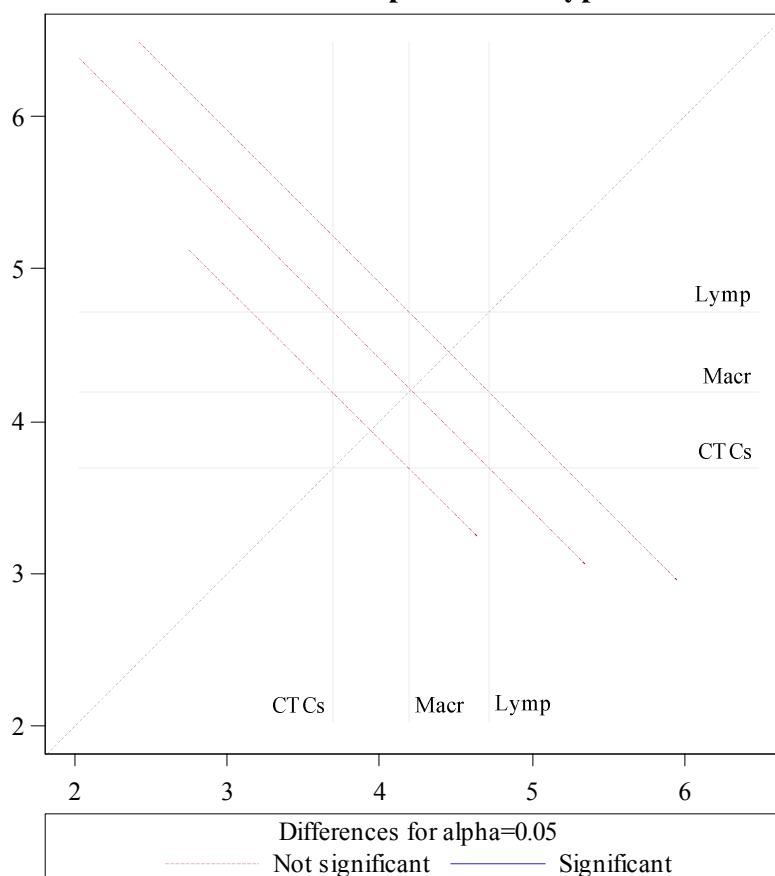

| type        | AvIntallsignals<br>LSMEAN | Standard<br>Error | Pr >  t | LSMEAN<br>Number |
|-------------|---------------------------|-------------------|---------|------------------|
| <b>CTCs</b> | 10980.7677                | 479.8472          | <.0001  | 1                |
| <b>Lymp</b> | 16235.4497                | 1491.9057         | <.0001  | 2                |
| <b>Macr</b> | 12339.2143                | 745.9528          | <.0001  | 3                |

| Least Squares Means for effect type<br>Pr >  t  for H0: LSMean(i)=LSMean(j) |        |        |        |
|-----------------------------------------------------------------------------|--------|--------|--------|
| Dependent Variable: AvIntallsignals                                         |        |        |        |
| i/j                                                                         | 1      | 2      | 3      |
| <b>1</b>                                                                    |        | 0.0017 | 0.1333 |
| <b>2</b>                                                                    | 0.0017 |        | 0.0245 |
| <b>3</b>                                                                    | 0.1333 | 0.0245 |        |

*The GLM Procedure*  
*Least Squares Means*

pt=16AA8528

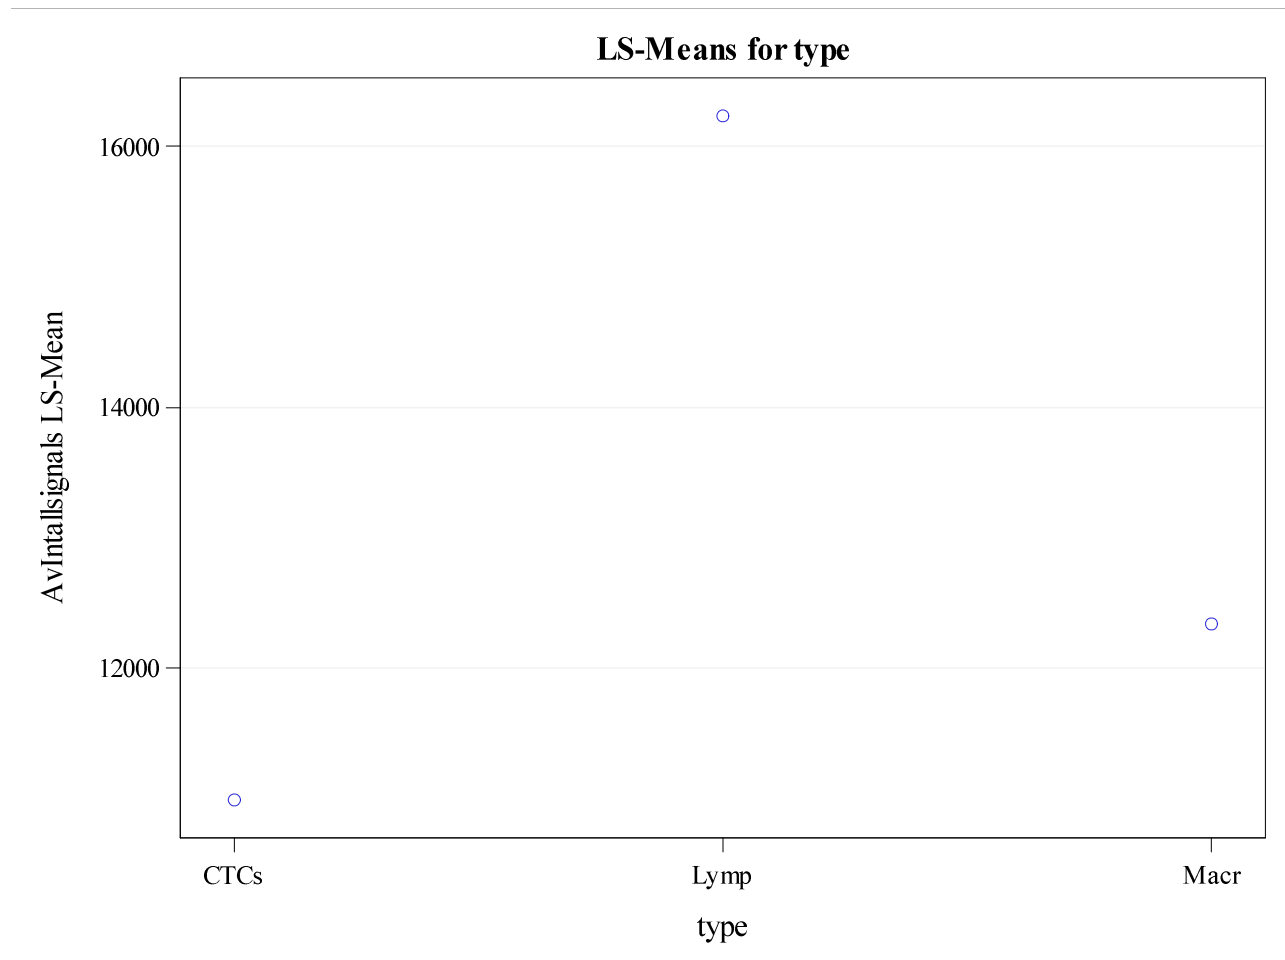

***The GLM Procedure***  
***Least Squares Means***

**pt=16AA8528**

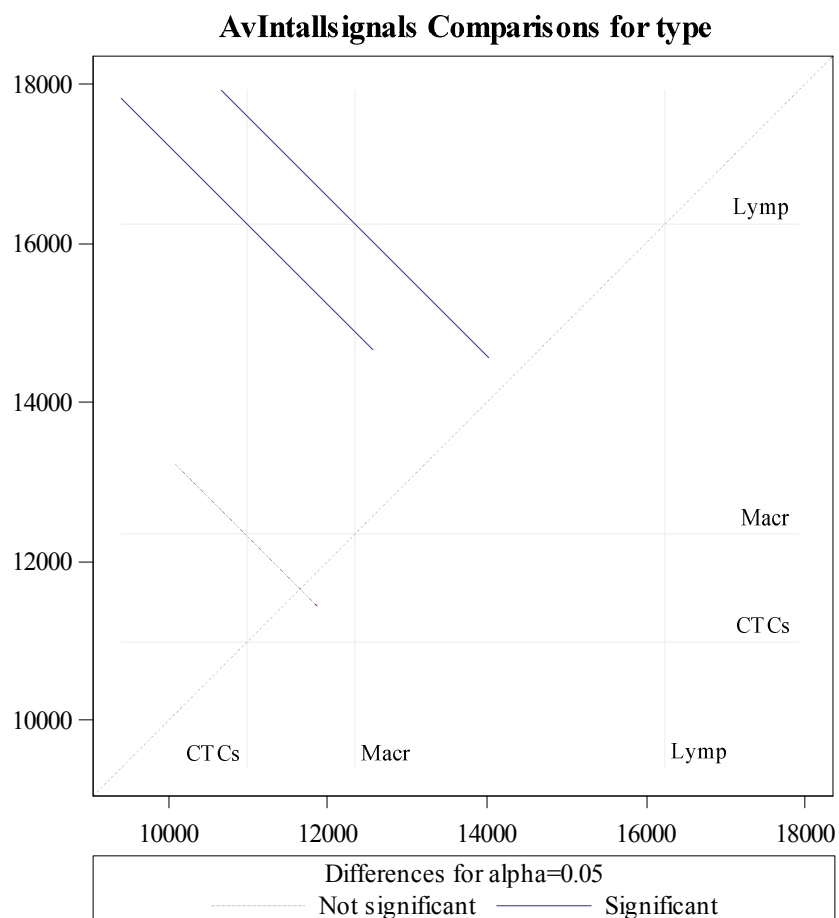

| type        | Totalintensity<br>LSMEAN | Standard<br>Error | Pr >  t | LSMEAN<br>Number |
|-------------|--------------------------|-------------------|---------|------------------|
| <b>CTCs</b> | 1241392.45               | 111532.91         | <.0001  | 1                |
| <b>Lymp</b> | 379418.33                | 346769.92         | 0.2803  | 2                |
| <b>Macr</b> | 365460.83                | 173384.96         | 0.0412  | 3                |

| Least Squares Means for effect type<br>Pr >  t  for H0: LSMean(i)=LSMean(j) |        |        |        |
|-----------------------------------------------------------------------------|--------|--------|--------|
| Dependent Variable: Totalintensity                                          |        |        |        |
| i/j                                                                         | 1      | 2      | 3      |
| 1                                                                           |        | 0.0228 | 0.0001 |
| 2                                                                           | 0.0228 |        | 0.9715 |
| 3                                                                           | 0.0001 | 0.9715 |        |



*The GLM Procedure*  
*Least Squares Means*

pt=16AA8528

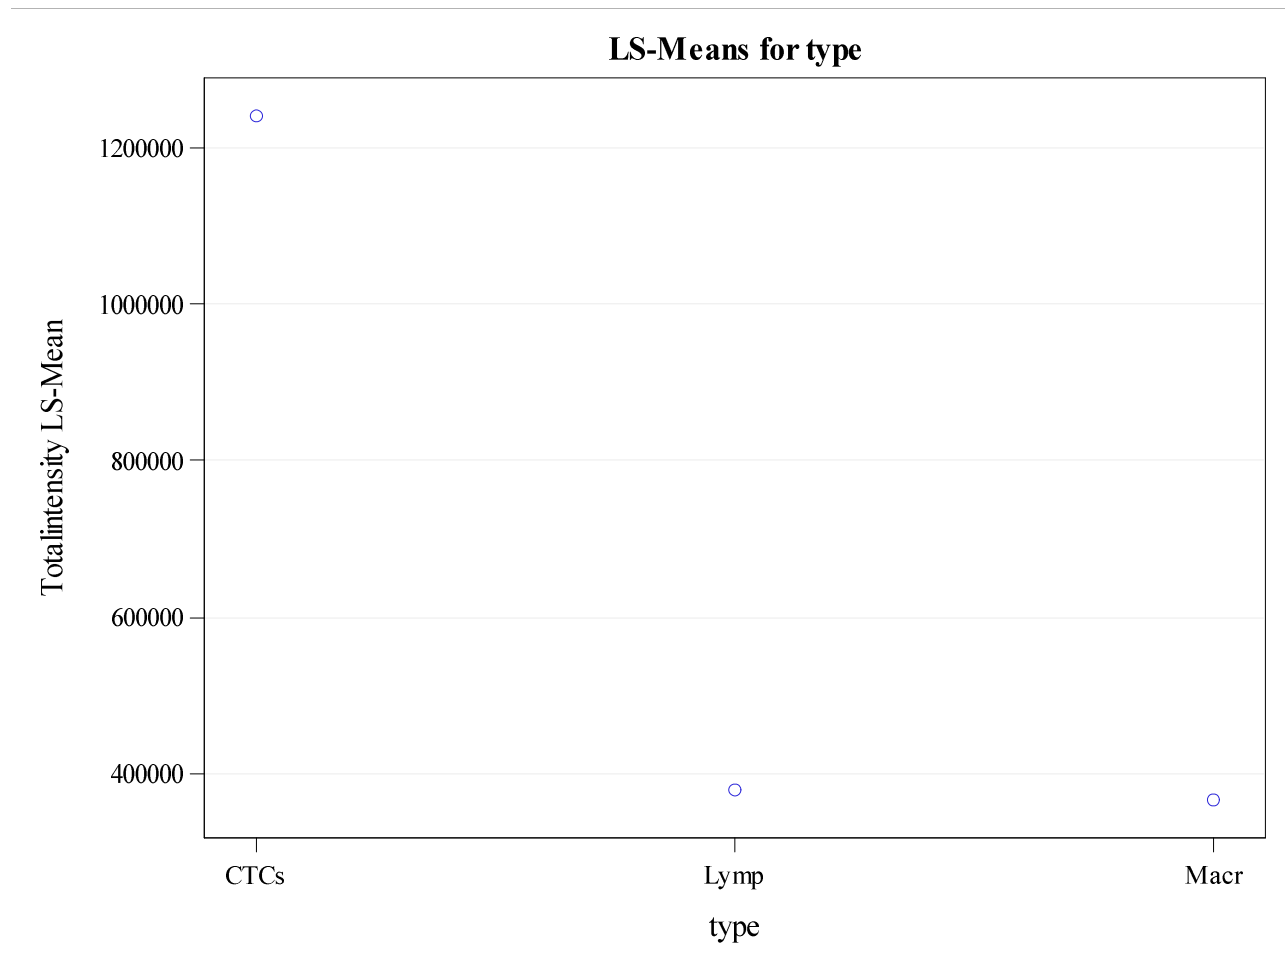

**The GLM Procedure**  
**Least Squares Means**

pt=16AA8528

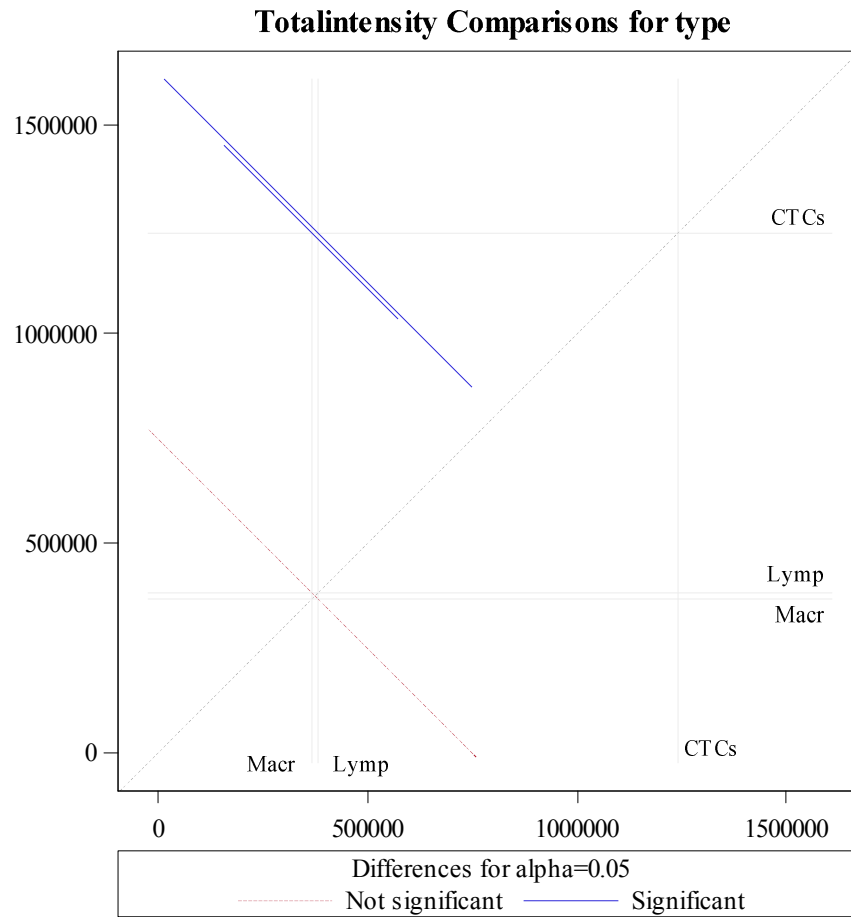

| type | Nuclearvolume<br>LSMEAN | Standard<br>Error | Pr >  t | LSMEAN<br>Number |
|------|-------------------------|-------------------|---------|------------------|
| CTCs | 963410.207              | 63320.745         | <.0001  | 1                |
| Lymp | 441620.333              | 196872.197        | 0.0304  | 2                |
| Macr | 458009.333              | 98436.099         | <.0001  | 3                |

| Least Squares Means for effect type<br>Pr >  t  for H0: LSMean(i)=LSMean(j) |        |        |        |
|-----------------------------------------------------------------------------|--------|--------|--------|
| Dependent Variable: Nuclearvolume                                           |        |        |        |
| i/j                                                                         | 1      | 2      | 3      |
| 1                                                                           |        | 0.0156 | <.0001 |
| 2                                                                           | 0.0156 |        | 0.9410 |
| 3                                                                           | <.0001 | 0.9410 |        |

*The GLM Procedure*  
*Least Squares Means*

pt=16AA8528

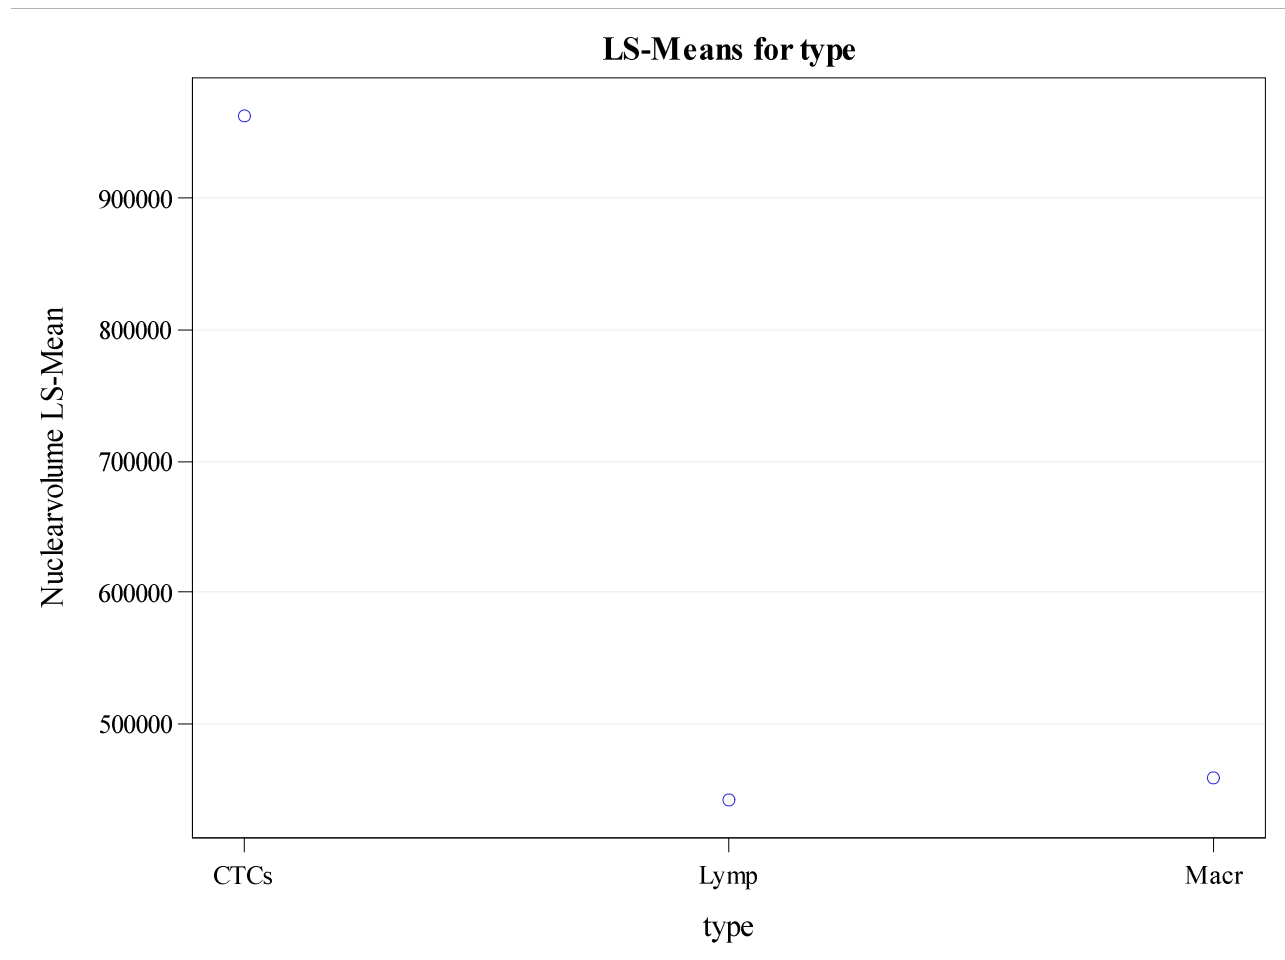

***The GLM Procedure***  
***Least Squares Means***

**pt=16AA8528**

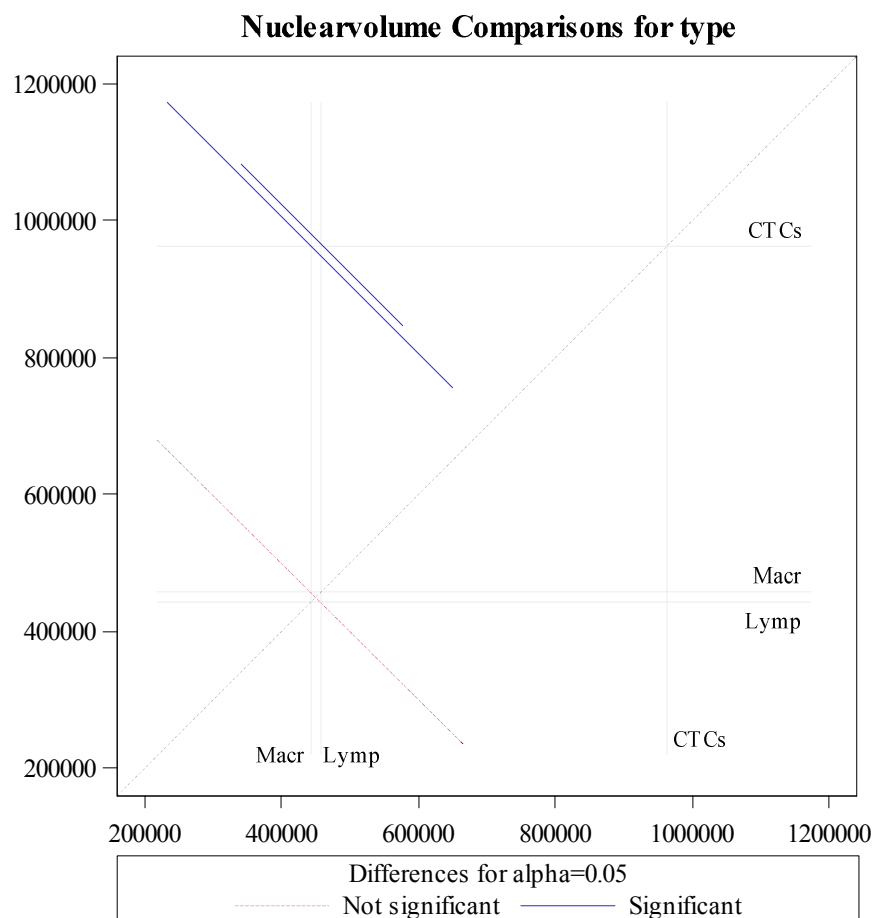

| type         | telomereperkvol<br>LSMEAN | Standard<br>Error | Pr >  t | LSMEAN<br>Number |
|--------------|---------------------------|-------------------|---------|------------------|
| <b>CTCs</b>  | 0.12343677                | 0.01089810        | <.0001  | 1                |
| <b>Lymph</b> | 0.05360820                | 0.03388358        | 0.1213  | 2                |
| <b>Macr</b>  | 0.07251796                | 0.01694179        | 0.0001  | 3                |

| Least Squares Means for effect type<br>Pr >  t  for H0: LSMean(i)=LSMean(j) |        |        |        |
|-----------------------------------------------------------------------------|--------|--------|--------|
| Dependent Variable: telomereperkvol                                         |        |        |        |
| i/j                                                                         | 1      | 2      | 3      |
| 1                                                                           |        | 0.0566 | 0.0154 |
| 2                                                                           | 0.0566 |        | 0.6203 |
| 3                                                                           | 0.0154 | 0.6203 |        |

*The GLM Procedure*  
*Least Squares Means*

pt=16AA8528

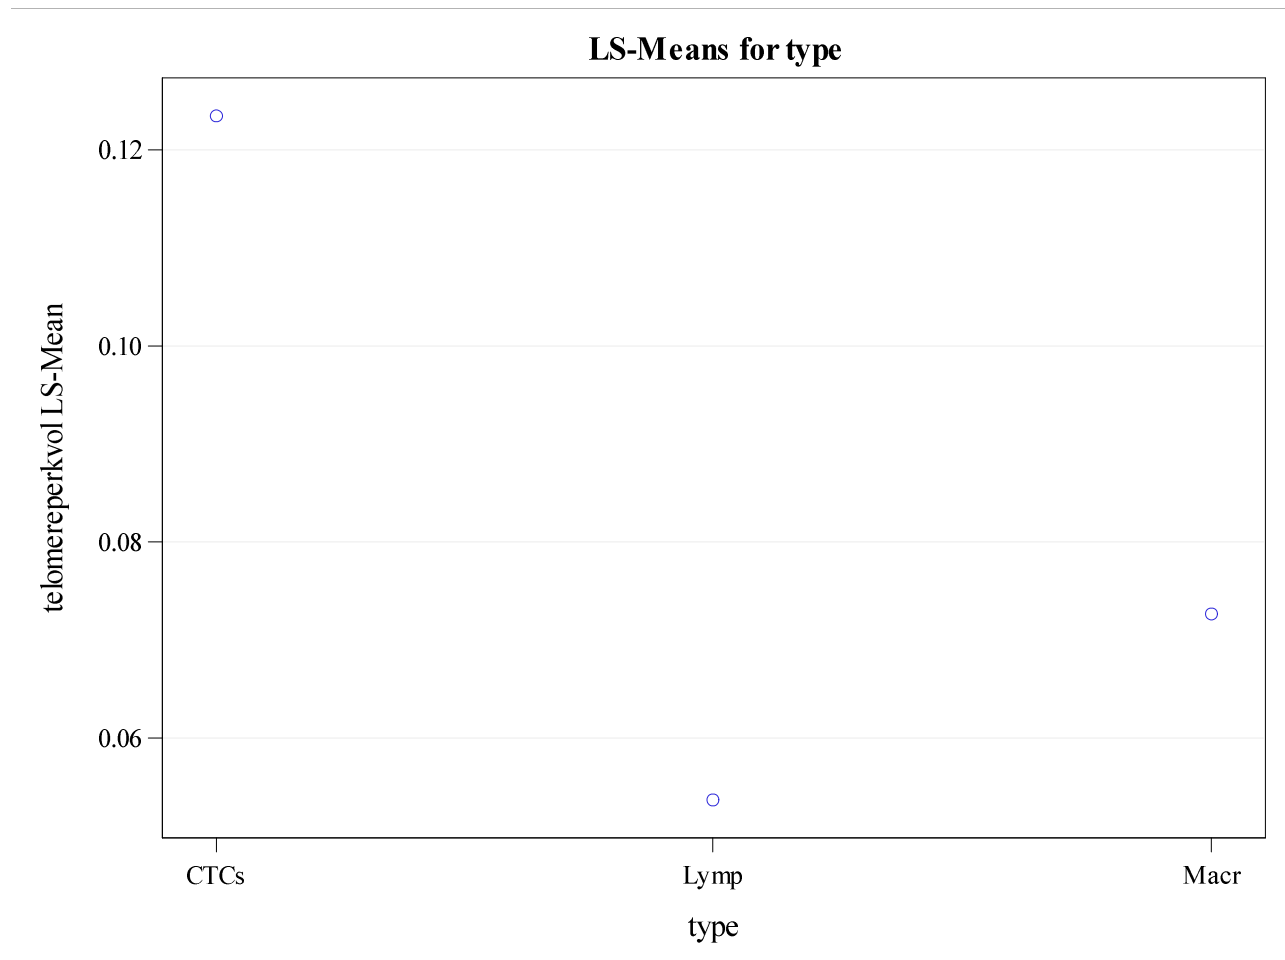

*The GLM Procedure*  
*Least Squares Means*

pt=16AA8528

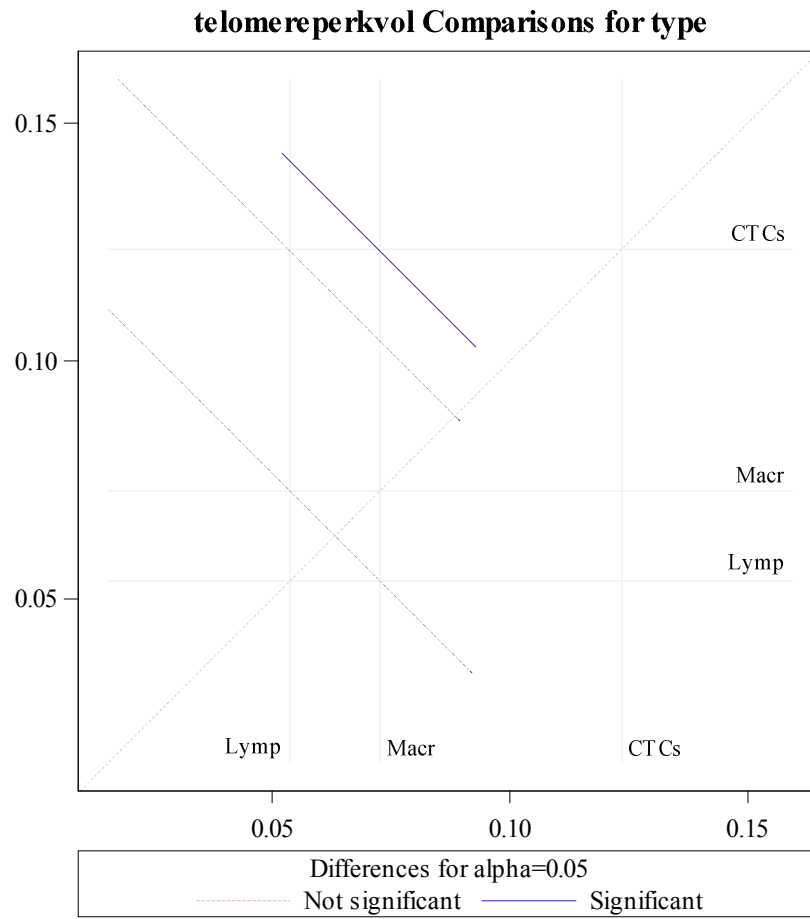

**Note:** To ensure overall protection level, only probabilities associated with pre-planned comparisons should be used.

*The GLM Procedure*

pt=16AB0258

| Class Level Information |        |                 |
|-------------------------|--------|-----------------|
| Class                   | Levels | Values          |
| type                    | 3      | CTCs Lymph Macr |

|                             |    |
|-----------------------------|----|
| Number of Observations Read | 24 |
| Number of Observations Used | 24 |

**The GLM Procedure**

**Dependent Variable: Totalnofsignals**  
**Totalnofsignals**

**pt=16AB0258**

| Source                 | DF | Sum of Squares | Mean Square | F Value | Pr > F |
|------------------------|----|----------------|-------------|---------|--------|
| <b>Model</b>           | 2  | 73685.7250     | 36842.8625  | 12.36   | 0.0003 |
| <b>Error</b>           | 21 | 62609.2333     | 2981.3921   |         |        |
| <b>Corrected Total</b> | 23 | 136294.9583    |             |         |        |

| R-Square | Coeff Var | Root MSE | Totalnofsignals Mean |
|----------|-----------|----------|----------------------|
| 0.540634 | 81.44506  | 54.60213 | 67.04167             |

| Source      | DF | Type III SS | Mean Square | F Value | Pr > F |
|-------------|----|-------------|-------------|---------|--------|
| <b>type</b> | 2  | 73685.72500 | 36842.86250 | 12.36   | 0.0003 |

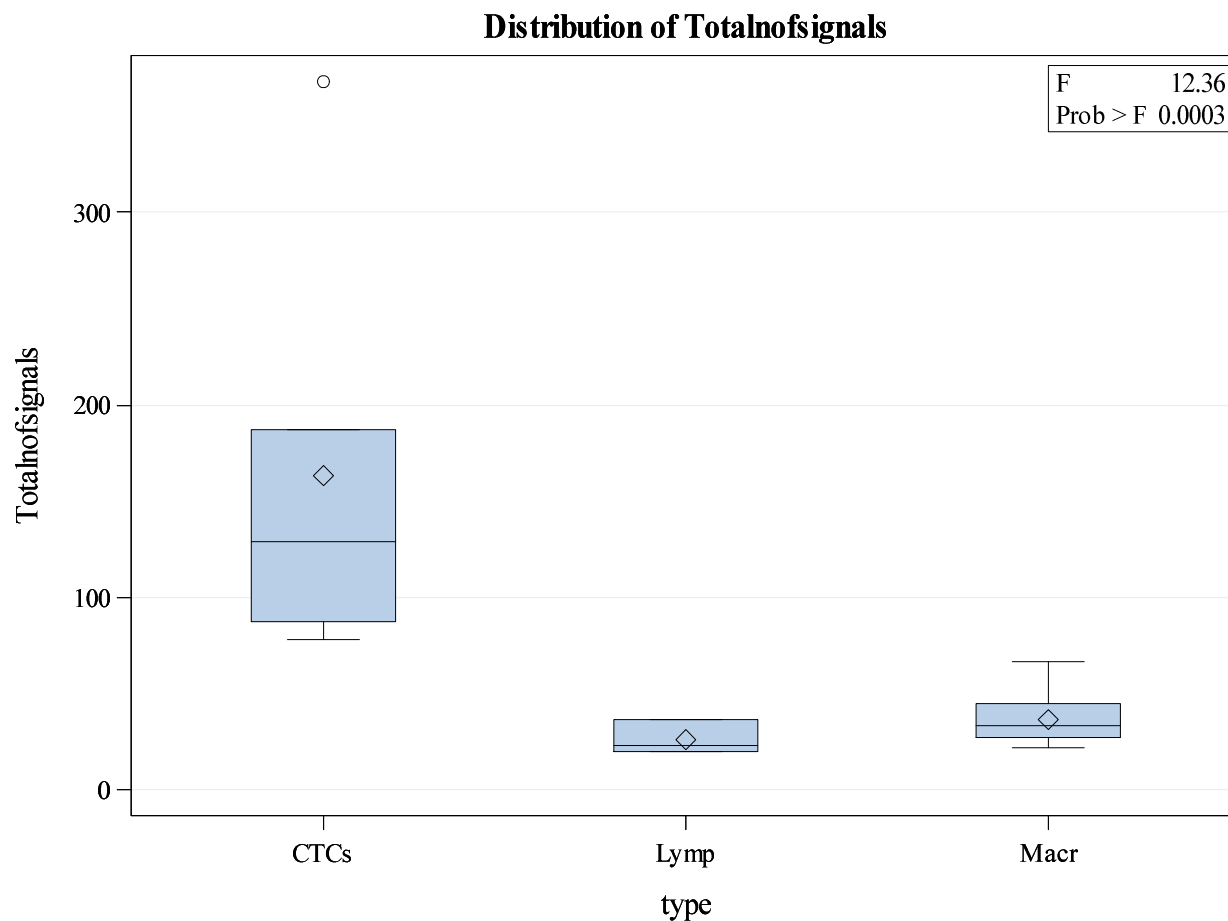



*The GLM Procedure***Dependent Variable: Totalnofaggregates Totalnofaggregates****pt=16AB0258**

| Source                 | DF | Sum of Squares | Mean Square | F Value | Pr > F |
|------------------------|----|----------------|-------------|---------|--------|
| <b>Model</b>           | 2  | 1748.458333    | 874.229167  | 11.84   | 0.0004 |
| <b>Error</b>           | 21 | 1550.166667    | 73.817460   |         |        |
| <b>Corrected Total</b> | 23 | 3298.625000    |             |         |        |

| R-Square | Coeff Var | Root MSE | Totalnofaggregates Mean |
|----------|-----------|----------|-------------------------|
| 0.530057 | 105.7441  | 8.591709 | 8.125000                |

| Source      | DF | Type III SS | Mean Square | F Value | Pr > F |
|-------------|----|-------------|-------------|---------|--------|
| <b>type</b> | 2  | 1748.458333 | 874.229167  | 11.84   | 0.0004 |

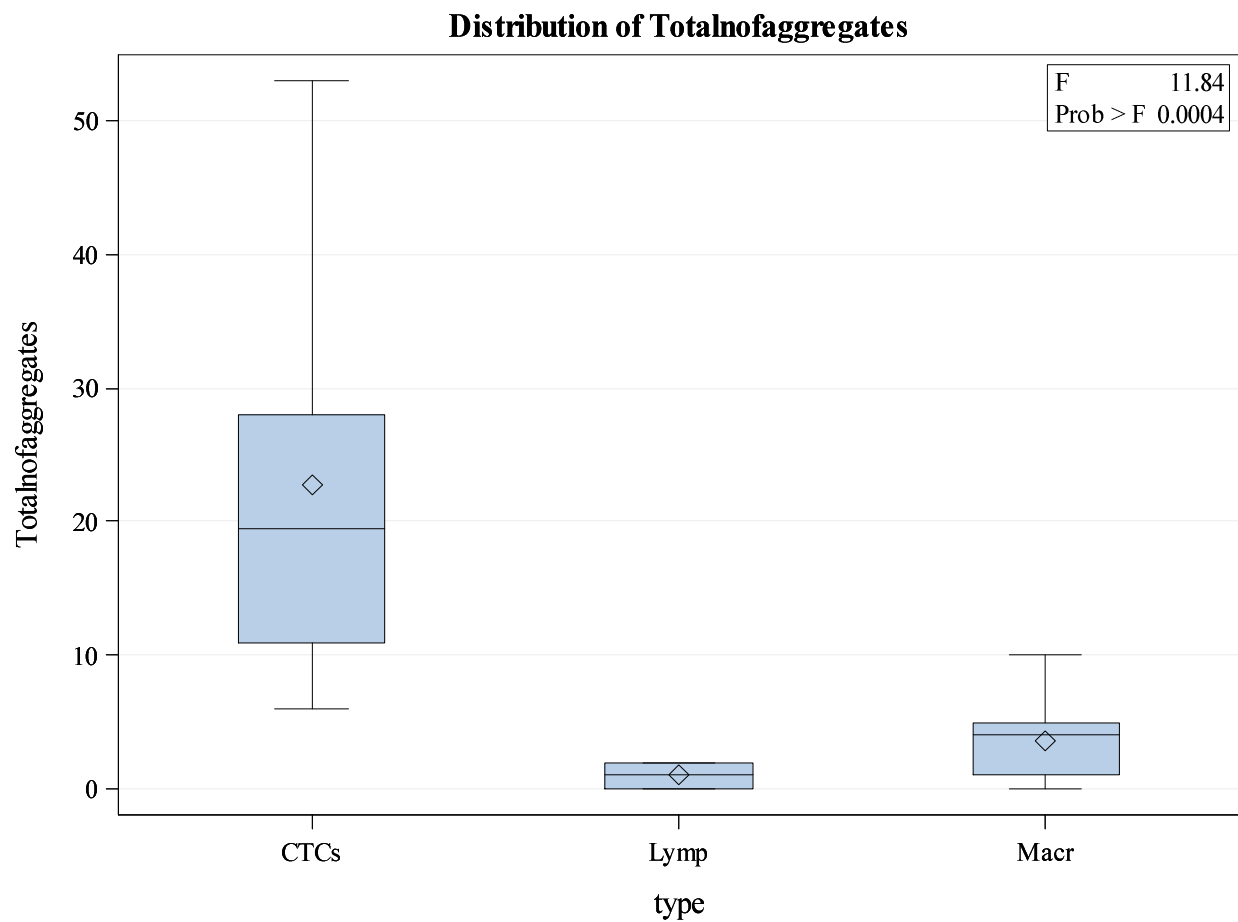

**The GLM Procedure**

**Dependent Variable: acratio**  
**acratio**

**pt=16AB0258**

| Source                 | DF | Sum of Squares | Mean Square | F Value | Pr > F |
|------------------------|----|----------------|-------------|---------|--------|
| <b>Model</b>           | 2  | 13.31176276    | 6.65588138  | 4.87    | 0.0182 |
| <b>Error</b>           | 21 | 28.67450926    | 1.36545282  |         |        |
| <b>Corrected Total</b> | 23 | 41.98627202    |             |         |        |

| R-Square | Coeff Var | Root MSE | acratio Mean |
|----------|-----------|----------|--------------|
| 0.317050 | 33.30396  | 1.168526 | 3.508669     |

| Source      | DF | Type III SS | Mean Square | F Value | Pr > F |
|-------------|----|-------------|-------------|---------|--------|
| <b>type</b> | 2  | 13.31176276 | 6.65588138  | 4.87    | 0.0182 |

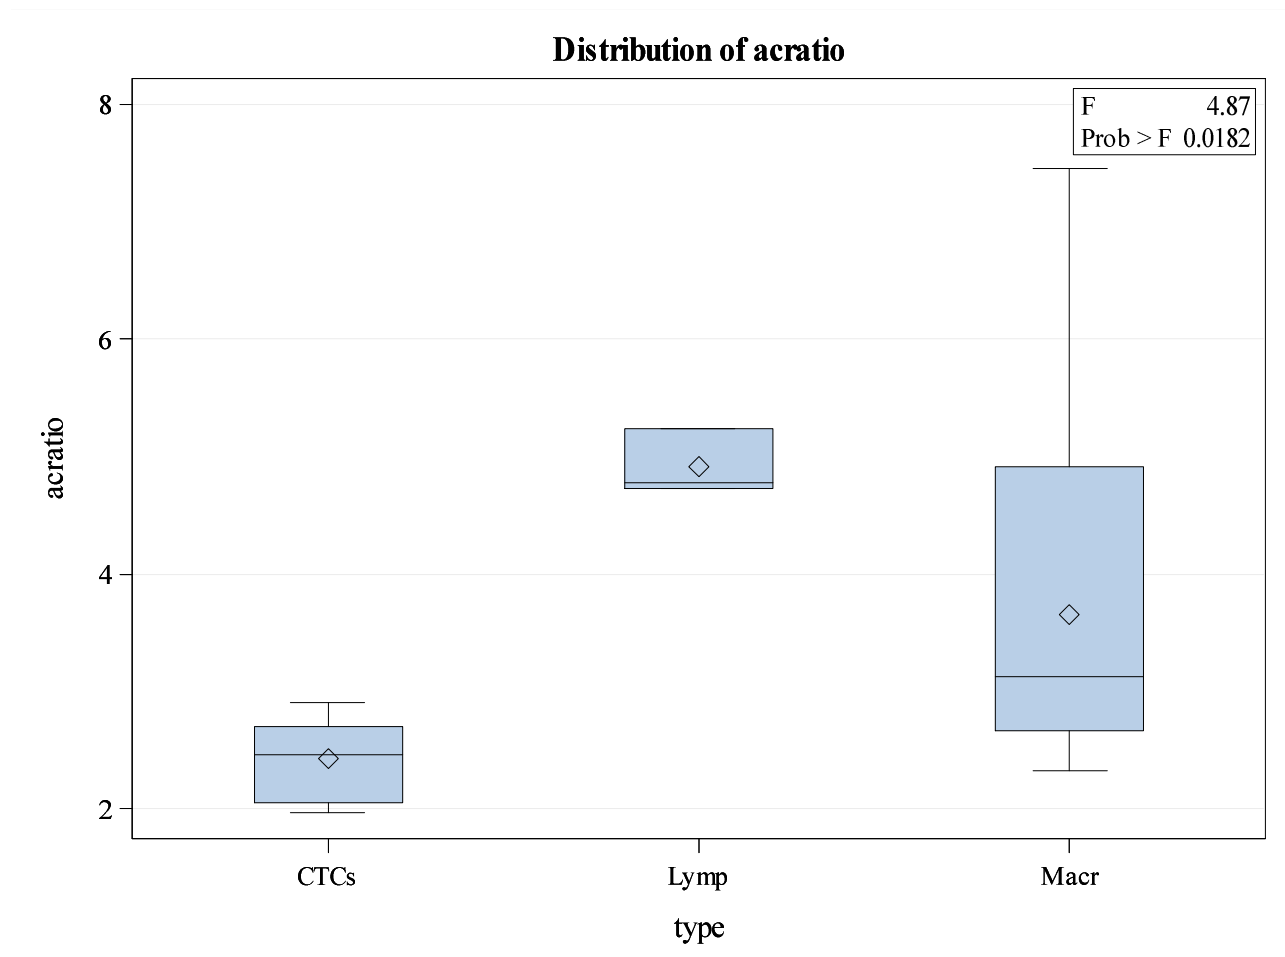

**The GLM Procedure**

**Dependent Variable: AvIntallsignals**  
**AvIntallsignals**

**pt=16AB0258**

| Source                 | DF | Sum of Squares | Mean Square | F Value | Pr > F |
|------------------------|----|----------------|-------------|---------|--------|
| <b>Model</b>           | 2  | 92405509.9     | 46202754.9  | 2.65    | 0.0939 |
| <b>Error</b>           | 21 | 365667191.1    | 17412723.4  |         |        |
| <b>Corrected Total</b> | 23 | 458072700.9    |             |         |        |

| R-Square | Coeff Var | Root MSE | AvIntallsignals Mean |
|----------|-----------|----------|----------------------|
| 0.201727 | 32.23082  | 4172.856 | 12946.78             |

| Source      | DF | Type III SS | Mean Square | F Value | Pr > F |
|-------------|----|-------------|-------------|---------|--------|
| <b>type</b> | 2  | 92405509.86 | 46202754.93 | 2.65    | 0.0939 |

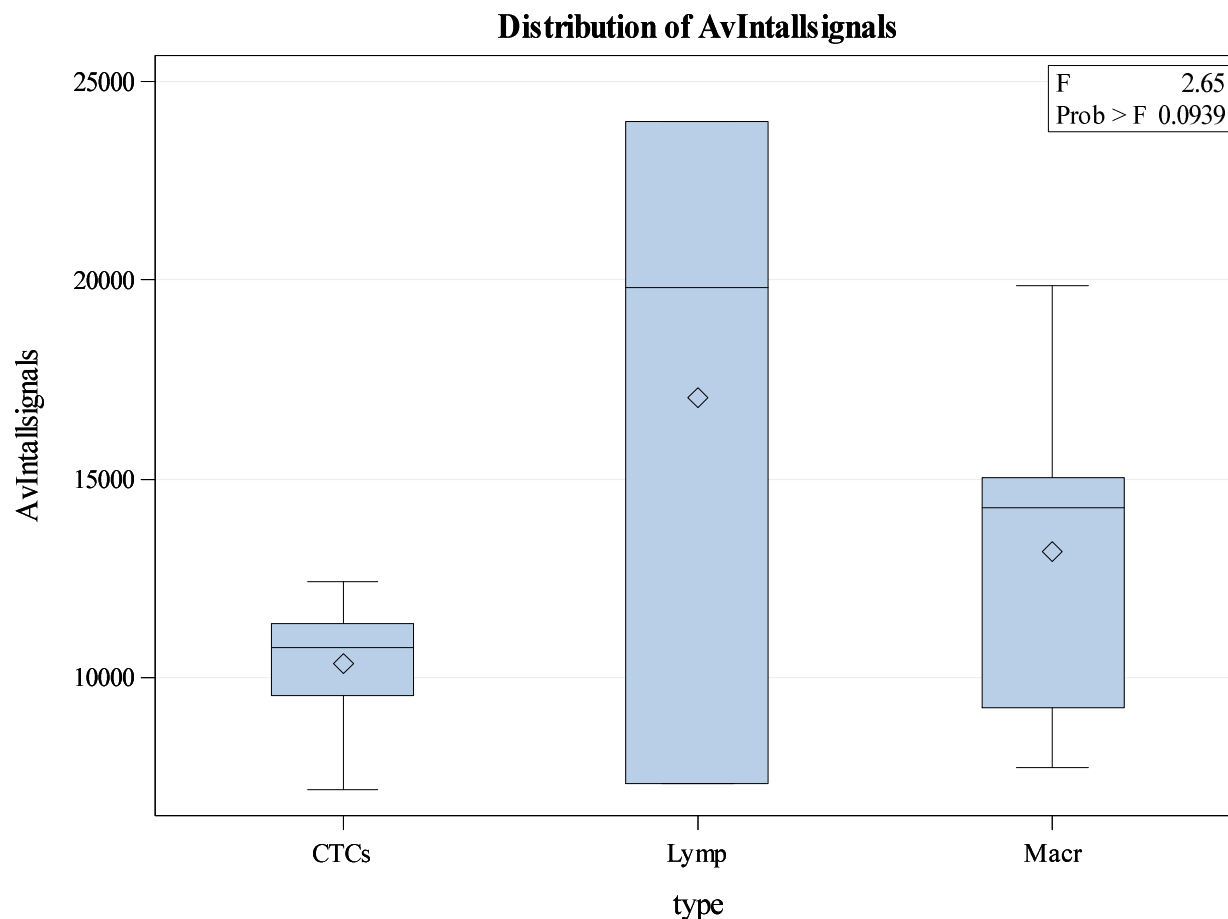

**The GLM Procedure**

**Dependent Variable: Totalintensity**  
**Totalintensity**

**pt=16AB0258**

| Source                 | DF | Sum of Squares | Mean Square  | F Value | Pr > F |
|------------------------|----|----------------|--------------|---------|--------|
| <b>Model</b>           | 2  | 5.58625E12     | 2.793125E12  | 16.79   | <.0001 |
| <b>Error</b>           | 21 | 3.4928964E12   | 166328401468 |         |        |
| <b>Corrected Total</b> | 23 | 9.0791464E12   |              |         |        |

| R-Square | Coeff Var | Root MSE | Totalintensity Mean |
|----------|-----------|----------|---------------------|
| 0.615284 | 55.25344  | 407833.8 | 738114.8            |

| Source      | DF | Type III SS | Mean Square | F Value | Pr > F |
|-------------|----|-------------|-------------|---------|--------|
| <b>type</b> | 2  | 5.58625E12  | 2.793125E12 | 16.79   | <.0001 |

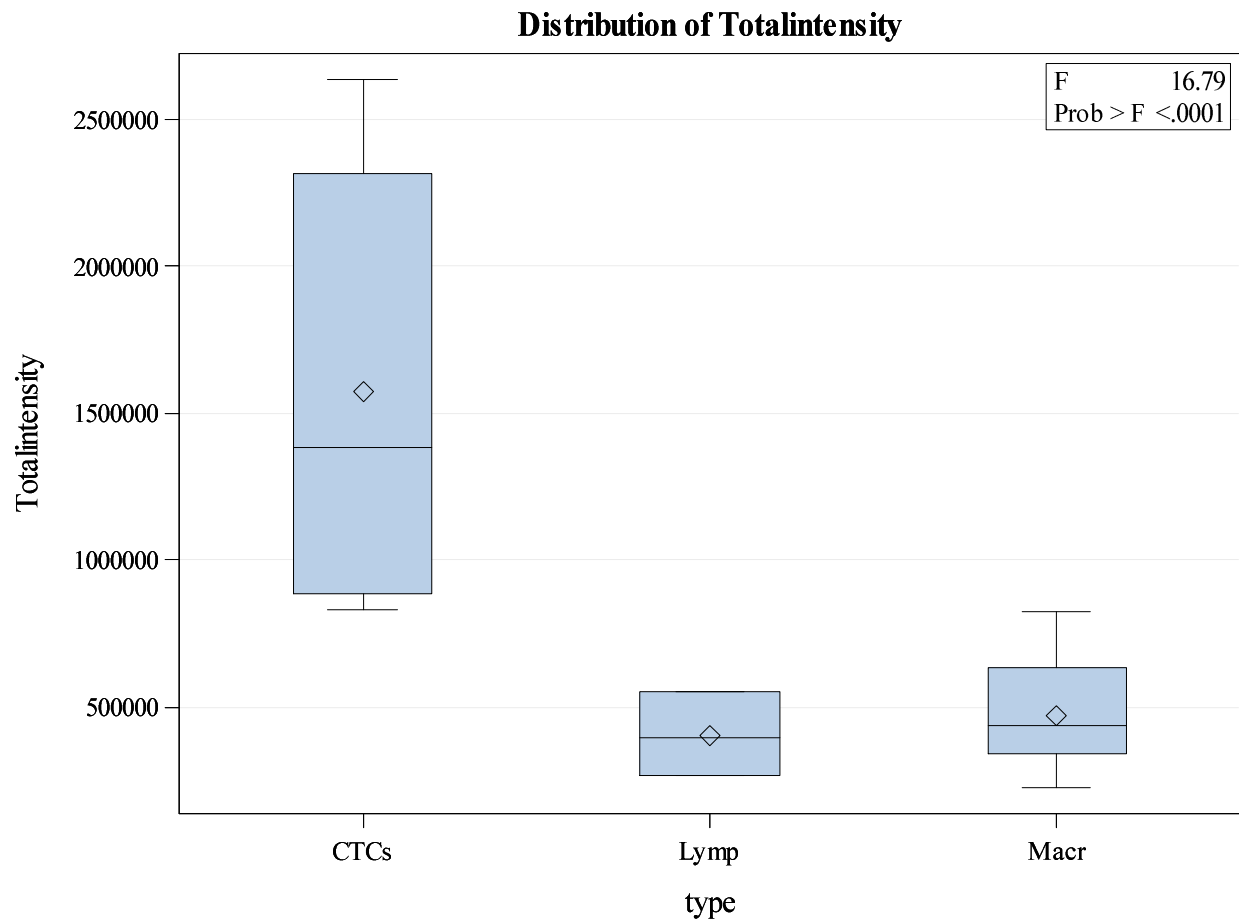

**The GLM Procedure**

**Dependent Variable: Nuclearvolume**  
**Nuclearvolume**

**pt=16AB0258**

| Source                 | DF | Sum of Squares | Mean Square  | F Value | Pr > F |
|------------------------|----|----------------|--------------|---------|--------|
| <b>Model</b>           | 2  | 1.4984471E12   | 749223558400 | 12.48   | 0.0003 |
| <b>Error</b>           | 21 | 1.2610145E12   | 60048311390  |         |        |
| <b>Corrected Total</b> | 23 | 2.7594617E12   |              |         |        |

| R-Square | Coeff Var | Root MSE | Nuclearvolume Mean |
|----------|-----------|----------|--------------------|
| 0.543022 | 39.74086  | 245047.6 | 616613.7           |

| Source      | DF | Type III SS  | Mean Square  | F Value | Pr > F |
|-------------|----|--------------|--------------|---------|--------|
| <b>type</b> | 2  | 1.4984471E12 | 749223558400 | 12.48   | 0.0003 |

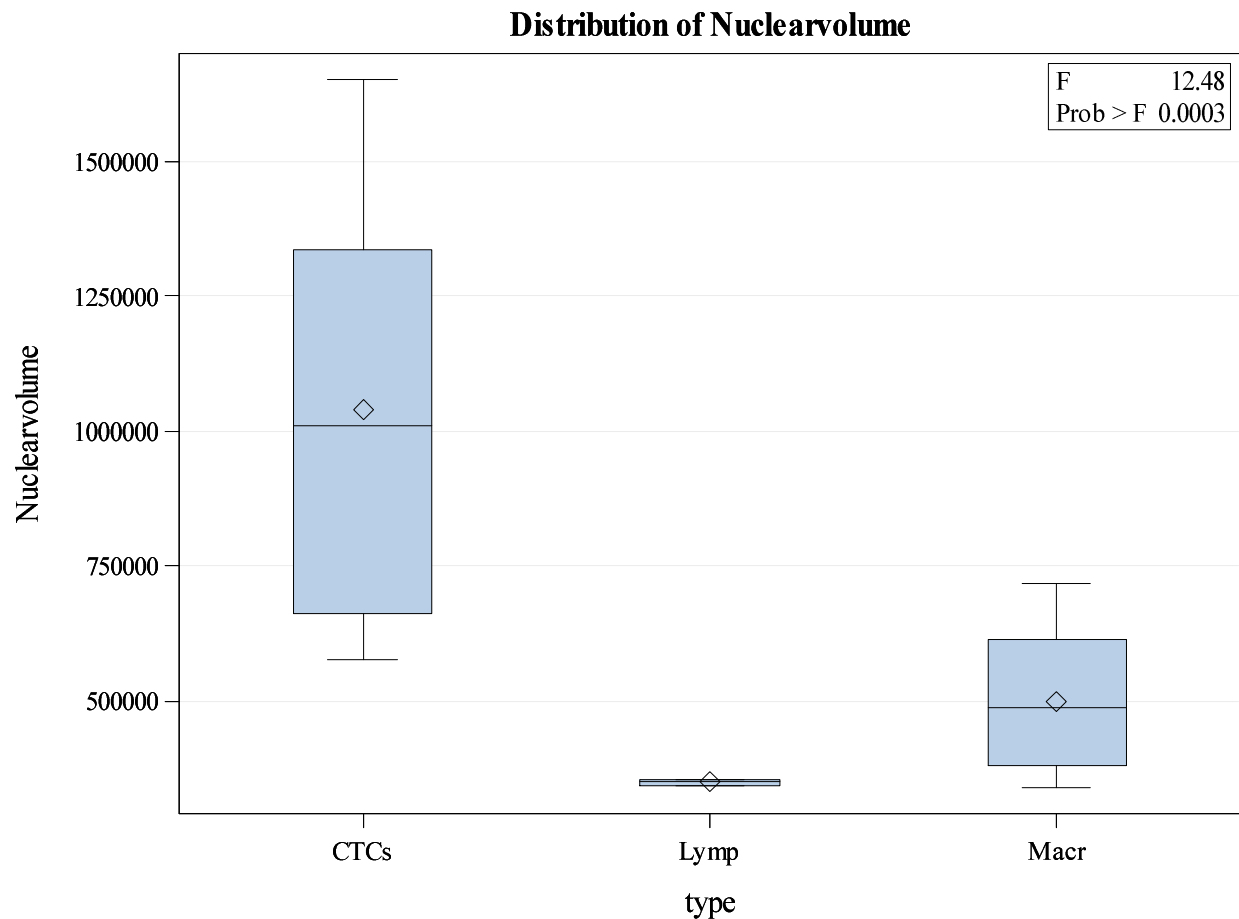

*The GLM Procedure**Dependent Variable: telomereperkvol*

pt=16AB0258

| Source                 | DF | Sum of Squares | Mean Square | F Value | Pr > F |
|------------------------|----|----------------|-------------|---------|--------|
| <b>Model</b>           | 2  | 0.02501614     | 0.01250807  | 21.02   | <.0001 |
| <b>Error</b>           | 21 | 0.01249744     | 0.00059512  |         |        |
| <b>Corrected Total</b> | 23 | 0.03751359     |             |         |        |

| R-Square | Coeff Var | Root MSE | telomereperkvol Mean |
|----------|-----------|----------|----------------------|
| 0.666856 | 26.35463  | 0.024395 | 0.092564             |

| Source      | DF | Type III SS | Mean Square | F Value | Pr > F |
|-------------|----|-------------|-------------|---------|--------|
| <b>type</b> | 2  | 0.02501614  | 0.01250807  | 21.02   | <.0001 |

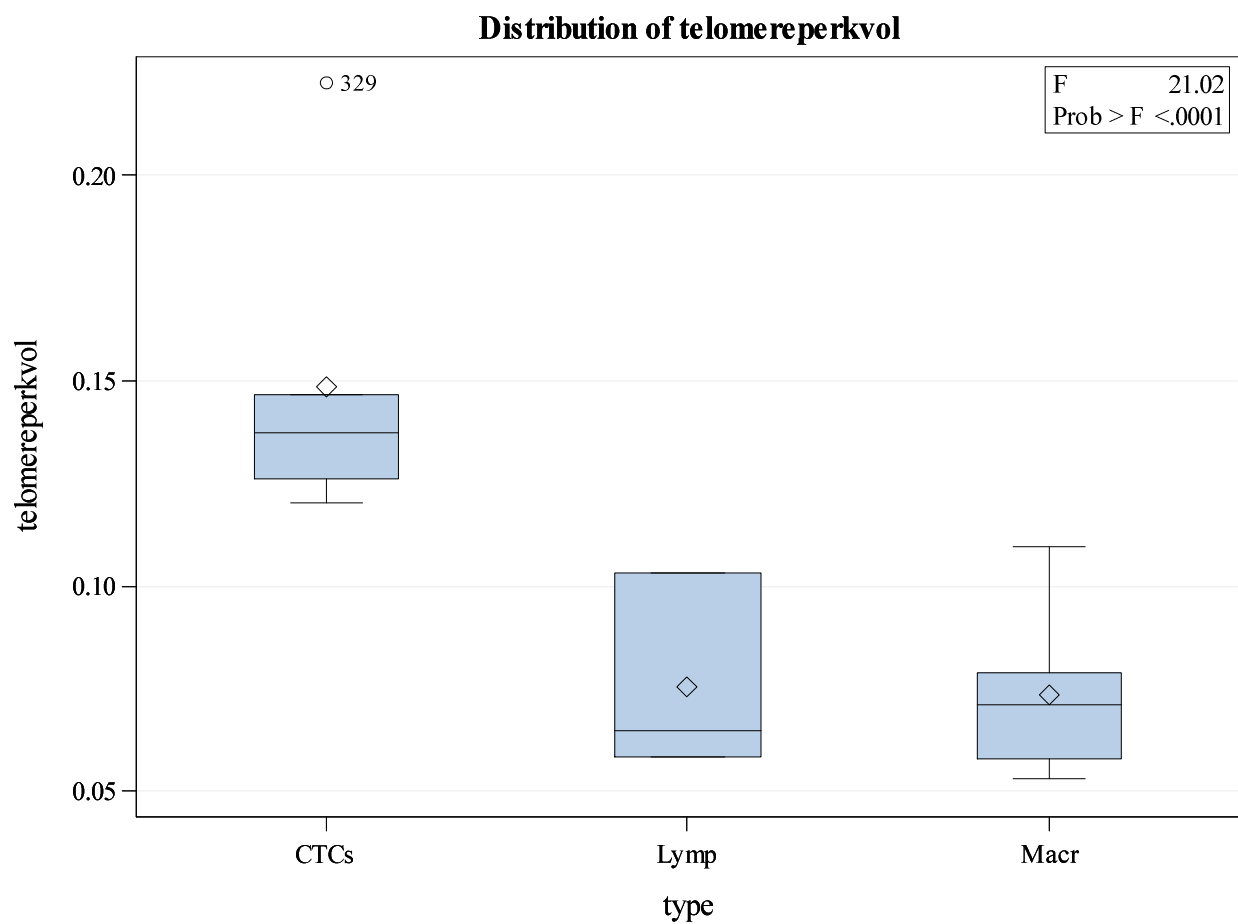

**The GLM Procedure**  
**Least Squares Means**

**pt=16AB0258**

| type        | Totalnofsignals<br>LSMEAN | Standard<br>Error | Pr >  t | LSMEAN<br>Number |
|-------------|---------------------------|-------------------|---------|------------------|
| <b>CTCs</b> | 162.833333                | 22.291224         | <.0001  | 1                |
| <b>Lymp</b> | 26.333333                 | 31.524552         | 0.4129  | 2                |
| <b>Macr</b> | 36.866667                 | 14.098208         | 0.0162  | 3                |

| Least Squares Means for effect type<br>Pr >  t  for H0: LSMean(i)=LSMean(j) |        |        |        |
|-----------------------------------------------------------------------------|--------|--------|--------|
| Dependent Variable: Totalnofsignals                                         |        |        |        |
| i/j                                                                         | 1      | 2      | 3      |
| 1                                                                           |        | 0.0020 | 0.0001 |
| 2                                                                           | 0.0020 |        | 0.7634 |
| 3                                                                           | 0.0001 | 0.7634 |        |

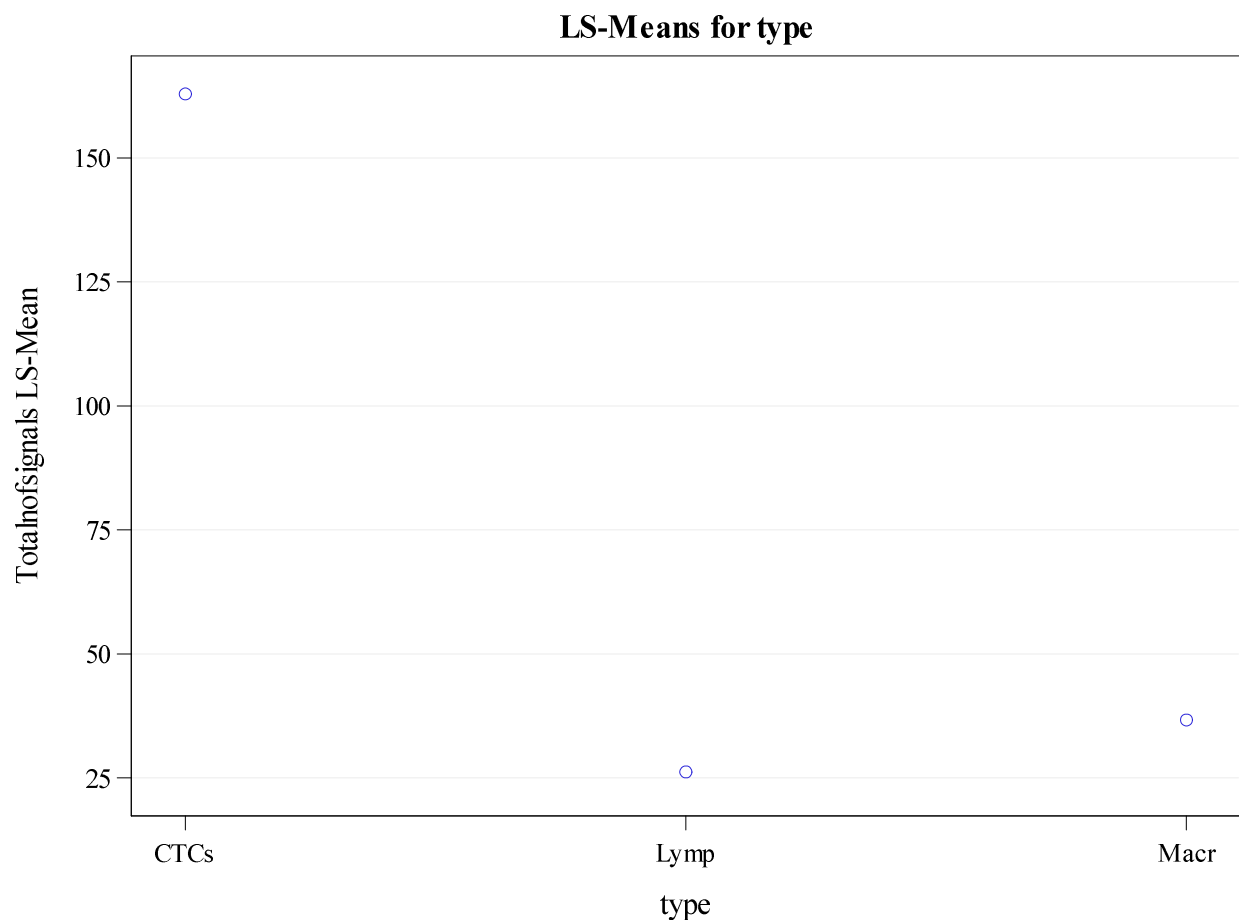

***The GLM Procedure***  
***Least Squares Means***

**pt=16AB0258**

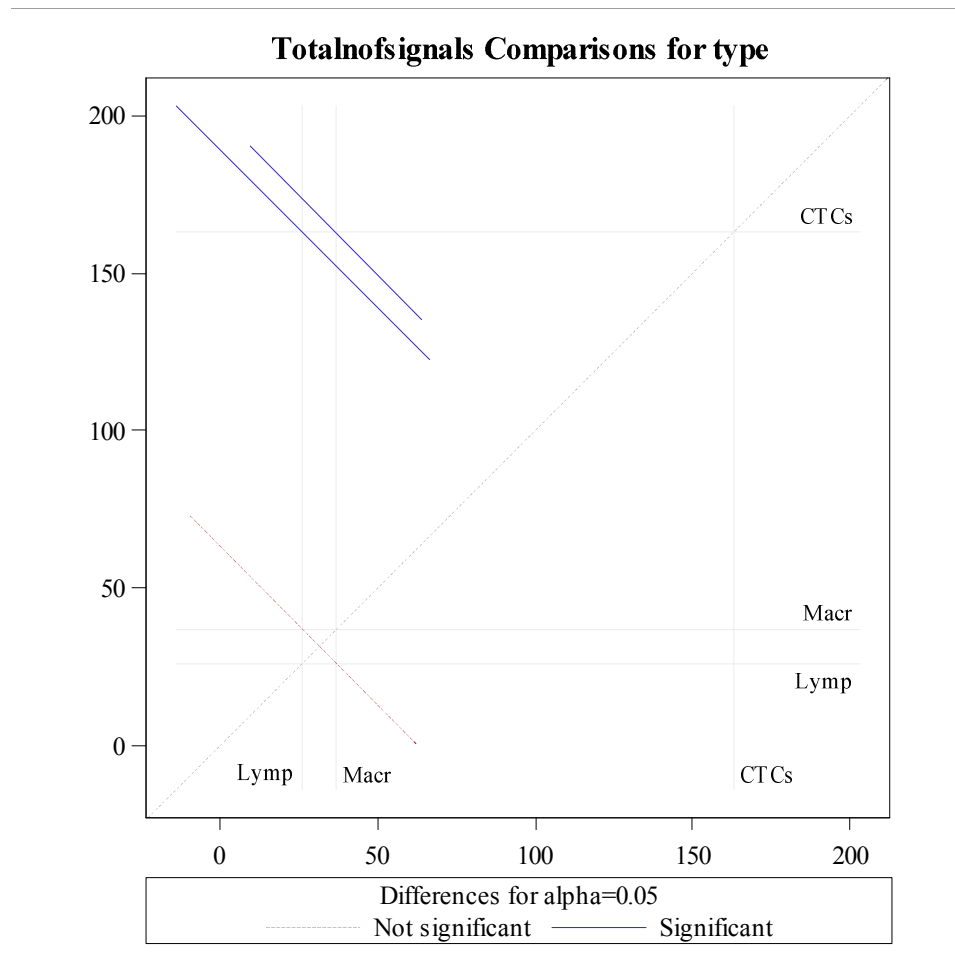

| type        | Totalnofaggregates<br>LSMEAN | Standard<br>Error | Pr >  t | LSMEAN<br>Number |
|-------------|------------------------------|-------------------|---------|------------------|
| <b>CTCs</b> | 22.8333333                   | 3.5075504         | <.0001  | 1                |
| <b>Lymp</b> | 1.0000000                    | 4.9604254         | 0.8422  | 2                |
| <b>Macr</b> | 3.6666667                    | 2.2183697         | 0.1132  | 3                |



***The GLM Procedure***  
***Least Squares Means***

**pt=16AB0258**

| Least Squares Means for effect type<br>Pr >  t  for H0: LSMean(i)=LSMean(j) |        |        |        |
|-----------------------------------------------------------------------------|--------|--------|--------|
| Dependent Variable: Totalnofaggregates                                      |        |        |        |
| i/j                                                                         | 1      | 2      | 3      |
| 1                                                                           |        | 0.0017 | 0.0001 |
| 2                                                                           | 0.0017 |        | 0.6287 |
| 3                                                                           | 0.0001 | 0.6287 |        |

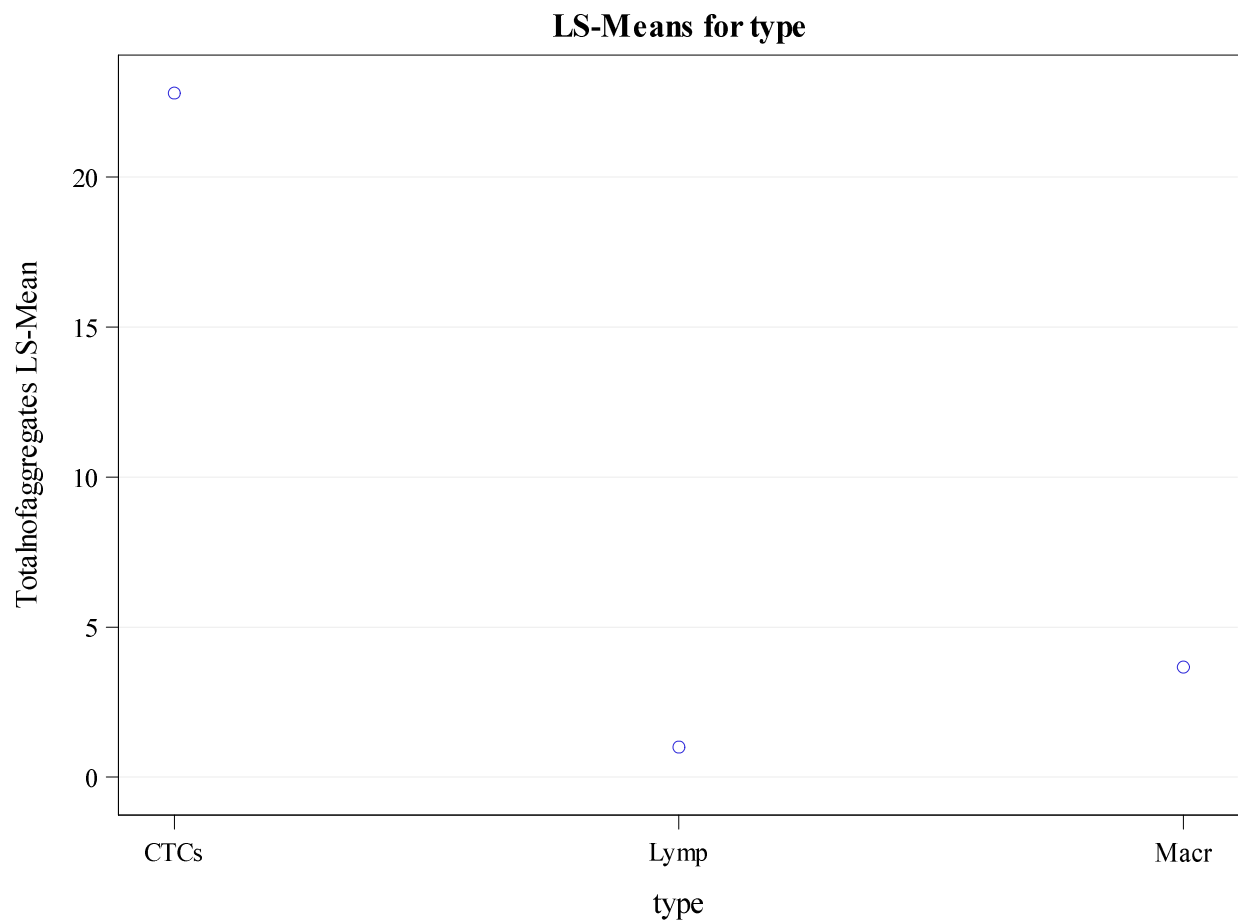

***The GLM Procedure***  
***Least Squares Means***

**pt=16AB0258**

**Totalnofaggregates Comparisons for type**

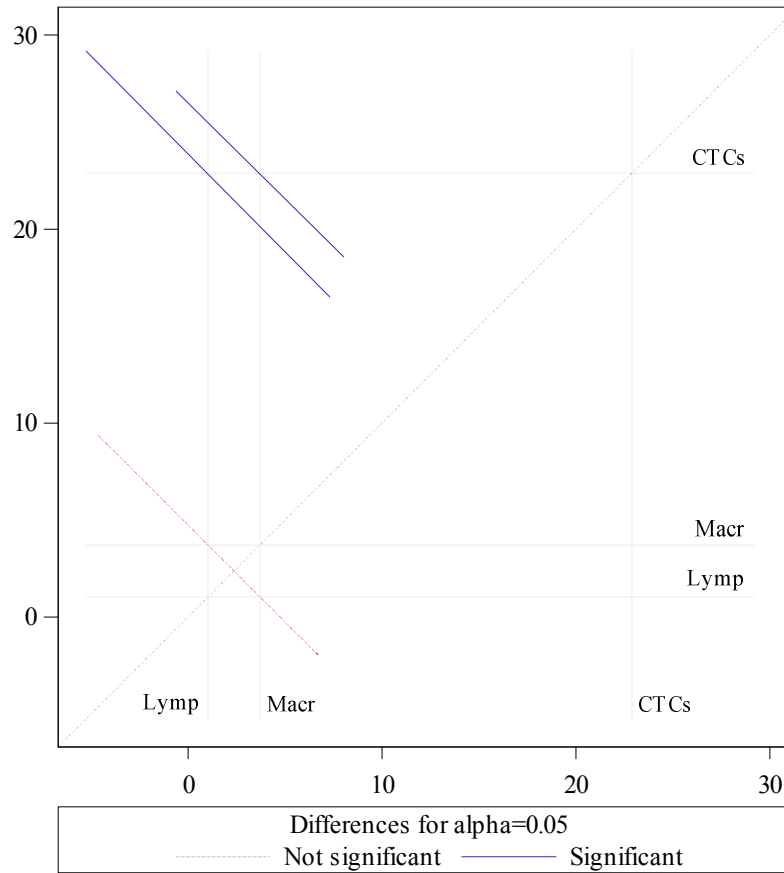

| type        | acratio<br>LSMEAN | Standard<br>Error | Pr >  t | LSMEAN<br>Number |
|-------------|-------------------|-------------------|---------|------------------|
| <b>CTCs</b> | 2.42781634        | 0.47704871        | <.0001  | 1                |
| <b>Lymp</b> | 4.91853264        | 0.67464875        | <.0001  | 2                |
| <b>Macr</b> | 3.65903776        | 0.30171209        | <.0001  | 3                |

| Least Squares Means for effect type<br>Pr >  t  for H0: LSMean(i)=LSMean(j) |        |        |        |
|-----------------------------------------------------------------------------|--------|--------|--------|
| Dependent Variable: acratio                                                 |        |        |        |
| i/j                                                                         | 1      | 2      | 3      |
| 1                                                                           |        | 0.0066 | 0.0407 |
| 2                                                                           | 0.0066 |        | 0.1031 |
| 3                                                                           | 0.0407 | 0.1031 |        |

*The GLM Procedure*  
*Least Squares Means*

pt=16AB0258

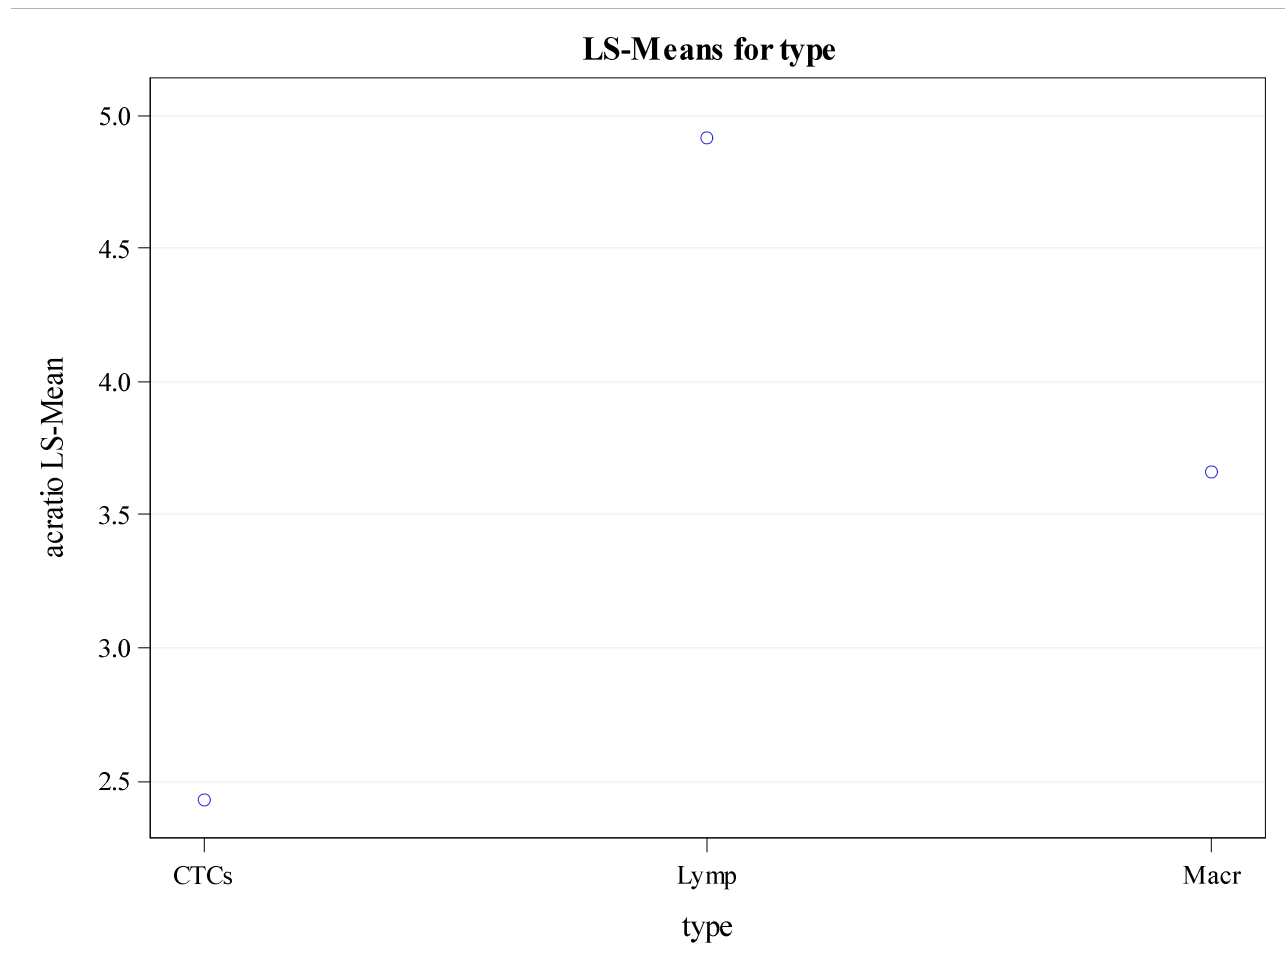

***The GLM Procedure***  
***Least Squares Means***

**pt=16AB0258**

**acratio Comparisons for type**

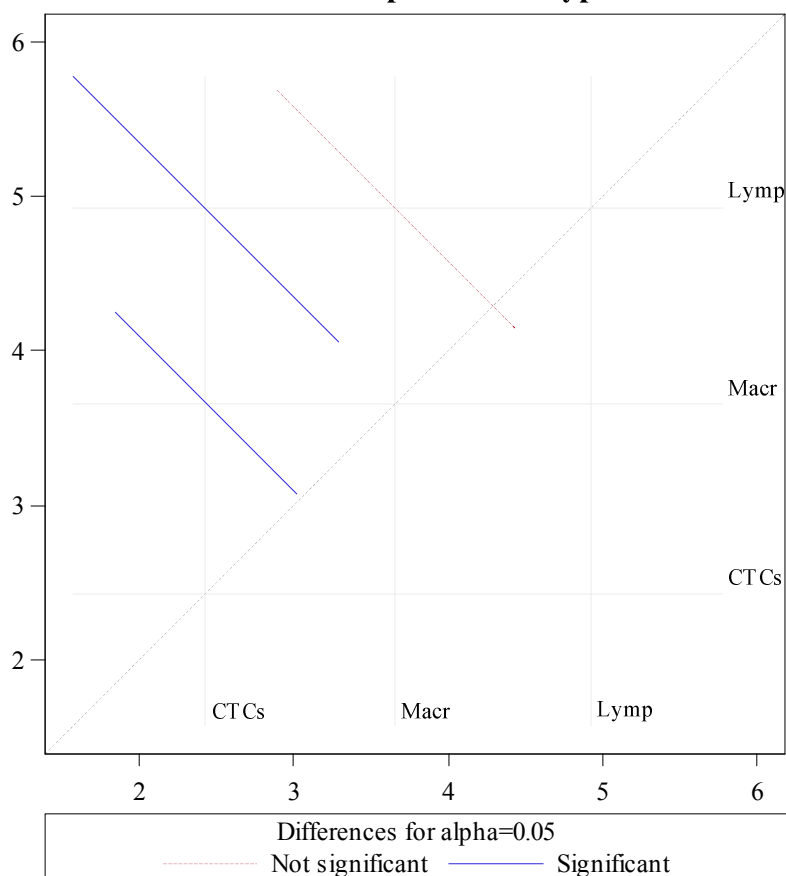

| type        | AvIntallsignals<br>LSMEAN | Standard<br>Error | Pr >  t | LSMEAN<br>Number |
|-------------|---------------------------|-------------------|---------|------------------|
| <b>CTCs</b> | 10320.8782                | 1703.5611         | <.0001  | 1                |
| <b>Lymp</b> | 17038.4698                | 2409.1993         | <.0001  | 2                |
| <b>Macr</b> | 13178.8105                | 1077.4267         | <.0001  | 3                |

| Least Squares Means for effect type<br>Pr >  t  for H0: LSMean(i)=LSMean(j) |        |        |        |
|-----------------------------------------------------------------------------|--------|--------|--------|
| Dependent Variable: AvIntallsignals                                         |        |        |        |
| i/j                                                                         | 1      | 2      | 3      |
| 1                                                                           |        | 0.0334 | 0.1709 |
| 2                                                                           | 0.0334 |        | 0.1584 |
| 3                                                                           | 0.1709 | 0.1584 |        |

*The GLM Procedure*  
*Least Squares Means*

pt=16AB0258

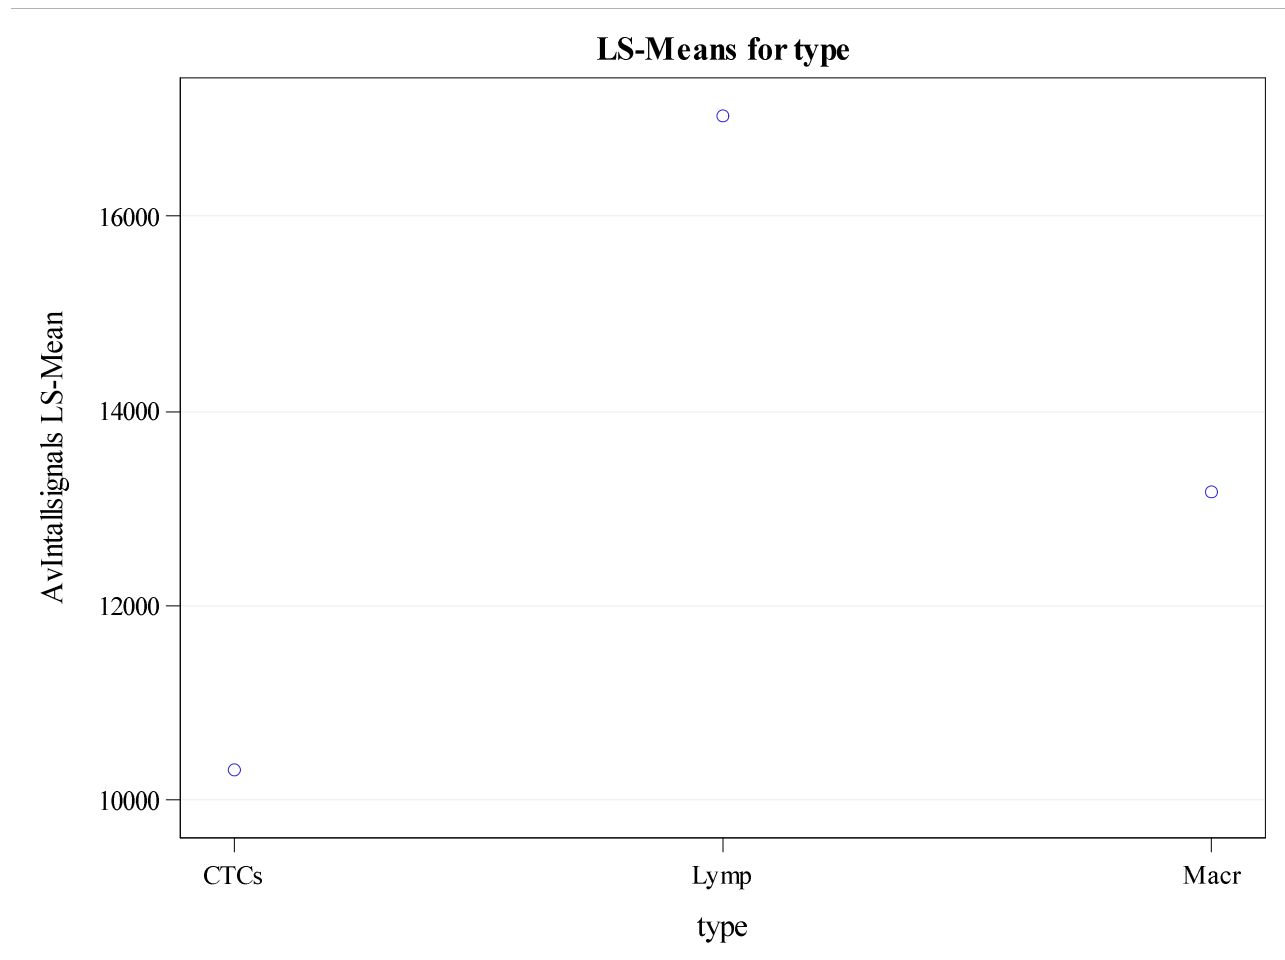

***The GLM Procedure***  
***Least Squares Means***

**pt=16AB0258**

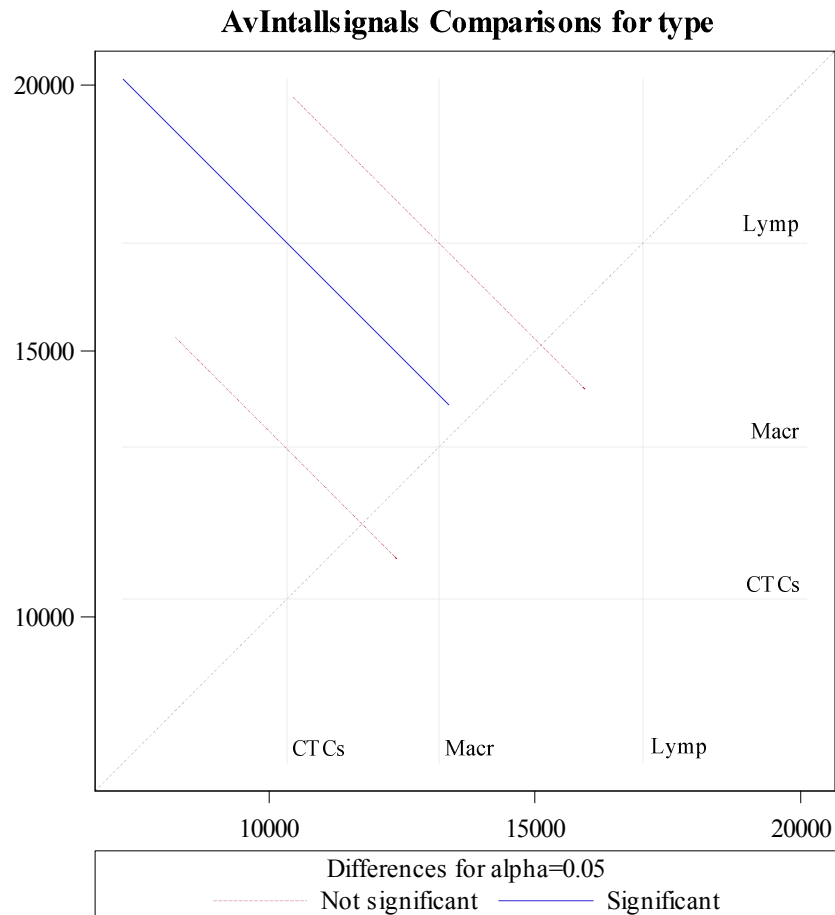

| type        | Totalintensity<br>LSMEAN | Standard<br>Error | Pr >  t | LSMEAN<br>Number |
|-------------|--------------------------|-------------------|---------|------------------|
| <b>CTCs</b> | 1572904.33               | 166497.45         | <.0001  | 1                |
| <b>Lymp</b> | 403921.67                | 235462.95         | 0.1010  | 2                |
| <b>Macr</b> | 471037.60                | 105302.23         | 0.0002  | 3                |

| Least Squares Means for effect type<br>Pr >  t  for H0: LSMean(i)=LSMean(j) |        |        |        |
|-----------------------------------------------------------------------------|--------|--------|--------|
| Dependent Variable: Totalintensity                                          |        |        |        |
| i/j                                                                         | 1      | 2      | 3      |
| 1                                                                           |        | 0.0006 | <.0001 |
| 2                                                                           | 0.0006 |        | 0.7972 |
| 3                                                                           | <.0001 | 0.7972 |        |

*The GLM Procedure*  
*Least Squares Means*

pt=16AB0258

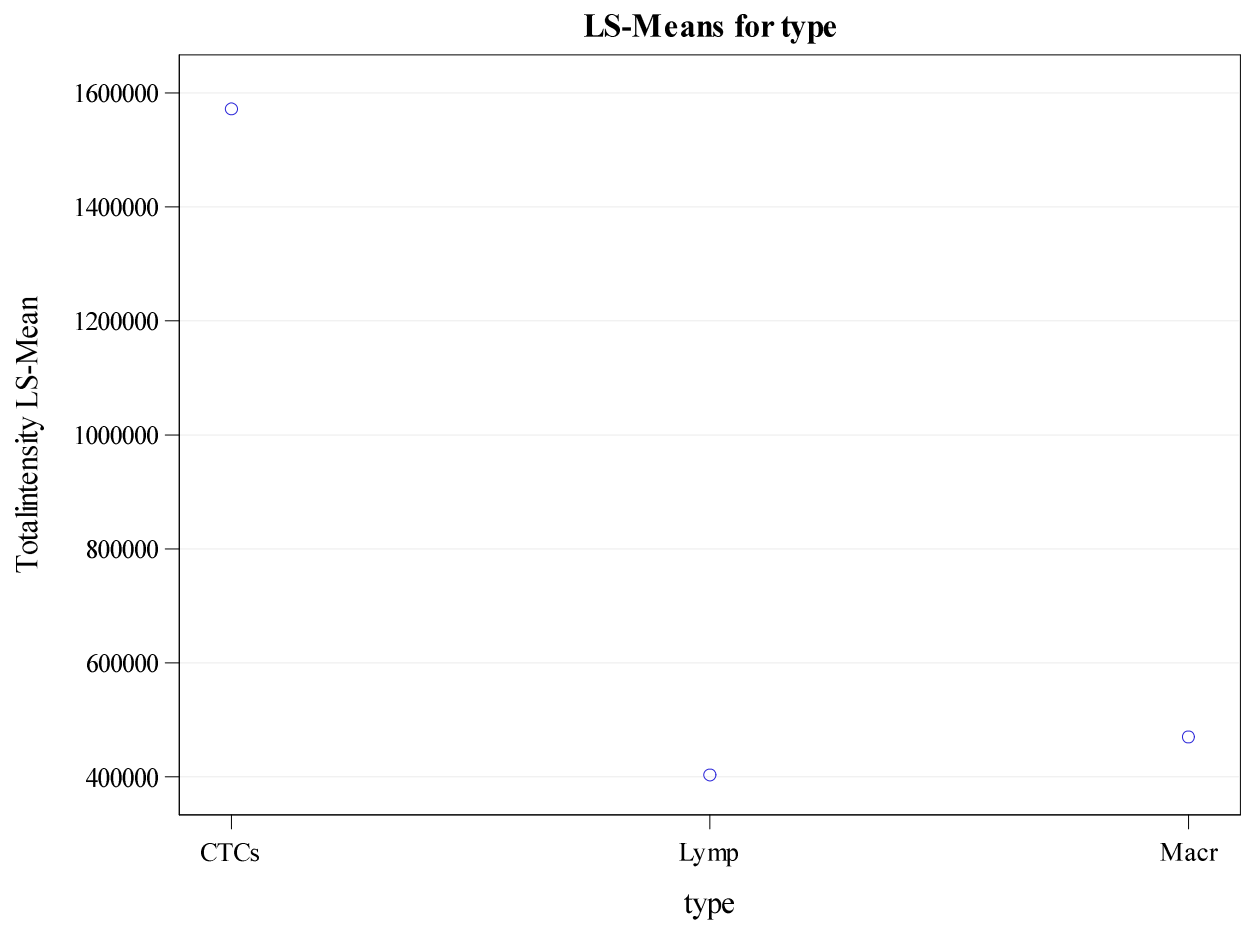

**The GLM Procedure**  
**Least Squares Means**

**pt=16AB0258**

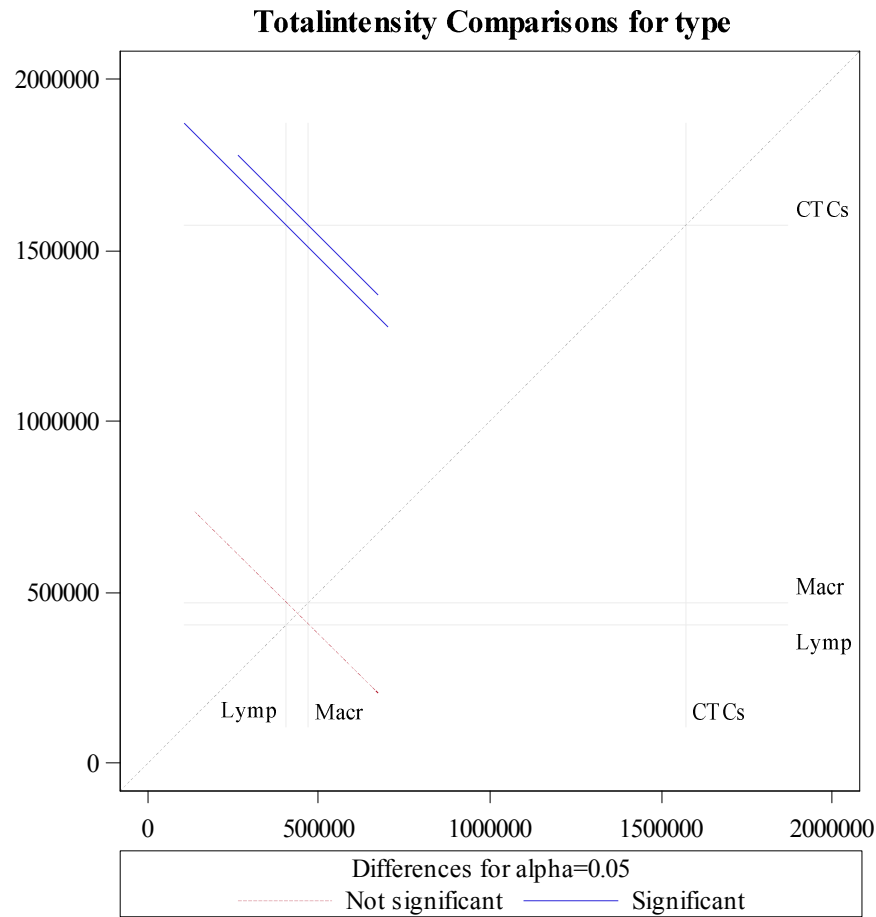

| type        | Nuclearvolume<br>LSMEAN | Standard<br>Error | Pr >  t | LSMEAN<br>Number |
|-------------|-------------------------|-------------------|---------|------------------|
| <b>CTCs</b> | 1041021.83              | 100040.25         | <.0001  | 1                |
| <b>Lymp</b> | 348797.33               | 141478.28         | 0.0224  | 2                |
| <b>Macr</b> | 500413.67               | 63271.01          | <.0001  | 3                |

| Least Squares Means for effect type<br>Pr >  t  for H0: LSMean(i)=LSMean(j) |        |        |        |
|-----------------------------------------------------------------------------|--------|--------|--------|
| Dependent Variable: Nuclearvolume                                           |        |        |        |
| i/j                                                                         | 1      | 2      | 3      |
| 1                                                                           |        | 0.0007 | 0.0002 |
| 2                                                                           | 0.0007 |        | 0.3391 |
| 3                                                                           | 0.0002 | 0.3391 |        |



*The GLM Procedure*  
*Least Squares Means*

pt=16AB0258

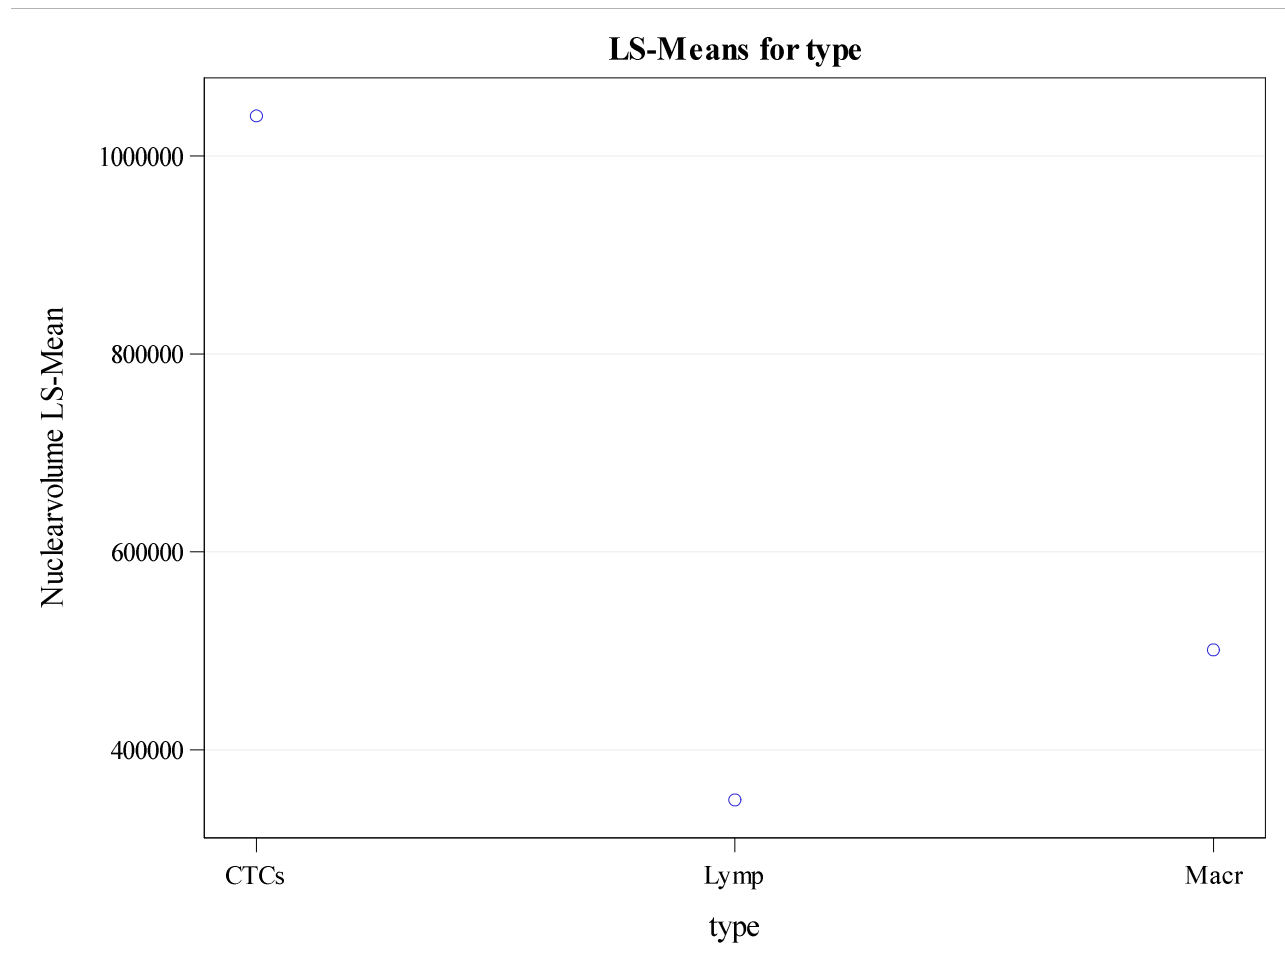

**The GLM Procedure**  
**Least Squares Means**

**pt=16AB0258**

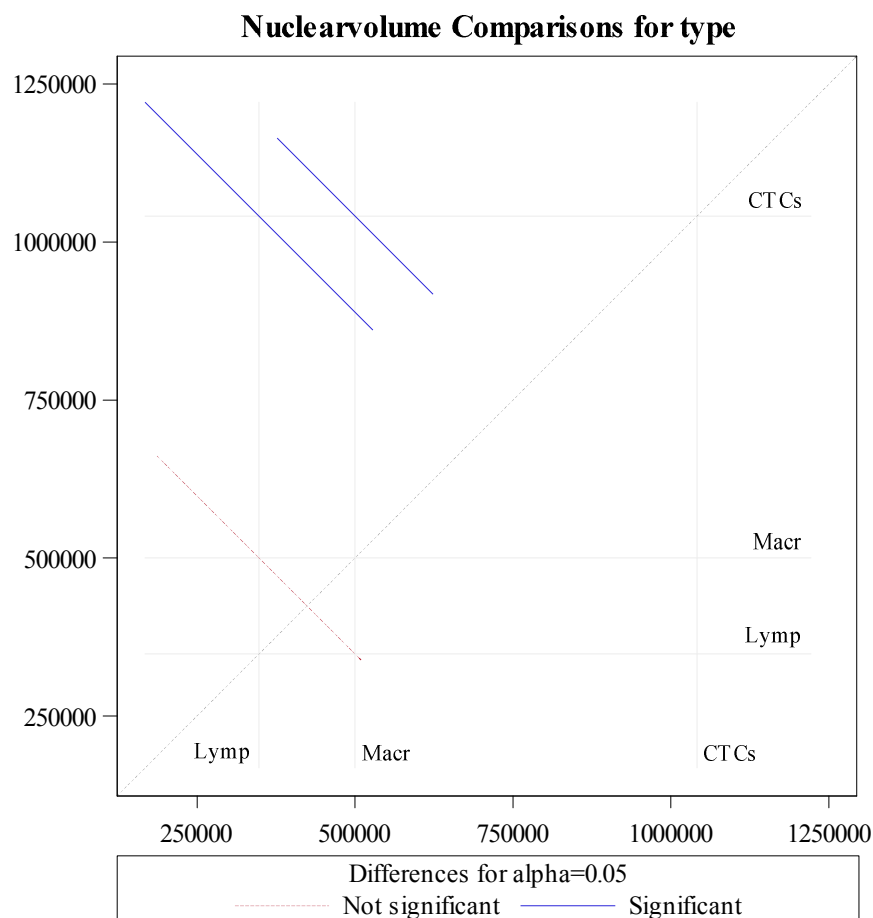

| type        | telomereperkvol<br>LSMEAN | Standard<br>Error | Pr >  t | LSMEAN<br>Number |
|-------------|---------------------------|-------------------|---------|------------------|
| <b>CTCs</b> | 0.14847493                | 0.00995922        | <.0001  | 1                |
| <b>Lymp</b> | 0.07544235                | 0.01408446        | <.0001  | 2                |
| <b>Macr</b> | 0.07362463                | 0.00629876        | <.0001  | 3                |

| Least Squares Means for effect type<br>Pr >  t  for H0: LSMean(i)=LSMean(j) |        |        |        |
|-----------------------------------------------------------------------------|--------|--------|--------|
| Dependent Variable: telomereperkvol                                         |        |        |        |
| i/j                                                                         | 1      | 2      | 3      |
| 1                                                                           |        | 0.0004 | <.0001 |
| 2                                                                           | 0.0004 |        | 0.9073 |
| 3                                                                           | <.0001 | 0.9073 |        |

*The GLM Procedure*  
*Least Squares Means*

pt=16AB0258

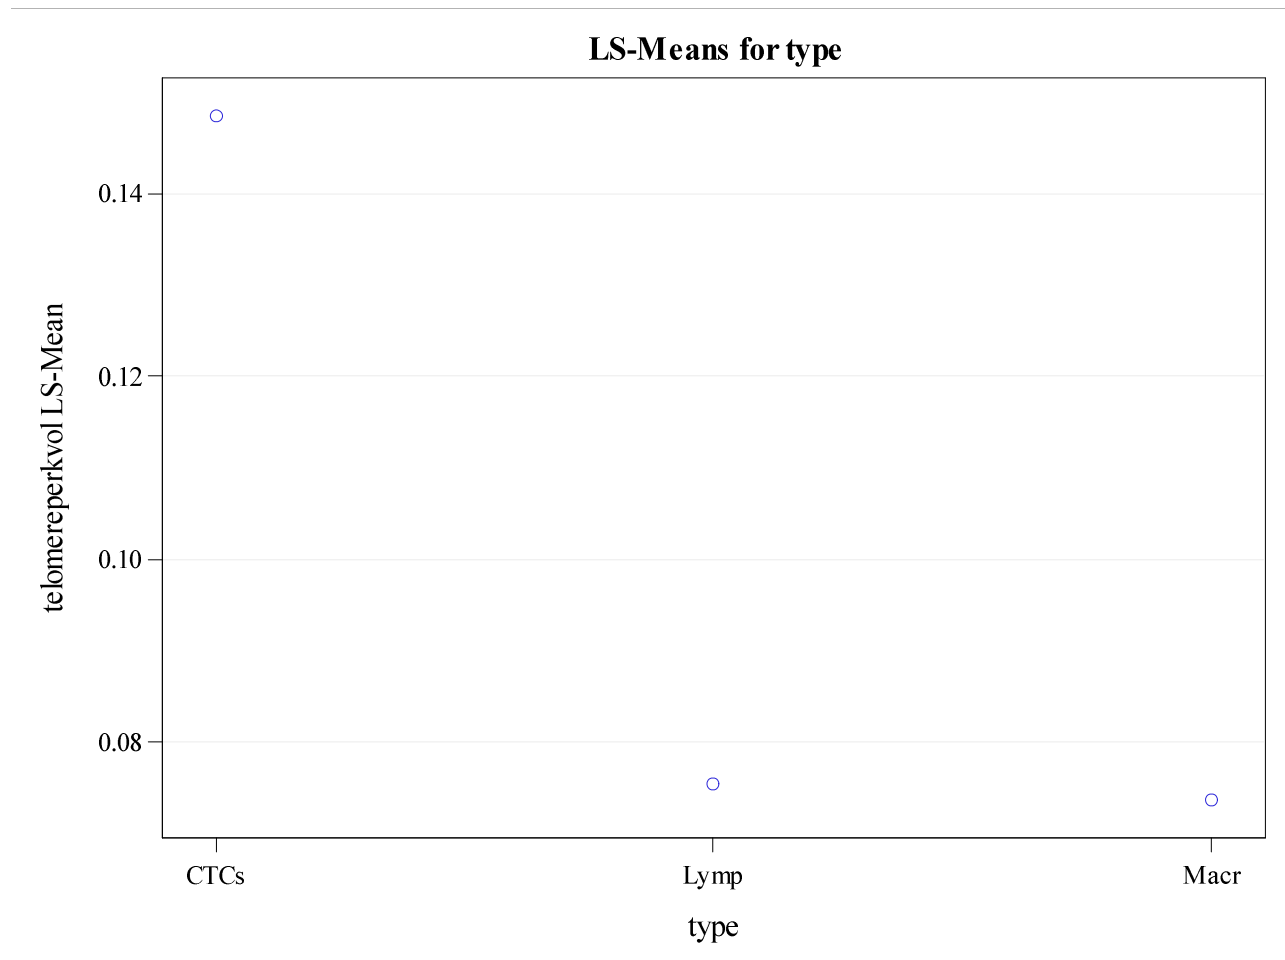

*The GLM Procedure*  
*Least Squares Means*

pt=16AB0258

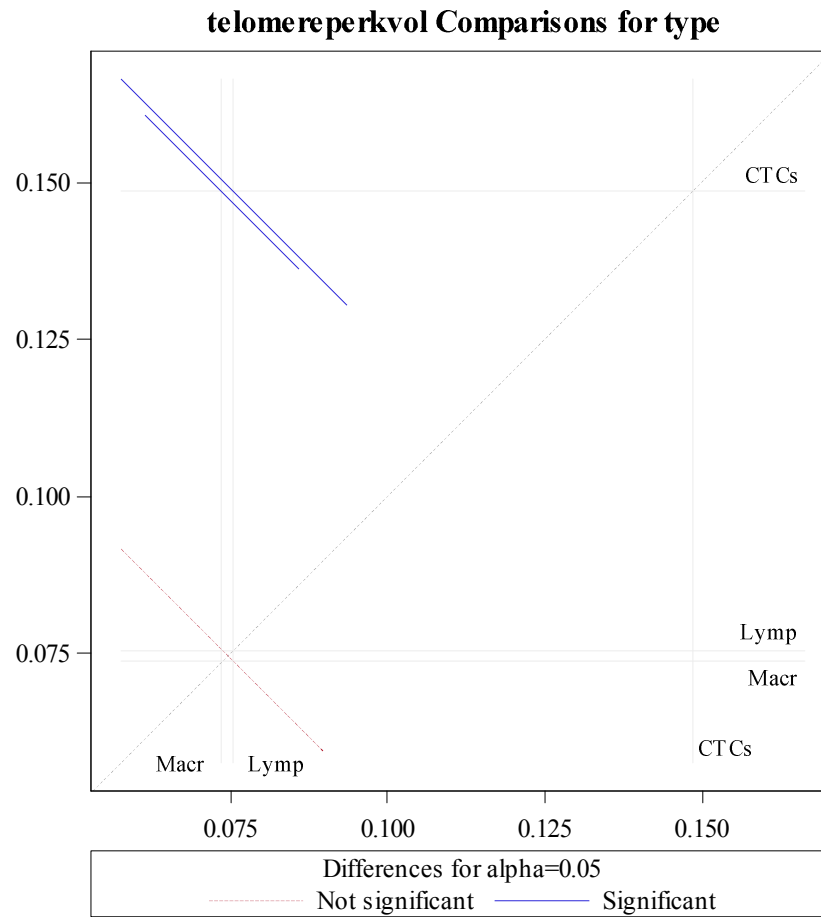

**Note:** To ensure overall protection level, only probabilities associated with pre-planned comparisons should be used.

*The GLM Procedure***pt=16AB0304**

| Class Level Information |        |                 |
|-------------------------|--------|-----------------|
| Class                   | Levels | Values          |
| <b>type</b>             | 3      | CTCs Lymph Macr |

|                                    |    |
|------------------------------------|----|
| <b>Number of Observations Read</b> | 66 |
| <b>Number of Observations Used</b> | 66 |

**The GLM Procedure**

**Dependent Variable: Totalnofsignals**  
**Totalnofsignals**

**pt=16AB0304**

| Source                 | DF | Sum of Squares | Mean Square | F Value | Pr > F |
|------------------------|----|----------------|-------------|---------|--------|
| <b>Model</b>           | 2  | 75334.7212     | 37667.3606  | 24.67   | <.0001 |
| <b>Error</b>           | 63 | 96186.8091     | 1526.7747   |         |        |
| <b>Corrected Total</b> | 65 | 171521.5303    |             |         |        |

| R-Square | Coeff Var | Root MSE | Totalnofsignals Mean |
|----------|-----------|----------|----------------------|
| 0.439214 | 53.80517  | 39.07397 | 72.62121             |

| Source      | DF | Type III SS | Mean Square | F Value | Pr > F |
|-------------|----|-------------|-------------|---------|--------|
| <b>type</b> | 2  | 75334.72125 | 37667.36062 | 24.67   | <.0001 |

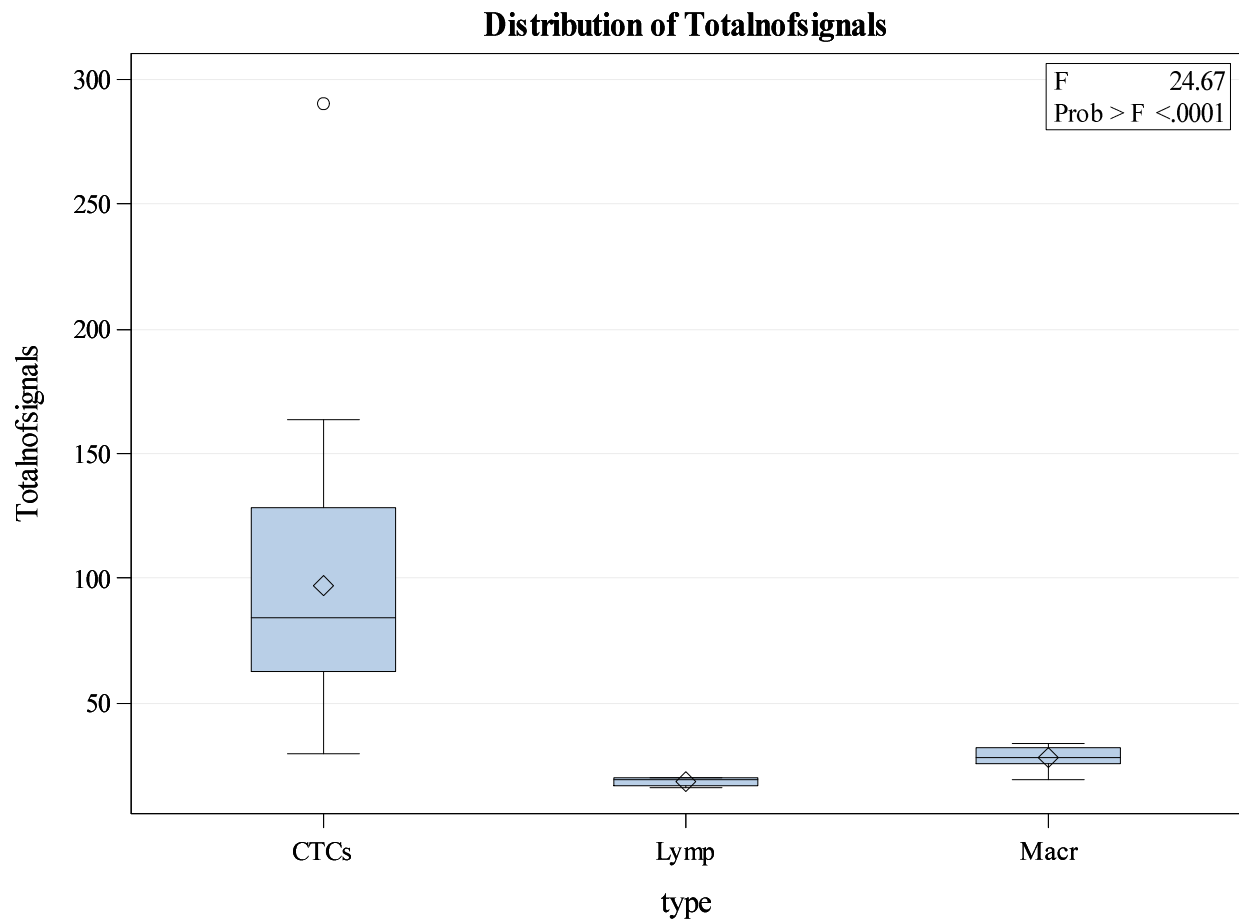

**The GLM Procedure****Dependent Variable: Totalnofaggregates Totalnofaggregates****pt=16AB0304**

| Source                 | DF | Sum of Squares | Mean Square | F Value | Pr > F |
|------------------------|----|----------------|-------------|---------|--------|
| <b>Model</b>           | 2  | 1218.768091    | 609.384045  | 12.04   | <.0001 |
| <b>Error</b>           | 63 | 3189.853121    | 50.632589   |         |        |
| <b>Corrected Total</b> | 65 | 4408.621212    |             |         |        |

| R-Square | Coeff Var | Root MSE | Totalnofaggregates Mean |
|----------|-----------|----------|-------------------------|
| 0.276451 | 88.11134  | 7.115658 | 8.075758                |

| Source      | DF | Type III SS | Mean Square | F Value | Pr > F |
|-------------|----|-------------|-------------|---------|--------|
| <b>type</b> | 2  | 1218.768091 | 609.384045  | 12.04   | <.0001 |

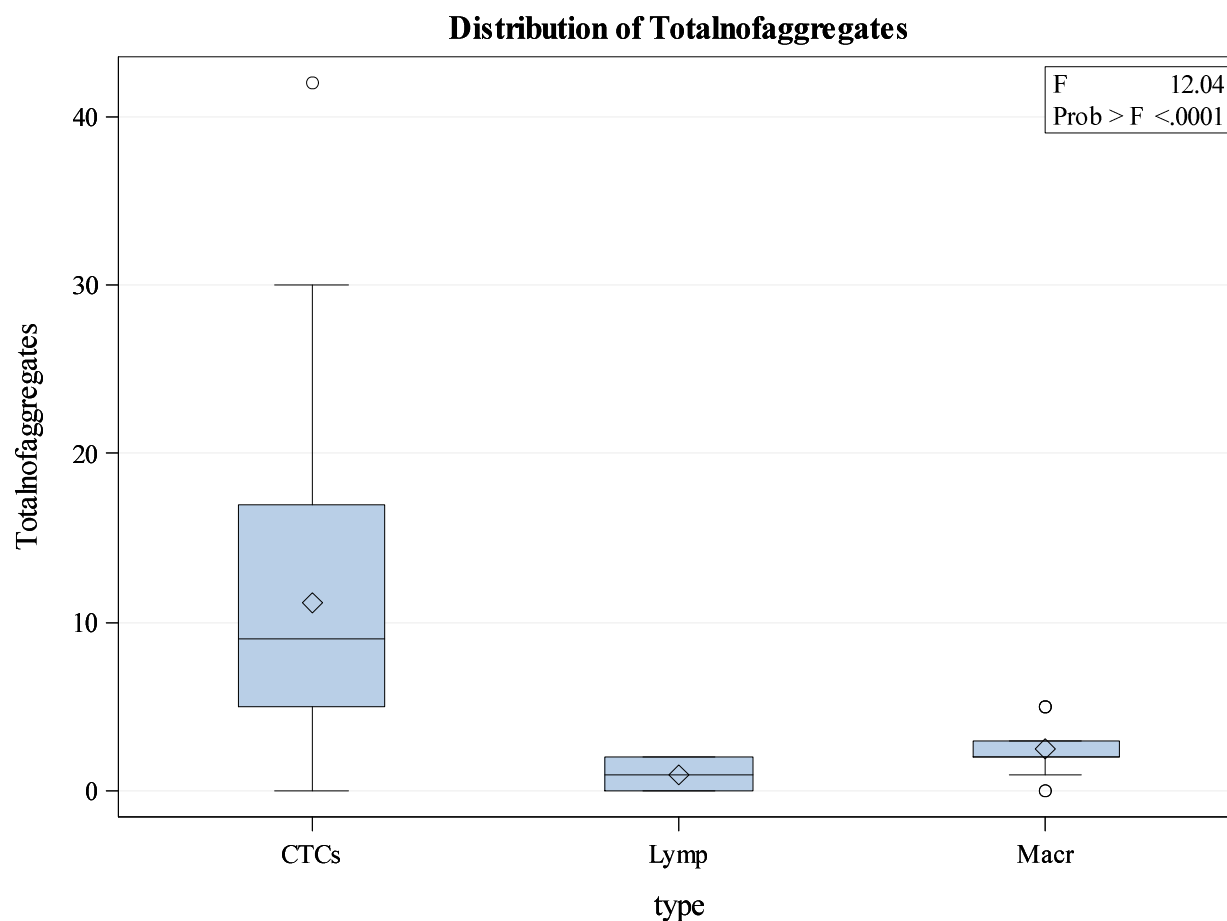

**The GLM Procedure**

**Dependent Variable: acratio**  
**acratio**

**pt=16AB0304**

| Source                 | DF | Sum of Squares | Mean Square | F Value | Pr > F |
|------------------------|----|----------------|-------------|---------|--------|
| <b>Model</b>           | 2  | 119.0228977    | 59.5114488  | 18.31   | <.0001 |
| <b>Error</b>           | 63 | 204.7902579    | 3.2506390   |         |        |
| <b>Corrected Total</b> | 65 | 323.8131556    |             |         |        |

| R-Square | Coeff Var | Root MSE | acratio Mean |
|----------|-----------|----------|--------------|
| 0.367567 | 47.81362  | 1.802953 | 3.770793     |

| Source      | DF | Type III SS | Mean Square | F Value | Pr > F |
|-------------|----|-------------|-------------|---------|--------|
| <b>type</b> | 2  | 119.0228977 | 59.5114488  | 18.31   | <.0001 |

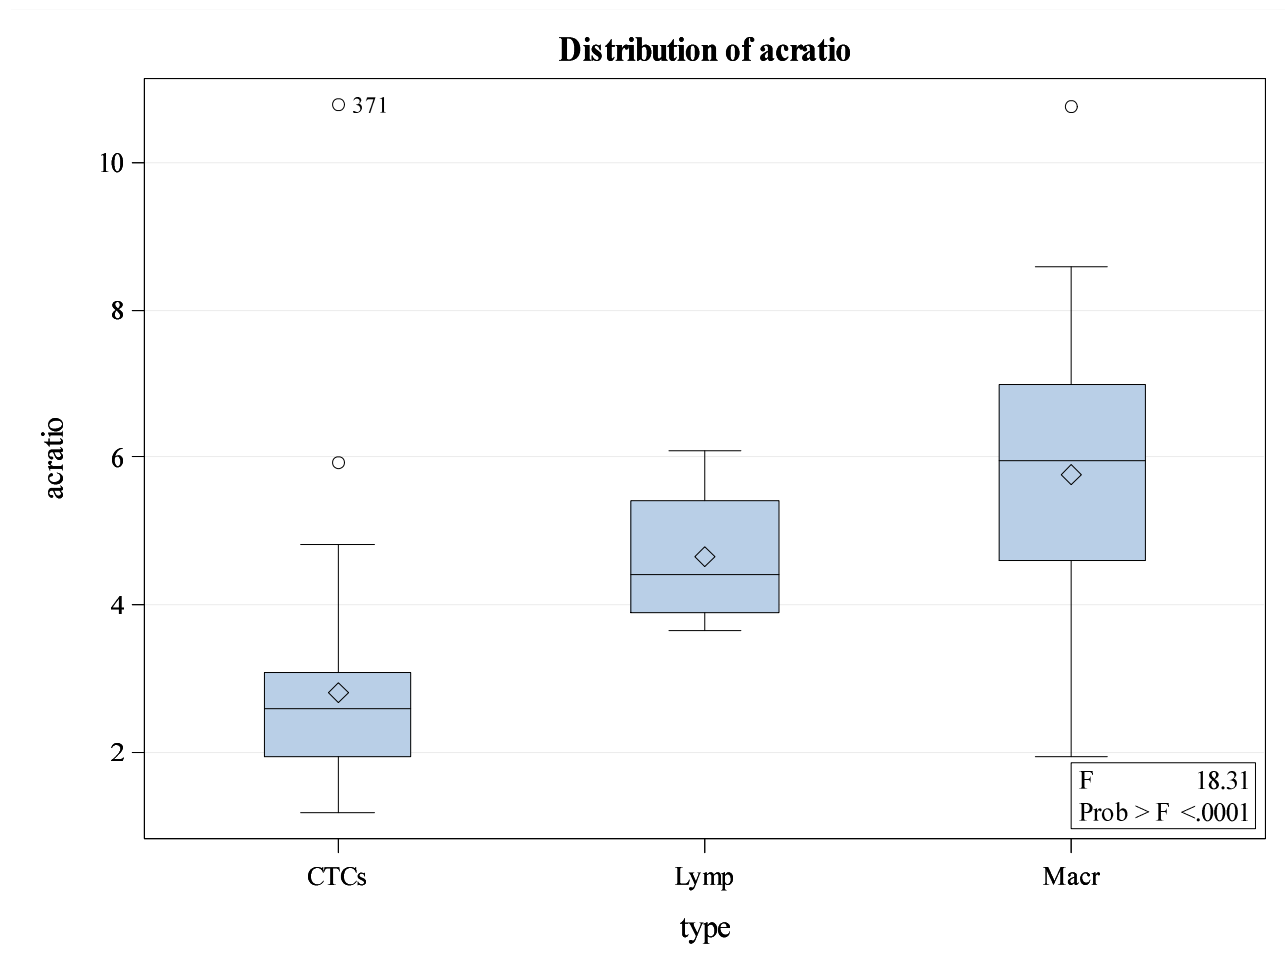



**The GLM Procedure**

**Dependent Variable: AvIntallsignals**  
**AvIntallsignals**

**pt=16AB0304**

| Source                 | DF | Sum of Squares | Mean Square | F Value | Pr > F |
|------------------------|----|----------------|-------------|---------|--------|
| <b>Model</b>           | 2  | 53997655.4     | 26998827.7  | 9.43    | 0.0003 |
| <b>Error</b>           | 63 | 180444107.7    | 2864192.2   |         |        |
| <b>Corrected Total</b> | 65 | 234441763.1    |             |         |        |

| R-Square | Coeff Var | Root MSE | AvIntallsignals Mean |
|----------|-----------|----------|----------------------|
| 0.230324 | 18.19323  | 1692.392 | 9302.322             |

| Source      | DF | Type III SS | Mean Square | F Value | Pr > F |
|-------------|----|-------------|-------------|---------|--------|
| <b>type</b> | 2  | 53997655.38 | 26998827.69 | 9.43    | 0.0003 |

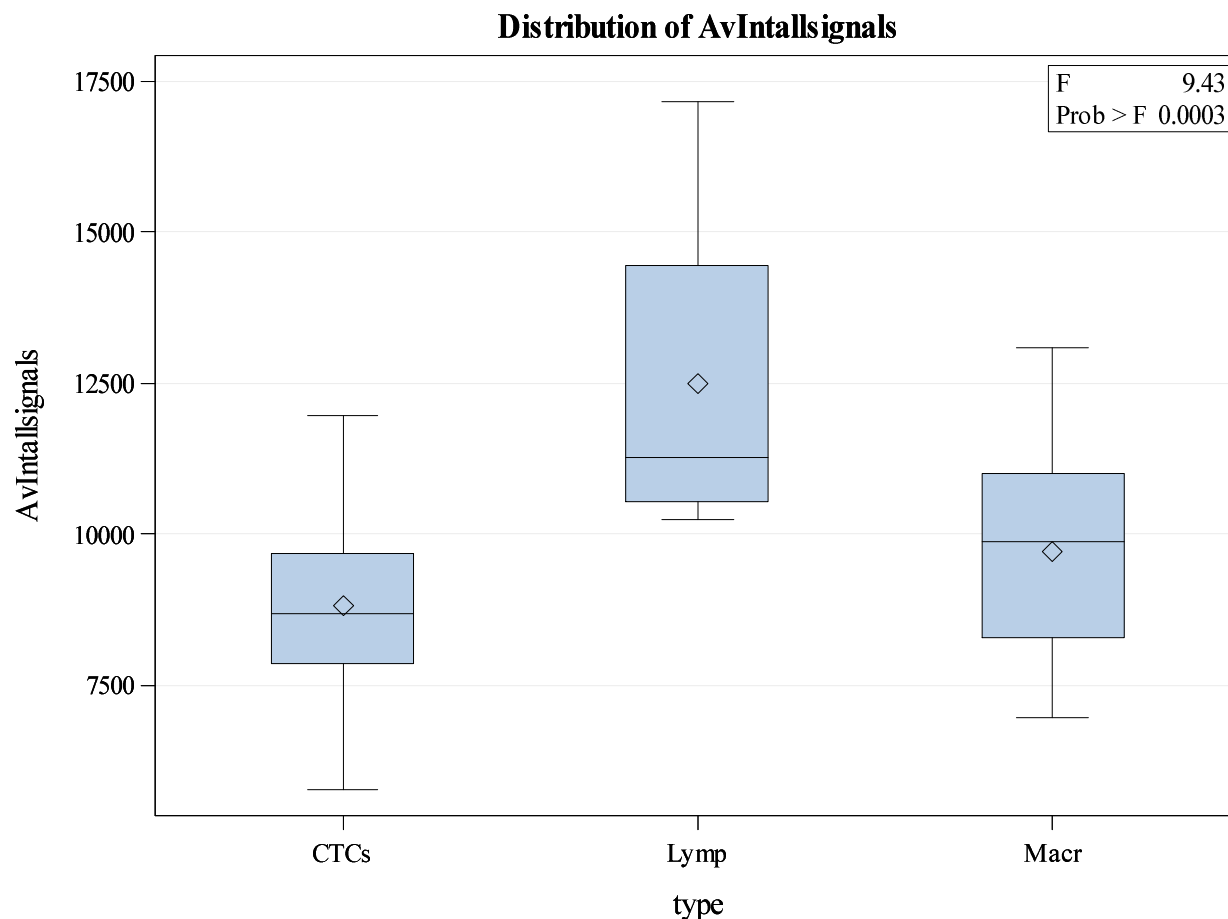

**The GLM Procedure**

**Dependent Variable: Totalintensity**  
**Totalintensity**

**pt=16AB0304**

| Source                 | DF | Sum of Squares | Mean Square  | F Value | Pr > F |
|------------------------|----|----------------|--------------|---------|--------|
| <b>Model</b>           | 2  | 4.5664197E12   | 2.2832099E12 | 33.68   | <.0001 |
| <b>Error</b>           | 63 | 4.2708147E12   | 67790709622  |         |        |
| <b>Corrected Total</b> | 65 | 8.8372344E12   |              |         |        |

| R-Square | Coeff Var | Root MSE | Totalintensity Mean |
|----------|-----------|----------|---------------------|
| 0.516725 | 41.57956  | 260366.5 | 626188.7            |

| Source      | DF | Type III SS  | Mean Square  | F Value | Pr > F |
|-------------|----|--------------|--------------|---------|--------|
| <b>type</b> | 2  | 4.5664197E12 | 2.2832099E12 | 33.68   | <.0001 |

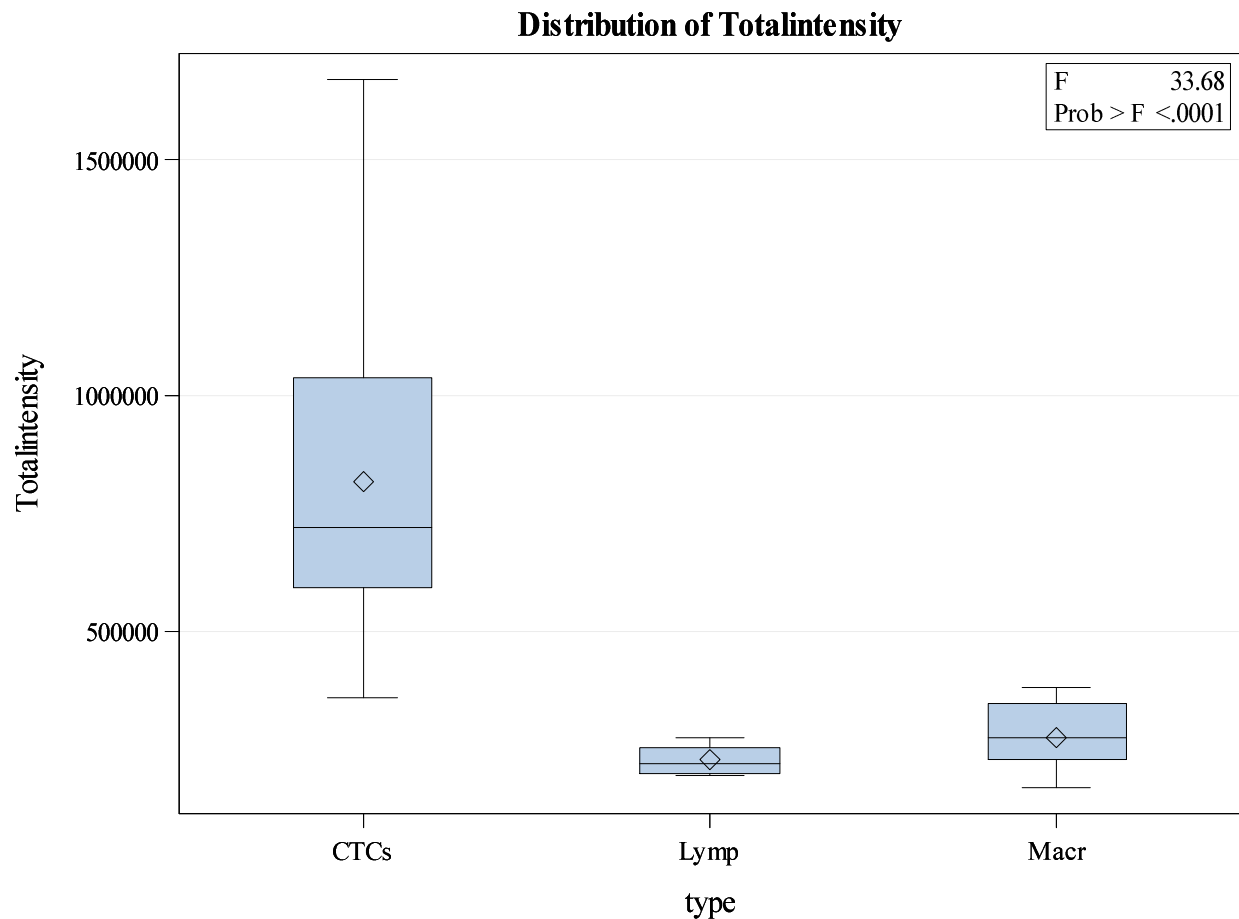

**The GLM Procedure**

**Dependent Variable: Nuclearvolume**  
**Nuclearvolume**

**pt=16AB0304**

| Source                 | DF | Sum of Squares | Mean Square  | F Value | Pr > F |
|------------------------|----|----------------|--------------|---------|--------|
| <b>Model</b>           | 2  | 3.3752698E12   | 1.6876349E12 | 9.56    | 0.0002 |
| <b>Error</b>           | 63 | 1.112016E13    | 176510482301 |         |        |
| <b>Corrected Total</b> | 65 | 1.449543E13    |              |         |        |

| R-Square | Coeff Var | Root MSE | Nuclearvolume Mean |
|----------|-----------|----------|--------------------|
| 0.232851 | 54.39994  | 420131.5 | 772301.4           |

| Source      | DF | Type III SS  | Mean Square  | F Value | Pr > F |
|-------------|----|--------------|--------------|---------|--------|
| <b>type</b> | 2  | 3.3752698E12 | 1.6876349E12 | 9.56    | 0.0002 |

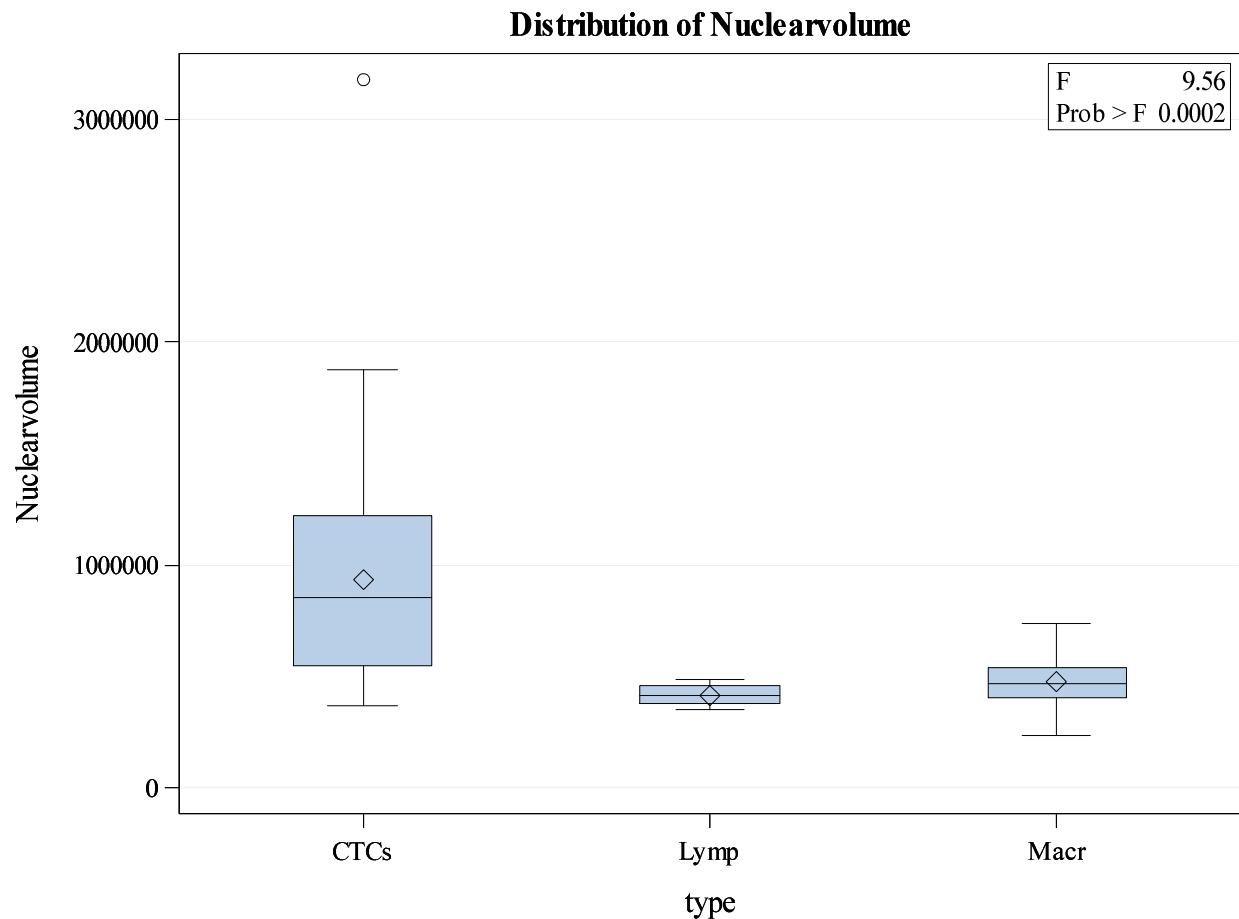

*The GLM Procedure**Dependent Variable: telomereperkvol*

pt=16AB0304

| Source                 | DF | Sum of Squares | Mean Square | F Value | Pr > F |
|------------------------|----|----------------|-------------|---------|--------|
| <b>Model</b>           | 2  | 0.03687050     | 0.01843525  | 38.34   | <.0001 |
| <b>Error</b>           | 63 | 0.03029535     | 0.00048088  |         |        |
| <b>Corrected Total</b> | 65 | 0.06716585     |             |         |        |

| R-Square | Coeff Var | Root MSE | telomereperkvol Mean |
|----------|-----------|----------|----------------------|
| 0.548947 | 24.05241  | 0.021929 | 0.091171             |

| Source      | DF | Type III SS | Mean Square | F Value | Pr > F |
|-------------|----|-------------|-------------|---------|--------|
| <b>type</b> | 2  | 0.03687050  | 0.01843525  | 38.34   | <.0001 |

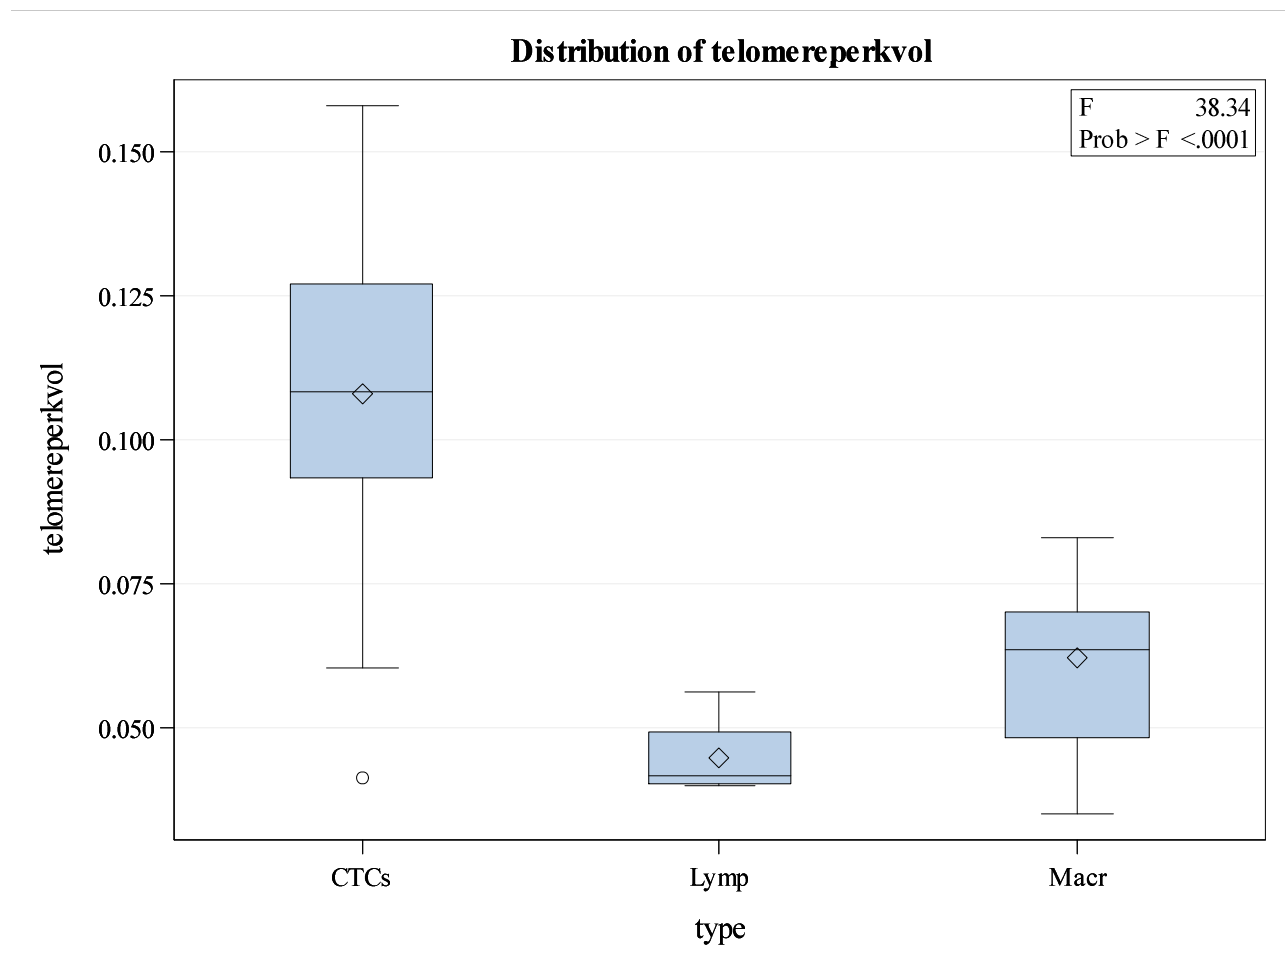

**The GLM Procedure**  
**Least Squares Means**

**pt=16AB0304**

| type        | Totalnofsignals<br>LSMEAN | Standard<br>Error | Pr >  t | LSMEAN<br>Number |
|-------------|---------------------------|-------------------|---------|------------------|
| <b>CTCs</b> | 97.2790698                | 5.9587238         | <.0001  | 1                |
| <b>Lymp</b> | 18.5000000                | 19.5369825        | 0.3473  | 2                |
| <b>Macr</b> | 28.2105263                | 8.9641824         | 0.0025  | 3                |

| Least Squares Means for effect type<br>Pr >  t  for H0: LSMean(i)=LSMean(j) |        |        |        |
|-----------------------------------------------------------------------------|--------|--------|--------|
| Dependent Variable: Totalnofsignals                                         |        |        |        |
| i/j                                                                         | 1      | 2      | 3      |
| 1                                                                           |        | 0.0003 | <.0001 |
| 2                                                                           | 0.0003 |        | 0.6530 |
| 3                                                                           | <.0001 | 0.6530 |        |

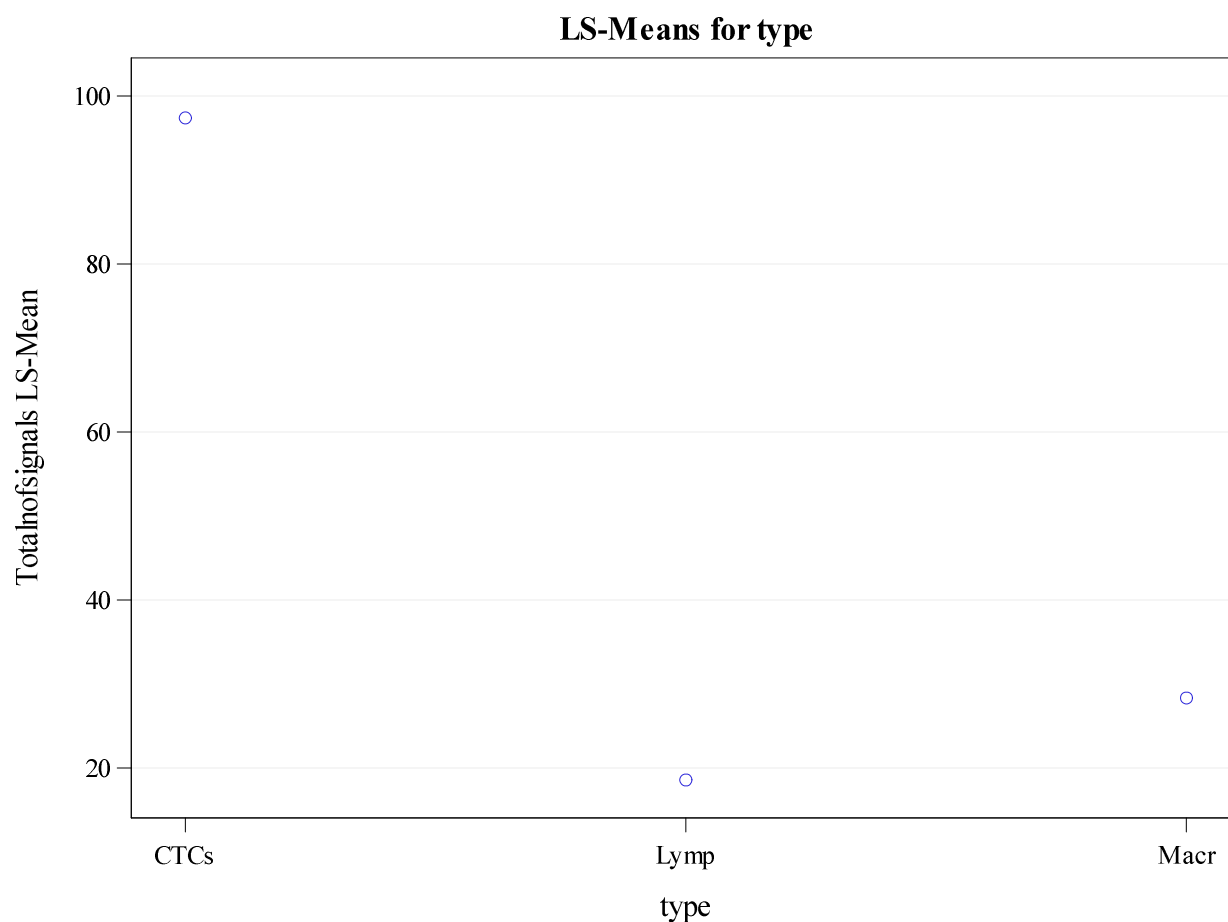

***The GLM Procedure***  
***Least Squares Means***

**pt=16AB0304**

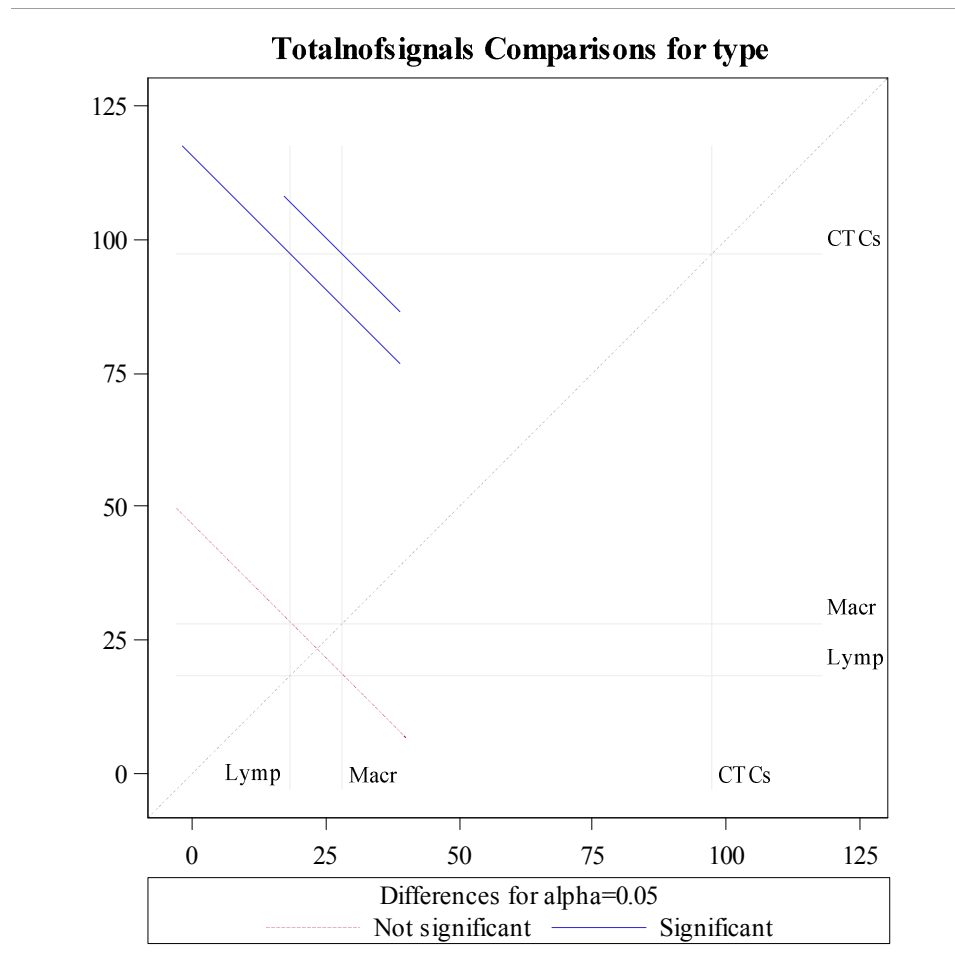

| type        | Totalnofaggregates<br>LSMEAN | Standard<br>Error | Pr >  t | LSMEAN<br>Number |
|-------------|------------------------------|-------------------|---------|------------------|
| <b>CTCs</b> | 11.2093023                   | 1.0851277         | <.0001  | 1                |
| <b>Lymp</b> | 1.0000000                    | 3.5578290         | 0.7796  | 2                |
| <b>Macr</b> | 2.4736842                    | 1.6324439         | 0.1347  | 3                |

***The GLM Procedure***  
***Least Squares Means***

**pt=16AB0304**

| Least Squares Means for effect type<br>Pr >  t  for H0: LSMean(i)=LSMean(j) |        |        |        |
|-----------------------------------------------------------------------------|--------|--------|--------|
| Dependent Variable: Totalnofaggregates                                      |        |        |        |
| i/j                                                                         | 1      | 2      | 3      |
| 1                                                                           |        | 0.0079 | <.0001 |
| 2                                                                           | 0.0079 |        | 0.7078 |
| 3                                                                           | <.0001 | 0.7078 |        |

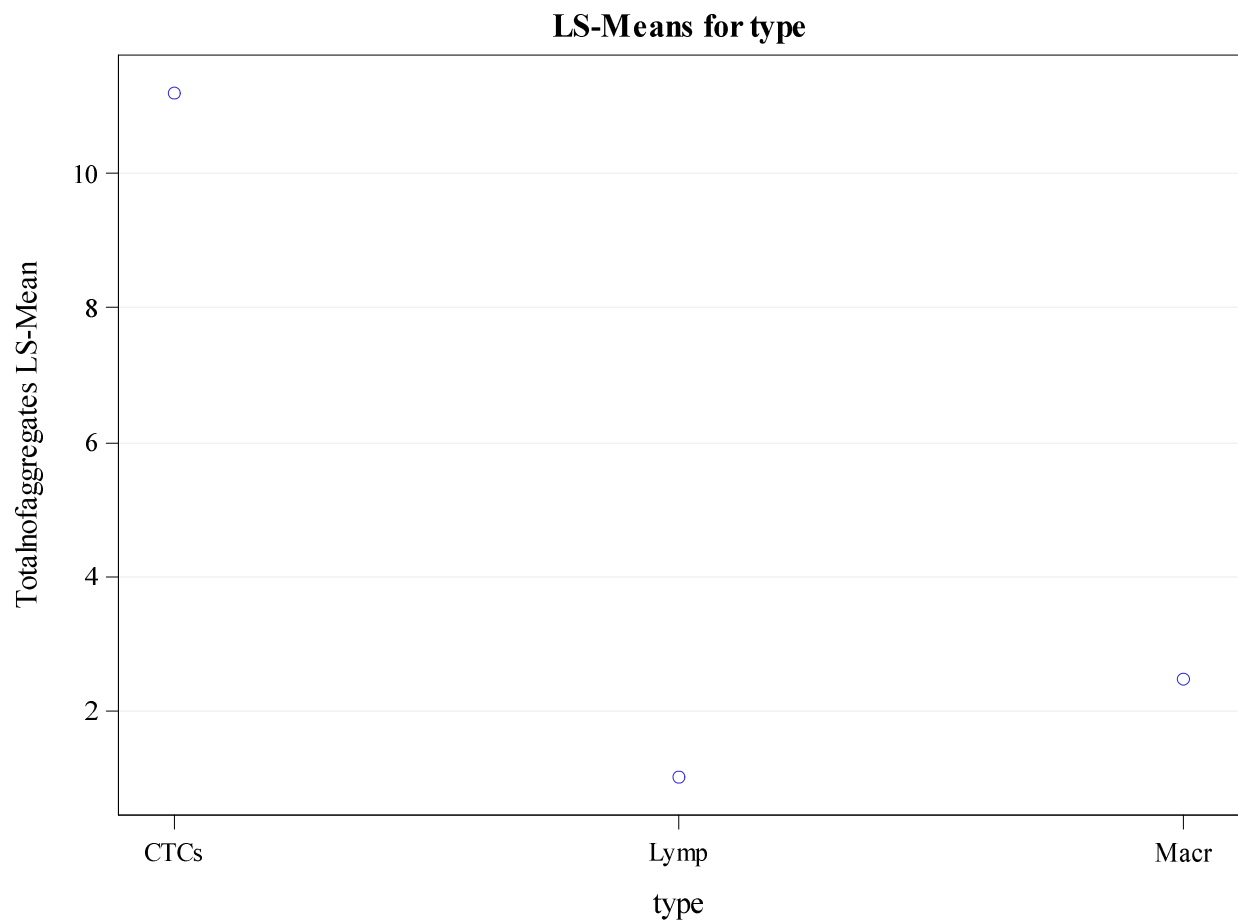

**The GLM Procedure**  
**Least Squares Means**

pt=16AB0304

**Totalnofaggagates Comparisons for type**

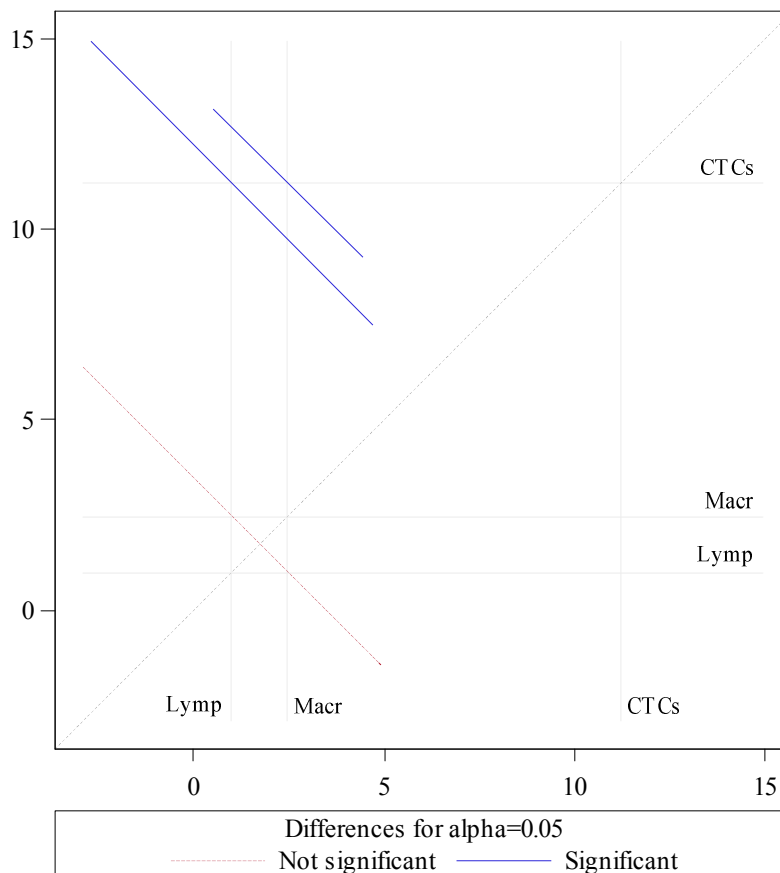

| type        | acratio<br>LSMEAN | Standard<br>Error | Pr >  t | LSMEAN<br>Number |
|-------------|-------------------|-------------------|---------|------------------|
| <b>CTCs</b> | 2.80619455        | 0.27494773        | <.0001  | 1                |
| <b>Lymp</b> | 4.64135848        | 0.90147643        | <.0001  | 2                |
| <b>Macr</b> | 5.77055619        | 0.41362575        | <.0001  | 3                |

| Least Squares Means for effect type<br>Pr >  t  for H0: LSMean(i)=LSMean(j) |        |        |        |
|-----------------------------------------------------------------------------|--------|--------|--------|
| Dependent Variable: acratio                                                 |        |        |        |
| i/j                                                                         | 1      | 2      | 3      |
| 1                                                                           |        | 0.0560 | <.0001 |
| 2                                                                           | 0.0560 |        | 0.2592 |
| 3                                                                           | <.0001 | 0.2592 |        |



*The GLM Procedure*  
*Least Squares Means*

pt=16AB0304

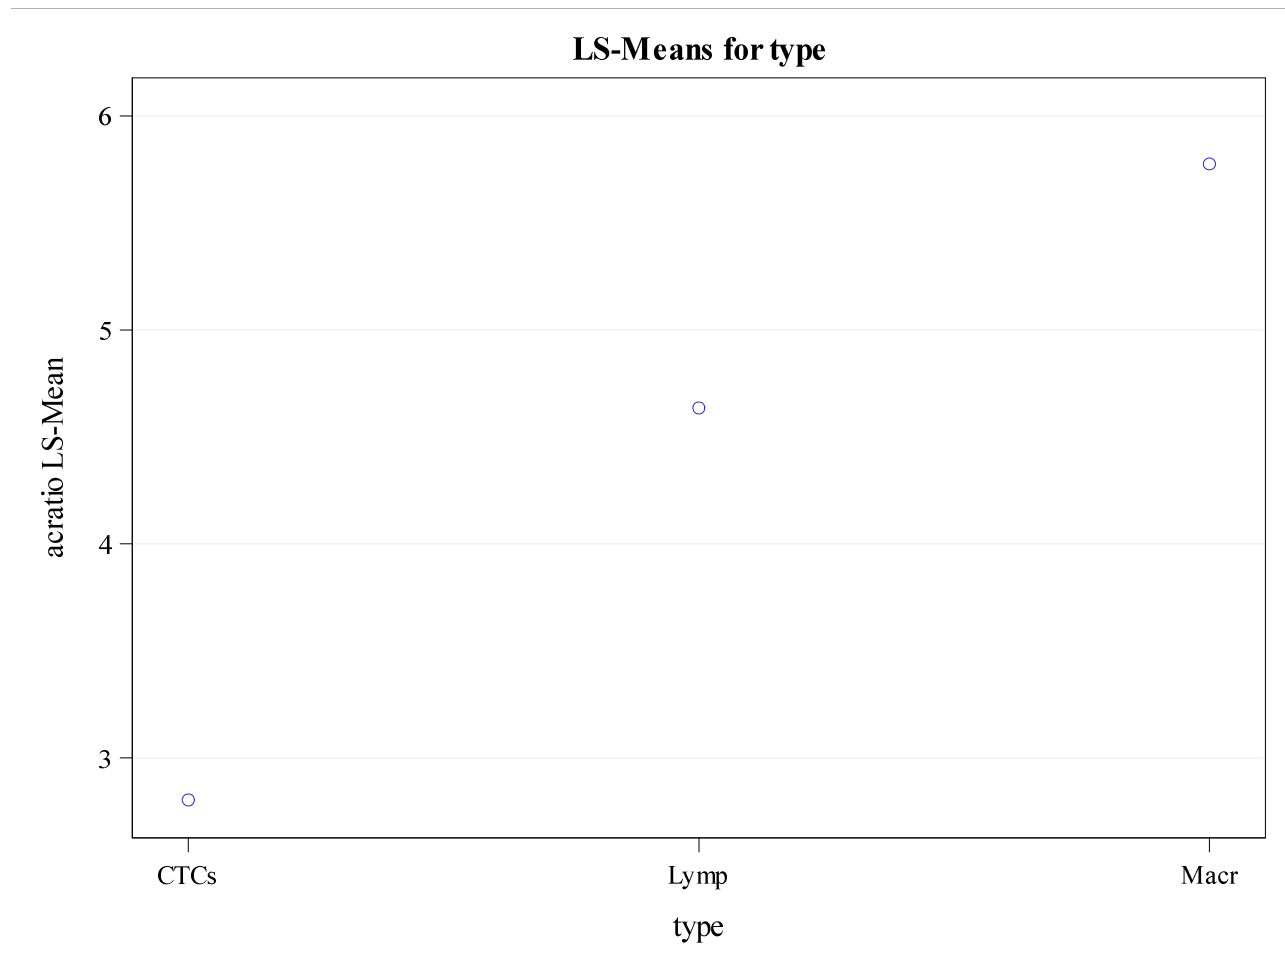

**The GLM Procedure**  
**Least Squares Means**

**pt=16AB0304**

**acratio Comparisons for type**

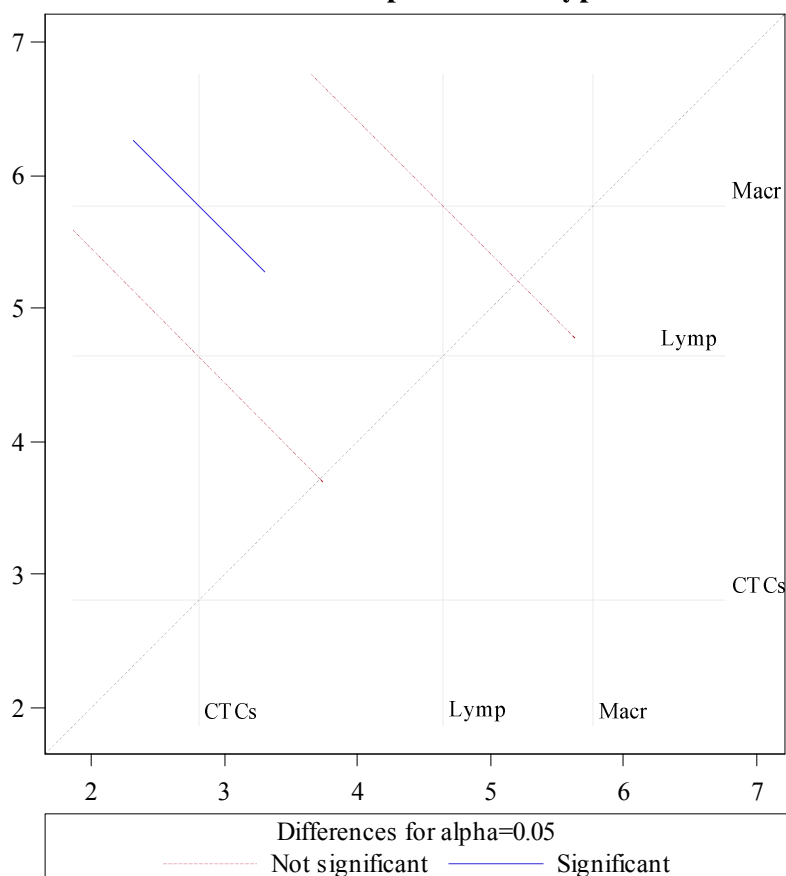

| type        | AvIntallsignals<br>LSMEAN | Standard<br>Error | Pr >  t | LSMEAN<br>Number |
|-------------|---------------------------|-------------------|---------|------------------|
| <b>CTCs</b> | 8819.4850                 | 258.0874          | <.0001  | 1                |
| <b>Lymp</b> | 12487.7361                | 846.1962          | <.0001  | 2                |
| <b>Macr</b> | 9724.4436                 | 388.2615          | <.0001  | 3                |

| Least Squares Means for effect type<br>Pr >  t  for H0: LSMean(i)=LSMean(j) |        |        |        |
|-----------------------------------------------------------------------------|--------|--------|--------|
| Dependent Variable: AvIntallsignals                                         |        |        |        |
| i/j                                                                         | 1      | 2      | 3      |
| 1                                                                           |        | 0.0001 | 0.0567 |
| 2                                                                           | 0.0001 |        | 0.0042 |
| 3                                                                           | 0.0567 | 0.0042 |        |

*The GLM Procedure*  
*Least Squares Means*

pt=16AB0304

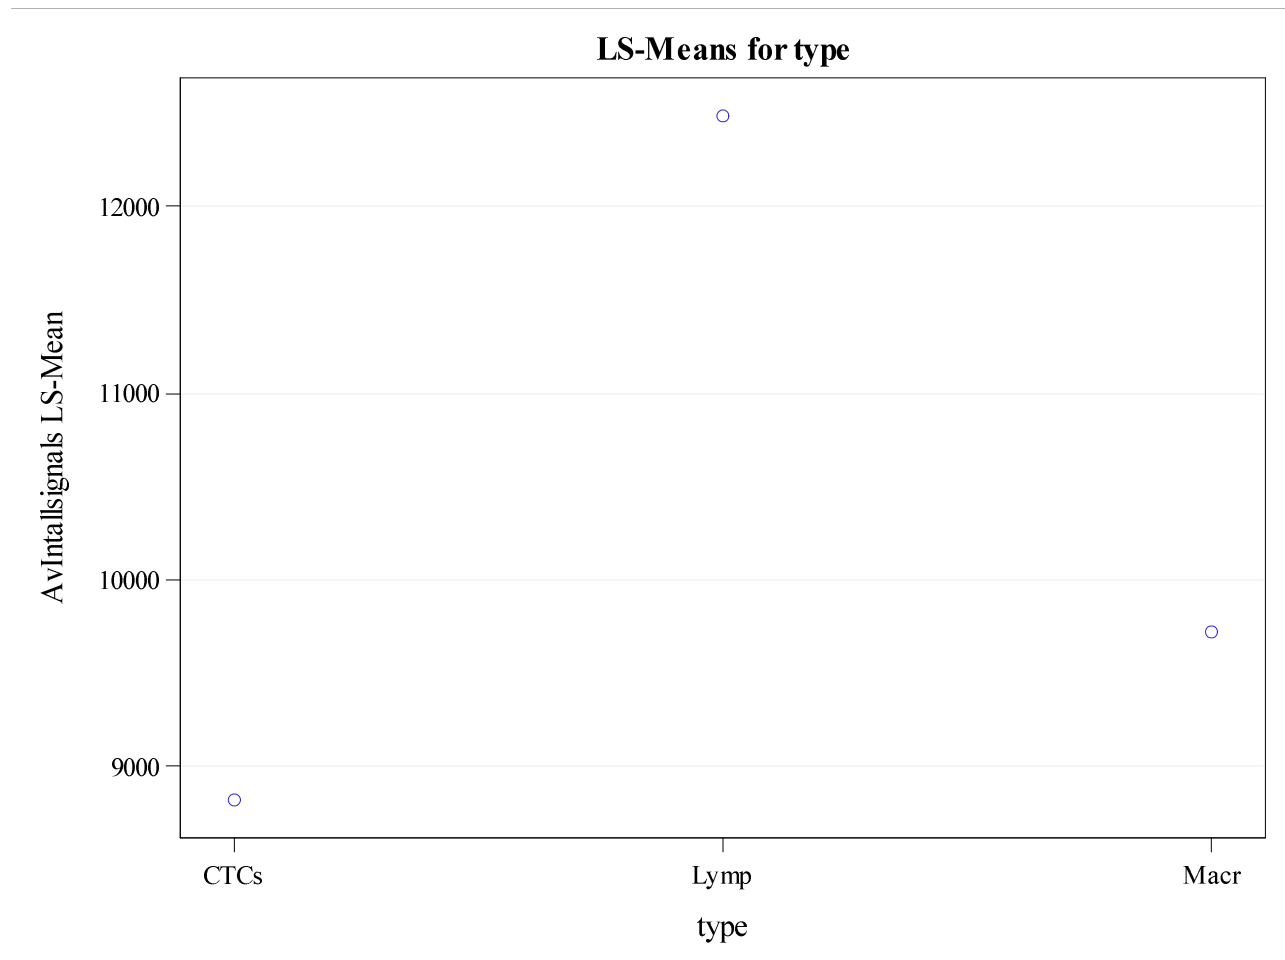

**The GLM Procedure**  
**Least Squares Means**

**pt=16AB0304**

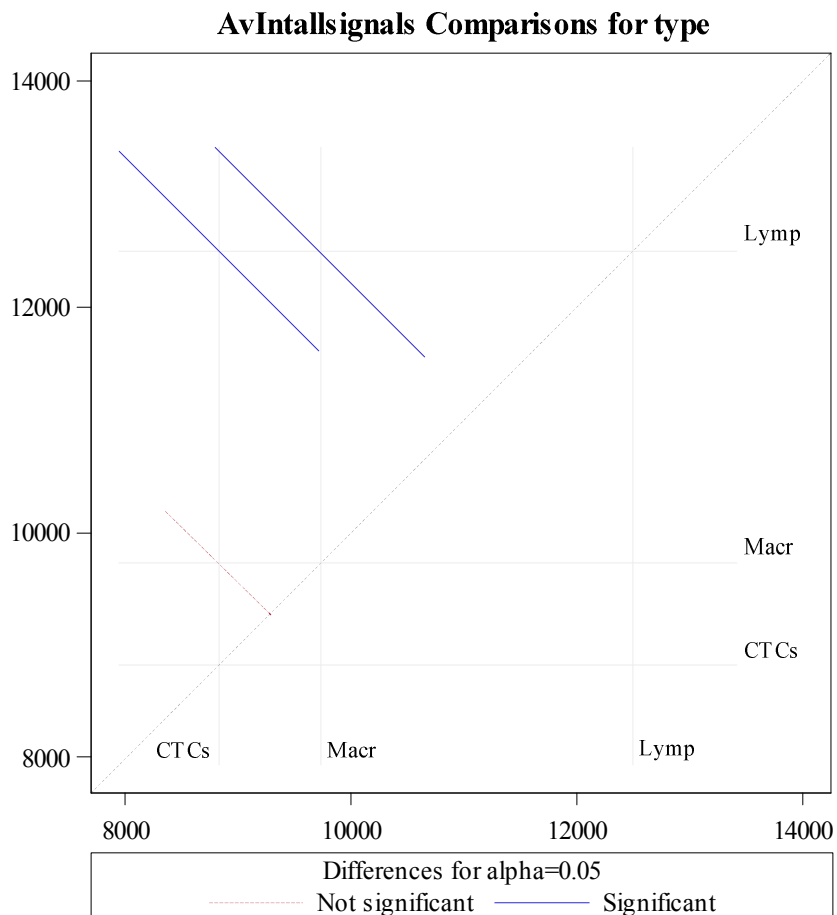

| type        | Totalintensity<br>LSMEAN | Standard<br>Error | Pr >  t | LSMEAN<br>Number |
|-------------|--------------------------|-------------------|---------|------------------|
| <b>CTCs</b> | 818401.977               | 39705.518         | <.0001  | 1                |
| <b>Lymp</b> | 227186.000               | 130183.245        | 0.0858  | 2                |
| <b>Macr</b> | 275180.263               | 59732.170         | <.0001  | 3                |

| Least Squares Means for effect type<br>Pr >  t  for H0: LSMean(i)=LSMean(j) |        |        |        |
|-----------------------------------------------------------------------------|--------|--------|--------|
| Dependent Variable: Totalintensity                                          |        |        |        |
| i/j                                                                         | 1      | 2      | 3      |
| 1                                                                           |        | <.0001 | <.0001 |
| 2                                                                           | <.0001 |        | 0.7387 |
| 3                                                                           | <.0001 | 0.7387 |        |

*The GLM Procedure*  
*Least Squares Means*

pt=16AB0304

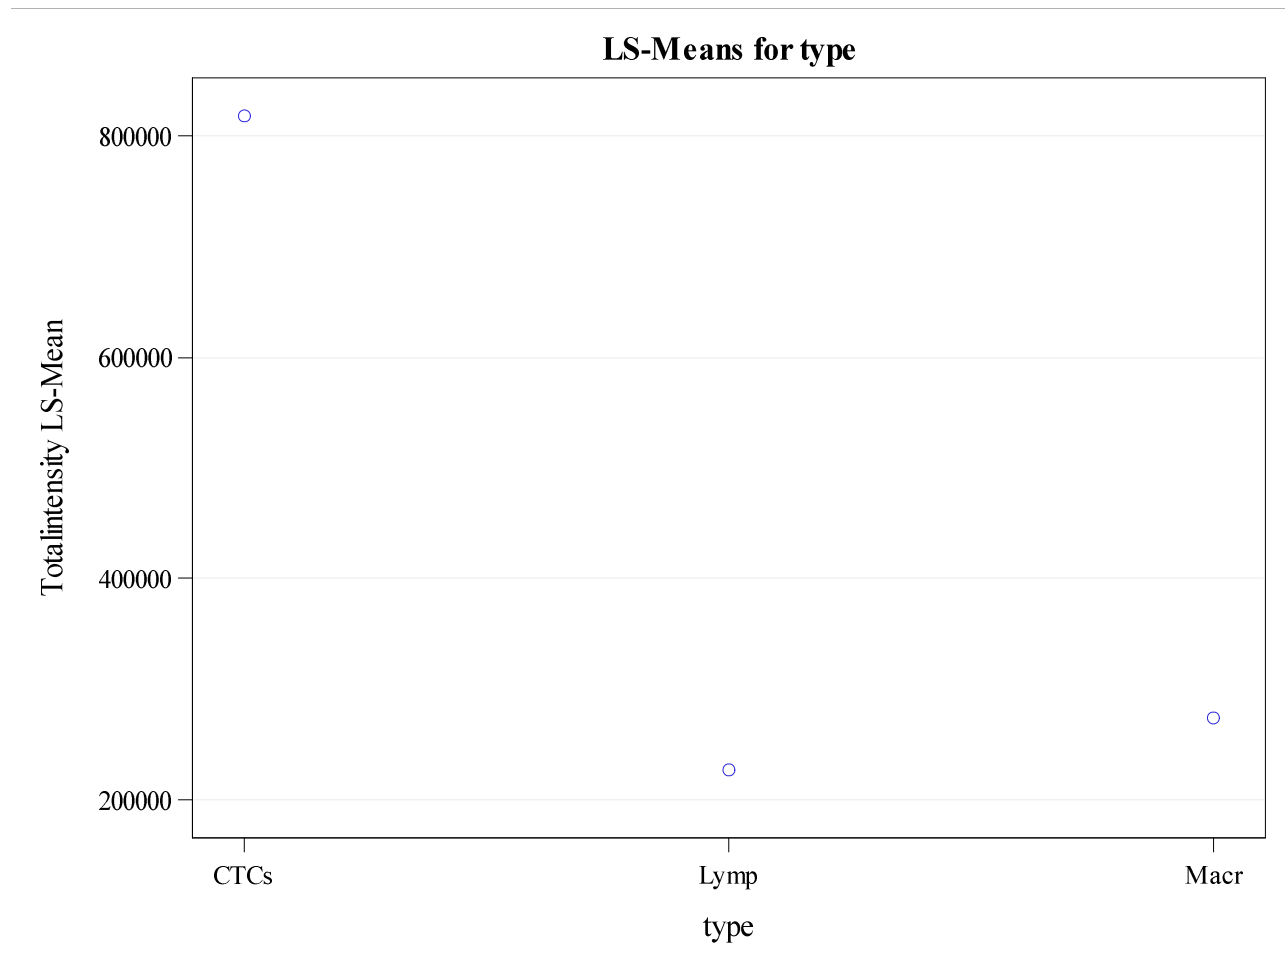

***The GLM Procedure***  
***Least Squares Means***

**pt=16AB0304**

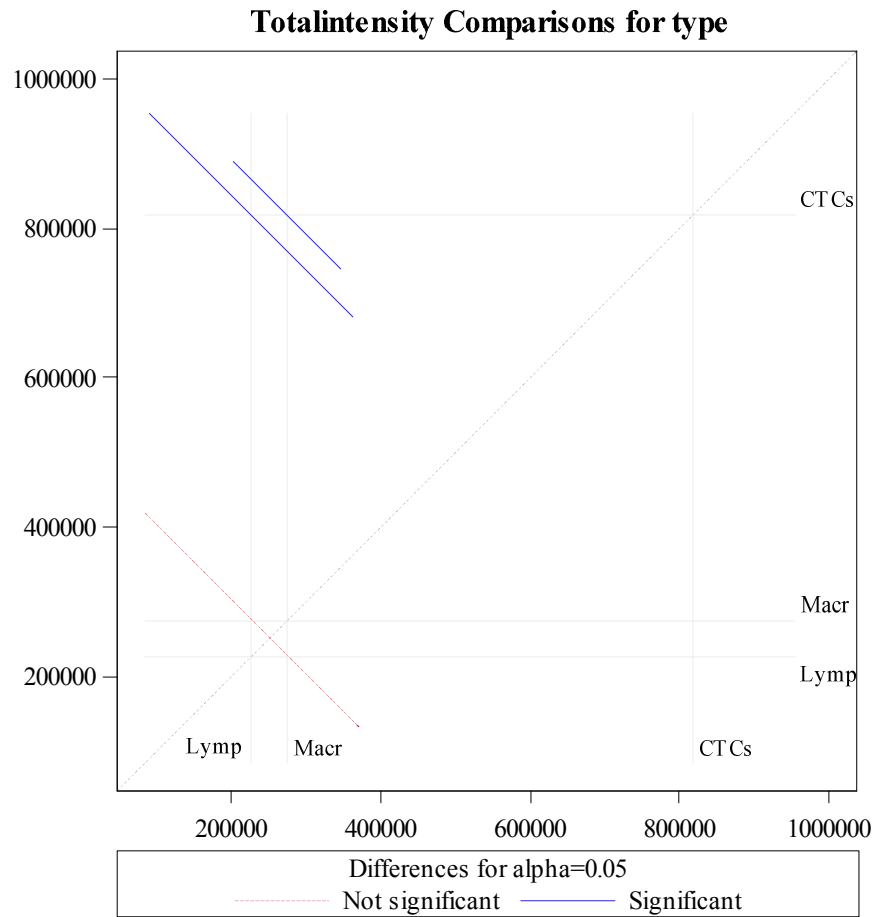

| type        | Nuclearvolume<br>LSMEAN | Standard<br>Error | Pr >  t | LSMEAN<br>Number |
|-------------|-------------------------|-------------------|---------|------------------|
| <b>CTCs</b> | 937431.884              | 64069.454         | <.0001  | 1                |
| <b>Lymp</b> | 416729.750              | 210065.753        | 0.0516  | 2                |
| <b>Macr</b> | 473442.368              | 96384.778         | <.0001  | 3                |

| Least Squares Means for effect type<br>Pr >  t  for H0: LSMean(i)=LSMean(j) |        |        |        |
|-----------------------------------------------------------------------------|--------|--------|--------|
| Dependent Variable: Nuclearvolume                                           |        |        |        |
| i/j                                                                         | 1      | 2      | 3      |
| 1                                                                           |        | 0.0208 | 0.0002 |
| 2                                                                           | 0.0208 |        | 0.8070 |
| 3                                                                           | 0.0002 | 0.8070 |        |

*The GLM Procedure*  
*Least Squares Means*

pt=16AB0304

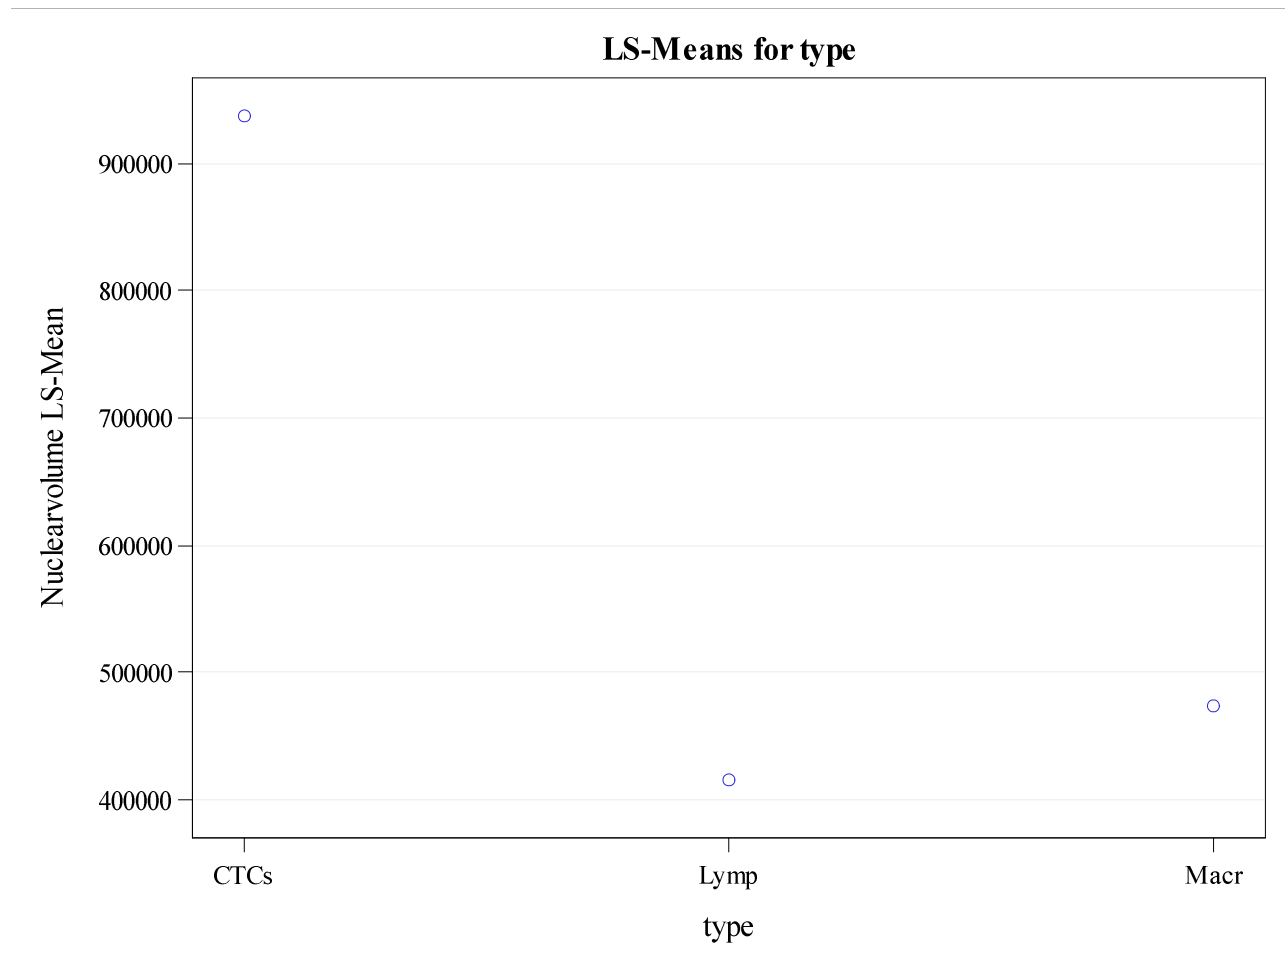

**The GLM Procedure**  
**Least Squares Means**

**pt=16AB0304**

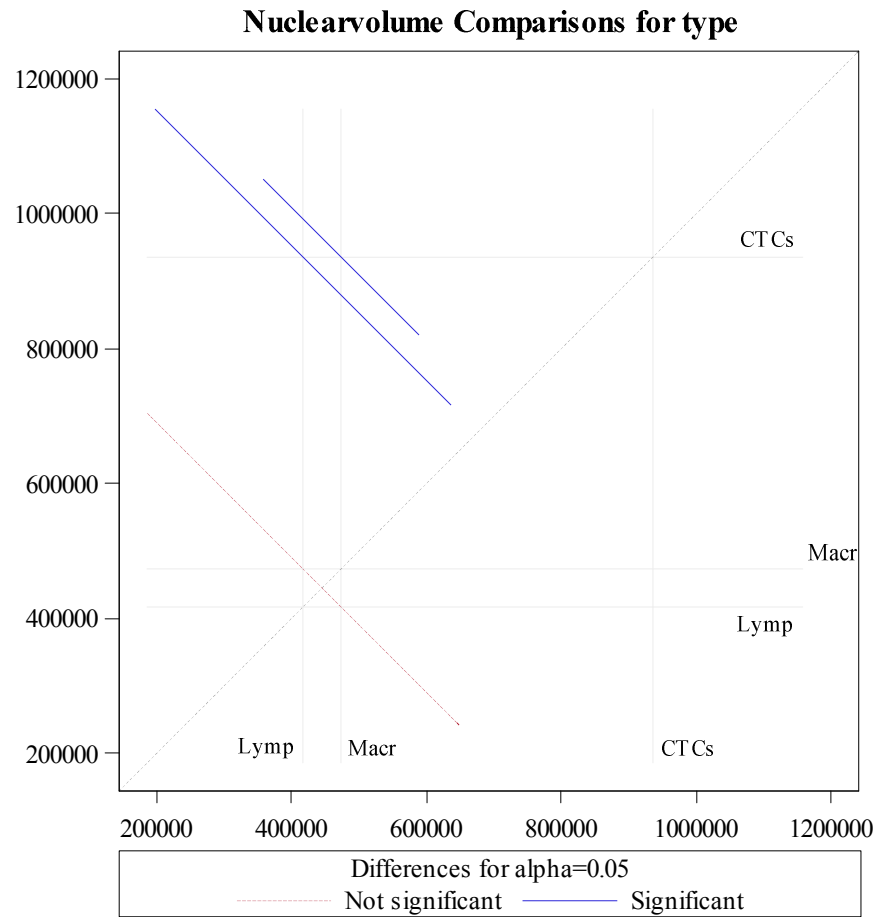

| type         | telomereperkvol<br>LSMEAN | Standard<br>Error | Pr >  t | LSMEAN<br>Number |
|--------------|---------------------------|-------------------|---------|------------------|
| <b>CTCs</b>  | 0.10822202                | 0.00334413        | <.0001  | 1                |
| <b>Lymph</b> | 0.04493719                | 0.01096447        | 0.0001  | 2                |
| <b>Macr</b>  | 0.06231698                | 0.00503084        | <.0001  | 3                |

| Least Squares Means for effect type<br>Pr >  t  for H0: LSMean(i)=LSMean(j) |        |        |        |
|-----------------------------------------------------------------------------|--------|--------|--------|
| Dependent Variable: telomereperkvol                                         |        |        |        |
| i/j                                                                         | 1      | 2      | 3      |
| 1                                                                           |        | <.0001 | <.0001 |
| 2                                                                           | <.0001 |        | 0.1546 |
| 3                                                                           | <.0001 | 0.1546 |        |



*The GLM Procedure*  
*Least Squares Means*

pt=16AB0304

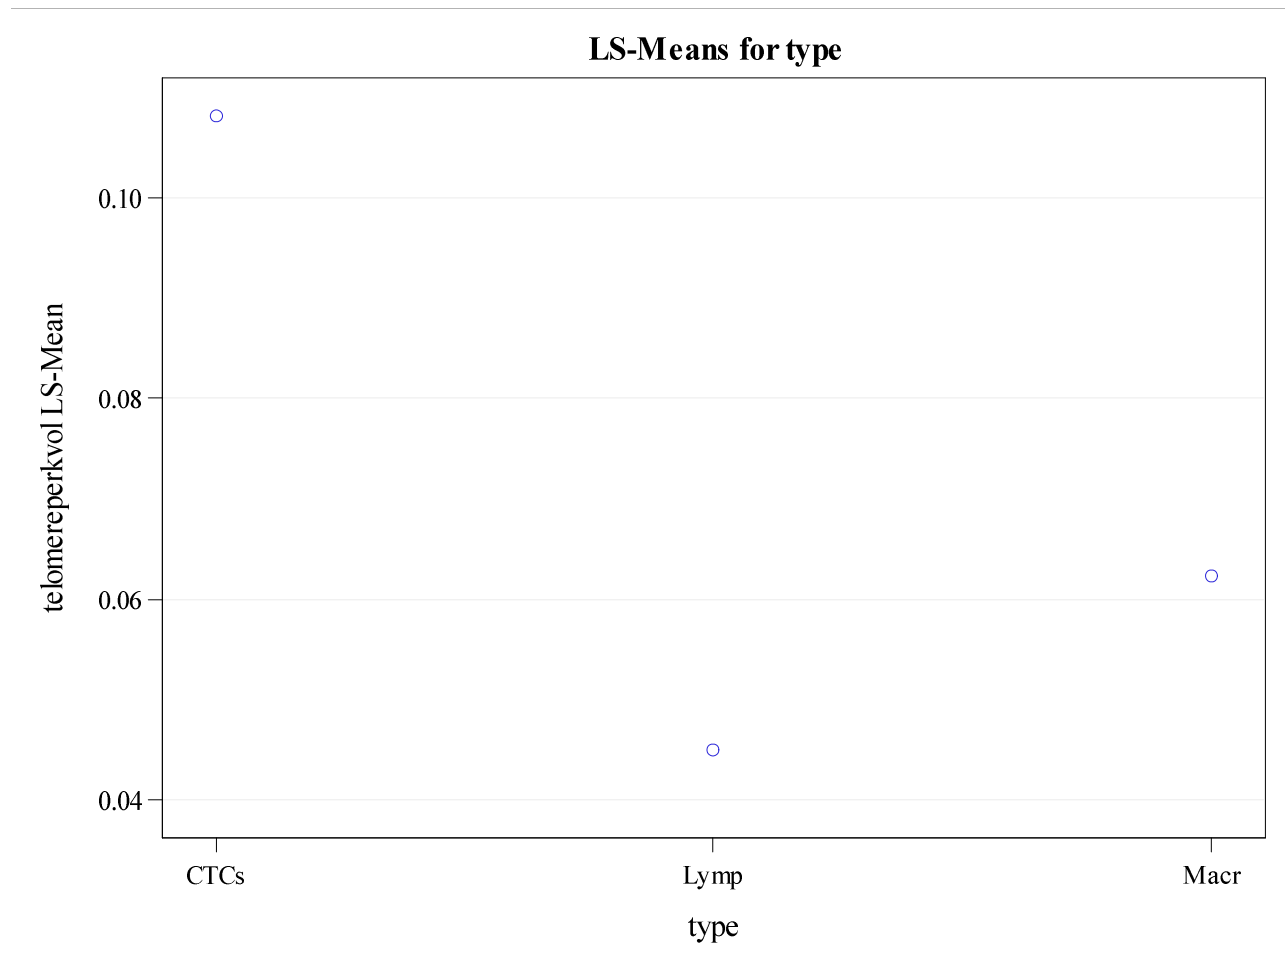

*The GLM Procedure*  
*Least Squares Means*

pt=16AB0304

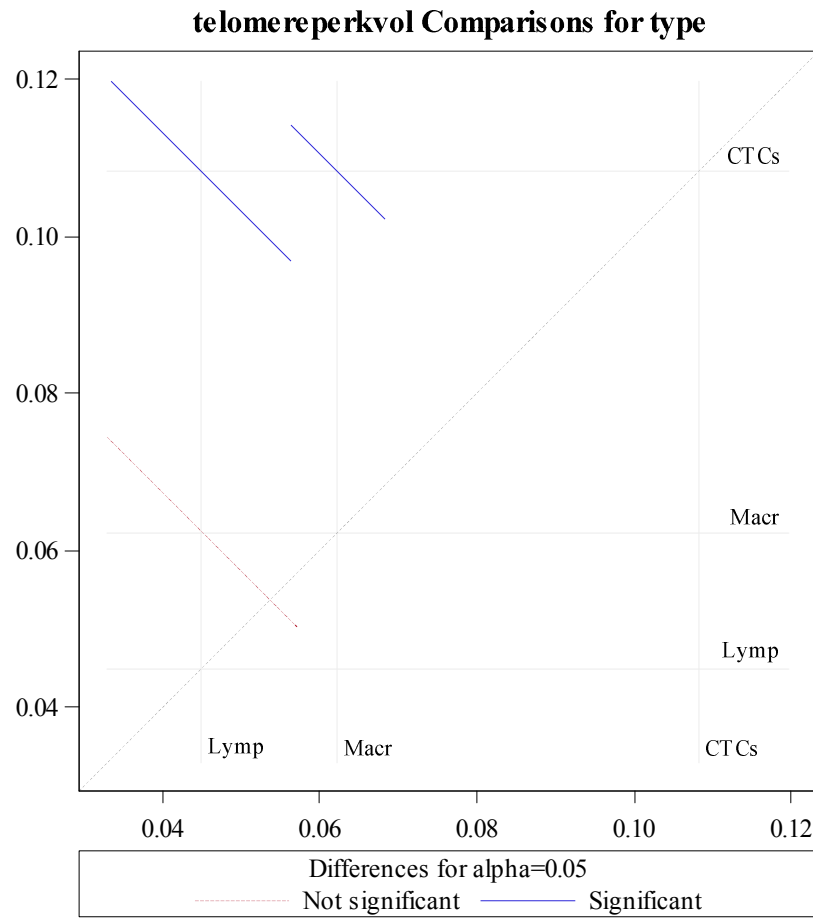

**Note:** To ensure overall protection level, only probabilities associated with pre-planned comparisons should be used.

*The GLM Procedure*

pt=17AA0828

| Class Level Information |        |                 |
|-------------------------|--------|-----------------|
| Class                   | Levels | Values          |
| type                    | 3      | CTCs Lymph Macr |

|                             |    |
|-----------------------------|----|
| Number of Observations Read | 81 |
| Number of Observations Used | 81 |

**The GLM Procedure**

**Dependent Variable: Totalnofsignals**  
**Totalnofsignals**

**pt=17AA0828**

| Source                 | DF | Sum of Squares | Mean Square | F Value | Pr > F |
|------------------------|----|----------------|-------------|---------|--------|
| <b>Model</b>           | 2  | 220600.3385    | 110300.1692 | 34.61   | <.0001 |
| <b>Error</b>           | 78 | 248557.6121    | 3186.6361   |         |        |
| <b>Corrected Total</b> | 80 | 469157.9506    |             |         |        |

| R-Square | Coeff Var | Root MSE | Totalnofsignals Mean |
|----------|-----------|----------|----------------------|
| 0.470205 | 74.30085  | 56.45030 | 75.97531             |

| Source      | DF | Type III SS | Mean Square | F Value | Pr > F |
|-------------|----|-------------|-------------|---------|--------|
| <b>type</b> | 2  | 220600.3385 | 110300.1692 | 34.61   | <.0001 |

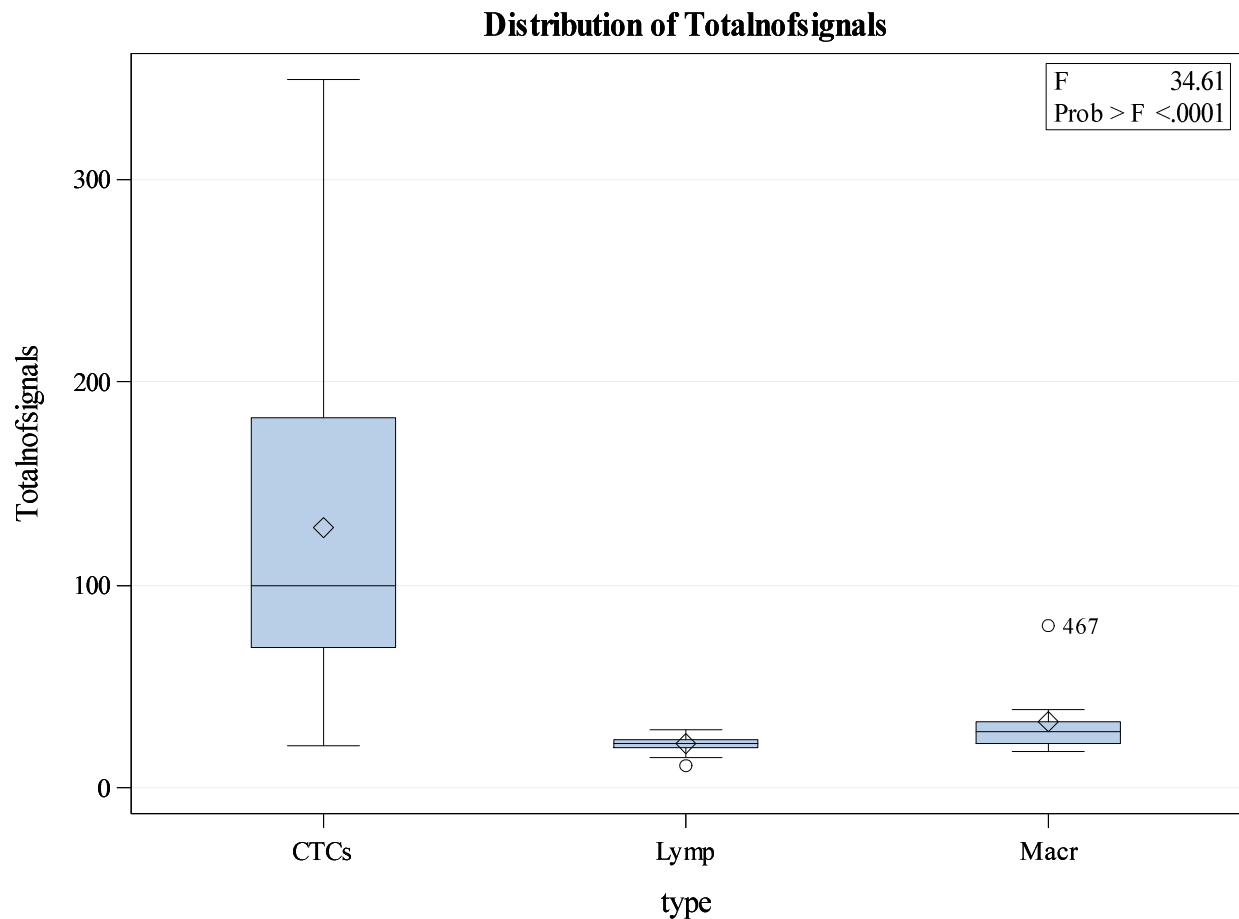

*The GLM Procedure***Dependent Variable: Totalnofaggregates Totalnofaggregates****pt=17AA0828**

| Source                 | DF | Sum of Squares | Mean Square | F Value | Pr > F |
|------------------------|----|----------------|-------------|---------|--------|
| <b>Model</b>           | 2  | 4123.21930     | 2061.60965  | 22.92   | <.0001 |
| <b>Error</b>           | 78 | 7017.17576     | 89.96379    |         |        |
| <b>Corrected Total</b> | 80 | 11140.39506    |             |         |        |

| R-Square | Coeff Var | Root MSE | Totalnofaggregates Mean |
|----------|-----------|----------|-------------------------|
| 0.370114 | 104.3857  | 9.484924 | 9.086420                |

| Source      | DF | Type III SS | Mean Square | F Value | Pr > F |
|-------------|----|-------------|-------------|---------|--------|
| <b>type</b> | 2  | 4123.219304 | 2061.609652 | 22.92   | <.0001 |

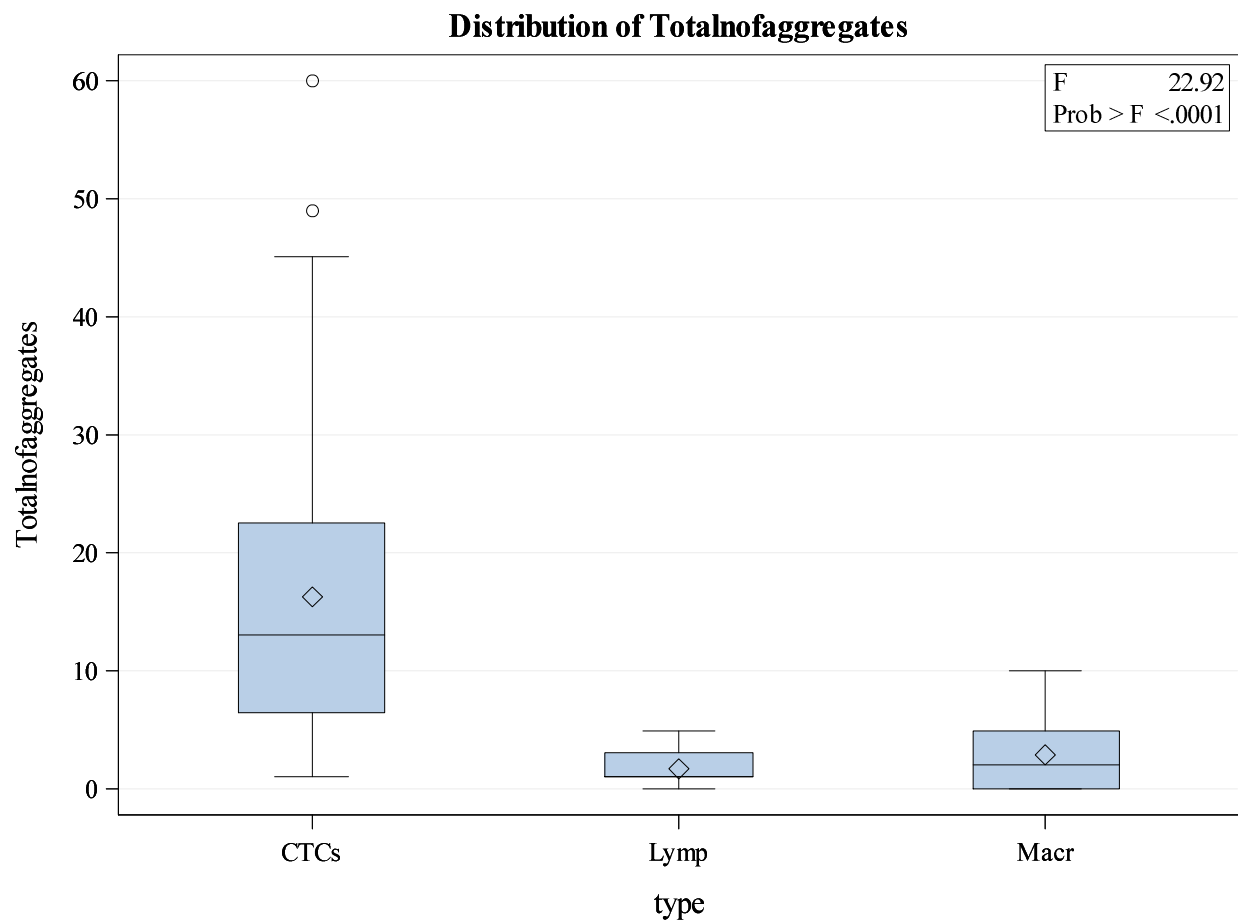

*The GLM Procedure*

**Dependent Variable: acratio**  
**acratio**

**pt=17AA0828**

| Source                 | DF | Sum of Squares | Mean Square | F Value | Pr > F |
|------------------------|----|----------------|-------------|---------|--------|
| <b>Model</b>           | 2  | 67.9803130     | 33.9901565  | 31.22   | <.0001 |
| <b>Error</b>           | 78 | 84.9334397     | 1.0888903   |         |        |
| <b>Corrected Total</b> | 80 | 152.9137527    |             |         |        |

| R-Square | Coeff Var | Root MSE | acratio Mean |
|----------|-----------|----------|--------------|
| 0.444566 | 40.44454  | 1.043499 | 2.580074     |

| Source      | DF | Type III SS | Mean Square | F Value | Pr > F |
|-------------|----|-------------|-------------|---------|--------|
| <b>type</b> | 2  | 67.98031303 | 33.99015652 | 31.22   | <.0001 |

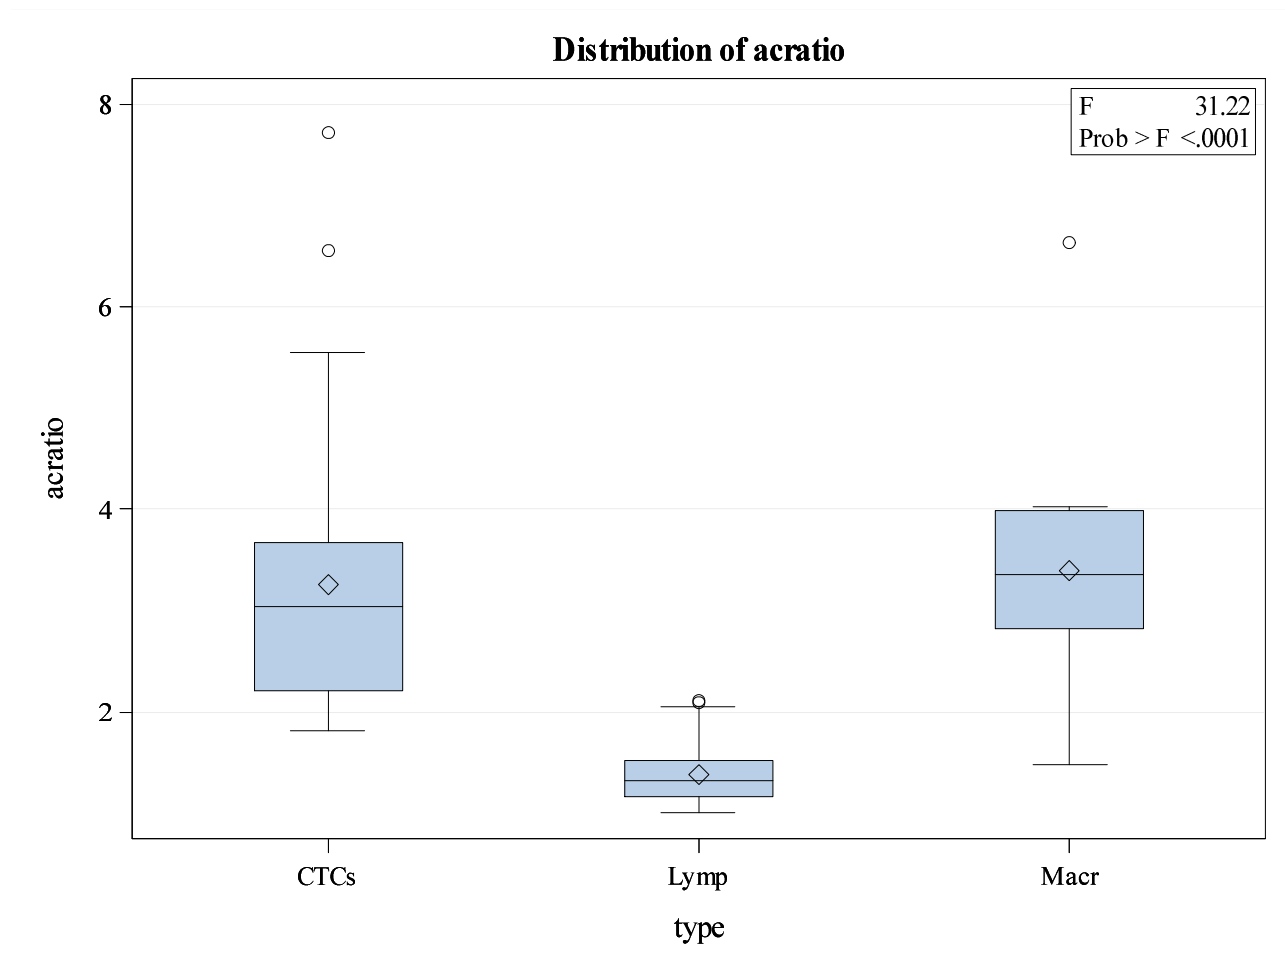

**The GLM Procedure**

**Dependent Variable: AvIntallsignals**  
**AvIntallsignals**

**pt=17AA0828**

| Source                 | DF | Sum of Squares | Mean Square | F Value | Pr > F |
|------------------------|----|----------------|-------------|---------|--------|
| <b>Model</b>           | 2  | 6575299708     | 3287649854  | 166.76  | <.0001 |
| <b>Error</b>           | 78 | 1537750260     | 19714747    |         |        |
| <b>Corrected Total</b> | 80 | 8113049968     |             |         |        |

| R-Square | Coeff Var | Root MSE | AvIntallsignals Mean |
|----------|-----------|----------|----------------------|
| 0.810460 | 26.17835  | 4440.129 | 16961.08             |

| Source      | DF | Type III SS | Mean Square | F Value | Pr > F |
|-------------|----|-------------|-------------|---------|--------|
| <b>type</b> | 2  | 6575299708  | 3287649854  | 166.76  | <.0001 |

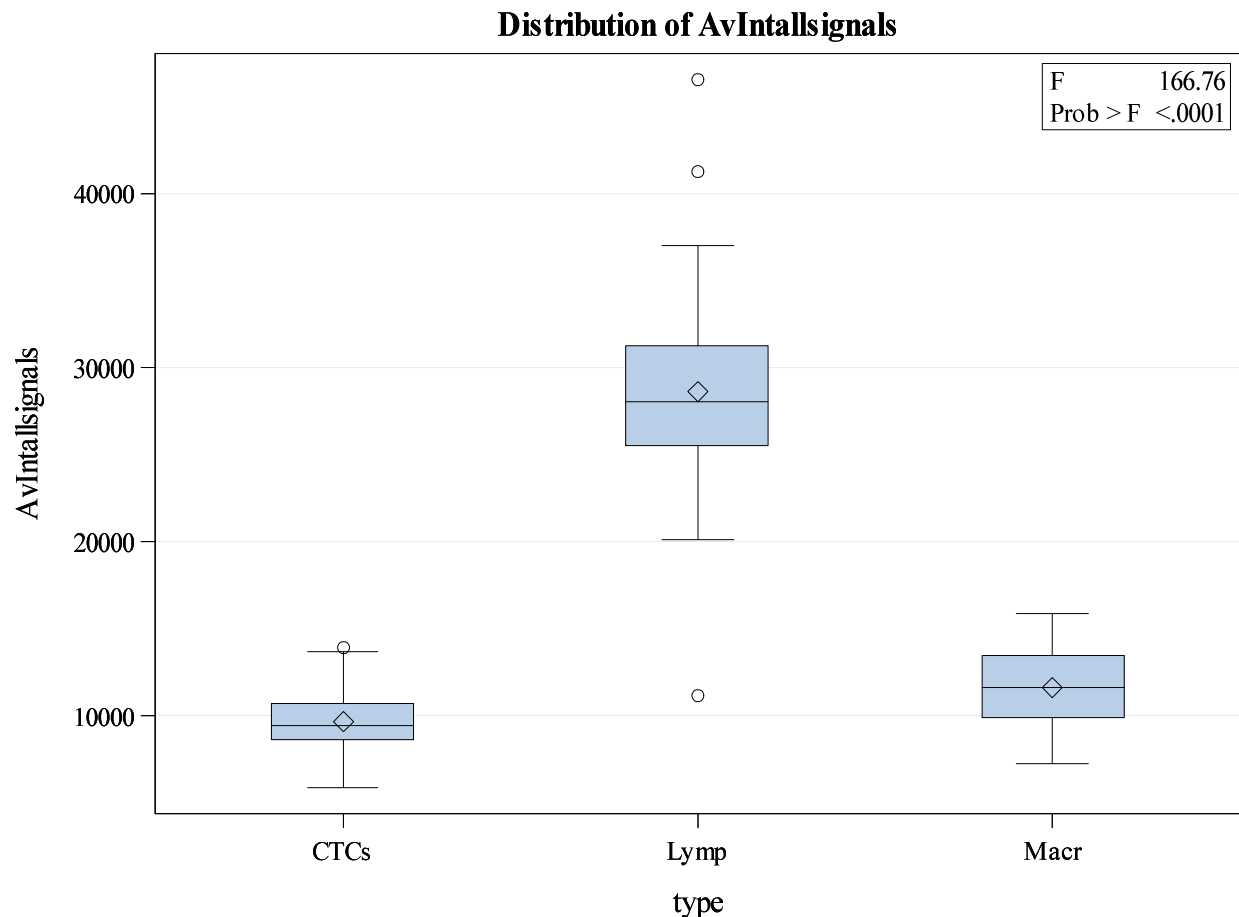

**The GLM Procedure**

**Dependent Variable: Totalintensity**  
**Totalintensity**

**pt=17AA0828**

| Source                 | DF | Sum of Squares | Mean Square  | F Value | Pr > F |
|------------------------|----|----------------|--------------|---------|--------|
| <b>Model</b>           | 2  | 9.6780785E12   | 4.8390392E12 | 17.70   | <.0001 |
| <b>Error</b>           | 78 | 2.1329685E13   | 273457503658 |         |        |
| <b>Corrected Total</b> | 80 | 3.1007764E13   |              |         |        |

| R-Square | Coeff Var | Root MSE | Totalintensity Mean |
|----------|-----------|----------|---------------------|
| 0.312118 | 59.66239  | 522931.6 | 876484.6            |

| Source      | DF | Type III SS  | Mean Square  | F Value | Pr > F |
|-------------|----|--------------|--------------|---------|--------|
| <b>type</b> | 2  | 9.6780785E12 | 4.8390392E12 | 17.70   | <.0001 |

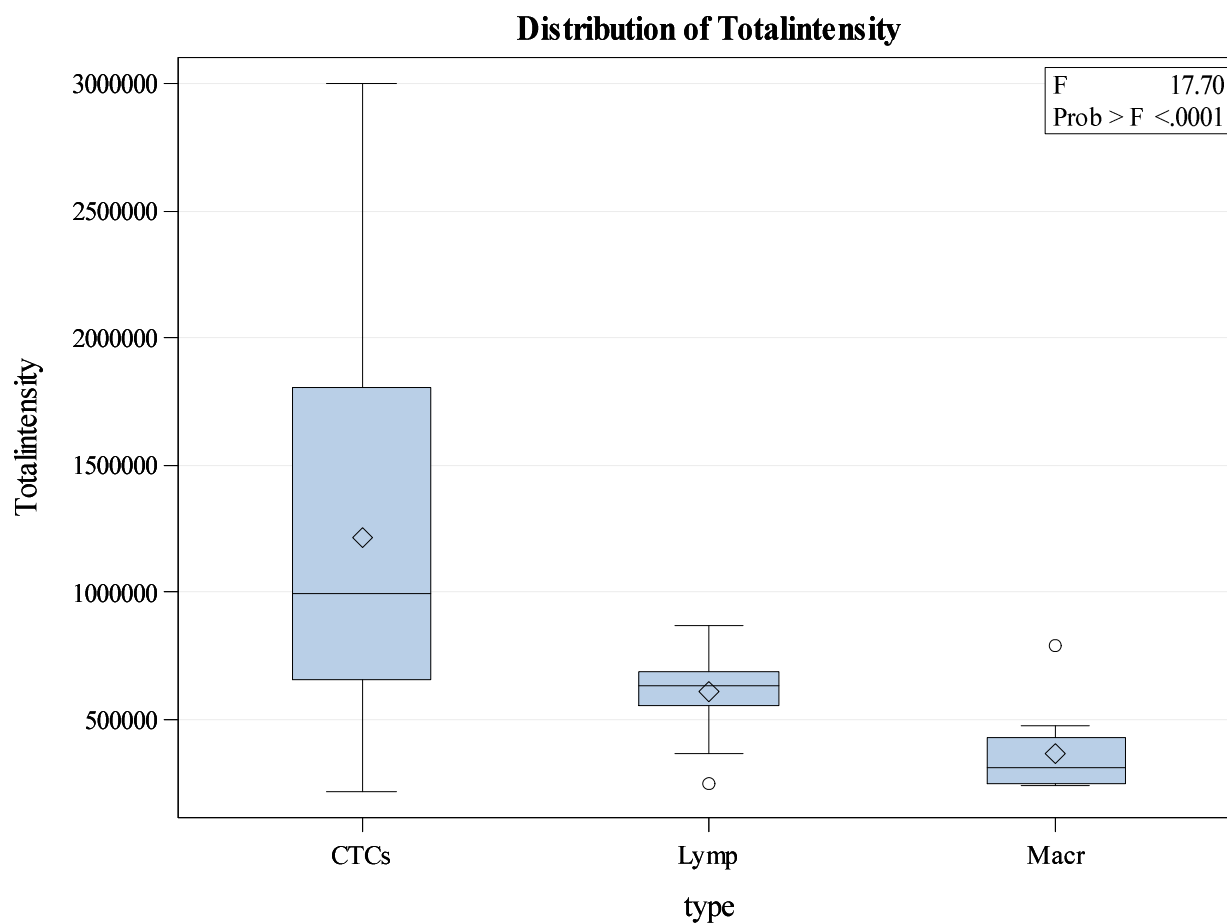



**The GLM Procedure**

**Dependent Variable: Nuclearvolume**  
**Nuclearvolume**

**pt=17AA0828**

| Source                 | DF | Sum of Squares | Mean Square  | F Value | Pr > F |
|------------------------|----|----------------|--------------|---------|--------|
| <b>Model</b>           | 2  | 1.3242953E13   | 6.6214763E12 | 56.36   | <.0001 |
| <b>Error</b>           | 78 | 9.1640463E12   | 117487772980 |         |        |
| <b>Corrected Total</b> | 80 | 2.2406999E13   |              |         |        |

| R-Square | Coeff Var | Root MSE | Nuclearvolume Mean |
|----------|-----------|----------|--------------------|
| 0.591019 | 56.52520  | 342764.9 | 606393.0           |

| Source      | DF | Type III SS  | Mean Square  | F Value | Pr > F |
|-------------|----|--------------|--------------|---------|--------|
| <b>type</b> | 2  | 1.3242953E13 | 6.6214763E12 | 56.36   | <.0001 |

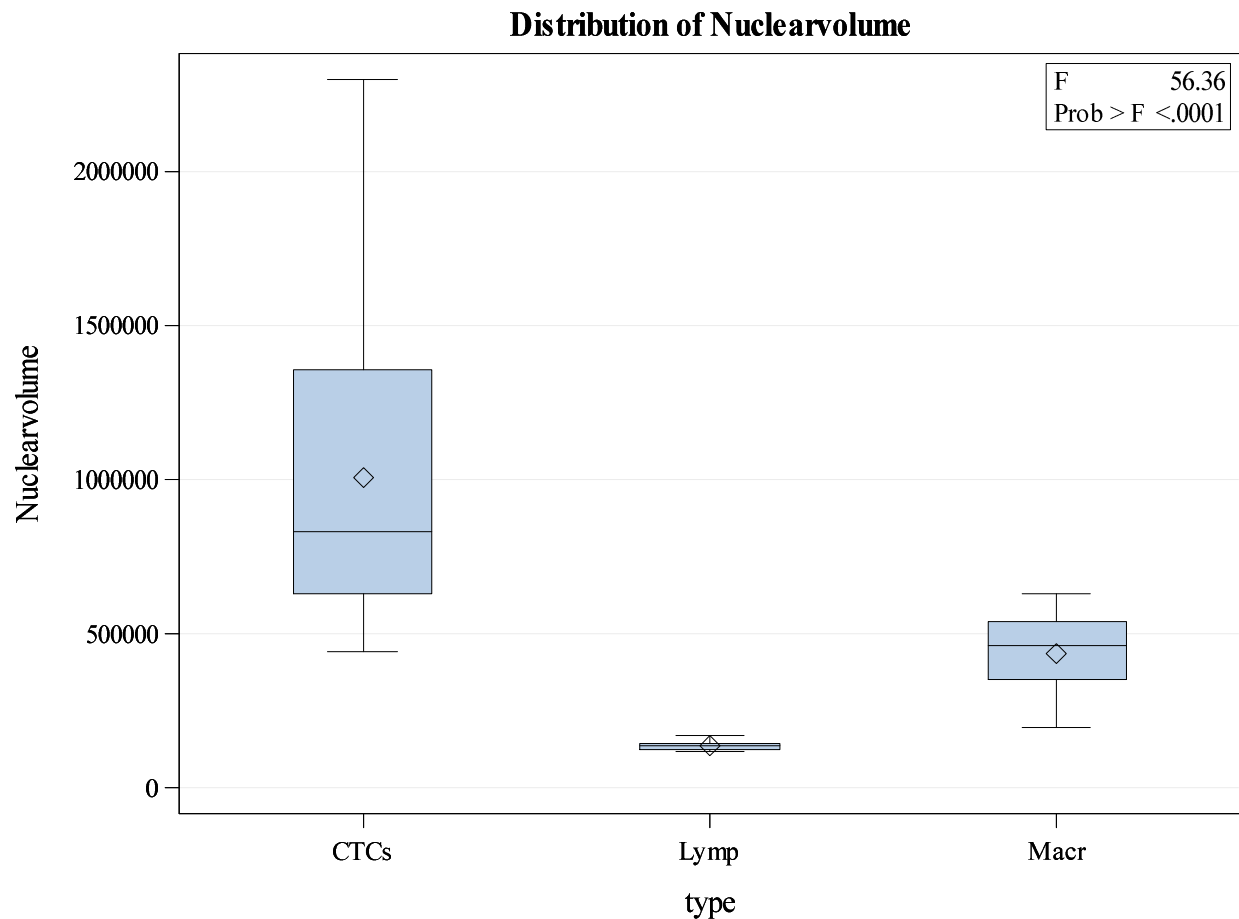

*The GLM Procedure**Dependent Variable: telomereperkv*

pt=17AA0828

| Source                 | DF | Sum of Squares | Mean Square | F Value | Pr > F |
|------------------------|----|----------------|-------------|---------|--------|
| <b>Model</b>           | 2  | 0.04971177     | 0.02485588  | 17.92   | <.0001 |
| <b>Error</b>           | 78 | 0.10818698     | 0.00138701  |         |        |
| <b>Corrected Total</b> | 80 | 0.15789875     |             |         |        |

| R-Square | Coeff Var | Root MSE | telomereperkv Mean |
|----------|-----------|----------|--------------------|
| 0.314833 | 28.62725  | 0.037243 | 0.130095           |

| Source      | DF | Type III SS | Mean Square | F Value | Pr > F |
|-------------|----|-------------|-------------|---------|--------|
| <b>type</b> | 2  | 0.04971177  | 0.02485588  | 17.92   | <.0001 |

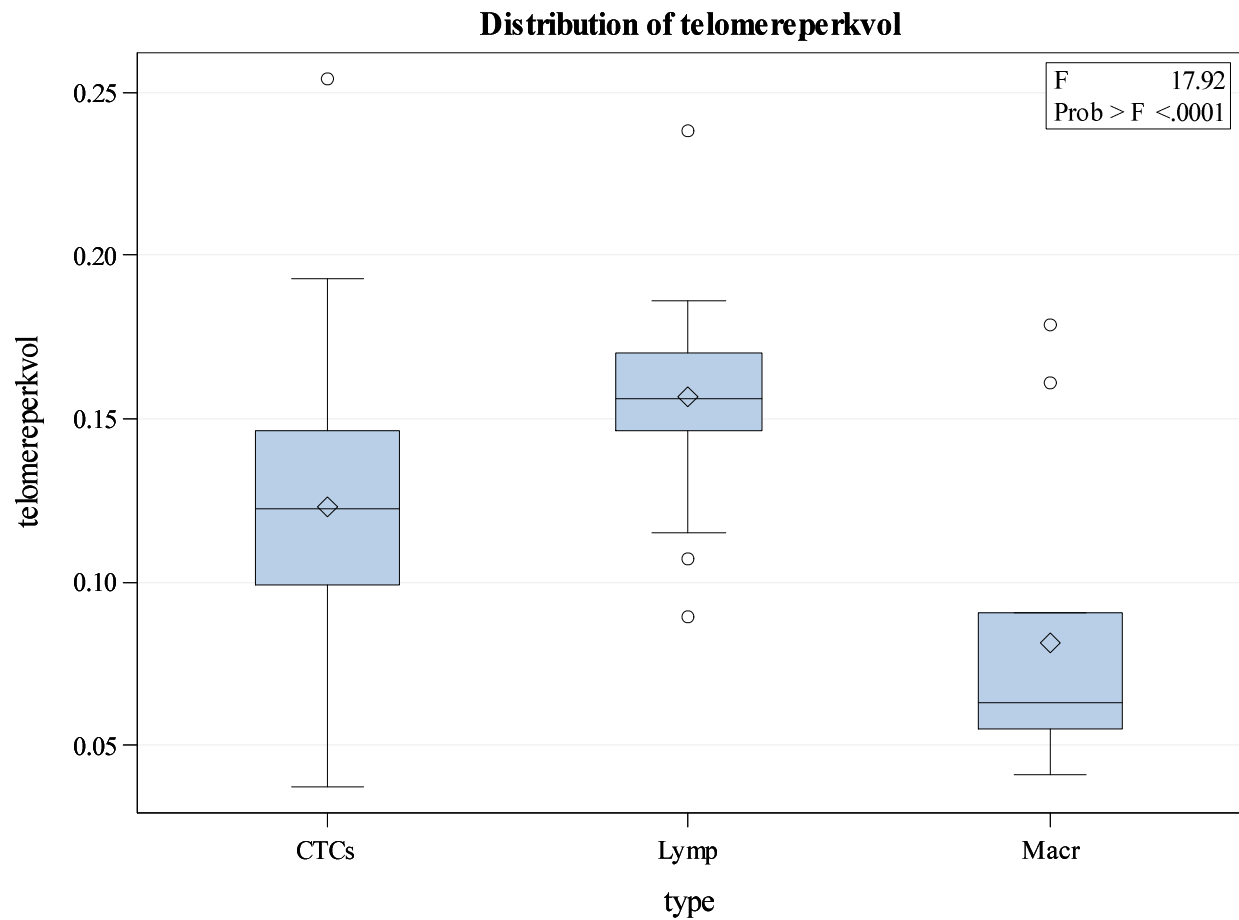

**The GLM Procedure**  
**Least Squares Means**

**pt=17AA0828**

| type | Totalnofsignals<br>LSMEAN | Standard<br>Error | Pr >  t | LSMEAN<br>Number |
|------|---------------------------|-------------------|---------|------------------|
| CTCs | 128.700000                | 8.925576          | <.0001  | 1                |
| Lymp | 21.666667                 | 10.306367         | 0.0388  | 2                |
| Macr | 32.363636                 | 17.020405         | 0.0609  | 3                |

| Least Squares Means for effect type<br>Pr >  t  for H0: LSMean(i)=LSMean(j) |        |        |        |
|-----------------------------------------------------------------------------|--------|--------|--------|
| Dependent Variable: Totalnofsignals                                         |        |        |        |
| i/j                                                                         | 1      | 2      | 3      |
| 1                                                                           |        | <.0001 | <.0001 |
| 2                                                                           | <.0001 |        | 0.5924 |
| 3                                                                           | <.0001 | 0.5924 |        |

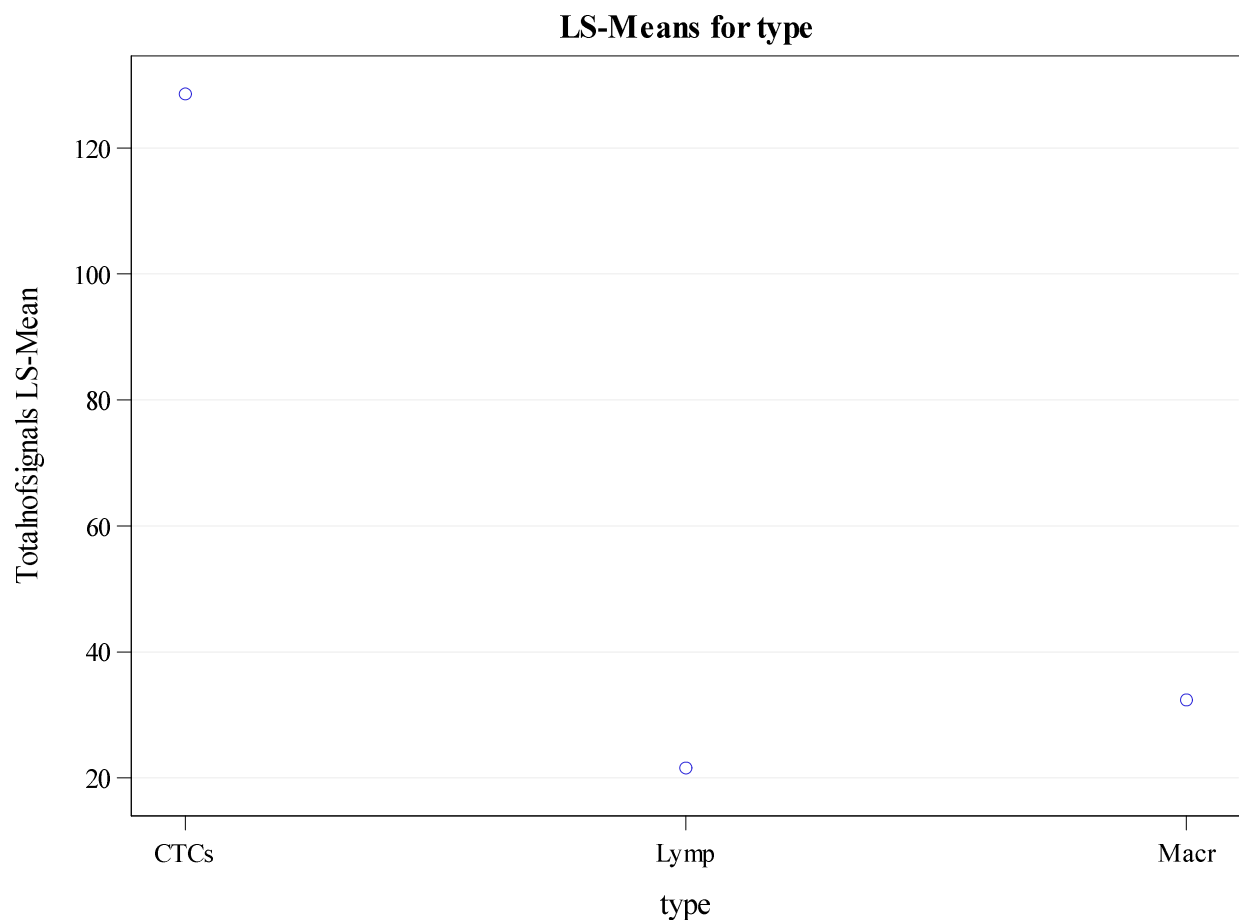

*The GLM Procedure*  
*Least Squares Means*

pt=17AA0828

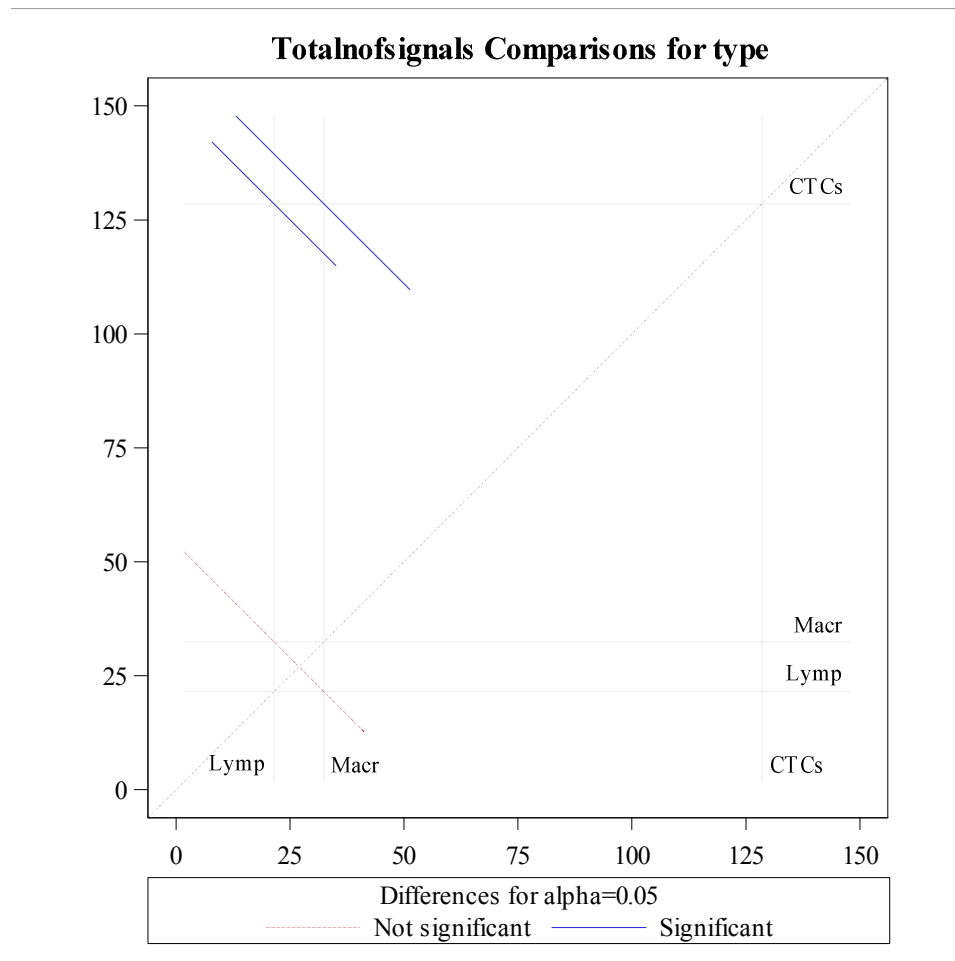

| type        | Totalnofaggregates<br>LSMEAN | Standard<br>Error | Pr >  t | LSMEAN<br>Number |
|-------------|------------------------------|-------------------|---------|------------------|
| <b>CTCs</b> | 16.3000000                   | 1.4996982         | <.0001  | 1                |
| <b>Lymp</b> | 1.7333333                    | 1.7317024         | 0.3200  | 2                |
| <b>Macr</b> | 2.9090909                    | 2.8598123         | 0.3122  | 3                |

***The GLM Procedure***  
***Least Squares Means***

pt=17AA0828

| Least Squares Means for effect type<br>Pr >  t  for H0: LSMean(i)=LSMean(j) |        |        |        |
|-----------------------------------------------------------------------------|--------|--------|--------|
| Dependent Variable: Totalnofaggregates                                      |        |        |        |
| i/j                                                                         | 1      | 2      | 3      |
| 1                                                                           |        | <.0001 | <.0001 |
| 2                                                                           | <.0001 |        | 0.7260 |
| 3                                                                           | <.0001 | 0.7260 |        |

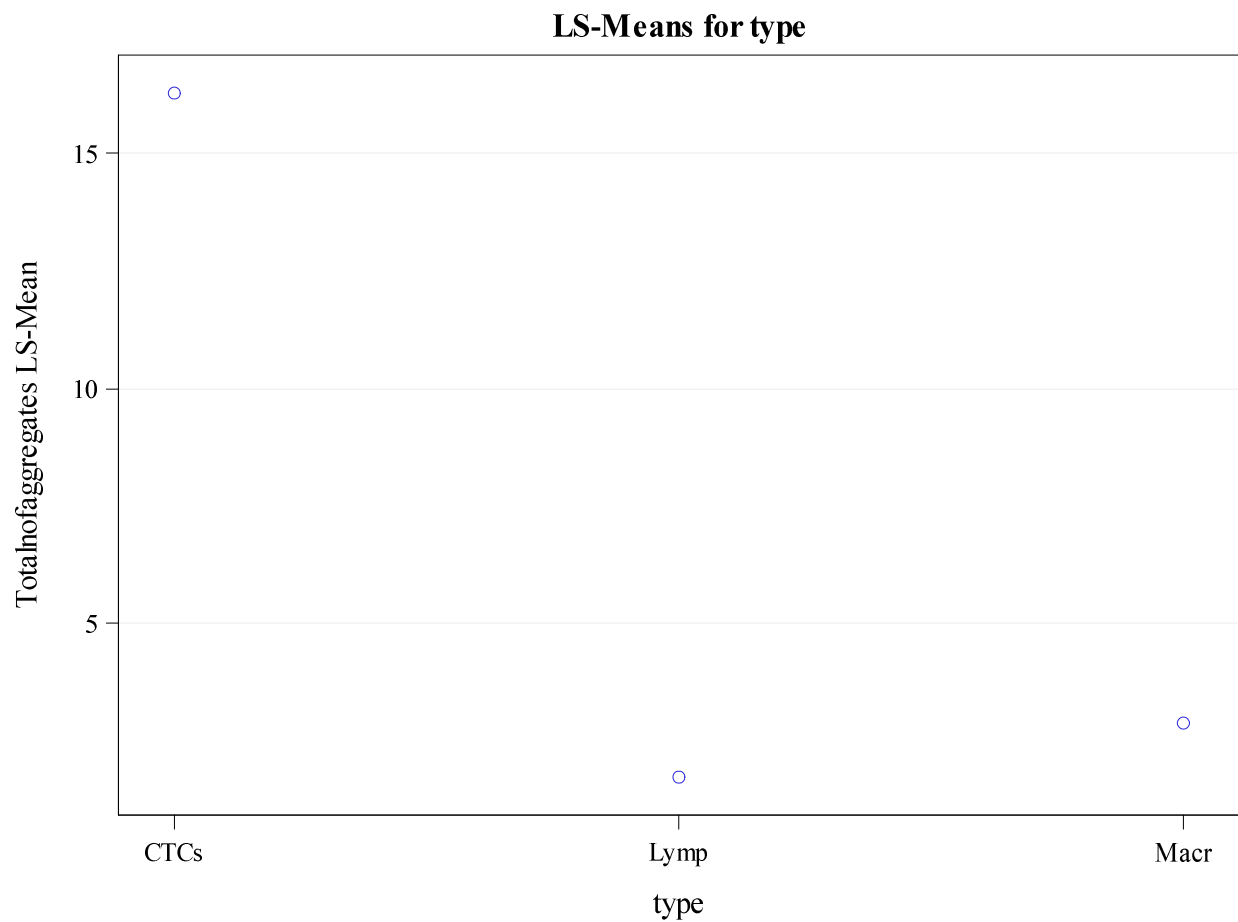

**The GLM Procedure**  
**Least Squares Means**

pt=17AA0828

**Totalnofaggregates Comparisons for type**

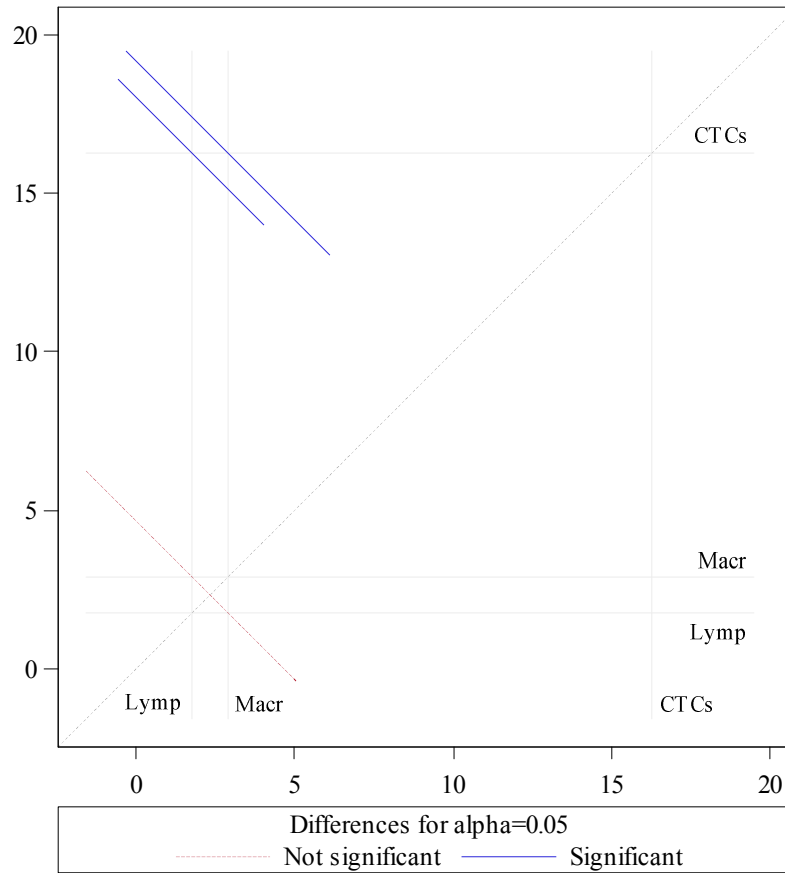

| type        | acratio<br>LSMEAN | Standard<br>Error | Pr >  t | LSMEAN<br>Number |
|-------------|-------------------|-------------------|---------|------------------|
| <b>CTCs</b> | 3.25167320        | 0.16499169        | <.0001  | 1                |
| <b>Lymp</b> | 1.38709094        | 0.19051599        | <.0001  | 2                |
| <b>Macr</b> | 3.39148334        | 0.31462680        | <.0001  | 3                |

| Least Squares Means for effect type<br>Pr >  t  for H0: LSMean(i)=LSMean(j) |        |        |        |
|-----------------------------------------------------------------------------|--------|--------|--------|
| Dependent Variable: acratio                                                 |        |        |        |
| i/j                                                                         | 1      | 2      | 3      |
| 1                                                                           |        | <.0001 | 0.6950 |
| 2                                                                           | <.0001 |        | <.0001 |
| 3                                                                           | 0.6950 | <.0001 |        |

*The GLM Procedure*  
*Least Squares Means*

pt=17AA0828

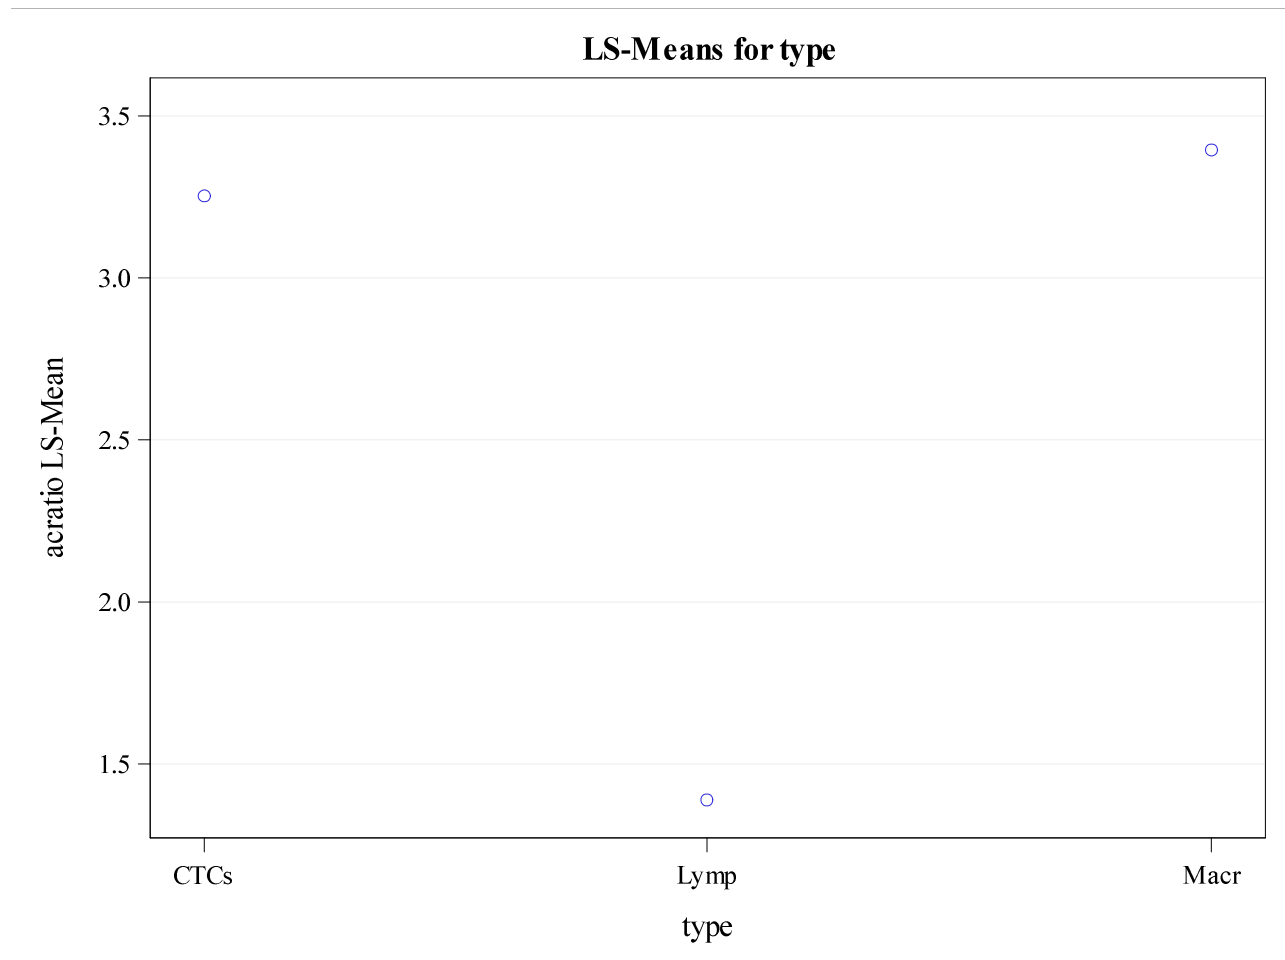

***The GLM Procedure***  
***Least Squares Means***

**pt=17AA0828**

**acratio Comparisons for type**

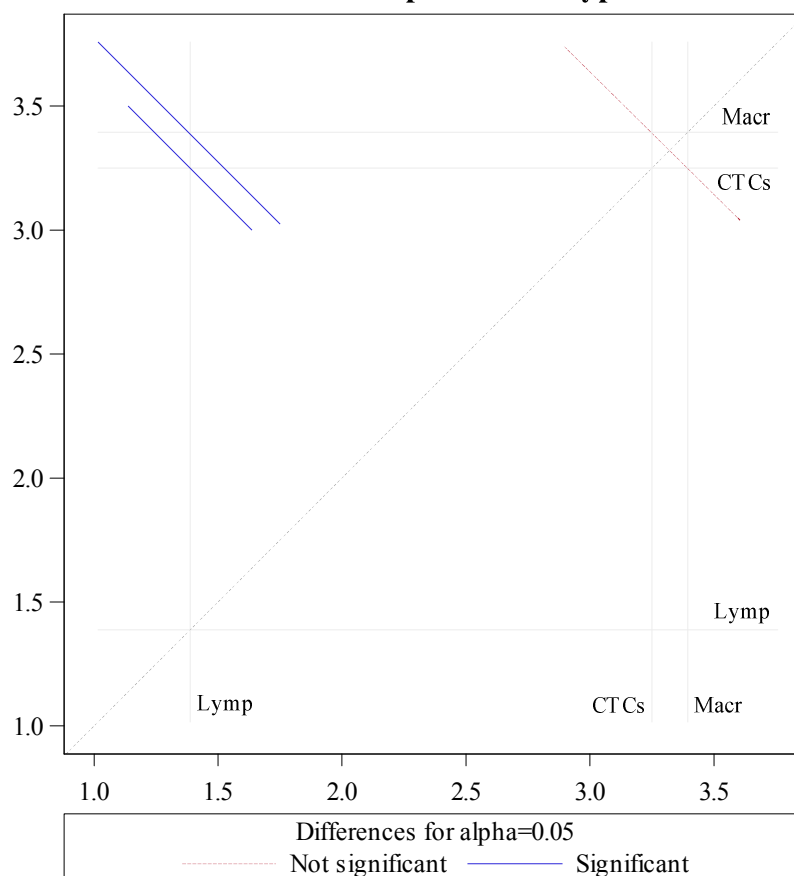

| type        | AvIntallsignals<br>LSMEAN | Standard<br>Error | Pr >  t | LSMEAN<br>Number |
|-------------|---------------------------|-------------------|---------|------------------|
| <b>CTCs</b> | 9647.5311                 | 702.0461          | <.0001  | 1                |
| <b>Lymp</b> | 28679.0768                | 810.6530          | <.0001  | 2                |
| <b>Macr</b> | 11597.5979                | 1338.7493         | <.0001  | 3                |

| Least Squares Means for effect type<br>Pr >  t  for H0: LSMean(i)=LSMean(j) |        |        |        |
|-----------------------------------------------------------------------------|--------|--------|--------|
| Dependent Variable: AvIntallsignals                                         |        |        |        |
| i/j                                                                         | 1      | 2      | 3      |
| 1                                                                           |        | <.0001 | 0.2009 |
| 2                                                                           | <.0001 |        | <.0001 |
| 3                                                                           | 0.2009 | <.0001 |        |



*The GLM Procedure*  
*Least Squares Means*

pt=17AA0828

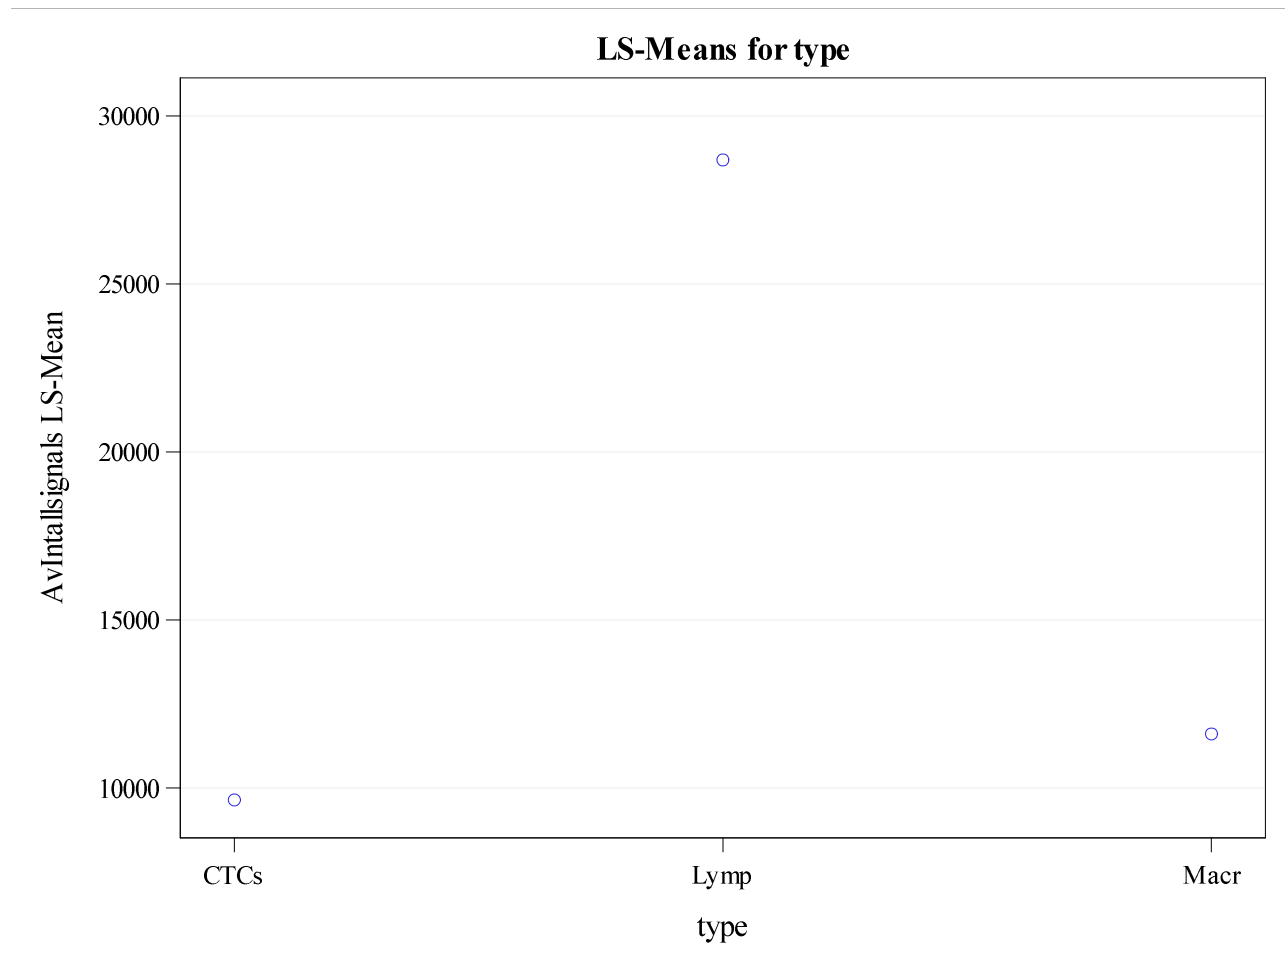

**The GLM Procedure**  
**Least Squares Means**

pt=17AA0828

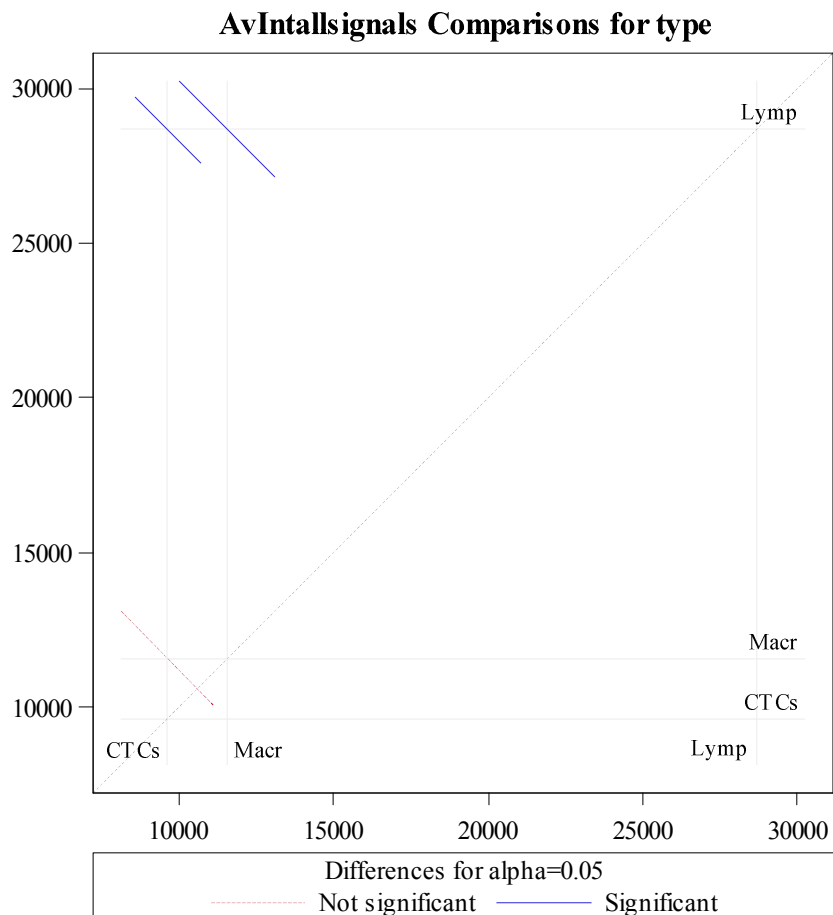

| type        | Totalintensity<br>LSMEAN | Standard<br>Error | Pr >  t | LSMEAN<br>Number |
|-------------|--------------------------|-------------------|---------|------------------|
| <b>CTCs</b> | 1217496.18               | 82682.75          | <.0001  | 1                |
| <b>Lymp</b> | 609881.10                | 95473.82          | <.0001  | 2                |
| <b>Macr</b> | 363543.00                | 157669.82         | 0.0238  | 3                |

| Least Squares Means for effect type<br>Pr >  t  for H0: LSMean(i)=LSMean(j) |        |        |        |
|-----------------------------------------------------------------------------|--------|--------|--------|
| Dependent Variable: Totalintensity                                          |        |        |        |
| i/j                                                                         | 1      | 2      | 3      |
| 1                                                                           |        | <.0001 | <.0001 |
| 2                                                                           | <.0001 |        | 0.1853 |
| 3                                                                           | <.0001 | 0.1853 |        |

*The GLM Procedure*  
*Least Squares Means*

pt=17AA0828

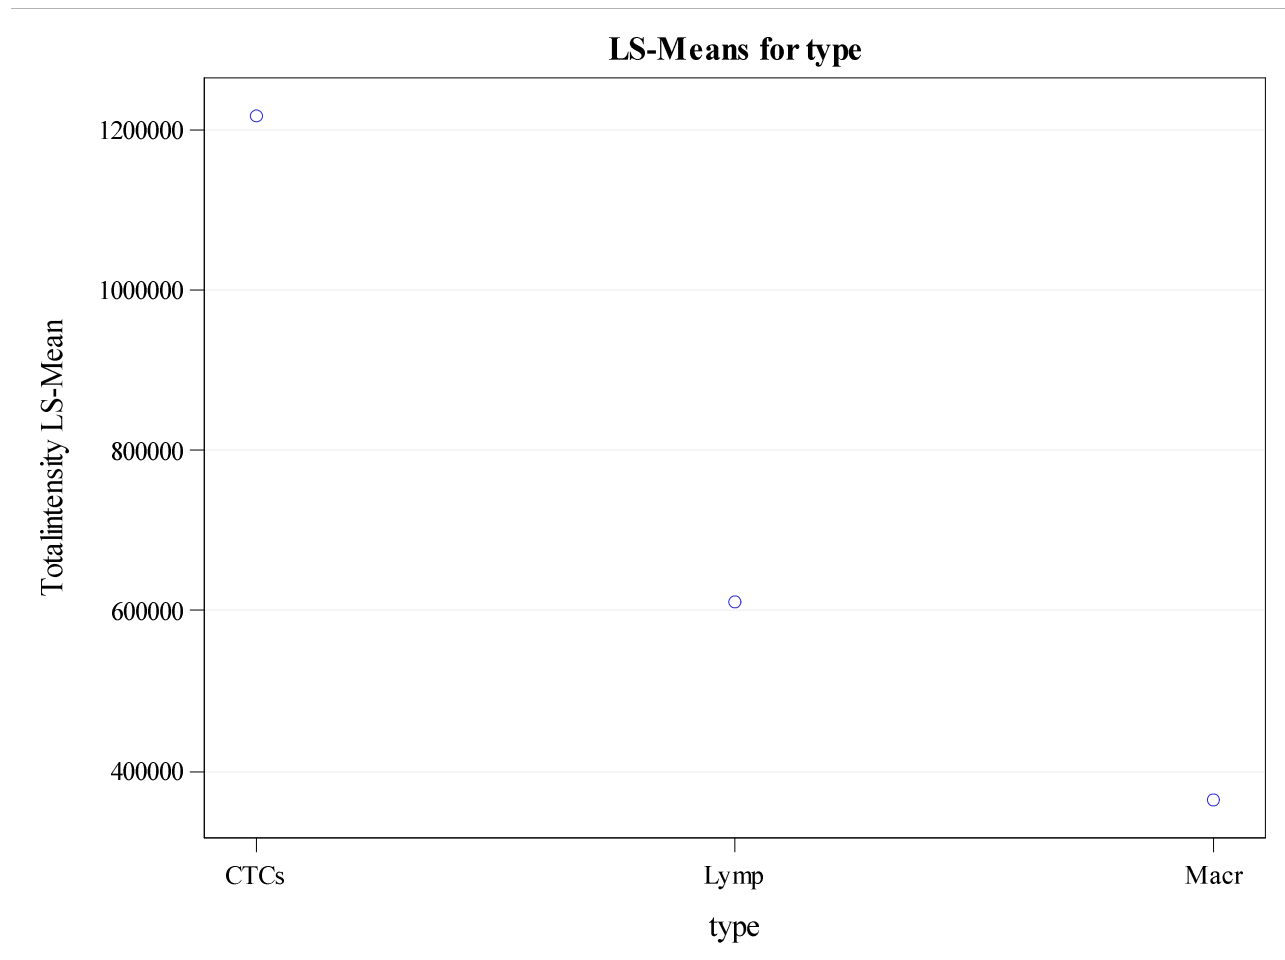

***The GLM Procedure***  
***Least Squares Means***

**pt=17AA0828**

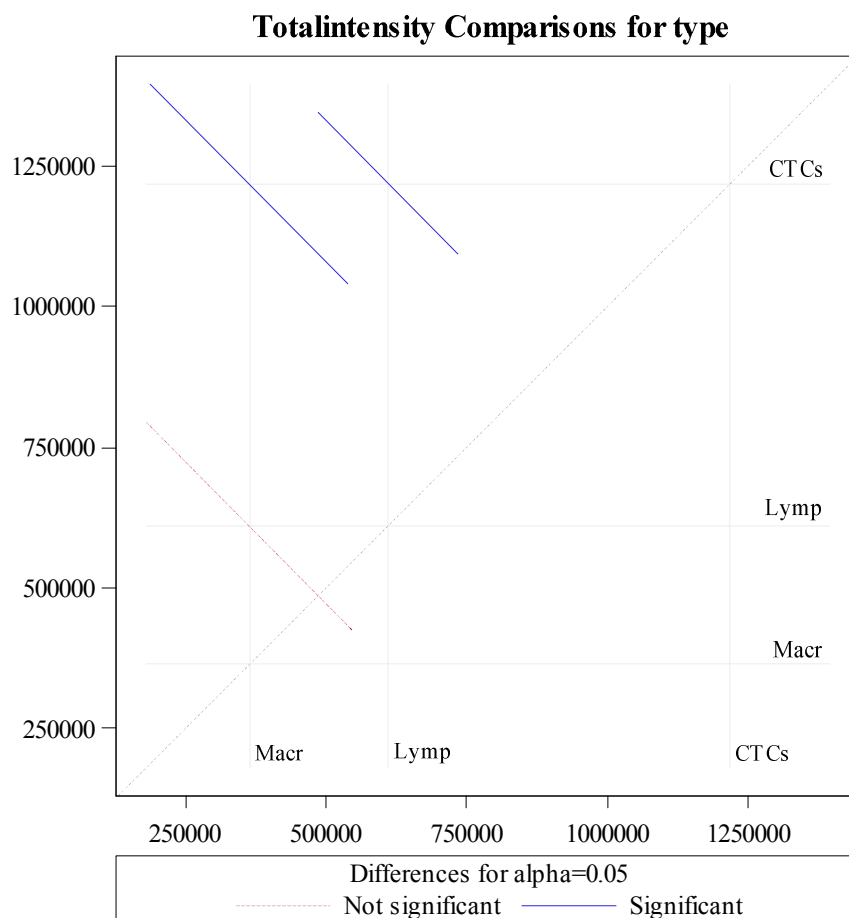

| type         | Nuclearvolume<br>LSMEAN | Standard<br>Error | Pr >  t | LSMEAN<br>Number |
|--------------|-------------------------|-------------------|---------|------------------|
| <b>CTCs</b>  | 1004742.90              | 54195.89          | <.0001  | 1                |
| <b>Lymph</b> | 138459.67               | 62580.02          | 0.0299  | 2                |
| <b>Macr</b>  | 434030.09               | 103347.50         | <.0001  | 3                |

| Least Squares Means for effect type<br>Pr >  t  for H0: LSMean(i)=LSMean(j) |        |        |        |
|-----------------------------------------------------------------------------|--------|--------|--------|
| Dependent Variable: Nuclearvolume                                           |        |        |        |
| i/j                                                                         | 1      | 2      | 3      |
| 1                                                                           |        | <.0001 | <.0001 |
| 2                                                                           | <.0001 |        | 0.0167 |
| 3                                                                           | <.0001 | 0.0167 |        |

*The GLM Procedure*  
*Least Squares Means*

pt=17AA0828

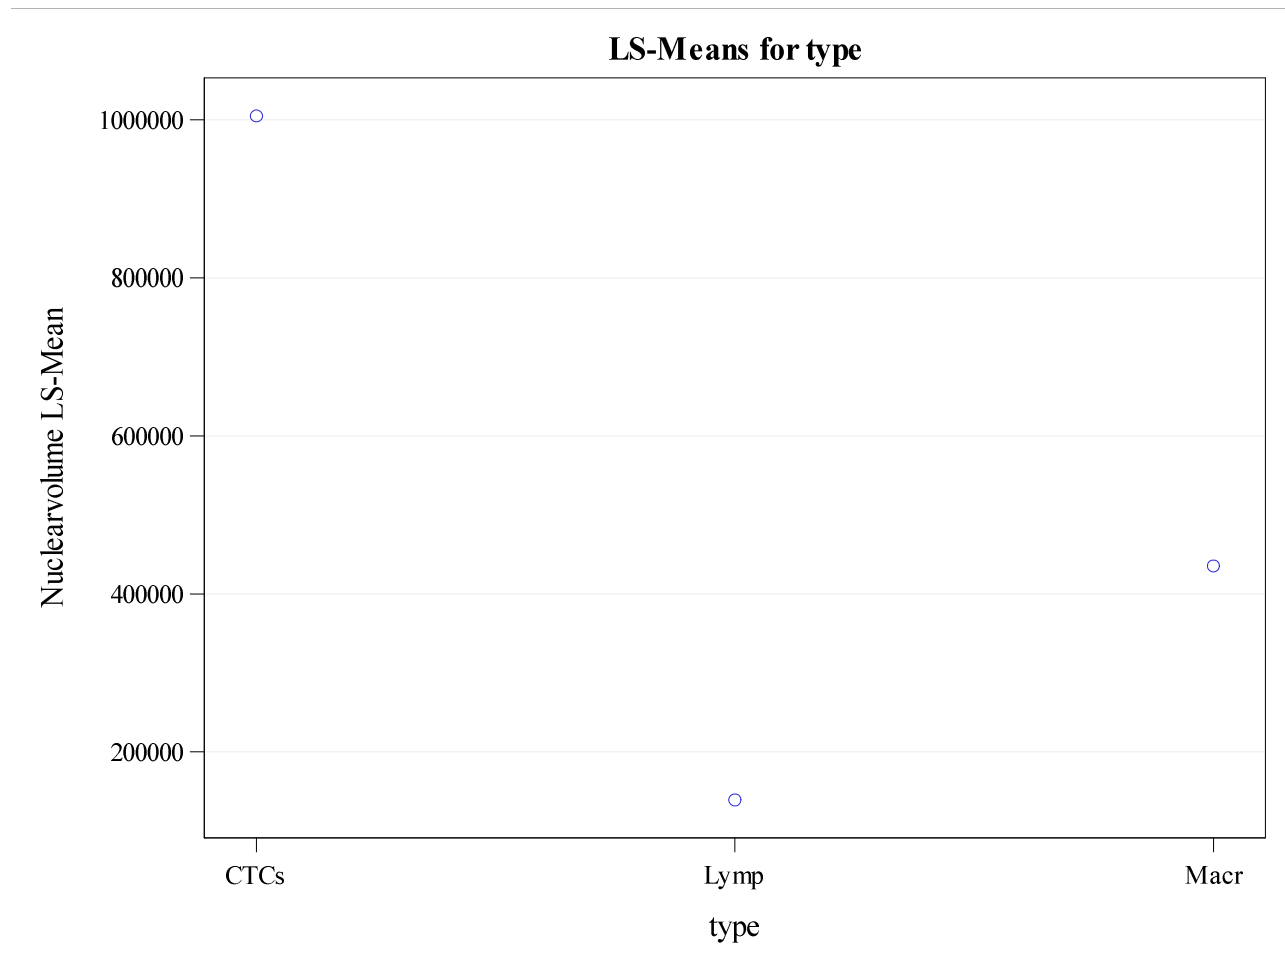

***The GLM Procedure***  
***Least Squares Means***

**pt=17AA0828**

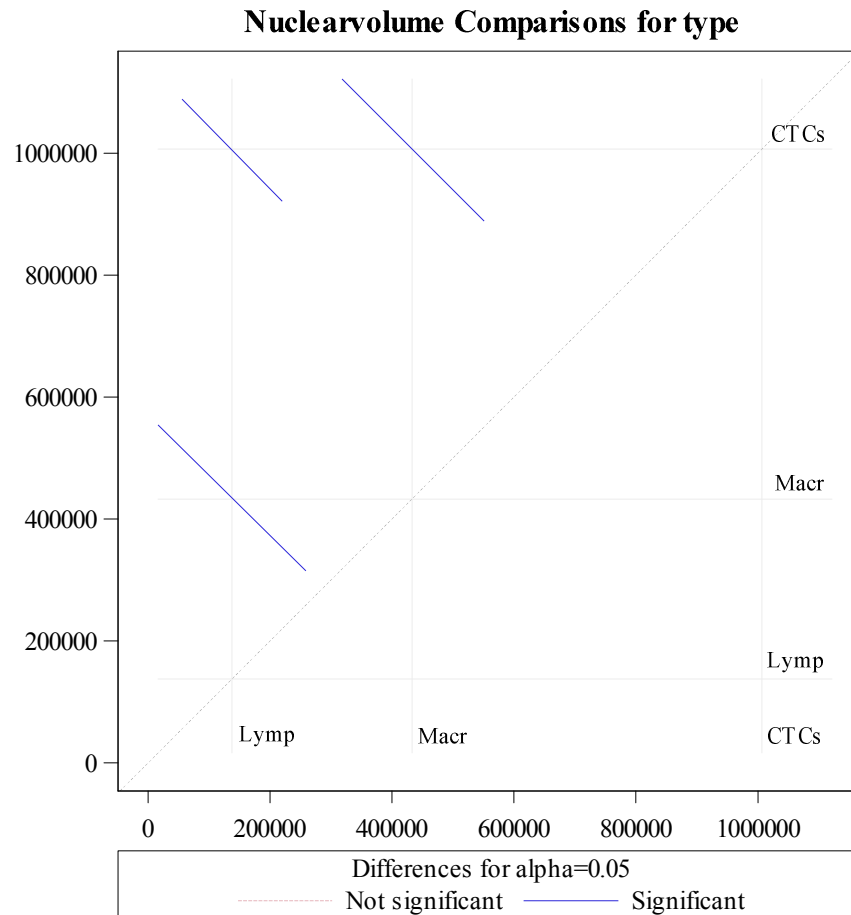

| type         | telomereperkv<br>LSMEAN | Standard<br>Error | Pr >  t | LSMEAN<br>Number |
|--------------|-------------------------|-------------------|---------|------------------|
| <b>CTCs</b>  | 0.12329236              | 0.00588857        | <.0001  | 1                |
| <b>Lymph</b> | 0.15702634              | 0.00679954        | <.0001  | 2                |
| <b>Macr</b>  | 0.08138265              | 0.01122907        | <.0001  | 3                |

| Least Squares Means for effect type<br>Pr >  t  for H0: LSMean(i)=LSMean(j) |        |        |        |
|-----------------------------------------------------------------------------|--------|--------|--------|
| Dependent Variable: telomereperkv                                           |        |        |        |
| i/j                                                                         | 1      | 2      | 3      |
| 1                                                                           |        | 0.0003 | 0.0014 |
| 2                                                                           | 0.0003 |        | <.0001 |
| 3                                                                           | 0.0014 | <.0001 |        |

*The GLM Procedure*  
*Least Squares Means*

pt=17AA0828

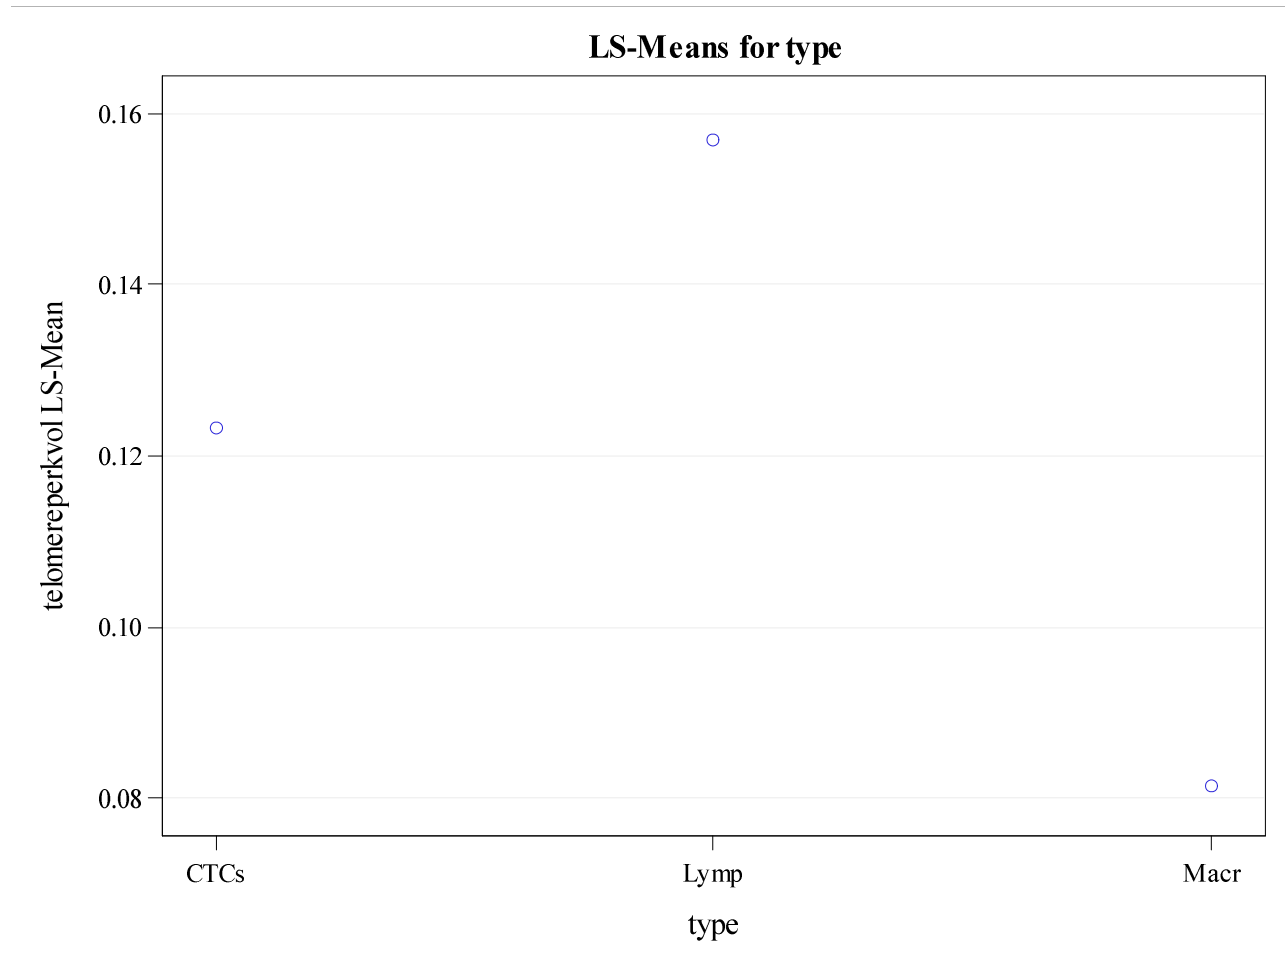

*The GLM Procedure*  
*Least Squares Means*

pt=17AA0828

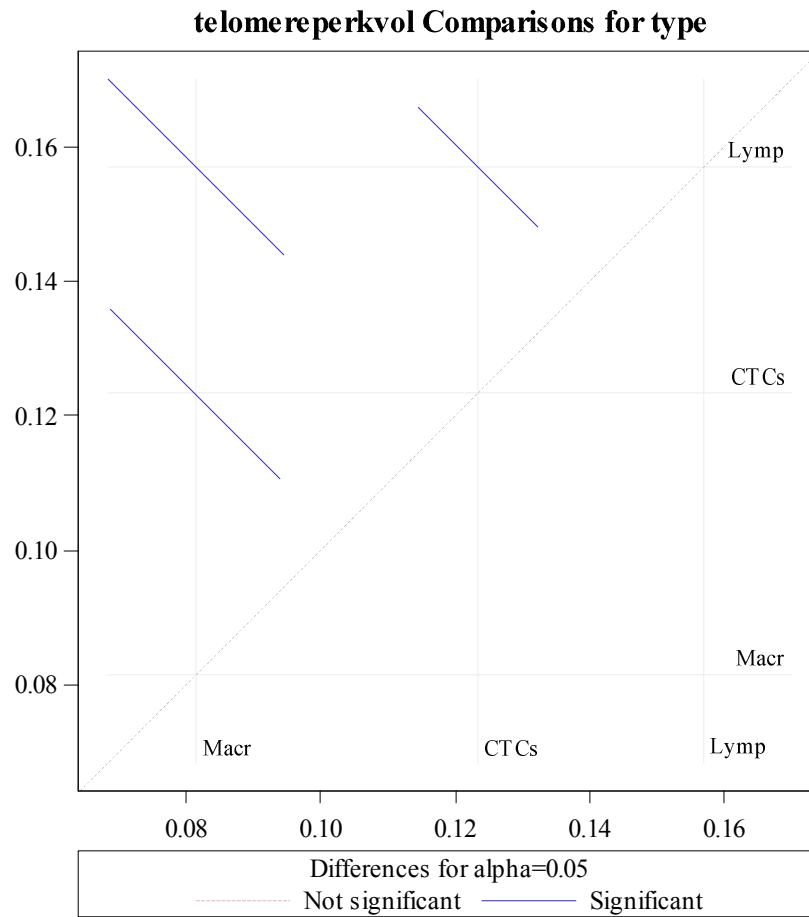

**Note:** To ensure overall protection level, only probabilities associated with pre-planned comparisons should be used.



*The GLM Procedure*

pt=17AA0845

| Class Level Information |        |                 |
|-------------------------|--------|-----------------|
| Class                   | Levels | Values          |
| type                    | 3      | CTCs Lymph Macr |

|                             |    |
|-----------------------------|----|
| Number of Observations Read | 53 |
| Number of Observations Used | 53 |

**The GLM Procedure**

**Dependent Variable: Totalnofsignals**  
**Totalnofsignals**

**pt=17AA0845**

| Source                 | DF | Sum of Squares | Mean Square | F Value | Pr > F |
|------------------------|----|----------------|-------------|---------|--------|
| <b>Model</b>           | 2  | 247113.0529    | 123556.5264 | 12.20   | <.0001 |
| <b>Error</b>           | 50 | 506578.6452    | 10131.5729  |         |        |
| <b>Corrected Total</b> | 52 | 753691.6981    |             |         |        |

| R-Square | Coeff Var | Root MSE | Totalnofsignals Mean |
|----------|-----------|----------|----------------------|
| 0.327870 | 145.7185  | 100.6557 | 69.07547             |

| Source      | DF | Type III SS | Mean Square | F Value | Pr > F |
|-------------|----|-------------|-------------|---------|--------|
| <b>type</b> | 2  | 247113.0529 | 123556.5264 | 12.20   | <.0001 |

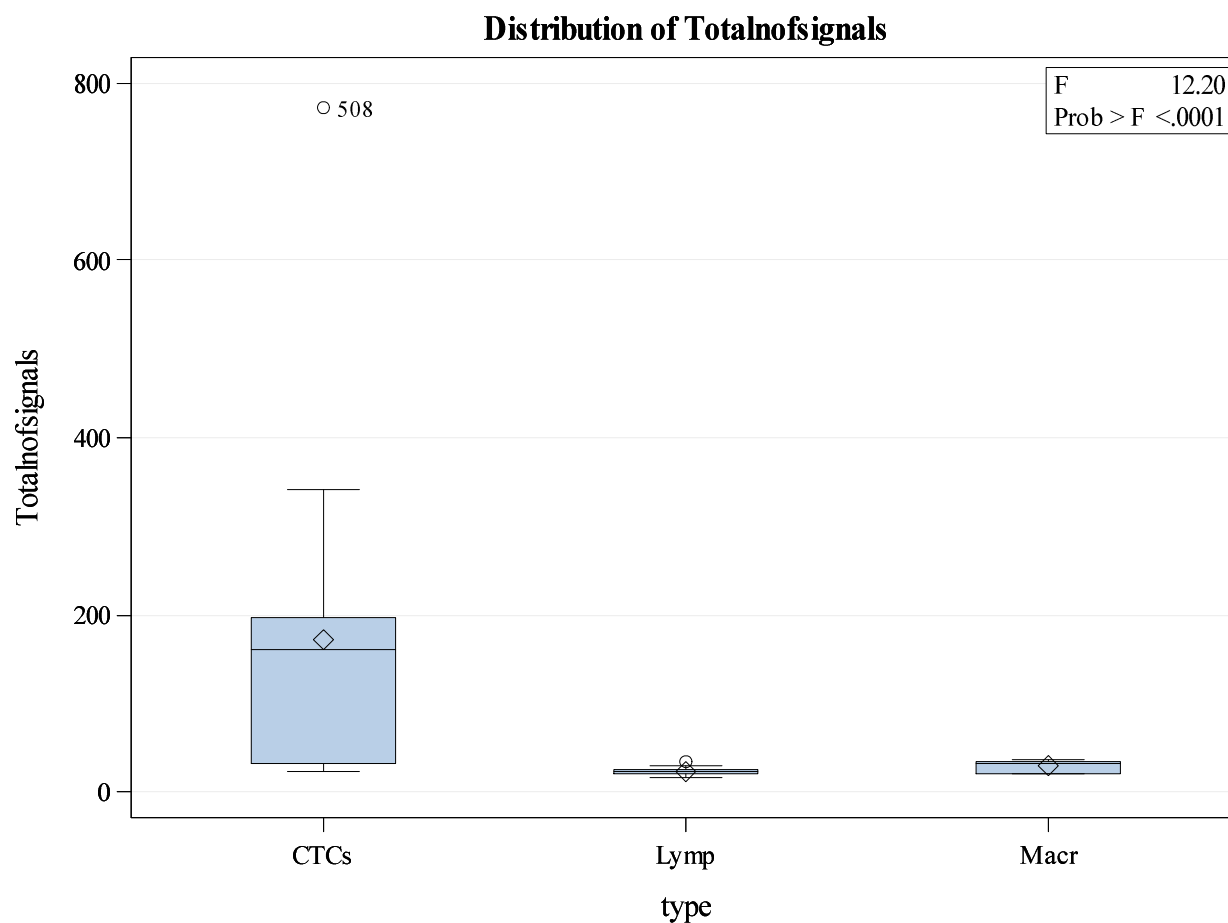

*The GLM Procedure***Dependent Variable: Totalnofaggregates Totalnofaggregates****pt=17AA0845**

| Source                 | DF | Sum of Squares | Mean Square | F Value | Pr > F |
|------------------------|----|----------------|-------------|---------|--------|
| <b>Model</b>           | 2  | 3612.23684     | 1806.11842  | 11.63   | <.0001 |
| <b>Error</b>           | 50 | 7762.89524     | 155.25790   |         |        |
| <b>Corrected Total</b> | 52 | 11375.13208    |             |         |        |

| R-Square | Coeff Var | Root MSE | Totalnofaggregates Mean |
|----------|-----------|----------|-------------------------|
| 0.317556 | 167.1882  | 12.46025 | 7.452830                |

| Source      | DF | Type III SS | Mean Square | F Value | Pr > F |
|-------------|----|-------------|-------------|---------|--------|
| <b>type</b> | 2  | 3612.236837 | 1806.118419 | 11.63   | <.0001 |

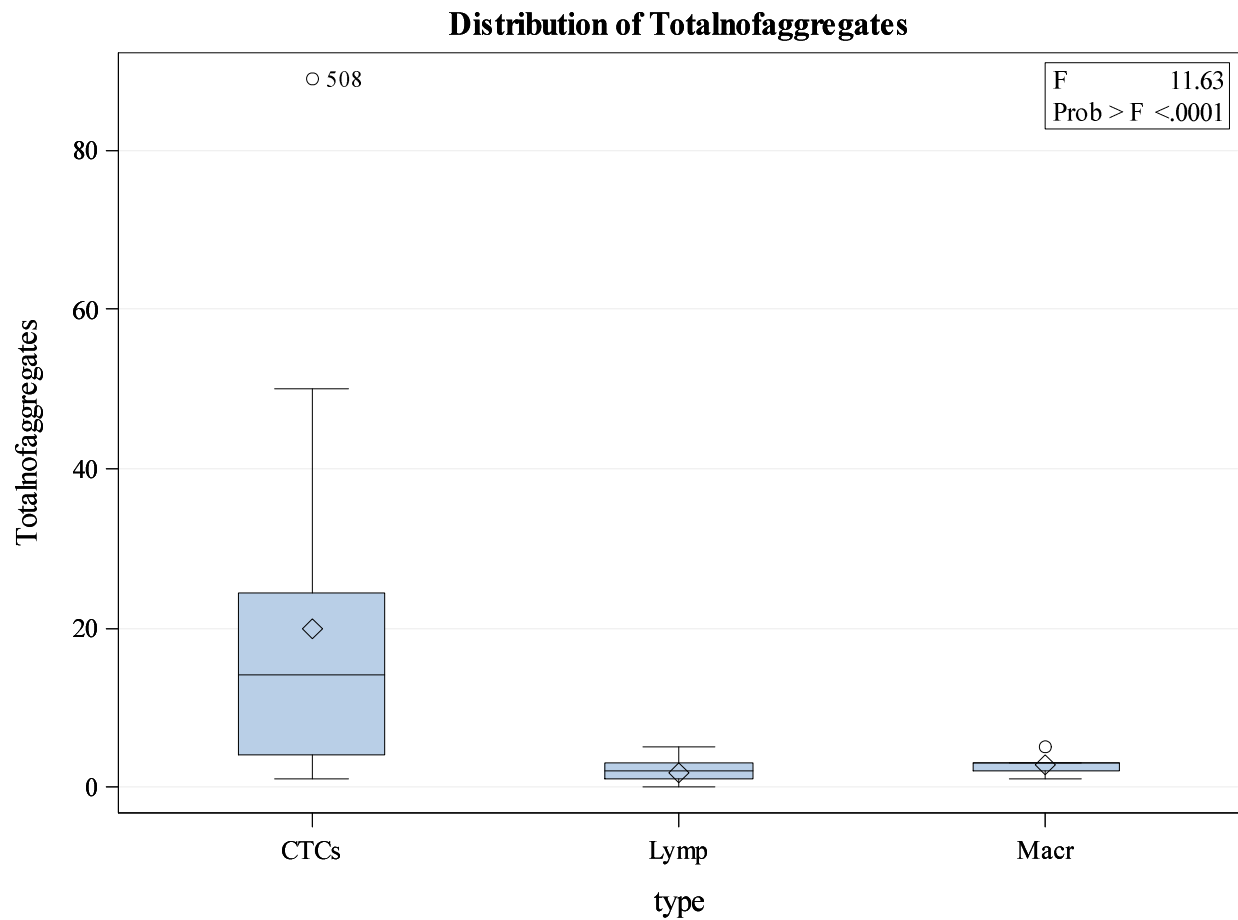

**The GLM Procedure**

**Dependent Variable: acratio**  
**acratio**

**pt=17AA0845**

| Source                 | DF | Sum of Squares | Mean Square | F Value | Pr > F |
|------------------------|----|----------------|-------------|---------|--------|
| <b>Model</b>           | 2  | 133.6529888    | 66.8264944  | 44.05   | <.0001 |
| <b>Error</b>           | 50 | 75.8520106     | 1.5170402   |         |        |
| <b>Corrected Total</b> | 52 | 209.5049993    |             |         |        |

| R-Square | Coeff Var | Root MSE | acratio Mean |
|----------|-----------|----------|--------------|
| 0.637947 | 41.83030  | 1.231682 | 2.944473     |

| Source      | DF | Type III SS | Mean Square | F Value | Pr > F |
|-------------|----|-------------|-------------|---------|--------|
| <b>type</b> | 2  | 133.6529888 | 66.8264944  | 44.05   | <.0001 |

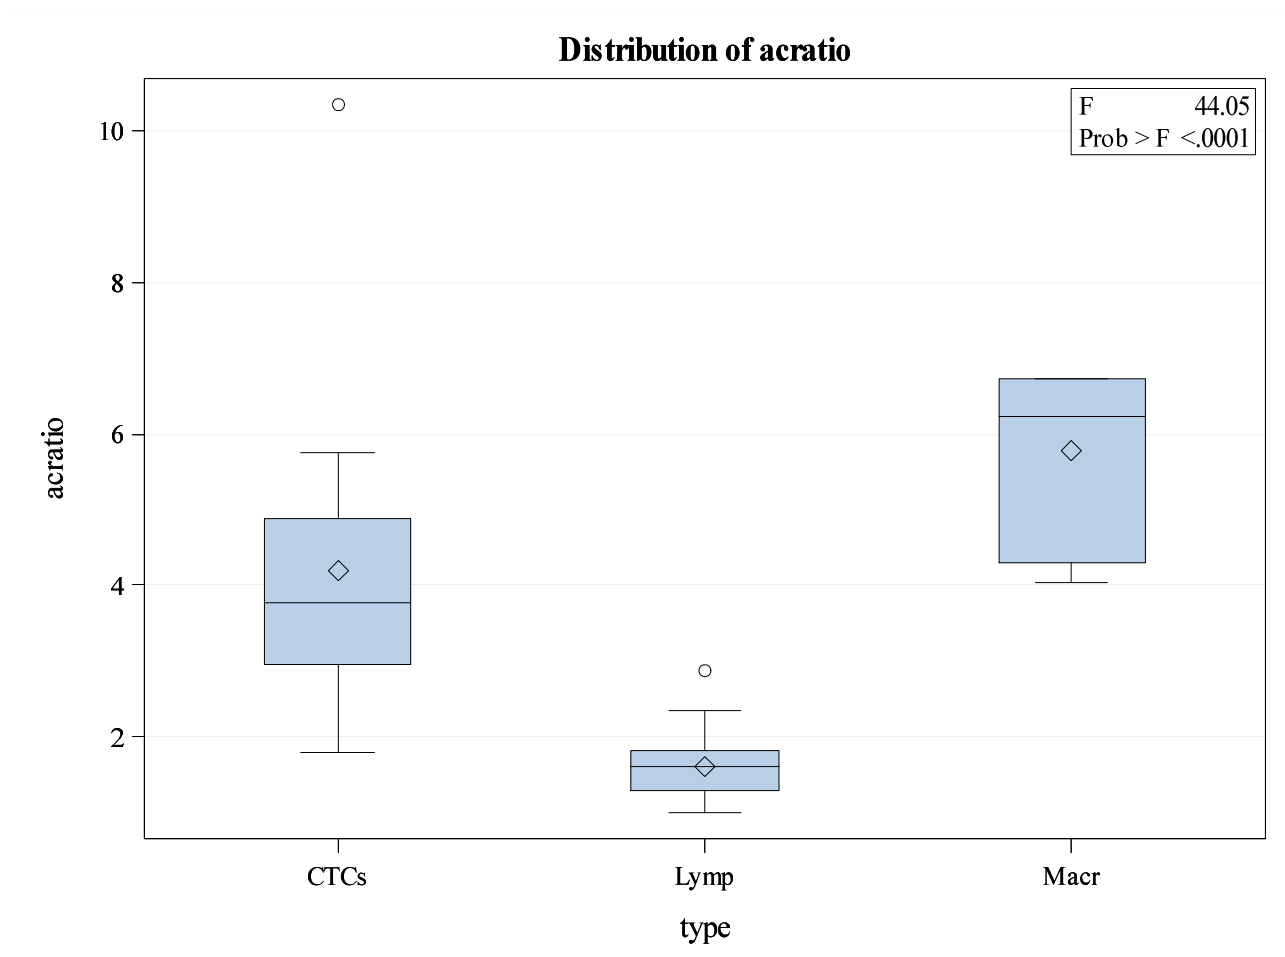

**The GLM Procedure**

**Dependent Variable: AvIntallsignals**  
**AvIntallsignals**

**pt=17AA0845**

| Source                 | DF | Sum of Squares | Mean Square | F Value | Pr > F |
|------------------------|----|----------------|-------------|---------|--------|
| <b>Model</b>           | 2  | 2241078628     | 1120539314  | 45.59   | <.0001 |
| <b>Error</b>           | 50 | 1228851983     | 24577040    |         |        |
| <b>Corrected Total</b> | 52 | 3469930611     |             |         |        |

| R-Square | Coeff Var | Root MSE | AvIntallsignals Mean |
|----------|-----------|----------|----------------------|
| 0.645857 | 24.45933  | 4957.524 | 20268.44             |

| Source      | DF | Type III SS | Mean Square | F Value | Pr > F |
|-------------|----|-------------|-------------|---------|--------|
| <b>type</b> | 2  | 2241078628  | 1120539314  | 45.59   | <.0001 |

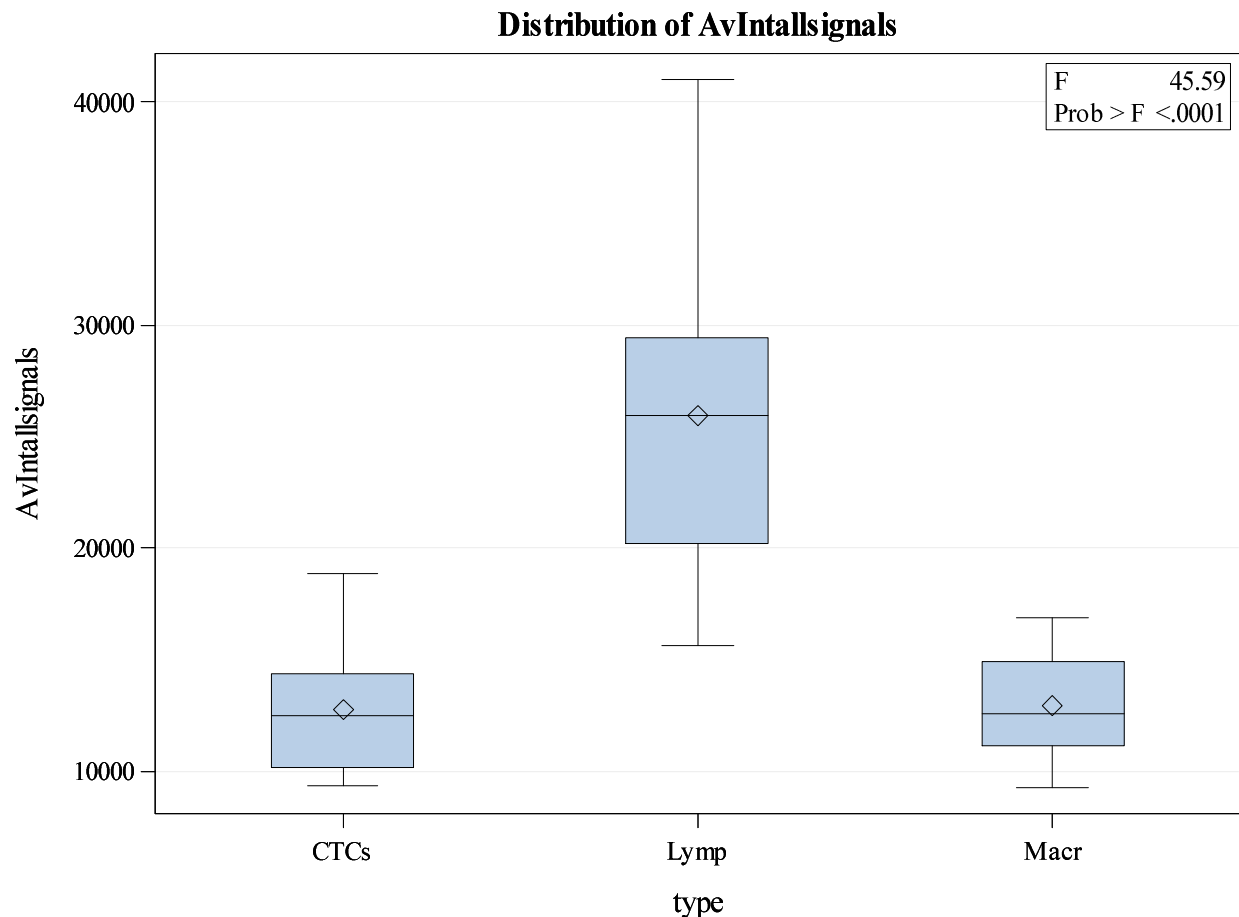

**The GLM Procedure**

**Dependent Variable: Totalintensity**  
**Totalintensity**

**pt=17AA0845**

| Source                 | DF | Sum of Squares | Mean Square  | F Value | Pr > F |
|------------------------|----|----------------|--------------|---------|--------|
| <b>Model</b>           | 2  | 2.2718622E13   | 1.1359311E13 | 9.24    | 0.0004 |
| <b>Error</b>           | 50 | 6.1476912E13   | 1.2295382E12 |         |        |
| <b>Corrected Total</b> | 52 | 8.4195534E13   |              |         |        |

| R-Square | Coeff Var | Root MSE | Totalintensity Mean |
|----------|-----------|----------|---------------------|
| 0.269832 | 112.9075  | 1108845  | 982083.4            |

| Source      | DF | Type III SS  | Mean Square  | F Value | Pr > F |
|-------------|----|--------------|--------------|---------|--------|
| <b>type</b> | 2  | 2.2718622E13 | 1.1359311E13 | 9.24    | 0.0004 |

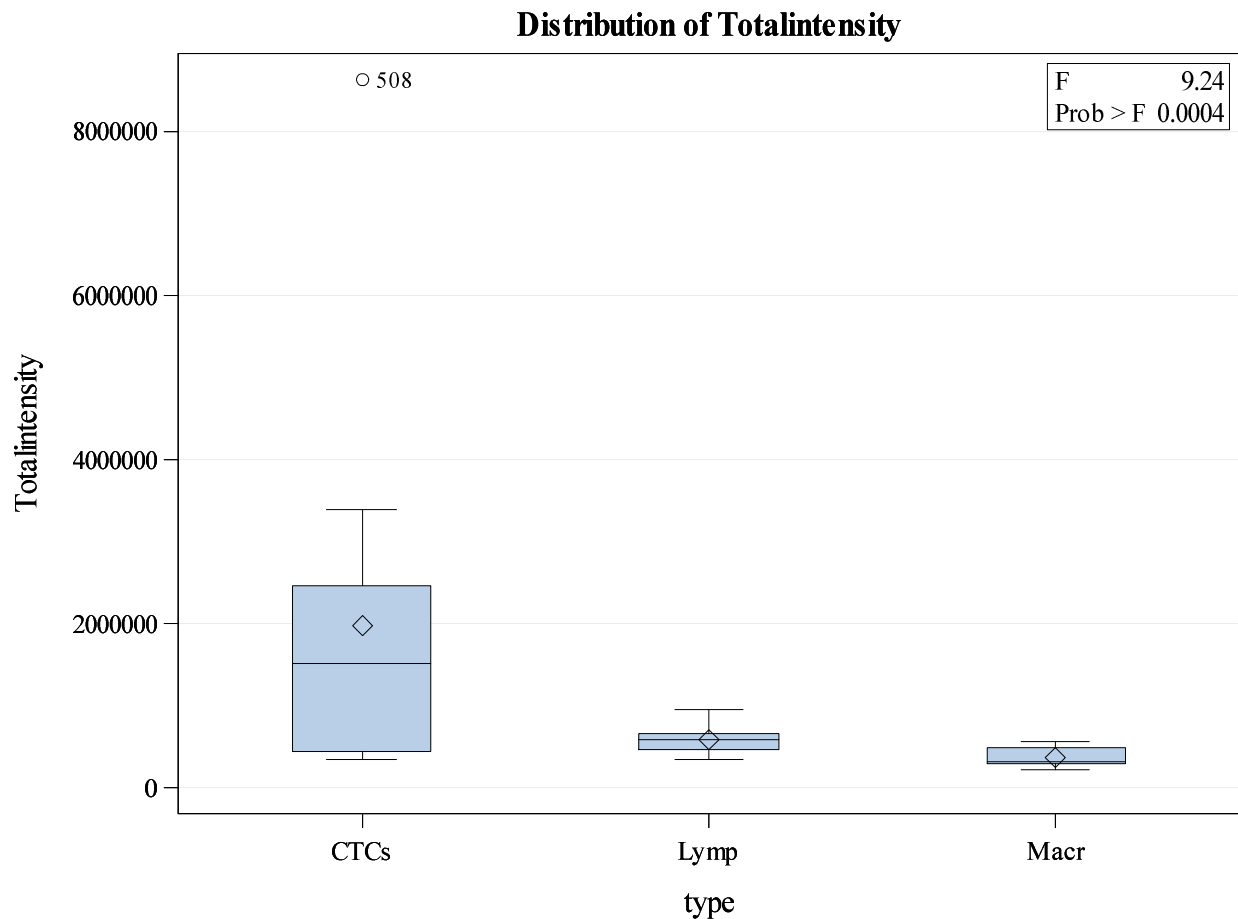

**The GLM Procedure**

**Dependent Variable: Nuclearvolume**  
**Nuclearvolume**

pt=17AA0845

| Source                 | DF | Sum of Squares | Mean Square  | F Value | Pr > F |
|------------------------|----|----------------|--------------|---------|--------|
| <b>Model</b>           | 2  | 1.4815672E13   | 7.4078358E12 | 21.07   | <.0001 |
| <b>Error</b>           | 50 | 1.7579489E13   | 351589777355 |         |        |
| <b>Corrected Total</b> | 52 | 3.2395161E13   |              |         |        |

| R-Square | Coeff Var | Root MSE | Nuclearvolume Mean |
|----------|-----------|----------|--------------------|
| 0.457342 | 108.0104  | 592950.1 | 548975.0           |

| Source      | DF | Type III SS  | Mean Square  | F Value | Pr > F |
|-------------|----|--------------|--------------|---------|--------|
| <b>type</b> | 2  | 1.4815672E13 | 7.4078358E12 | 21.07   | <.0001 |

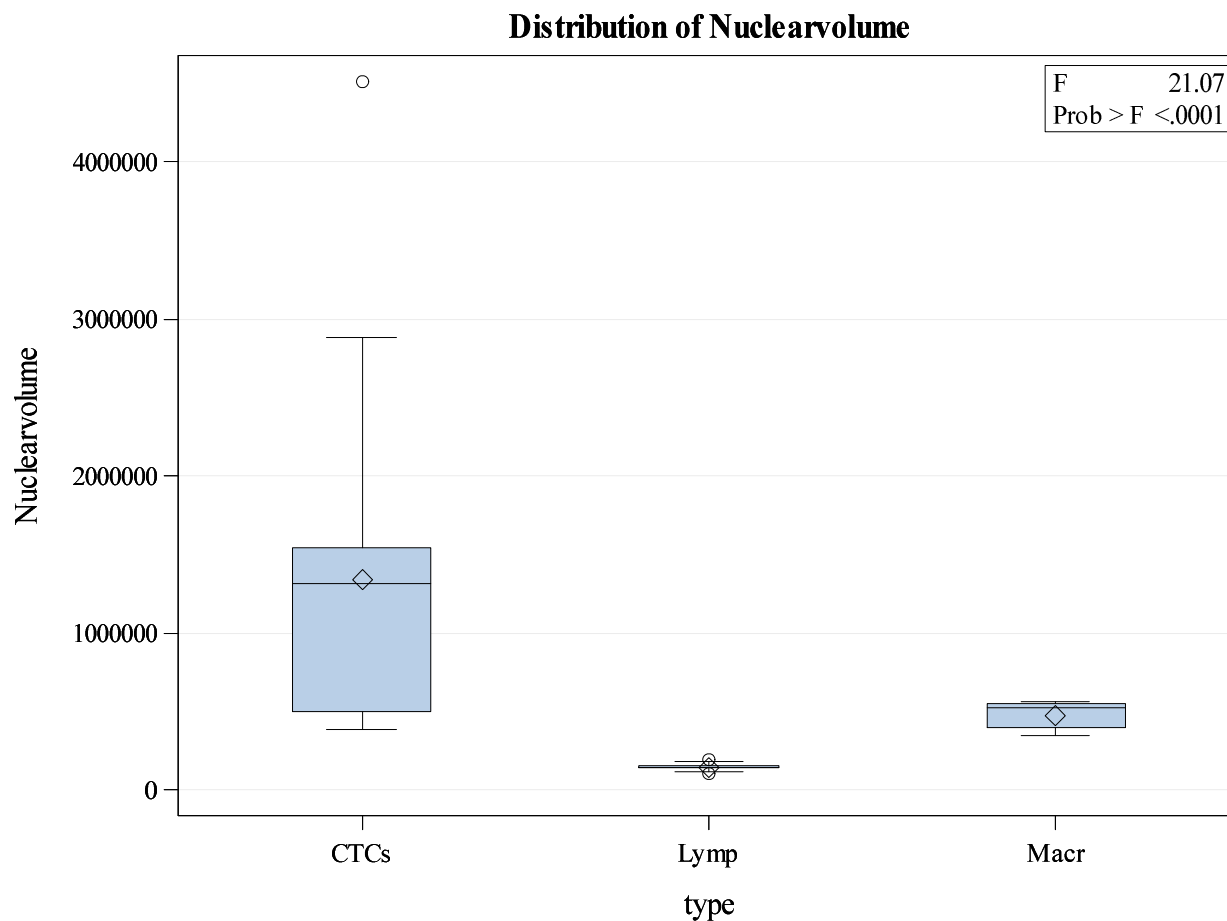

**The GLM Procedure****Dependent Variable: telomereperkvol****pt=17AA0845**

| Source                 | DF | Sum of Squares | Mean Square | F Value | Pr > F |
|------------------------|----|----------------|-------------|---------|--------|
| <b>Model</b>           | 2  | 0.06441565     | 0.03220782  | 29.25   | <.0001 |
| <b>Error</b>           | 50 | 0.05506254     | 0.00110125  |         |        |
| <b>Corrected Total</b> | 52 | 0.11947819     |             |         |        |

| R-Square | Coeff Var | Root MSE | telomereperkvol Mean |
|----------|-----------|----------|----------------------|
| 0.539141 | 24.98575  | 0.033185 | 0.132816             |

| Source      | DF | Type III SS | Mean Square | F Value | Pr > F |
|-------------|----|-------------|-------------|---------|--------|
| <b>type</b> | 2  | 0.06441565  | 0.03220782  | 29.25   | <.0001 |

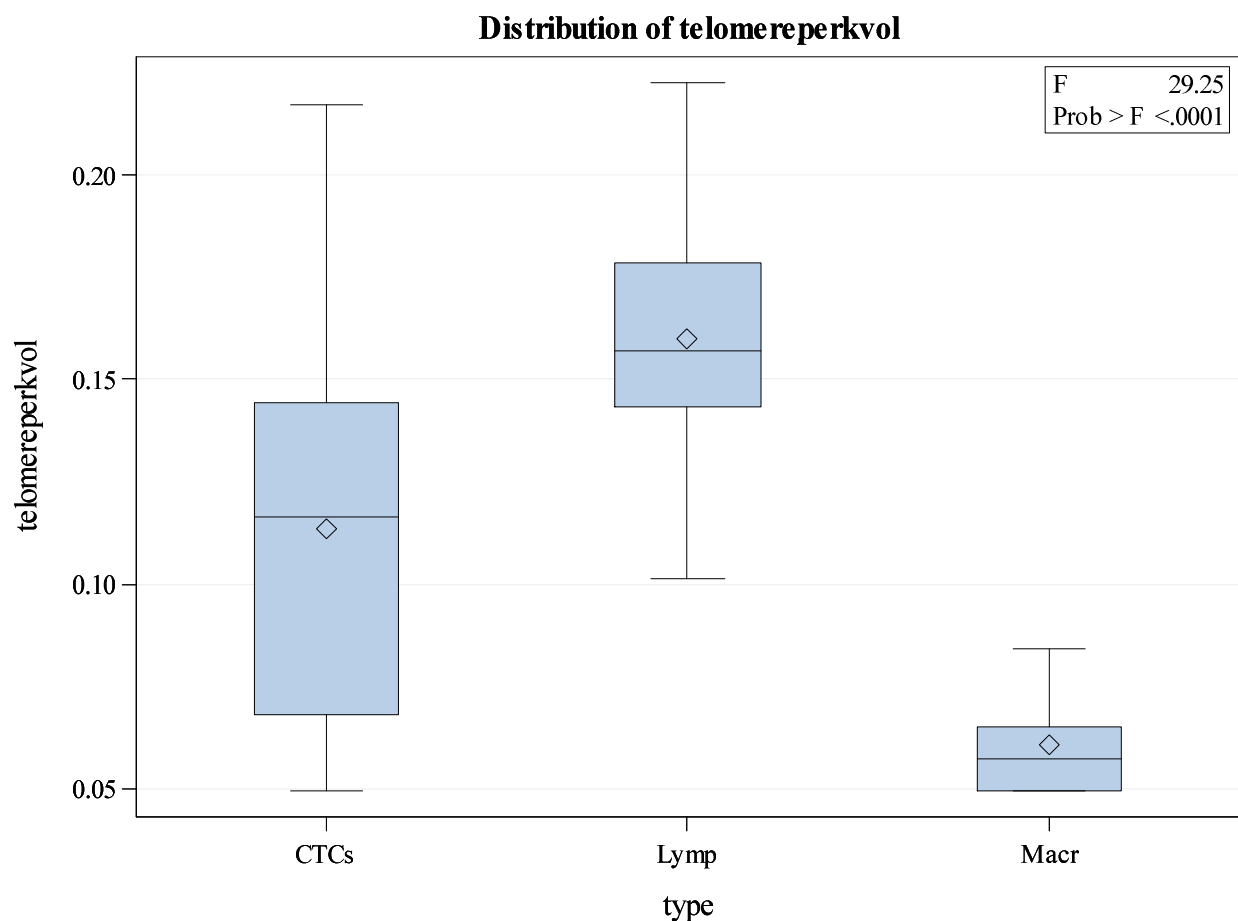



**The GLM Procedure**  
**Least Squares Means**

**pt=17AA0845**

| type        | Totalnofsignals<br>LSMEAN | Standard<br>Error | Pr >  t | LSMEAN<br>Number |
|-------------|---------------------------|-------------------|---------|------------------|
| <b>CTCs</b> | 172.875000                | 25.163929         | <.0001  | 1                |
| <b>Lymp</b> | 23.133333                 | 18.377135         | 0.2139  | 2                |
| <b>Macr</b> | 28.714286                 | 38.044284         | 0.4539  | 3                |

| Least Squares Means for effect type<br>Pr >  t  for H0: LSMean(i)=LSMean(j) |        |        |        |
|-----------------------------------------------------------------------------|--------|--------|--------|
| Dependent Variable: Totalnofsignals                                         |        |        |        |
| i/j                                                                         | 1      | 2      | 3      |
| 1                                                                           |        | <.0001 | 0.0027 |
| 2                                                                           | <.0001 |        | 0.8954 |
| 3                                                                           | 0.0027 | 0.8954 |        |

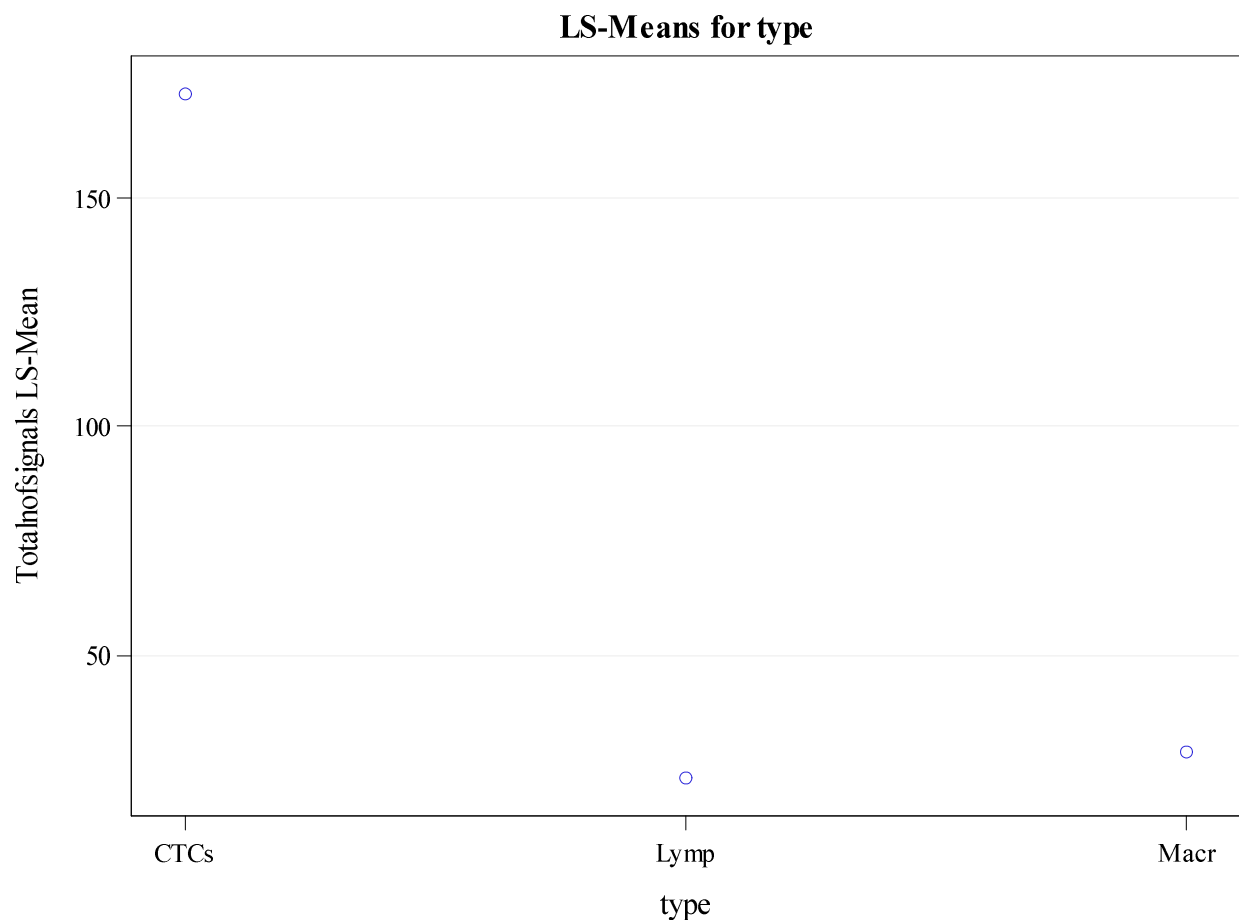

*The GLM Procedure*  
*Least Squares Means*

pt=17AA0845

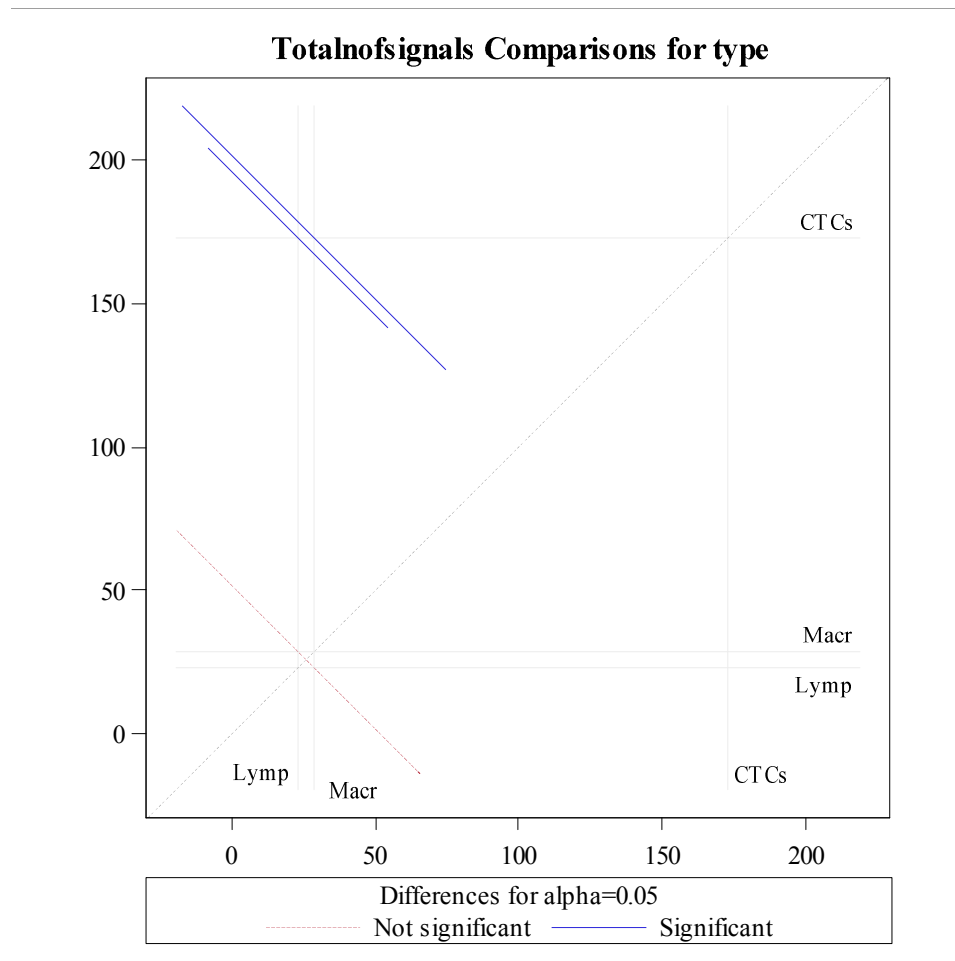

| type        | Totalnofaggregates<br>LSMEAN | Standard<br>Error | Pr >  t | LSMEAN<br>Number |
|-------------|------------------------------|-------------------|---------|------------------|
| <b>CTCs</b> | 20.0000000                   | 3.1150632         | <.0001  | 1                |
| <b>Lymp</b> | 1.8666667                    | 2.2749205         | 0.4158  | 2                |
| <b>Macr</b> | 2.7142857                    | 4.7095330         | 0.5670  | 3                |

***The GLM Procedure***  
***Least Squares Means***

pt=17AA0845

| Least Squares Means for effect type<br>Pr >  t  for H0: LSMean(i)=LSMean(j) |        |        |        |
|-----------------------------------------------------------------------------|--------|--------|--------|
| Dependent Variable: Totalnofaggregates                                      |        |        |        |
| i/j                                                                         | 1      | 2      | 3      |
| 1                                                                           |        | <.0001 | 0.0035 |
| 2                                                                           | <.0001 |        | 0.8719 |
| 3                                                                           | 0.0035 | 0.8719 |        |

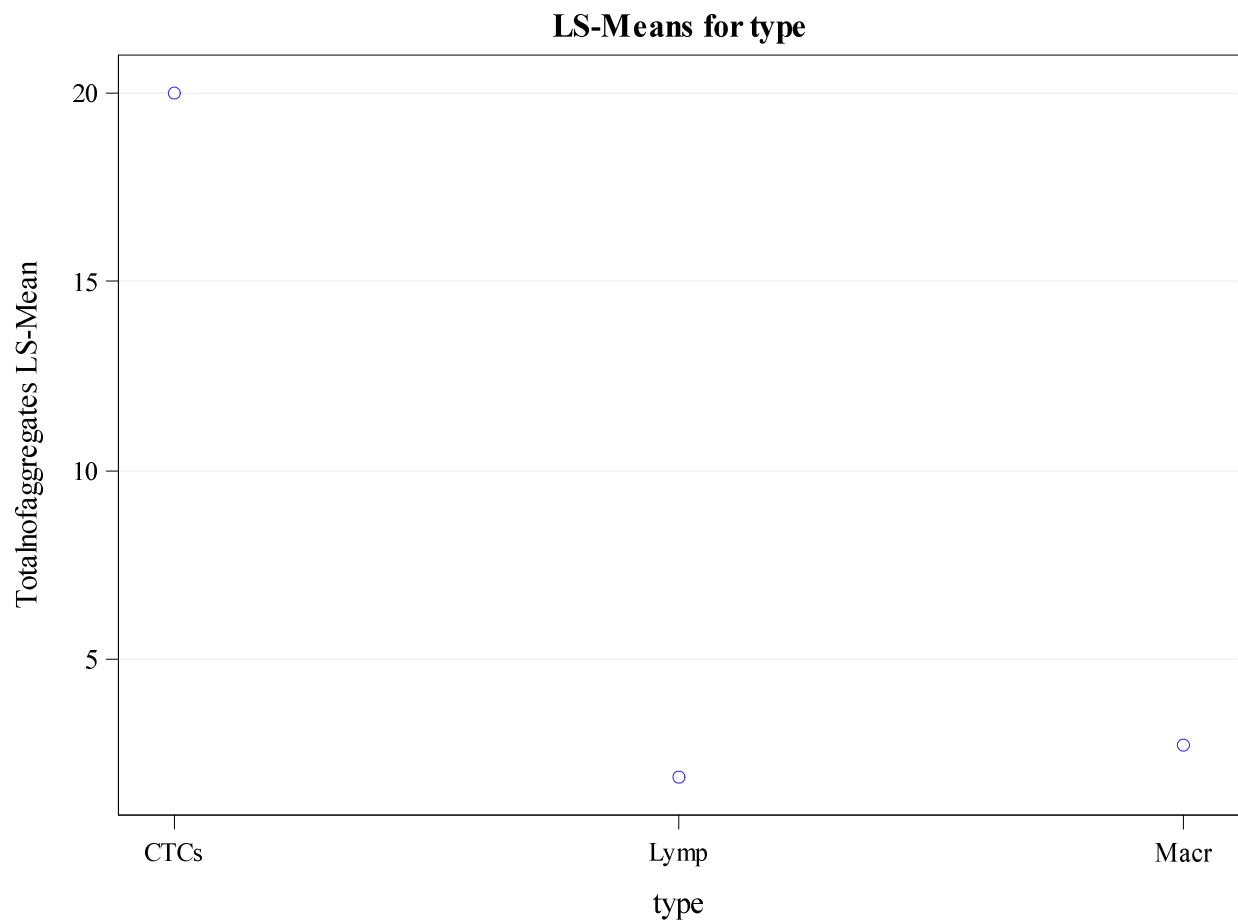

*The GLM Procedure*  
*Least Squares Means*

pt=17AA0845

**Totalnofaggagates Comparisons for type**

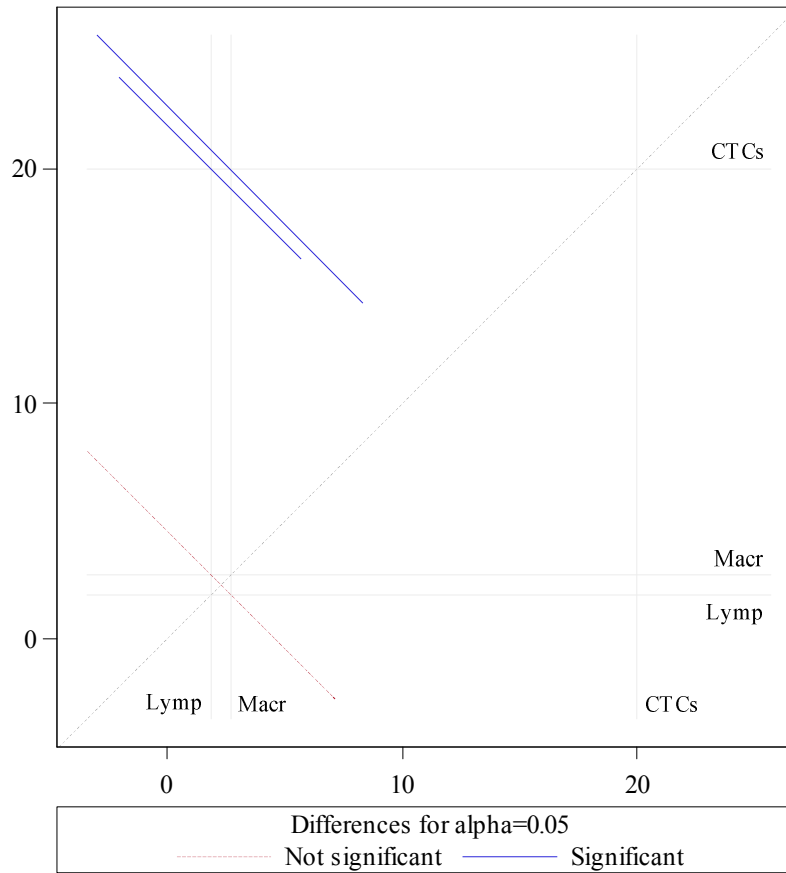

| type | acratio<br>LSMEAN | Standard<br>Error | Pr >  t | LSMEAN<br>Number |
|------|-------------------|-------------------|---------|------------------|
| CTCs | 4.19030338        | 0.30792047        | <.0001  | 1                |
| Lymp | 1.61927097        | 0.22487331        | <.0001  | 2                |
| Macr | 5.77629933        | 0.46553199        | <.0001  | 3                |

| Least Squares Means for effect type<br>Pr >  t  for H0: LSMean(i)=LSMean(j) |        |        |        |
|-----------------------------------------------------------------------------|--------|--------|--------|
| Dependent Variable: acratio                                                 |        |        |        |
| i/j                                                                         | 1      | 2      | 3      |
| 1                                                                           |        | <.0001 | 0.0065 |
| 2                                                                           | <.0001 |        | <.0001 |
| 3                                                                           | 0.0065 | <.0001 |        |

*The GLM Procedure*  
*Least Squares Means*

pt=17AA0845

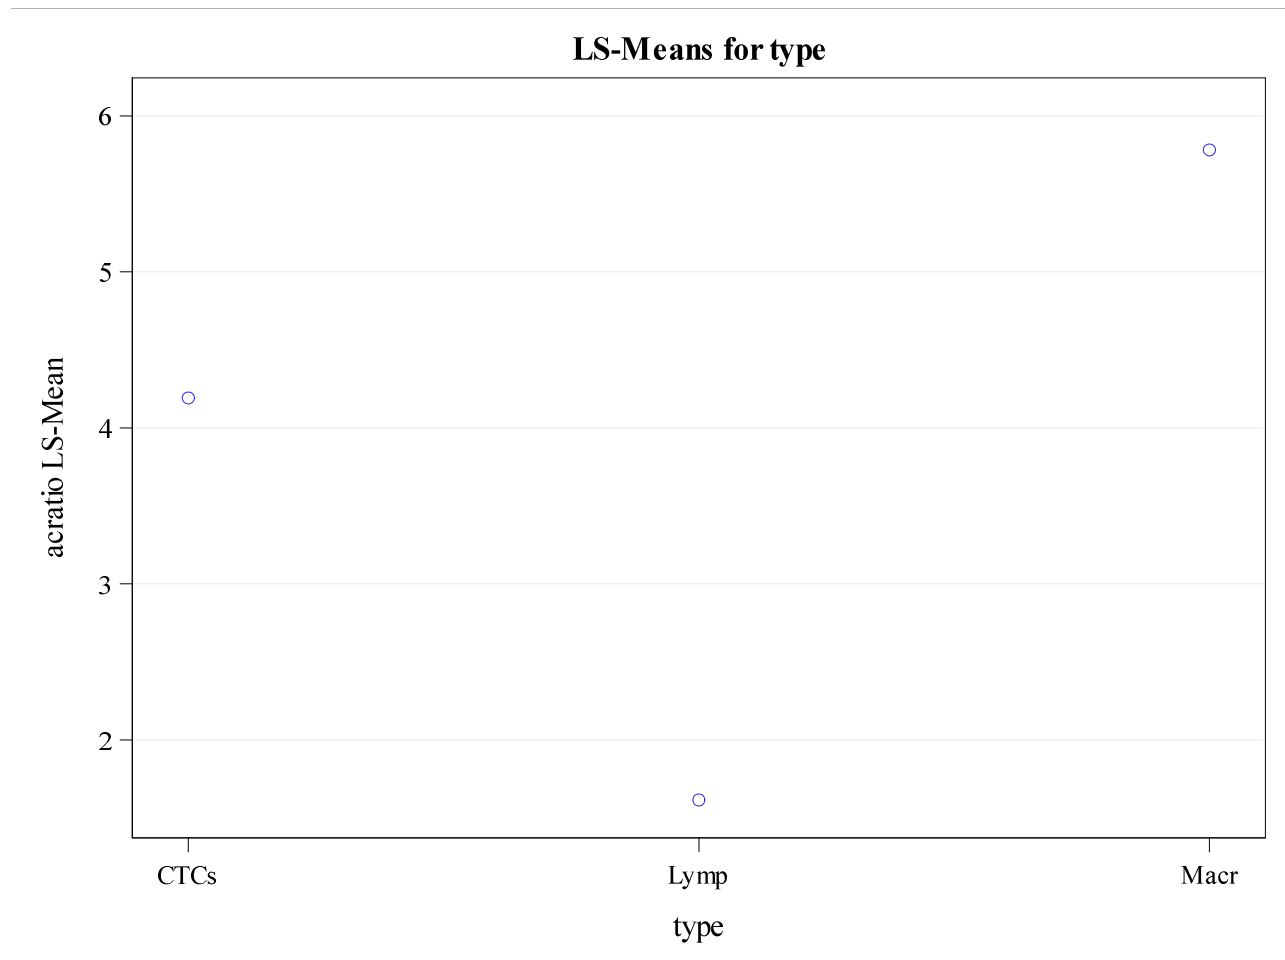

*The GLM Procedure*  
*Least Squares Means*

pt=17AA0845

acratio Comparisons for type

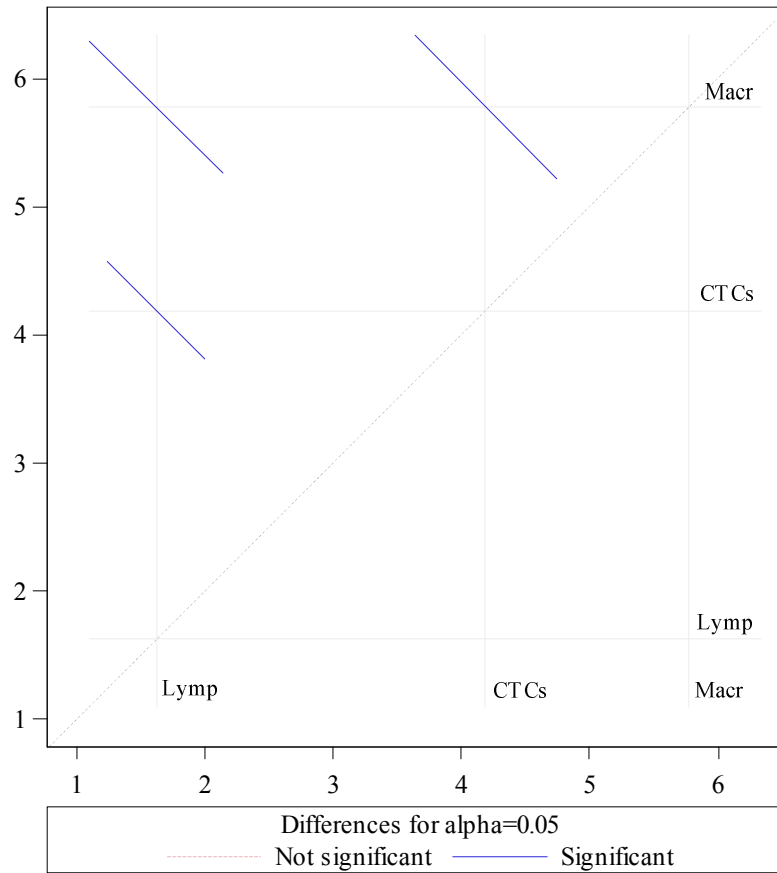

| type        | AvIntallsignals<br>LSMEAN | Standard<br>Error | Pr >  t | LSMEAN<br>Number |
|-------------|---------------------------|-------------------|---------|------------------|
| <b>CTCs</b> | 12792.7757                | 1239.3809         | <.0001  | 1                |
| <b>Lymp</b> | 25961.9650                | 905.1158          | <.0001  | 2                |
| <b>Macr</b> | 12954.8233                | 1873.7678         | <.0001  | 3                |

| Least Squares Means for effect type<br>Pr >  t  for H0: LSMean(i)=LSMean(j) |        |        |        |
|-----------------------------------------------------------------------------|--------|--------|--------|
| Dependent Variable: AvIntallsignals                                         |        |        |        |
| i/j                                                                         | 1      | 2      | 3      |
| 1                                                                           |        | <.0001 | 0.9428 |
| 2                                                                           | <.0001 |        | <.0001 |
| 3                                                                           | 0.9428 | <.0001 |        |

*The GLM Procedure*  
*Least Squares Means*

pt=17AA0845

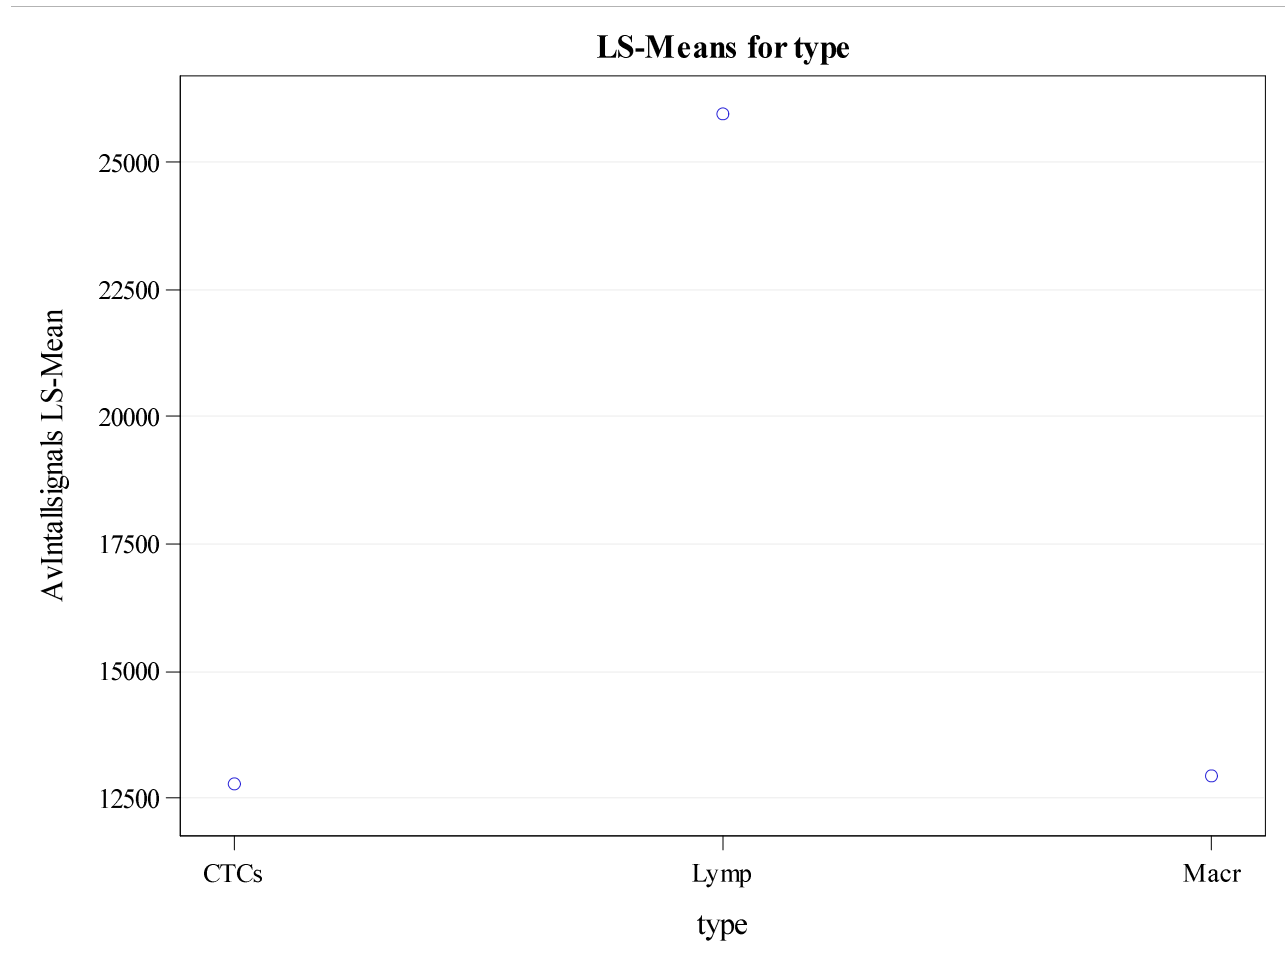

***The GLM Procedure***  
***Least Squares Means***

pt=17AA0845

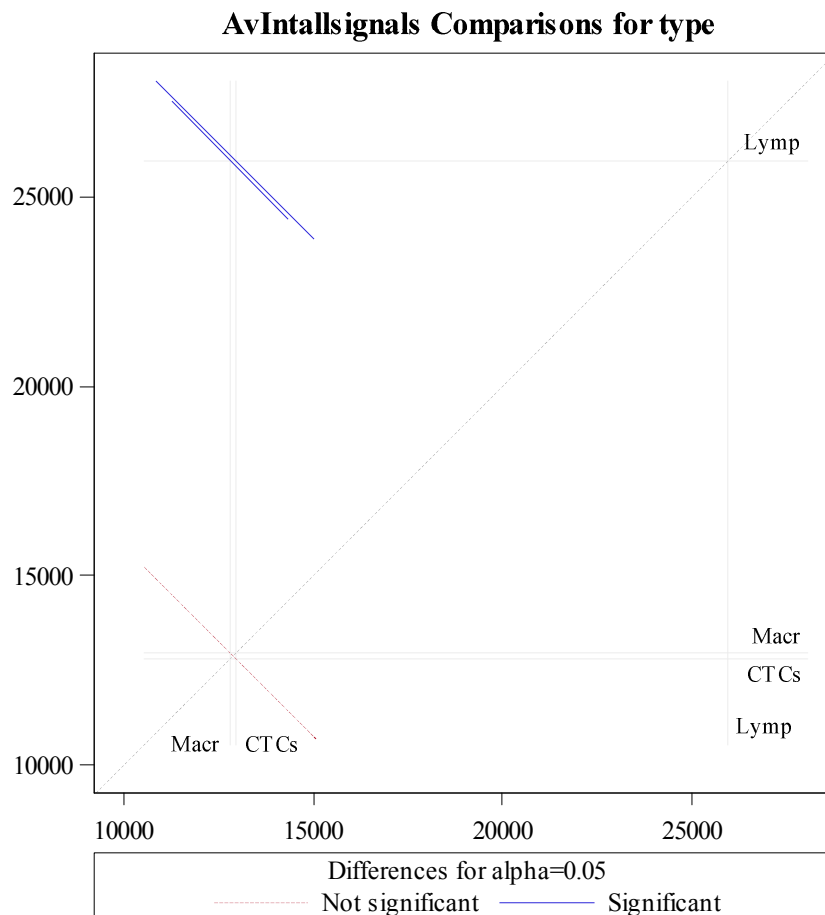

| type        | Totalintensity<br>LSMEAN | Standard<br>Error | Pr >  t | LSMEAN<br>Number |
|-------------|--------------------------|-------------------|---------|------------------|
| <b>CTCs</b> | 1971419.69               | 277211.36         | <.0001  | 1                |
| <b>Lymp</b> | 596723.40                | 202446.56         | 0.0049  | 2                |
| <b>Macr</b> | 372285.86                | 419104.19         | 0.3786  | 3                |

| Least Squares Means for effect type<br>Pr >  t  for H0: LSMean(i)=LSMean(j) |        |        |        |
|-----------------------------------------------------------------------------|--------|--------|--------|
| Dependent Variable: Totalintensity                                          |        |        |        |
| i/j                                                                         | 1      | 2      | 3      |
| 1                                                                           |        | 0.0002 | 0.0025 |
| 2                                                                           | 0.0002 |        | 0.6318 |
| 3                                                                           | 0.0025 | 0.6318 |        |



*The GLM Procedure*  
*Least Squares Means*

pt=17AA0845

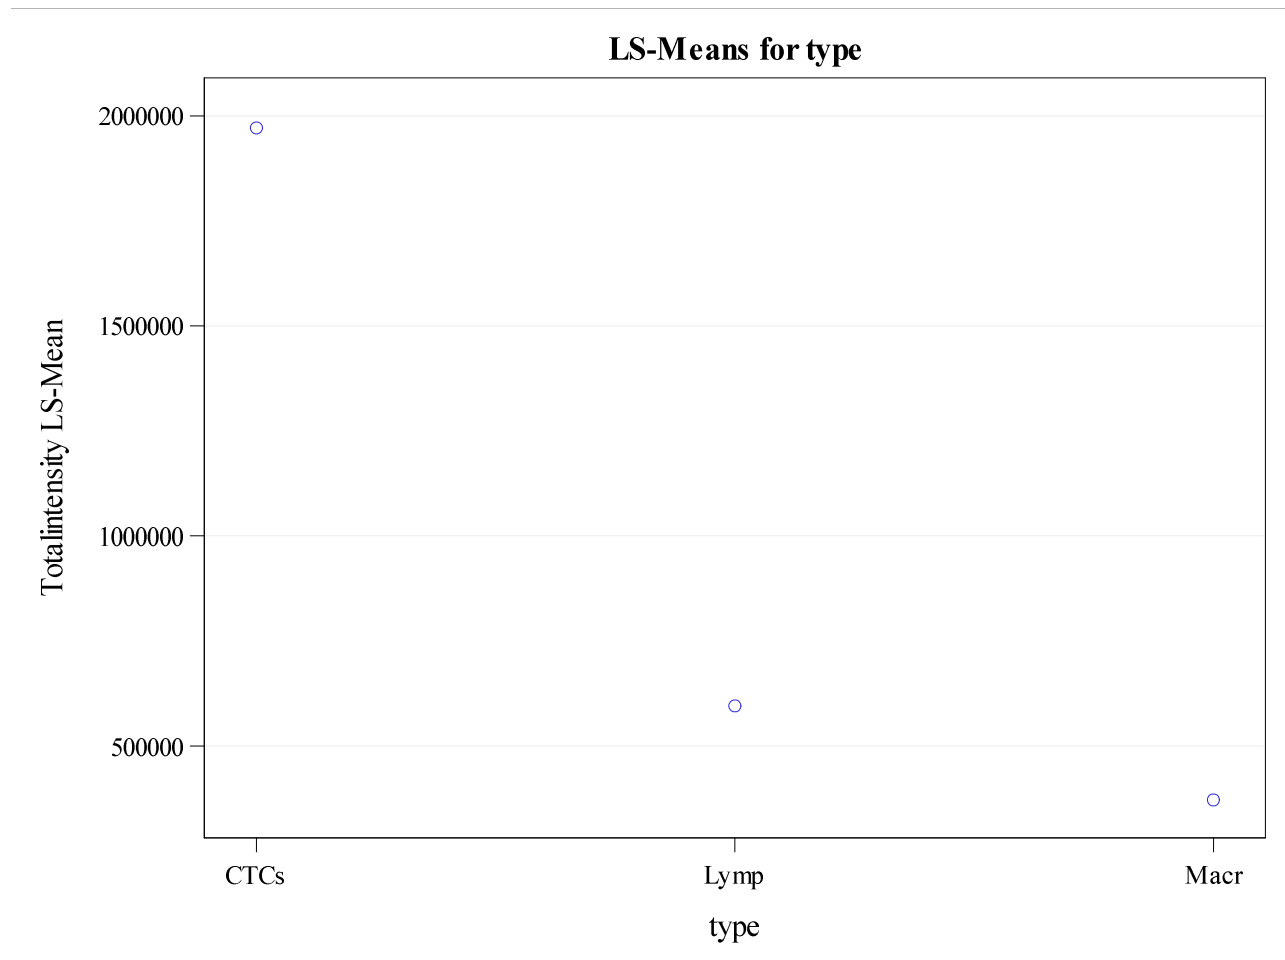

**The GLM Procedure**  
**Least Squares Means**

pt=17AA0845

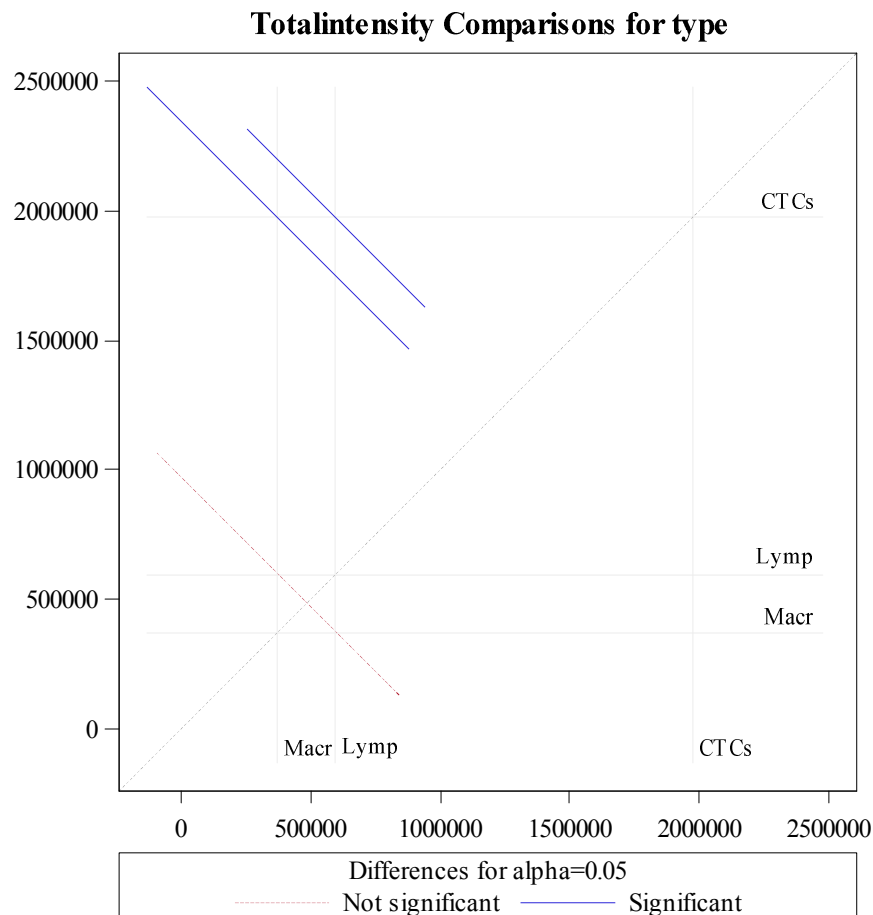

| type        | Nuclearvolume<br>LSMEAN | Standard<br>Error | Pr >  t | LSMEAN<br>Number |
|-------------|-------------------------|-------------------|---------|------------------|
| <b>CTCs</b> | 1336007.38              | 148237.52         | <.0001  | 1                |
| <b>Lymp</b> | 146145.93               | 108257.38         | 0.1831  | 2                |
| <b>Macr</b> | 476454.43               | 224114.06         | 0.0385  | 3                |

| Least Squares Means for effect type<br>Pr >  t  for H0: LSMean(i)=LSMean(j) |        |        |        |
|-----------------------------------------------------------------------------|--------|--------|--------|
| Dependent Variable: Nuclearvolume                                           |        |        |        |
| i/j                                                                         | 1      | 2      | 3      |
| 1                                                                           |        | <.0001 | 0.0024 |
| 2                                                                           | <.0001 |        | 0.1905 |
| 3                                                                           | 0.0024 | 0.1905 |        |

*The GLM Procedure*  
*Least Squares Means*

pt=17AA0845

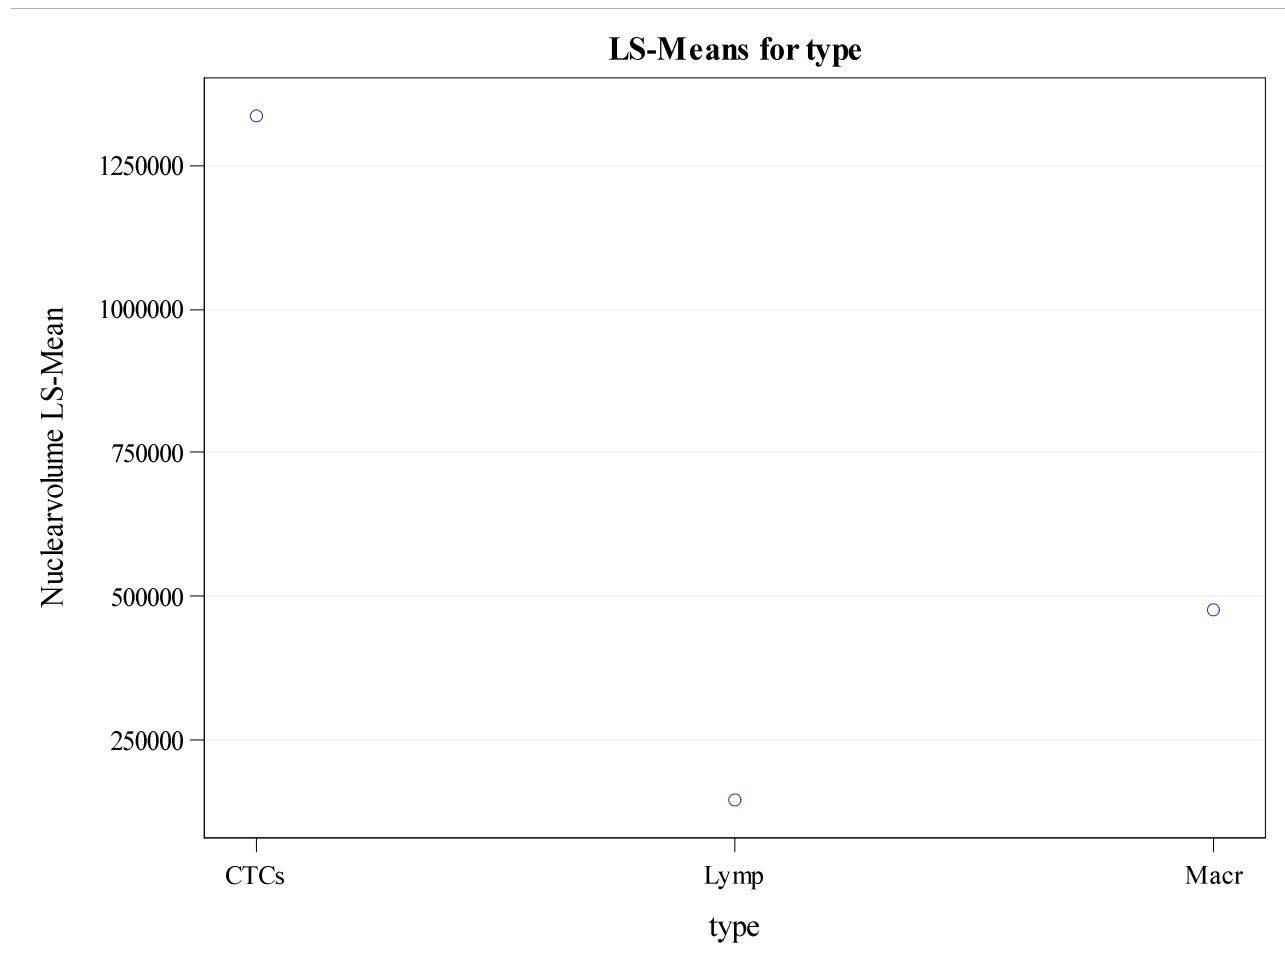

**The GLM Procedure**  
**Least Squares Means**

**pt=17AA0845**

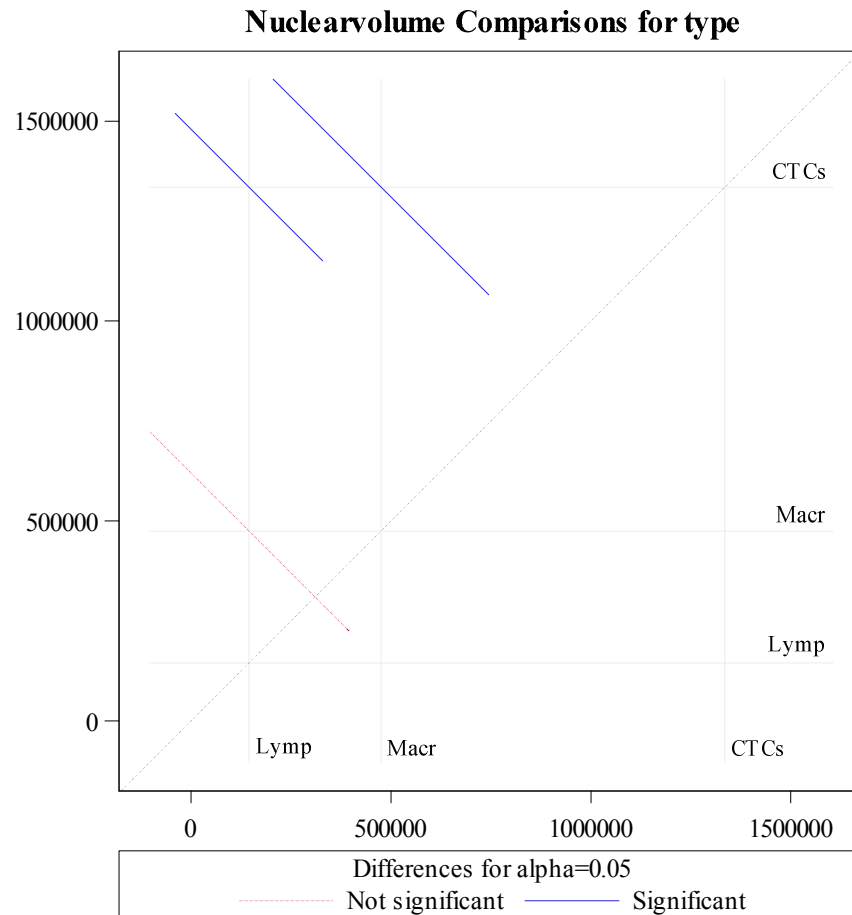

| type        | telomereperkvol<br>LSMEAN | Standard<br>Error | Pr >  t | LSMEAN<br>Number |
|-------------|---------------------------|-------------------|---------|------------------|
| <b>CTCs</b> | 0.11361736                | 0.00829627        | <.0001  | 1                |
| <b>Lymp</b> | 0.15990522                | 0.00605874        | <.0001  | 2                |
| <b>Macr</b> | 0.06060256                | 0.01254279        | <.0001  | 3                |

| Least Squares Means for effect type<br>Pr >  t  for H0: LSMean(i)=LSMean(j) |        |        |        |
|-----------------------------------------------------------------------------|--------|--------|--------|
| Dependent Variable: telomereperkvol                                         |        |        |        |
| i/j                                                                         | 1      | 2      | 3      |
| 1                                                                           |        | <.0001 | 0.0009 |
| 2                                                                           | <.0001 |        | <.0001 |
| 3                                                                           | 0.0009 | <.0001 |        |

*The GLM Procedure*  
*Least Squares Means*

pt=17AA0845

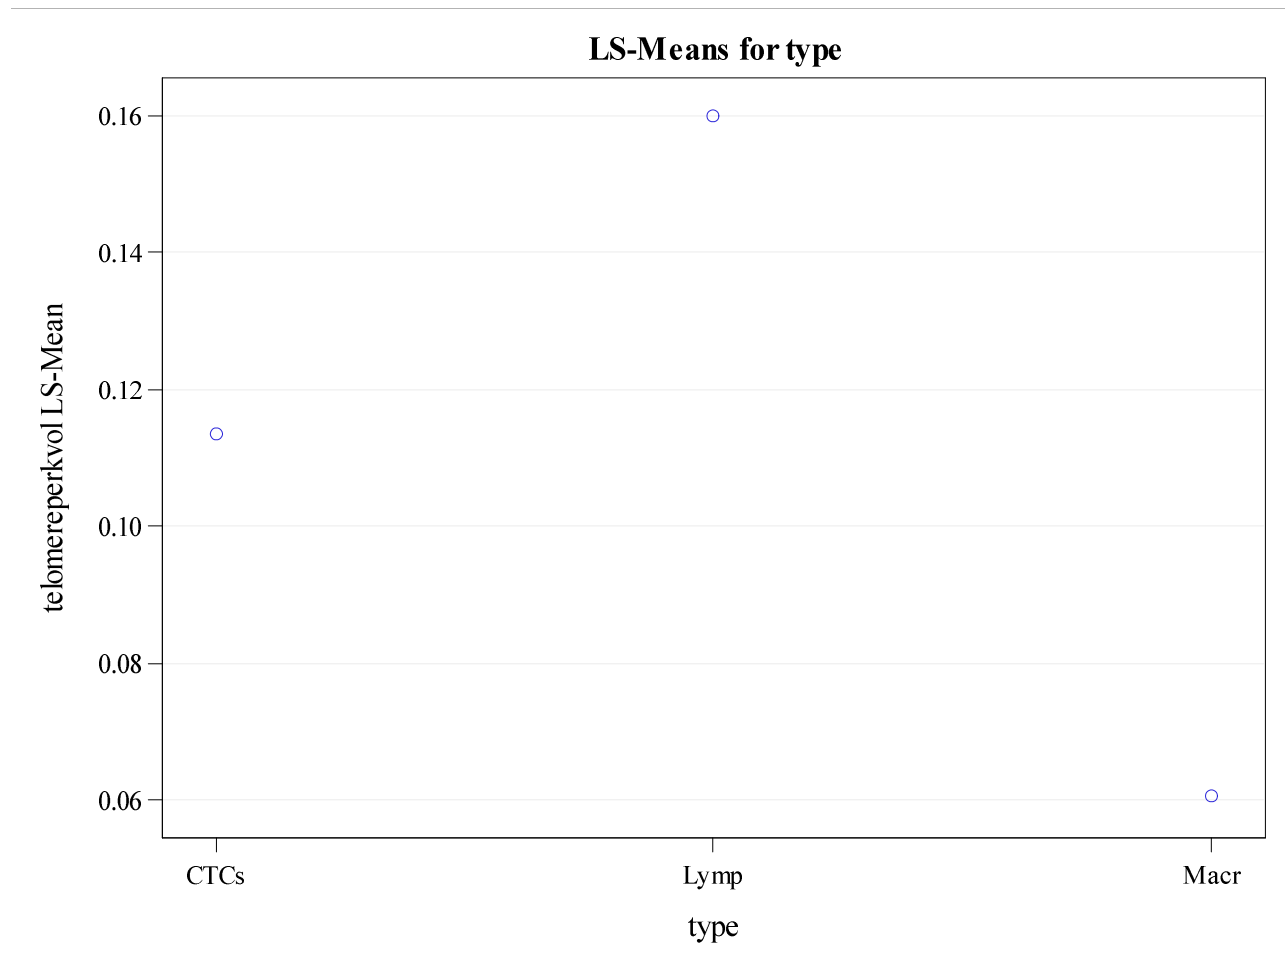

*The GLM Procedure*  
*Least Squares Means*

pt=17AA0845

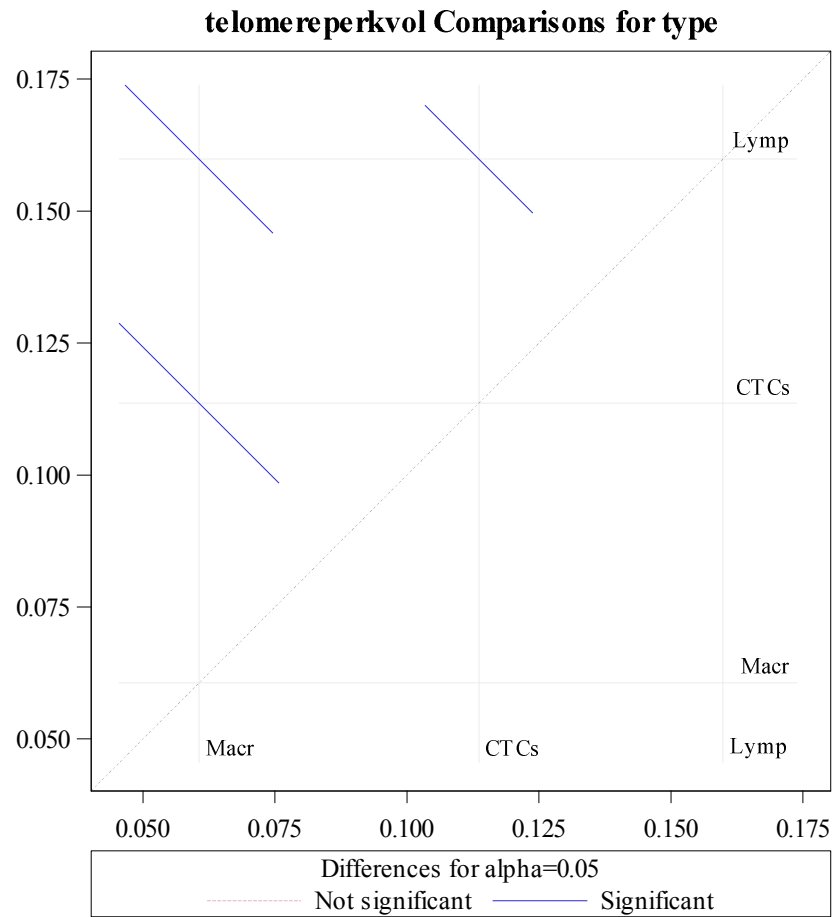

**Note:** To ensure overall protection level, only probabilities associated with pre-planned comparisons should be used.

*The GLM Procedure*

pt=17AA1313

| Class Level Information |        |                |
|-------------------------|--------|----------------|
| Class                   | Levels | Values         |
| type                    | 3      | CTCs Lymp Macr |

|                             |     |
|-----------------------------|-----|
| Number of Observations Read | 105 |
| Number of Observations Used | 105 |

**The GLM Procedure**

**Dependent Variable: Totalnofsignals**  
**Totalnofsignals**

**pt=17AA1313**

| Source                 | DF  | Sum of Squares | Mean Square | F Value | Pr > F |
|------------------------|-----|----------------|-------------|---------|--------|
| <b>Model</b>           | 2   | 76139.5482     | 38069.7741  | 44.17   | <.0001 |
| <b>Error</b>           | 102 | 87908.1090     | 861.8442    |         |        |
| <b>Corrected Total</b> | 104 | 164047.6571    |             |         |        |

| R-Square | Coeff Var | Root MSE | Totalnofsignals Mean |
|----------|-----------|----------|----------------------|
| 0.464131 | 57.17871  | 29.35718 | 51.34286             |

| Source      | DF | Type III SS | Mean Square | F Value | Pr > F |
|-------------|----|-------------|-------------|---------|--------|
| <b>type</b> | 2  | 76139.54817 | 38069.77408 | 44.17   | <.0001 |

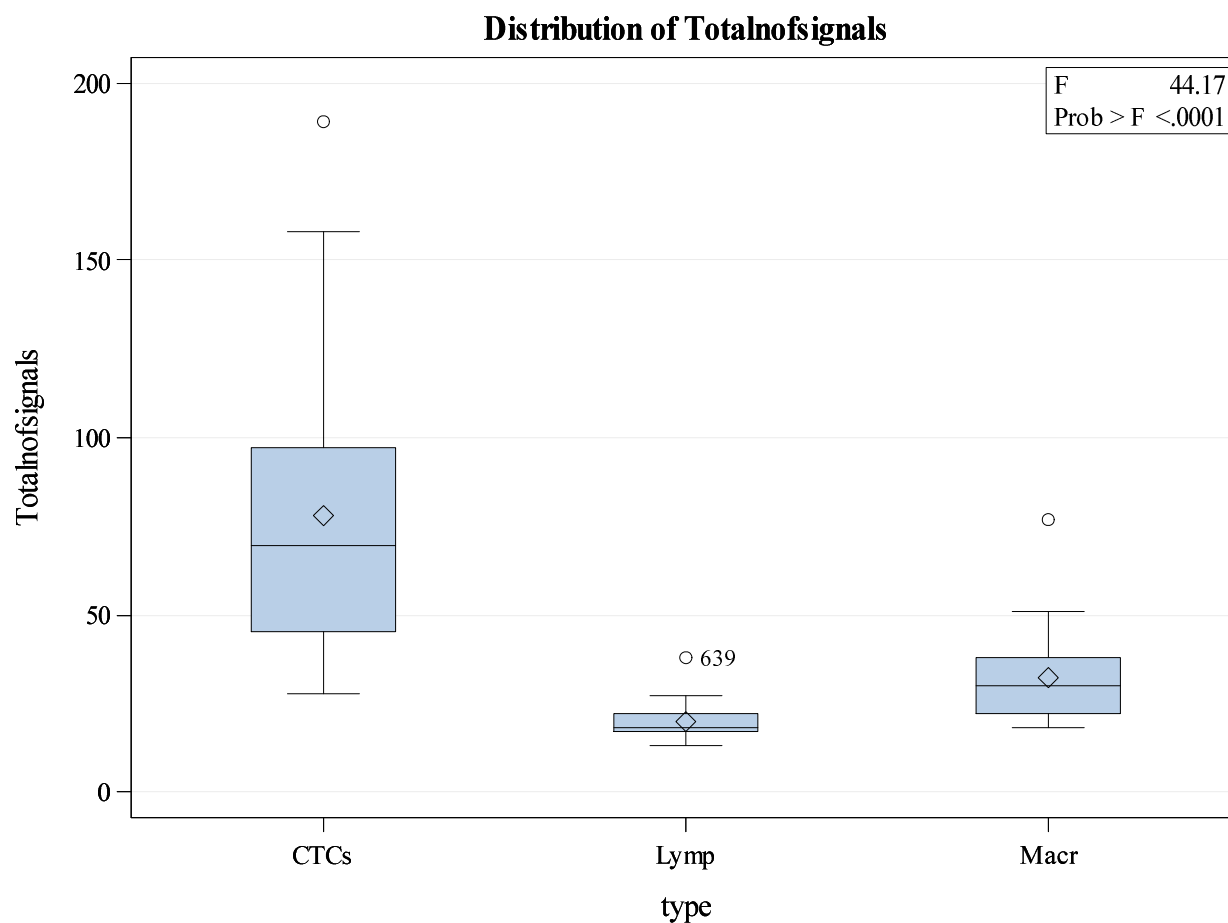



**The GLM Procedure****Dependent Variable: Totalnofaggregates Totalnofaggregates****pt=17AA1313**

| Source                 | DF  | Sum of Squares | Mean Square | F Value | Pr > F |
|------------------------|-----|----------------|-------------|---------|--------|
| <b>Model</b>           | 2   | 868.800964     | 434.400482  | 21.56   | <.0001 |
| <b>Error</b>           | 102 | 2055.446656    | 20.151438   |         |        |
| <b>Corrected Total</b> | 104 | 2924.247619    |             |         |        |

| R-Square | Coeff Var | Root MSE | Totalnofaggregates Mean |
|----------|-----------|----------|-------------------------|
| 0.297102 | 81.54822  | 4.489035 | 5.504762                |

| Source      | DF | Type III SS | Mean Square | F Value | Pr > F |
|-------------|----|-------------|-------------|---------|--------|
| <b>type</b> | 2  | 868.8009635 | 434.4004818 | 21.56   | <.0001 |

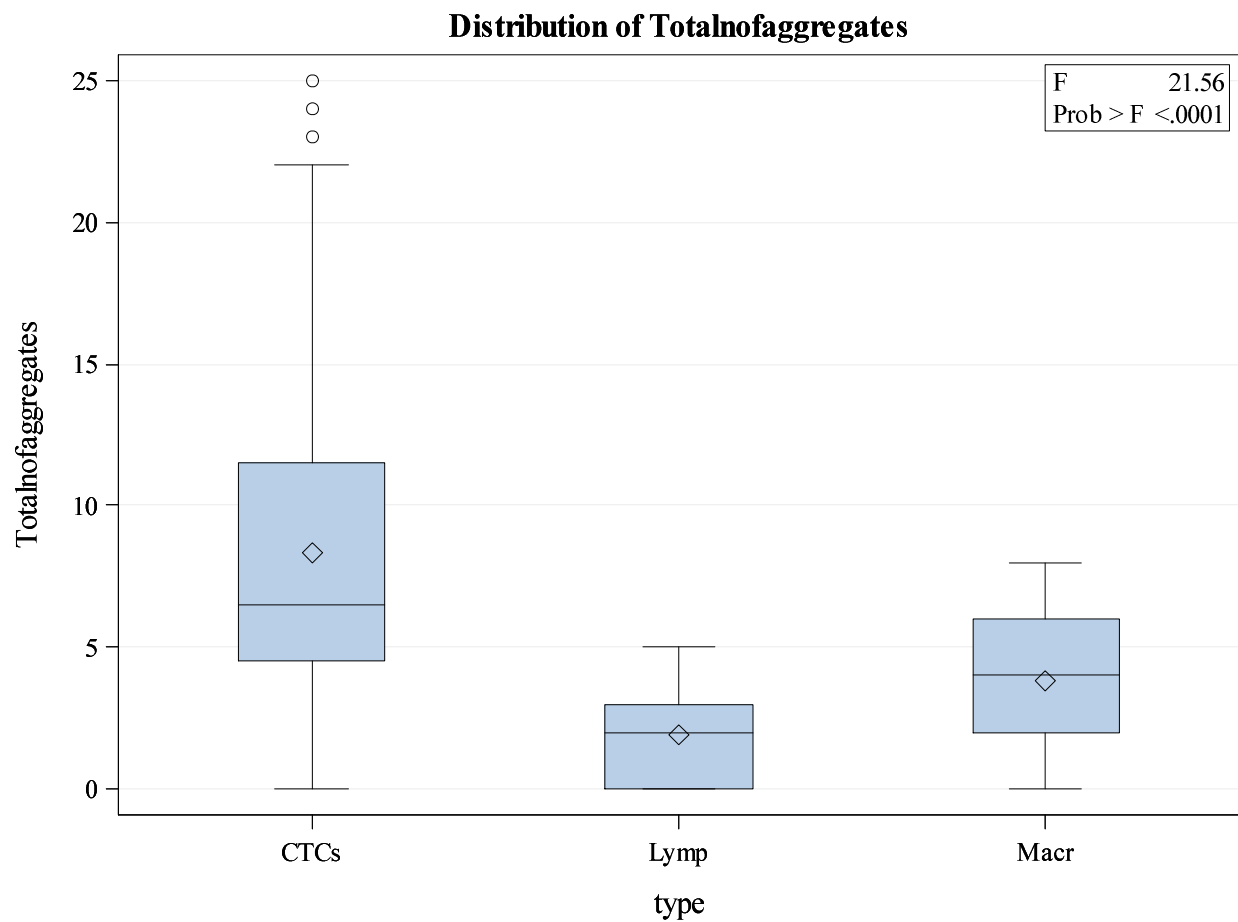

**The GLM Procedure**

**Dependent Variable: acratio**  
**acratio**

**pt=17AA1313**

| Source                 | DF  | Sum of Squares | Mean Square | F Value | Pr > F |
|------------------------|-----|----------------|-------------|---------|--------|
| <b>Model</b>           | 2   | 123.7318413    | 61.8659206  | 23.16   | <.0001 |
| <b>Error</b>           | 102 | 272.5000089    | 2.6715687   |         |        |
| <b>Corrected Total</b> | 104 | 396.2318501    |             |         |        |

| R-Square | Coeff Var | Root MSE | acratio Mean |
|----------|-----------|----------|--------------|
| 0.312271 | 60.76809  | 1.634493 | 2.689723     |

| Source      | DF | Type III SS | Mean Square | F Value | Pr > F |
|-------------|----|-------------|-------------|---------|--------|
| <b>type</b> | 2  | 123.7318413 | 61.8659206  | 23.16   | <.0001 |

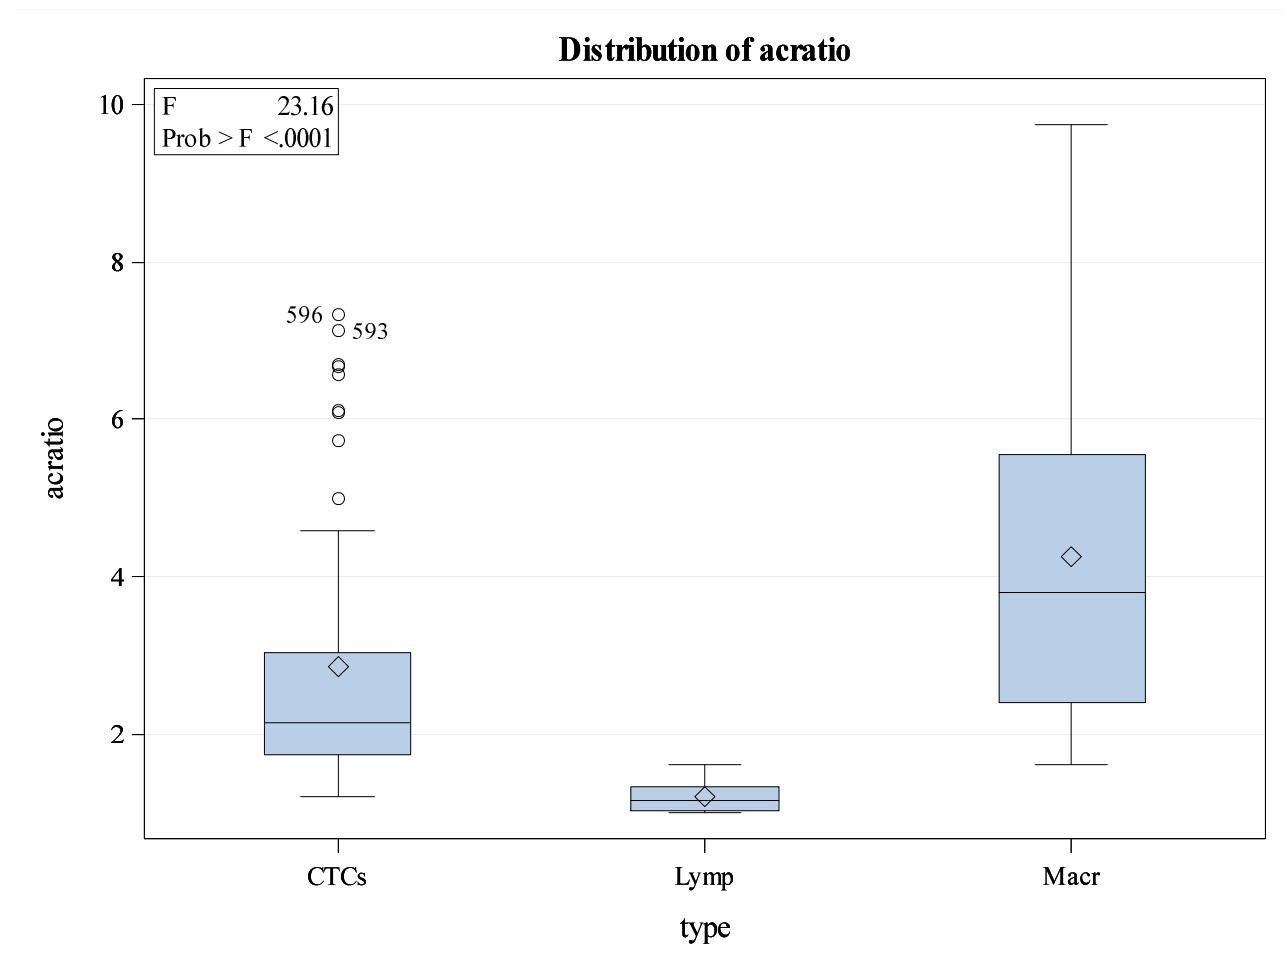

**The GLM Procedure**

**Dependent Variable: AvIntallsignals**  
**AvIntallsignals**

**pt=17AA1313**

| Source                 | DF  | Sum of Squares | Mean Square | F Value | Pr > F |
|------------------------|-----|----------------|-------------|---------|--------|
| <b>Model</b>           | 2   | 2528963429     | 1264481715  | 81.75   | <.0001 |
| <b>Error</b>           | 102 | 1577662475     | 15467279    |         |        |
| <b>Corrected Total</b> | 104 | 4106625904     |             |         |        |

| R-Square | Coeff Var | Root MSE | AvIntallsignals Mean |
|----------|-----------|----------|----------------------|
| 0.615825 | 29.99626  | 3932.846 | 13111.12             |

| Source      | DF | Type III SS | Mean Square | F Value | Pr > F |
|-------------|----|-------------|-------------|---------|--------|
| <b>type</b> | 2  | 2528963429  | 1264481715  | 81.75   | <.0001 |

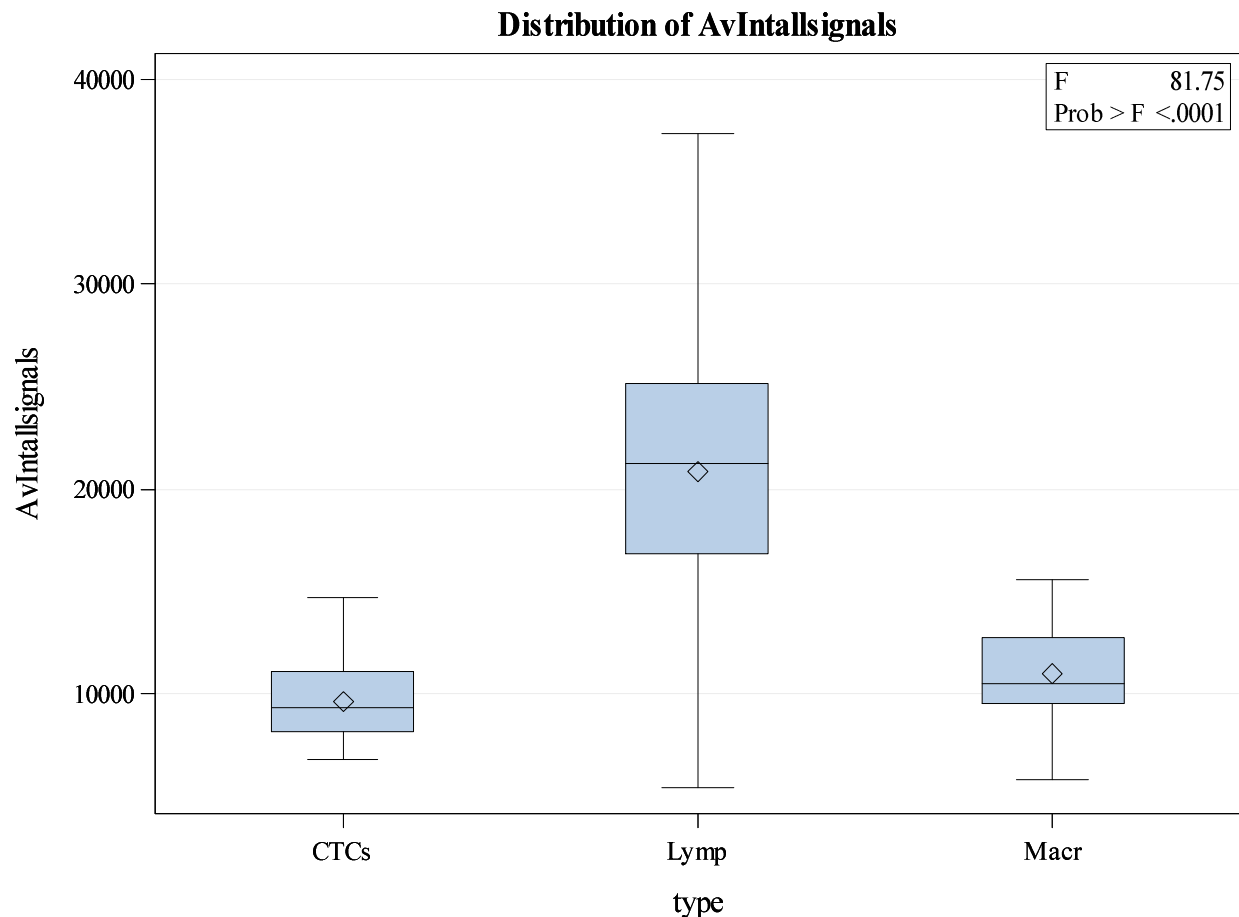

**The GLM Procedure**

**Dependent Variable: Totalintensity**  
**Totalintensity**

**pt=17AA1313**

| Source                 | DF  | Sum of Squares | Mean Square  | F Value | Pr > F |
|------------------------|-----|----------------|--------------|---------|--------|
| <b>Model</b>           | 2   | 3.3490693E12   | 1.6745346E12 | 25.38   | <.0001 |
| <b>Error</b>           | 102 | 6.7310193E12   | 65990385003  |         |        |
| <b>Corrected Total</b> | 104 | 1.0080089E13   |              |         |        |

| R-Square | Coeff Var | Root MSE | Totalintensity Mean |
|----------|-----------|----------|---------------------|
| 0.332246 | 46.58191  | 256885.9 | 551471.4            |

| Source      | DF | Type III SS  | Mean Square  | F Value | Pr > F |
|-------------|----|--------------|--------------|---------|--------|
| <b>type</b> | 2  | 3.3490693E12 | 1.6745346E12 | 25.38   | <.0001 |

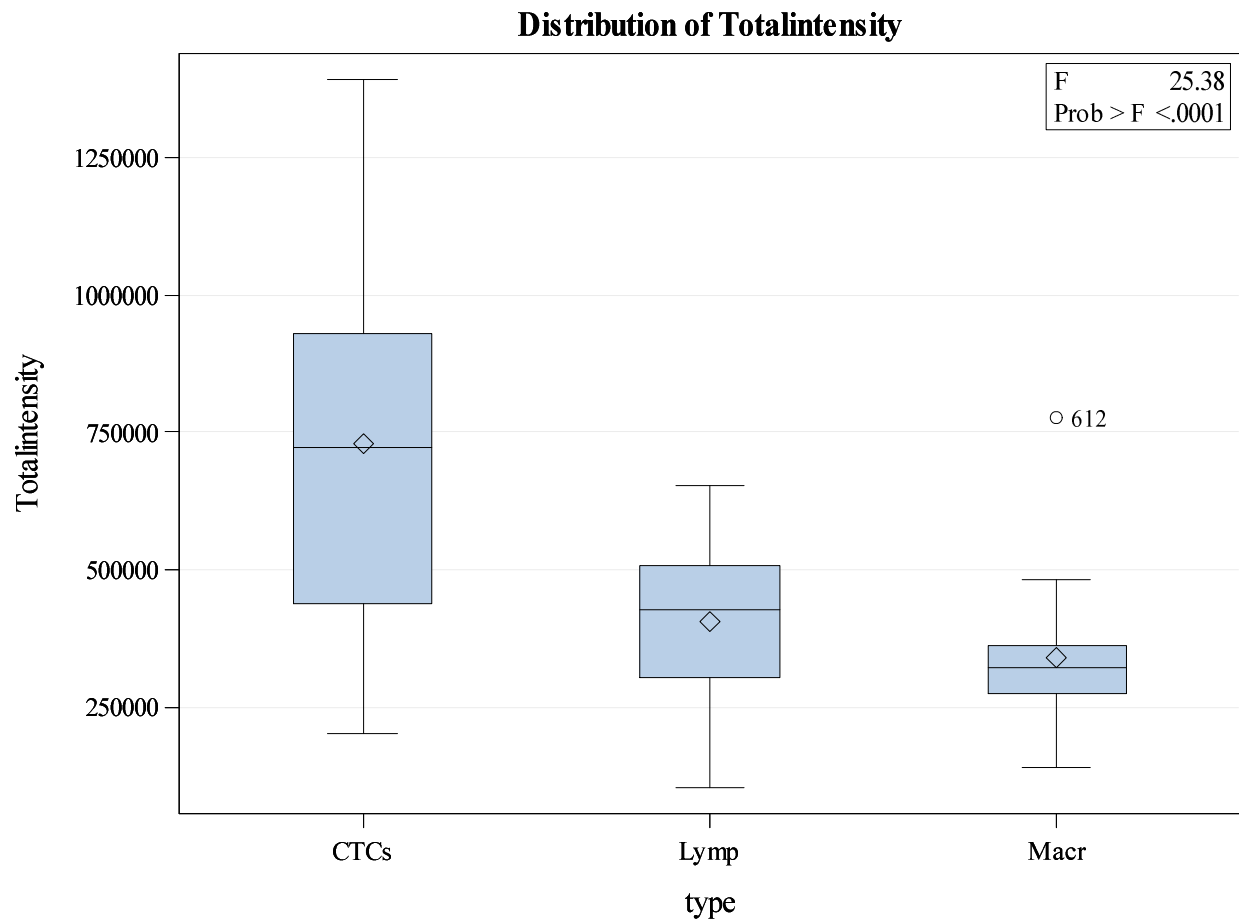

**The GLM Procedure**

**Dependent Variable: Nuclearvolume**  
**Nuclearvolume**

**pt=17AA1313**

| Source                 | DF  | Sum of Squares | Mean Square  | F Value | Pr > F |
|------------------------|-----|----------------|--------------|---------|--------|
| <b>Model</b>           | 2   | 7.6470012E12   | 3.8235006E12 | 88.48   | <.0001 |
| <b>Error</b>           | 102 | 4.407574E12    | 43211509891  |         |        |
| <b>Corrected Total</b> | 104 | 1.2054575E13   |              |         |        |

| R-Square | Coeff Var | Root MSE | Nuclearvolume Mean |
|----------|-----------|----------|--------------------|
| 0.634365 | 39.22162  | 207873.8 | 529998.0           |

| Source      | DF | Type III SS  | Mean Square  | F Value | Pr > F |
|-------------|----|--------------|--------------|---------|--------|
| <b>type</b> | 2  | 7.6470012E12 | 3.8235006E12 | 88.48   | <.0001 |

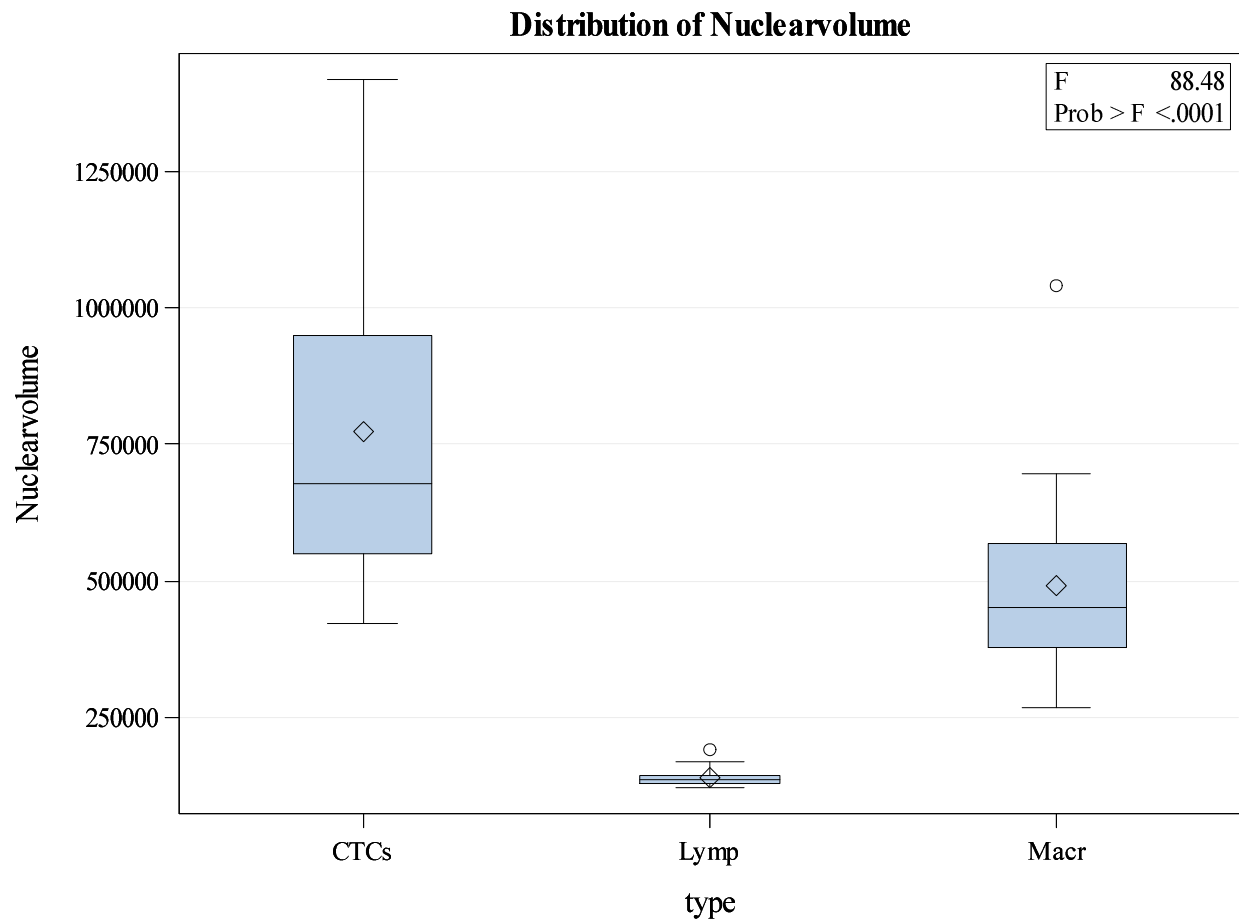

*The GLM Procedure**Dependent Variable: telomereperkvol*

pt=17AA1313

| Source                 | DF  | Sum of Squares | Mean Square | F Value | Pr > F |
|------------------------|-----|----------------|-------------|---------|--------|
| <b>Model</b>           | 2   | 0.07191542     | 0.03595771  | 31.38   | <.0001 |
| <b>Error</b>           | 102 | 0.11689247     | 0.00114600  |         |        |
| <b>Corrected Total</b> | 104 | 0.18880789     |             |         |        |

| R-Square | Coeff Var | Root MSE | telomereperkvol Mean |
|----------|-----------|----------|----------------------|
| 0.380892 | 32.04627  | 0.033853 | 0.105637             |

| Source      | DF | Type III SS | Mean Square | F Value | Pr > F |
|-------------|----|-------------|-------------|---------|--------|
| <b>type</b> | 2  | 0.07191542  | 0.03595771  | 31.38   | <.0001 |

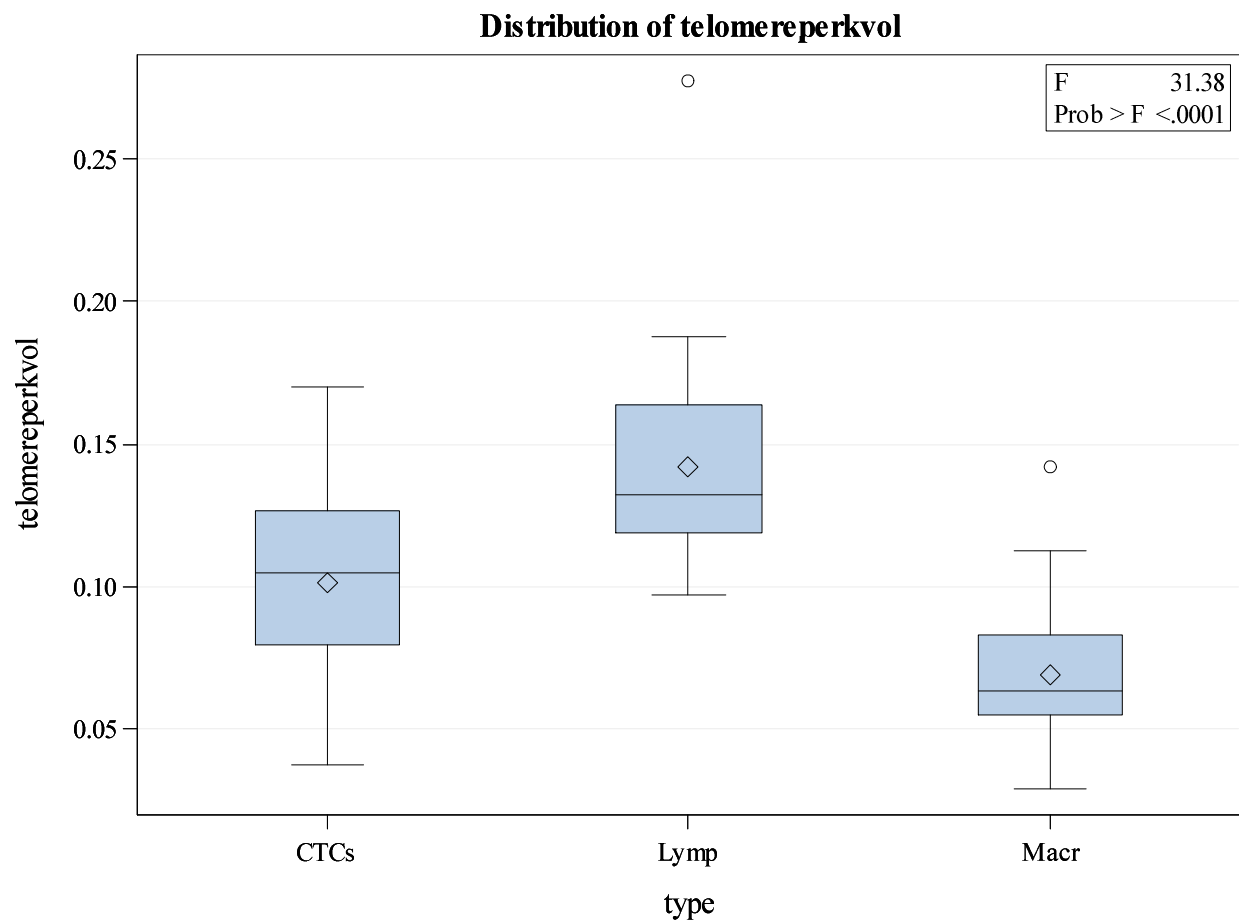

**The GLM Procedure**  
**Least Squares Means**

pt=17AA1313

| type | Totalnofsignals<br>LSMEAN | Standard<br>Error | Pr >  t | LSMEAN<br>Number |
|------|---------------------------|-------------------|---------|------------------|
| CTCs | 78.1730769                | 4.0711088         | <.0001  | 1                |
| Lymp | 19.6666667                | 5.3598638         | 0.0004  | 2                |
| Macr | 32.0000000                | 6.1213959         | <.0001  | 3                |

| Least Squares Means for effect type<br>Pr >  t  for H0: LSMean(i)=LSMean(j) |        |        |        |
|-----------------------------------------------------------------------------|--------|--------|--------|
| Dependent Variable: Totalnofsignals                                         |        |        |        |
| i/j                                                                         | 1      | 2      | 3      |
| 1                                                                           |        | <.0001 | <.0001 |
| 2                                                                           | <.0001 |        | 0.1327 |
| 3                                                                           | <.0001 | 0.1327 |        |

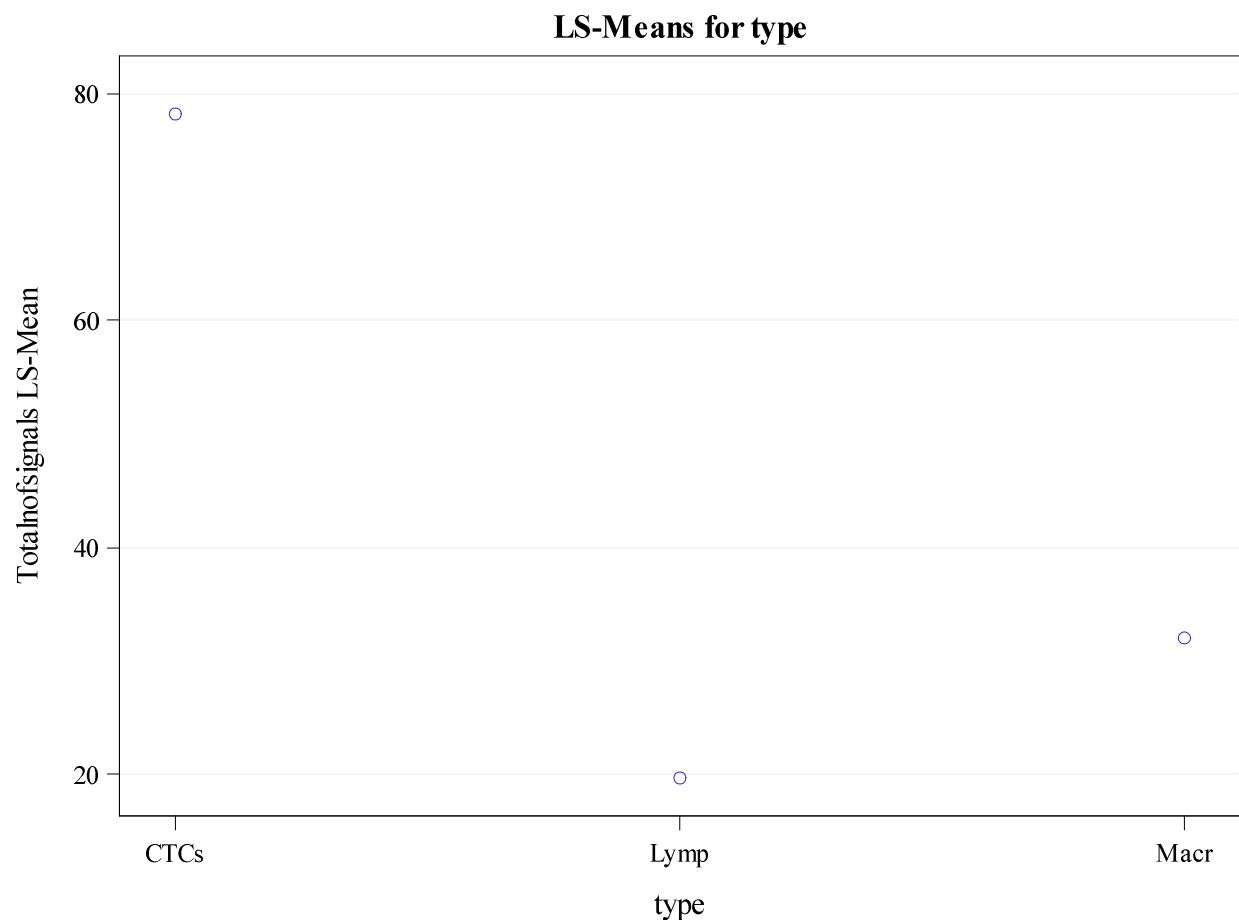

***The GLM Procedure***  
***Least Squares Means***

**pt=17AA1313**

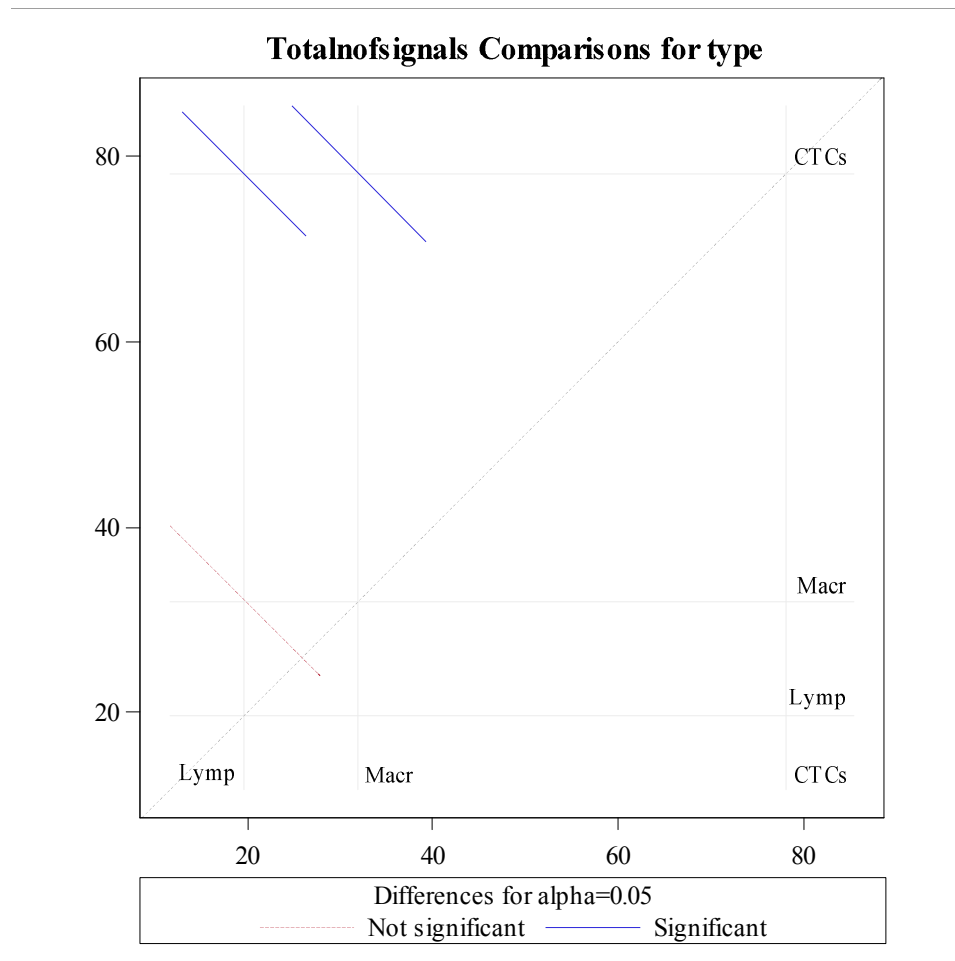

| type        | Totalnofaggregates<br>LSMEAN | Standard<br>Error | Pr >  t | LSMEAN<br>Number |
|-------------|------------------------------|-------------------|---------|------------------|
| <b>CTCs</b> | 8.32692308                   | 0.62251719        | <.0001  | 1                |
| <b>Lymp</b> | 1.90000000                   | 0.81958196        | 0.0224  | 2                |
| <b>Macr</b> | 3.82608696                   | 0.93602856        | <.0001  | 3                |



***The GLM Procedure***  
***Least Squares Means***

pt=17AA1313

| Least Squares Means for effect type<br>Pr >  t  for H0: LSMean(i)=LSMean(j) |        |        |        |
|-----------------------------------------------------------------------------|--------|--------|--------|
| Dependent Variable: Totalnofaggregates                                      |        |        |        |
| i/j                                                                         | 1      | 2      | 3      |
| 1                                                                           |        | <.0001 | 0.0001 |
| 2                                                                           | <.0001 |        | 0.1247 |
| 3                                                                           | 0.0001 | 0.1247 |        |

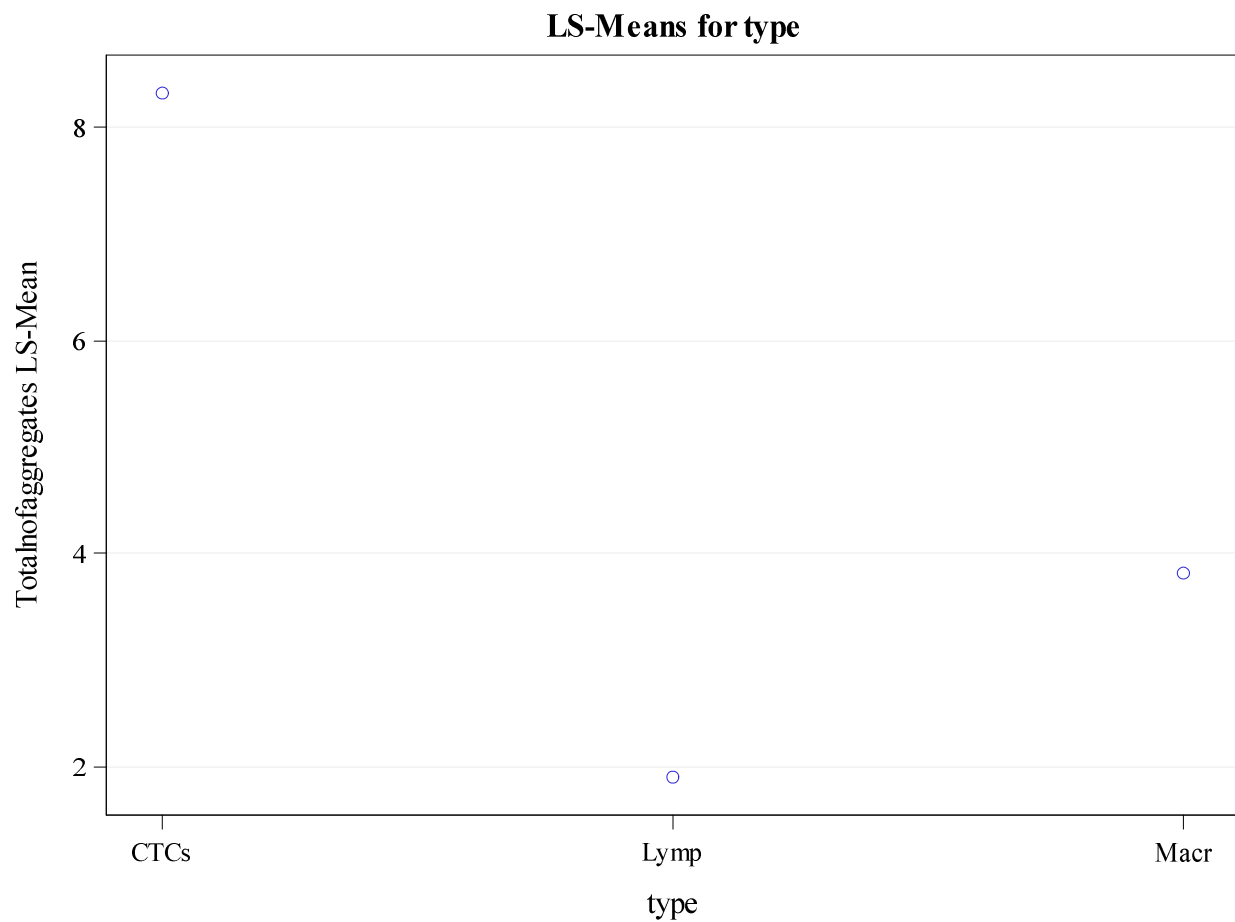

**The GLM Procedure**  
**Least Squares Means**

pt=17AA1313

**Totalnofaggagates Comparisons for type**

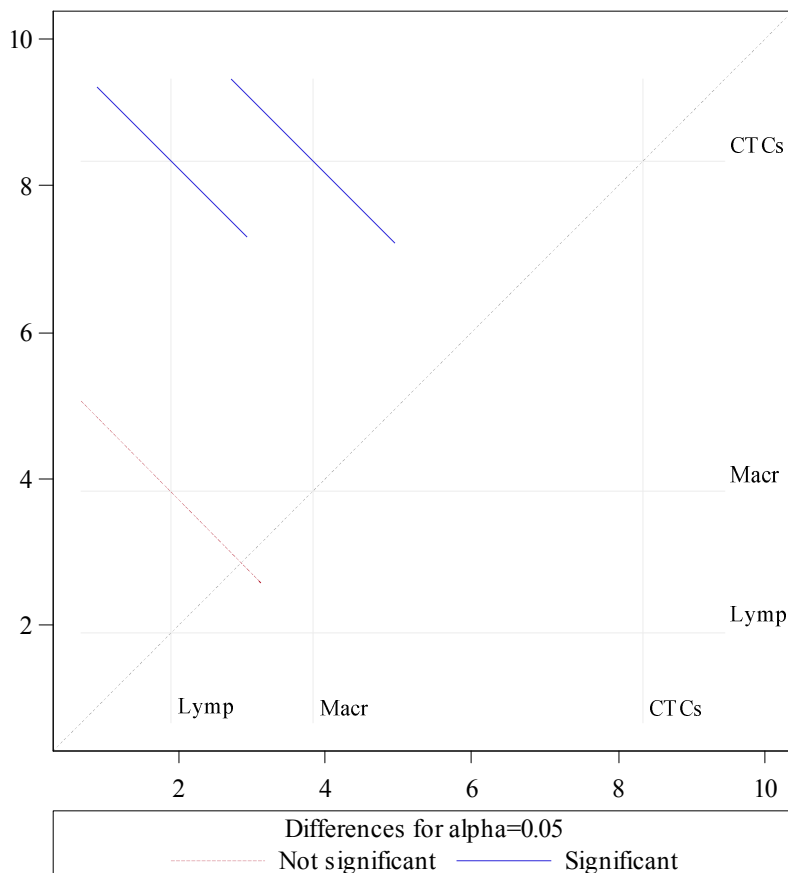

| type         | acratio<br>LSMEAN | Standard<br>Error | Pr >  t | LSMEAN<br>Number |
|--------------|-------------------|-------------------|---------|------------------|
| <b>CTCs</b>  | 2.86059874        | 0.22666345        | <.0001  | 1                |
| <b>Lymph</b> | 1.20058793        | 0.29841630        | 0.0001  | 2                |
| <b>Macr</b>  | 4.24574665        | 0.34081544        | <.0001  | 3                |

| Least Squares Means for effect type<br>Pr >  t  for H0: LSMean(i)=LSMean(j) |        |        |        |
|-----------------------------------------------------------------------------|--------|--------|--------|
| Dependent Variable: acratio                                                 |        |        |        |
| i/j                                                                         | 1      | 2      | 3      |
| 1                                                                           |        | <.0001 | 0.0010 |
| 2                                                                           | <.0001 |        | <.0001 |
| 3                                                                           | 0.0010 | <.0001 |        |

*The GLM Procedure*  
*Least Squares Means*

pt=17AA1313

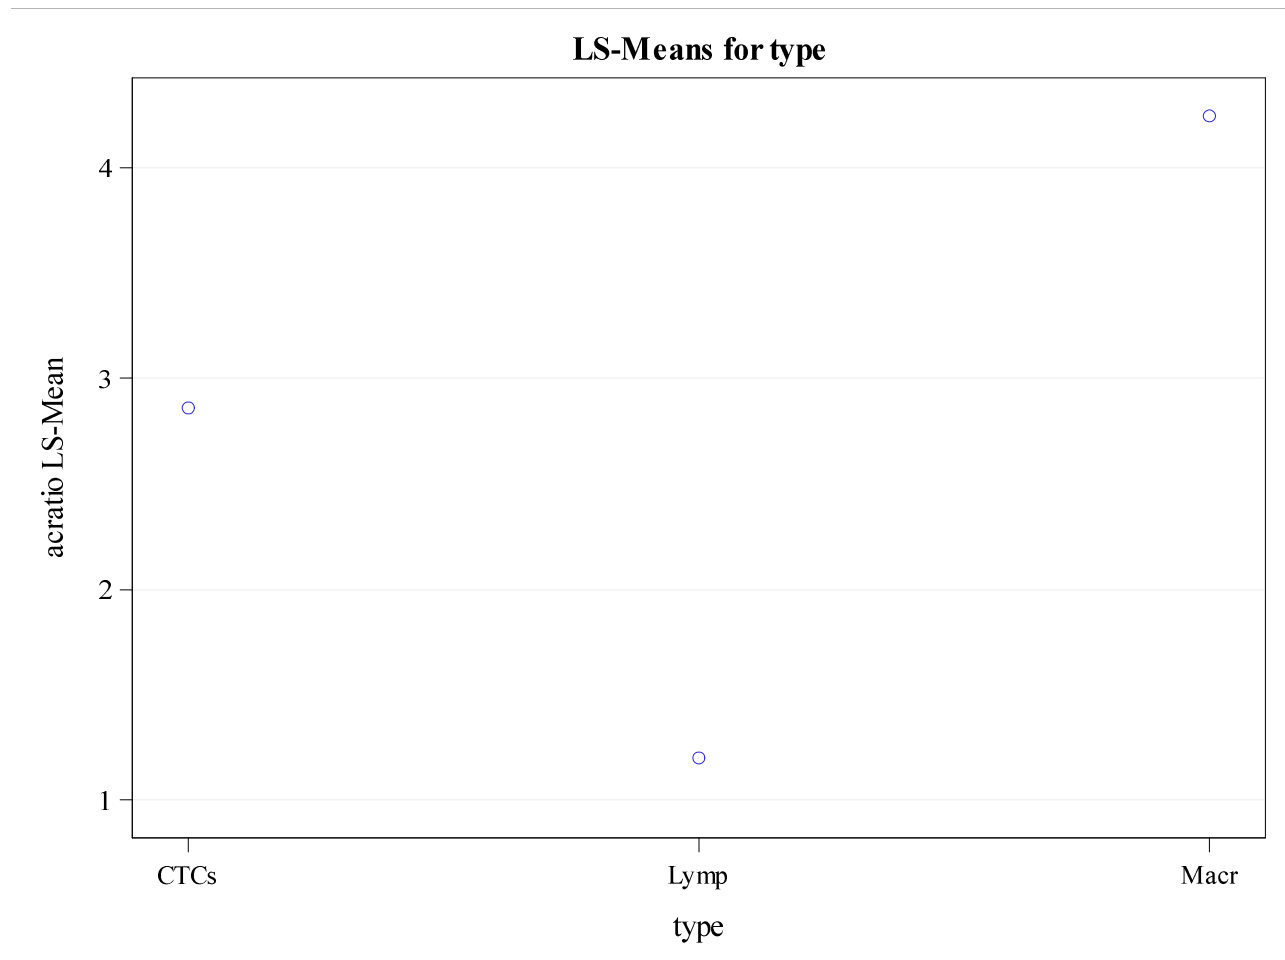

*The GLM Procedure*  
*Least Squares Means*

pt=17AA1313

acratio Comparisons for type

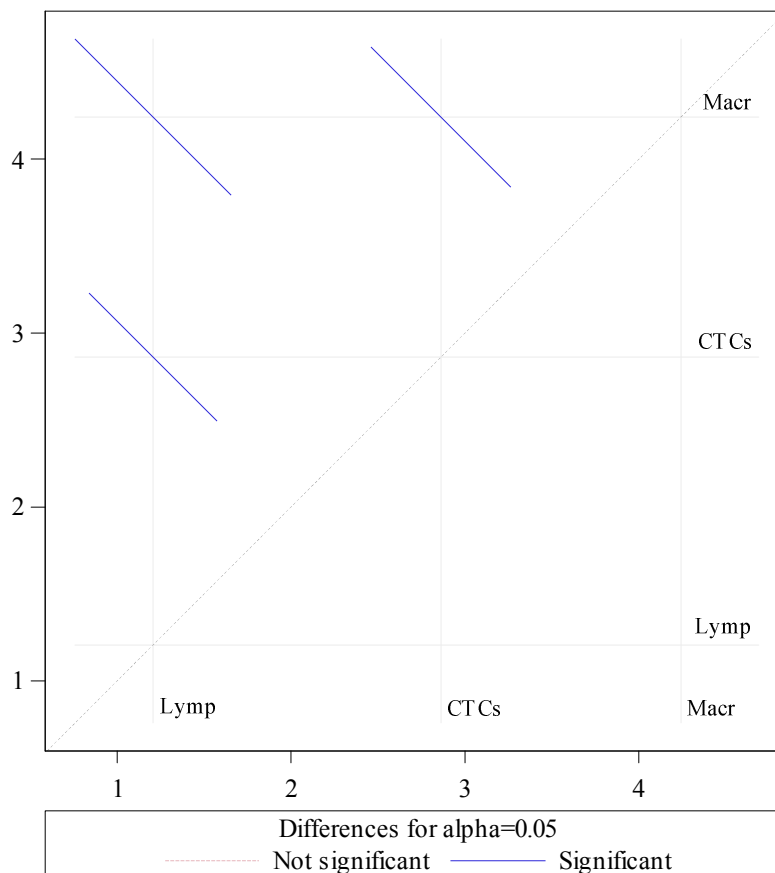

| type         | AvIntallsignals<br>LSMEAN | Standard<br>Error | Pr >  t | LSMEAN<br>Number |
|--------------|---------------------------|-------------------|---------|------------------|
| <b>CTCs</b>  | 9591.2456                 | 545.3876          | <.0001  | 1                |
| <b>Lymph</b> | 20821.2834                | 718.0362          | <.0001  | 2                |
| <b>Macr</b>  | 11012.3626                | 820.0551          | <.0001  | 3                |

| Least Squares Means for effect type<br>Pr >  t  for H0: LSMean(i)=LSMean(j) |        |        |        |
|-----------------------------------------------------------------------------|--------|--------|--------|
| Dependent Variable: AvIntallsignals                                         |        |        |        |
| i/j                                                                         | 1      | 2      | 3      |
| 1                                                                           |        | <.0001 | 0.1521 |
| 2                                                                           | <.0001 |        | <.0001 |
| 3                                                                           | 0.1521 | <.0001 |        |

*The GLM Procedure*  
*Least Squares Means*

pt=17AA1313

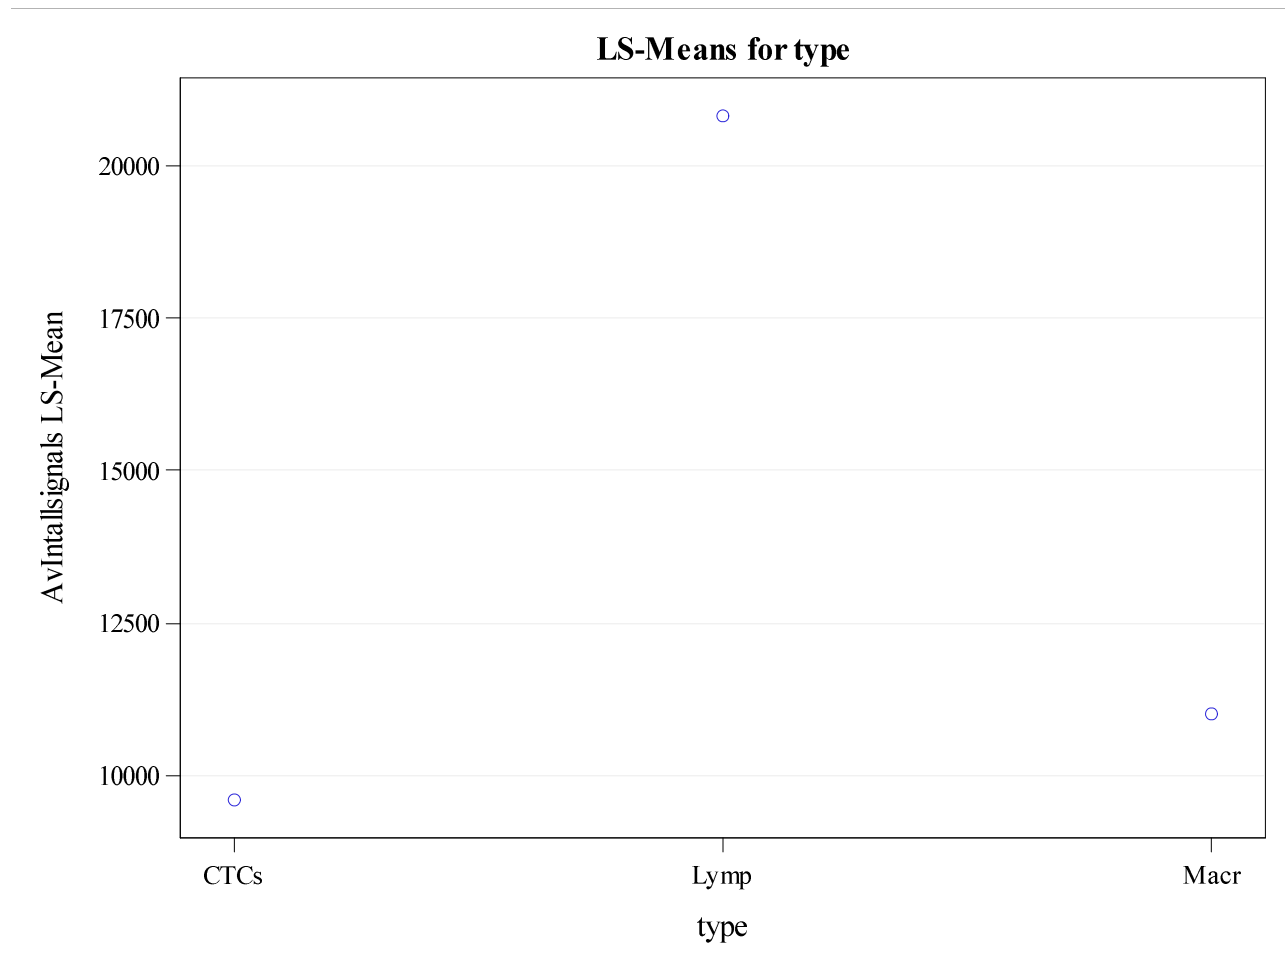

**The GLM Procedure**  
**Least Squares Means**

pt=17AA1313

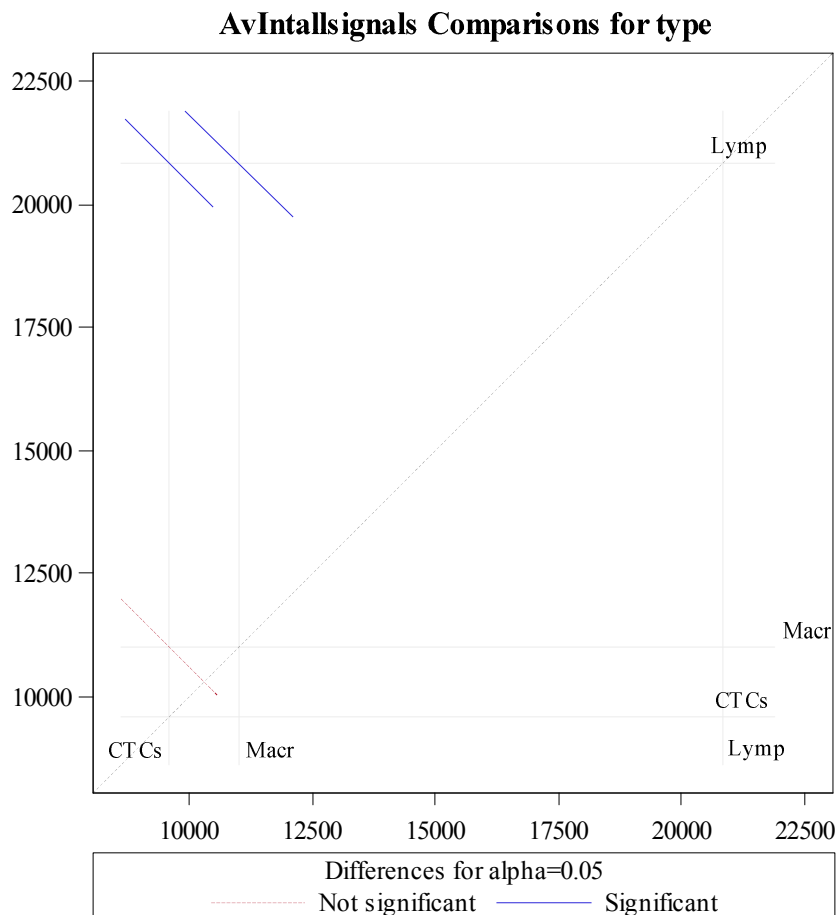

| type        | Totalintensity<br>LSMEAN | Standard<br>Error | Pr >  t | LSMEAN<br>Number |
|-------------|--------------------------|-------------------|---------|------------------|
| <b>CTCs</b> | 730303.596               | 35623.670         | <.0001  | 1                |
| <b>Lymp</b> | 404073.000               | 46900.741         | <.0001  | 2                |
| <b>Macr</b> | 339414.087               | 53564.421         | <.0001  | 3                |

| Least Squares Means for effect type<br>Pr >  t  for H0: LSMean(i)=LSMean(j) |        |        |        |
|-----------------------------------------------------------------------------|--------|--------|--------|
| Dependent Variable: Totalintensity                                          |        |        |        |
| i/j                                                                         | 1      | 2      | 3      |
| 1                                                                           |        | <.0001 | <.0001 |
| 2                                                                           | <.0001 |        | 0.3659 |
| 3                                                                           | <.0001 | 0.3659 |        |

*The GLM Procedure*  
*Least Squares Means*

pt=17AA1313

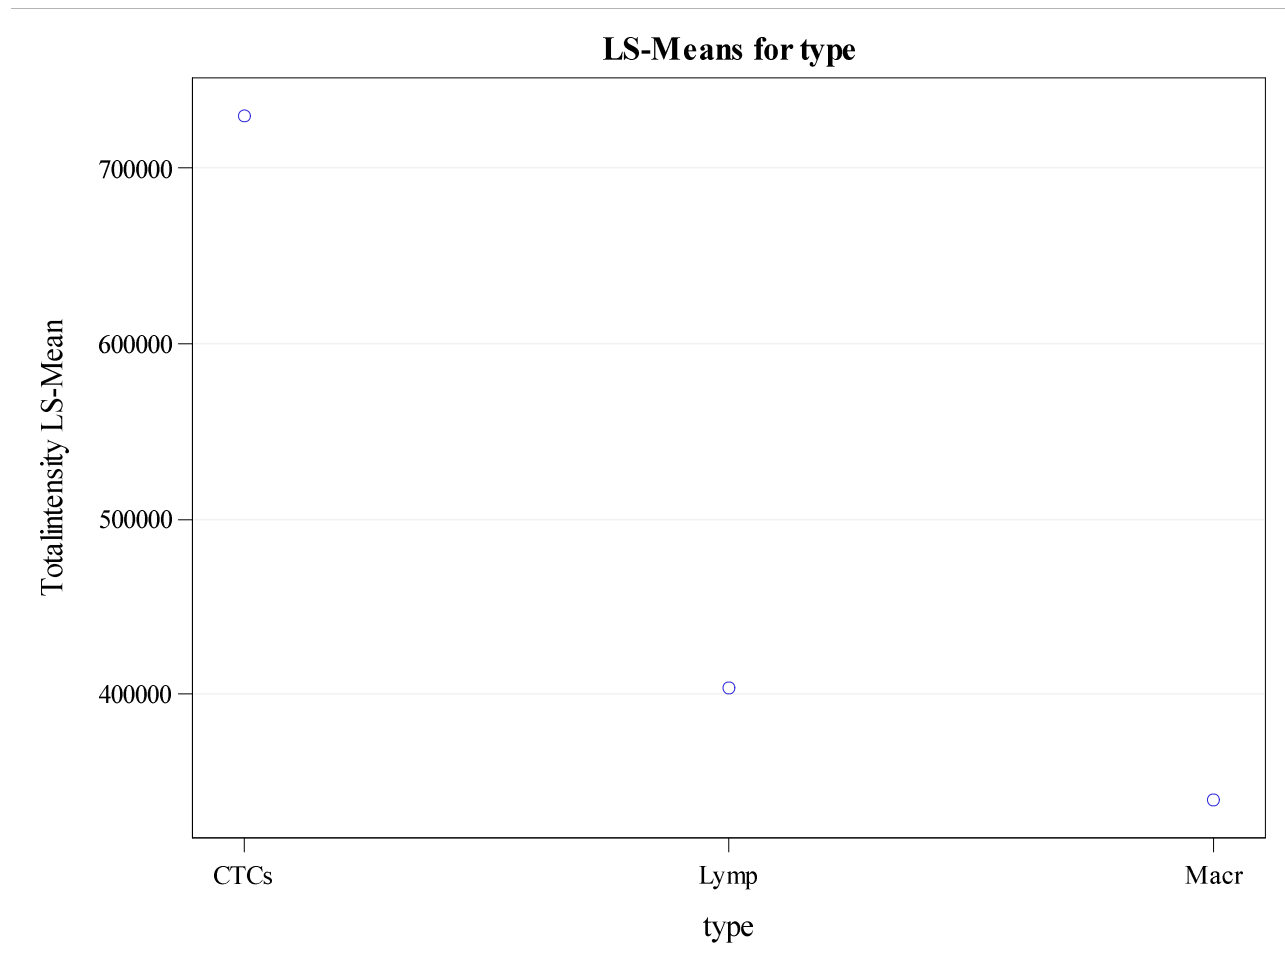

***The GLM Procedure***  
***Least Squares Means***

**pt=17AA1313**

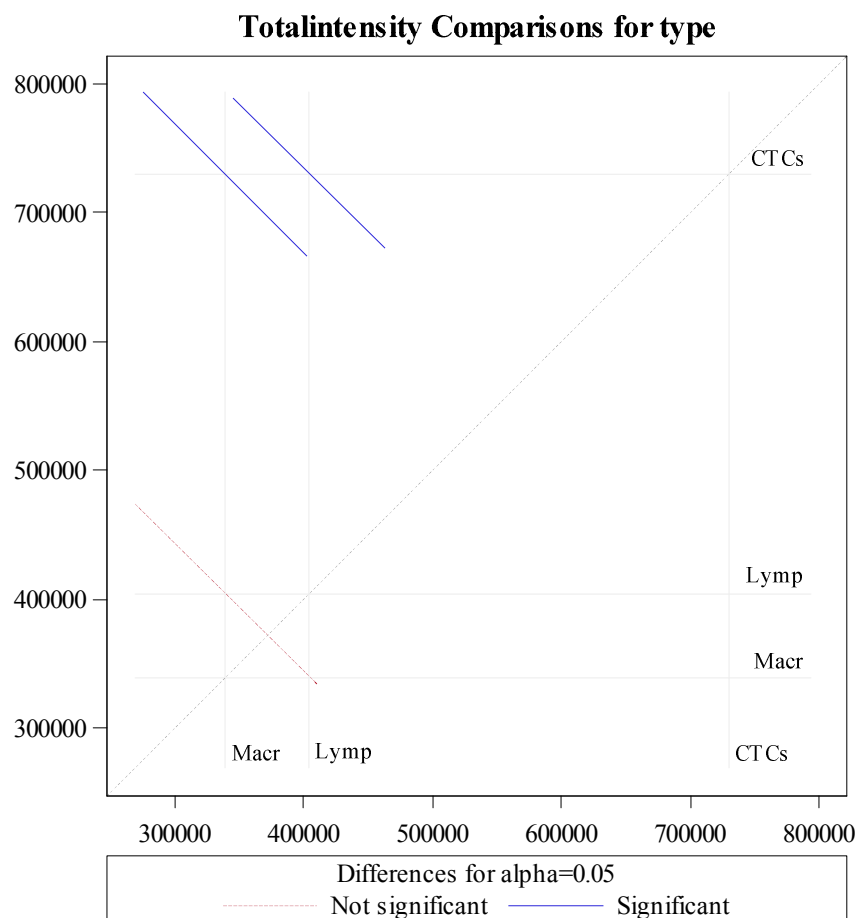

| type         | Nuclearvolume<br>LSMEAN | Standard<br>Error | Pr >  t | LSMEAN<br>Number |
|--------------|-------------------------|-------------------|---------|------------------|
| <b>CTCs</b>  | 772099.269              | 28826.907         | <.0001  | 1                |
| <b>Lymph</b> | 139915.400              | 37952.387         | 0.0004  | 2                |
| <b>Macr</b>  | 491442.043              | 43344.680         | <.0001  | 3                |

| Least Squares Means for effect type<br>Pr >  t  for H0: LSMean(i)=LSMean(j) |        |        |        |
|-----------------------------------------------------------------------------|--------|--------|--------|
| Dependent Variable: Nuclearvolume                                           |        |        |        |
| i/j                                                                         | 1      | 2      | 3      |
| 1                                                                           |        | <.0001 | <.0001 |
| 2                                                                           | <.0001 |        | <.0001 |
| 3                                                                           | <.0001 | <.0001 |        |



*The GLM Procedure*  
*Least Squares Means*

pt=17AA1313

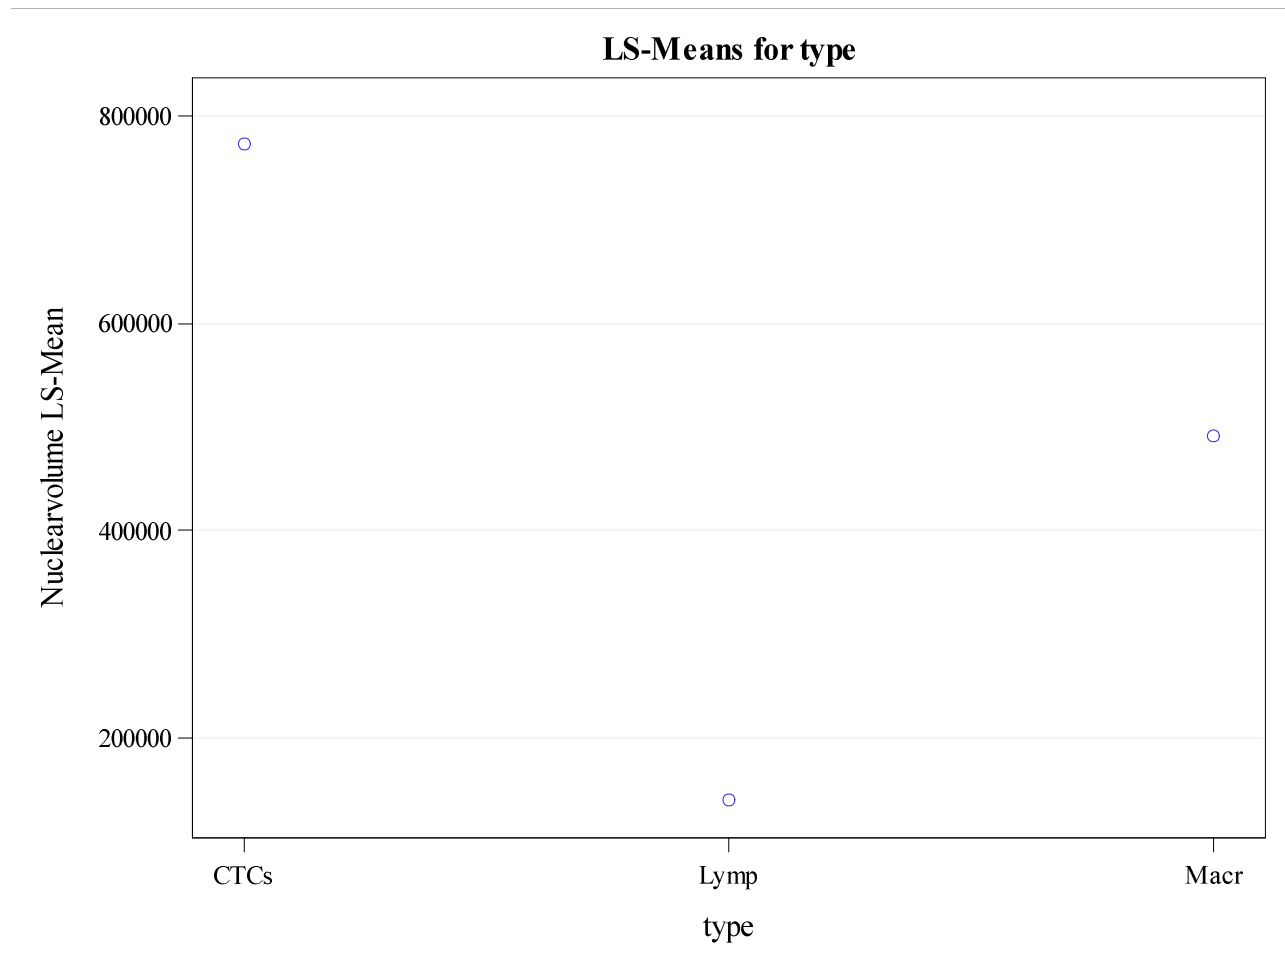

**The GLM Procedure**  
**Least Squares Means**

pt=17AA1313

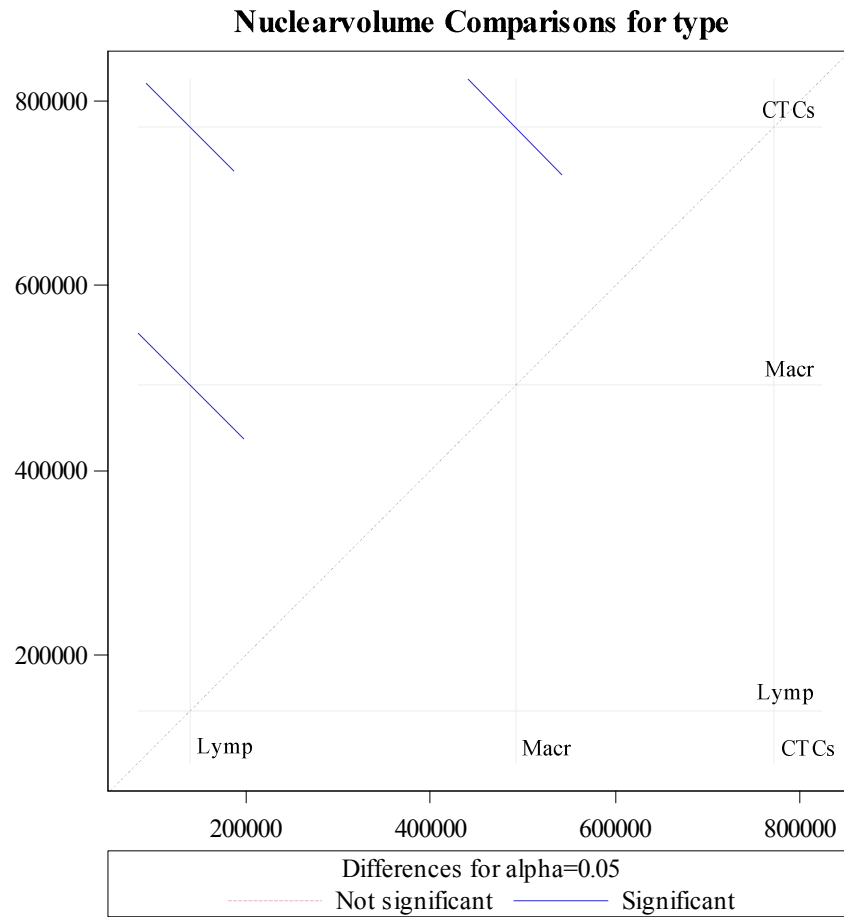

| type        | telomereperkvol<br>LSMEAN | Standard<br>Error | Pr >  t | LSMEAN<br>Number |
|-------------|---------------------------|-------------------|---------|------------------|
| <b>CTCs</b> | 0.10110829                | 0.00469452        | <.0001  | 1                |
| <b>Lymp</b> | 0.14185622                | 0.00618063        | <.0001  | 2                |
| <b>Macr</b> | 0.06863290                | 0.00705877        | <.0001  | 3                |

| Least Squares Means for effect type<br>Pr >  t  for H0: LSMean(i)=LSMean(j) |        |        |        |
|-----------------------------------------------------------------------------|--------|--------|--------|
| Dependent Variable: telomereperkvol                                         |        |        |        |
| i/j                                                                         | 1      | 2      | 3      |
| 1                                                                           |        | <.0001 | 0.0002 |
| 2                                                                           | <.0001 |        | <.0001 |
| 3                                                                           | 0.0002 | <.0001 |        |

*The GLM Procedure*  
*Least Squares Means*

pt=17AA1313

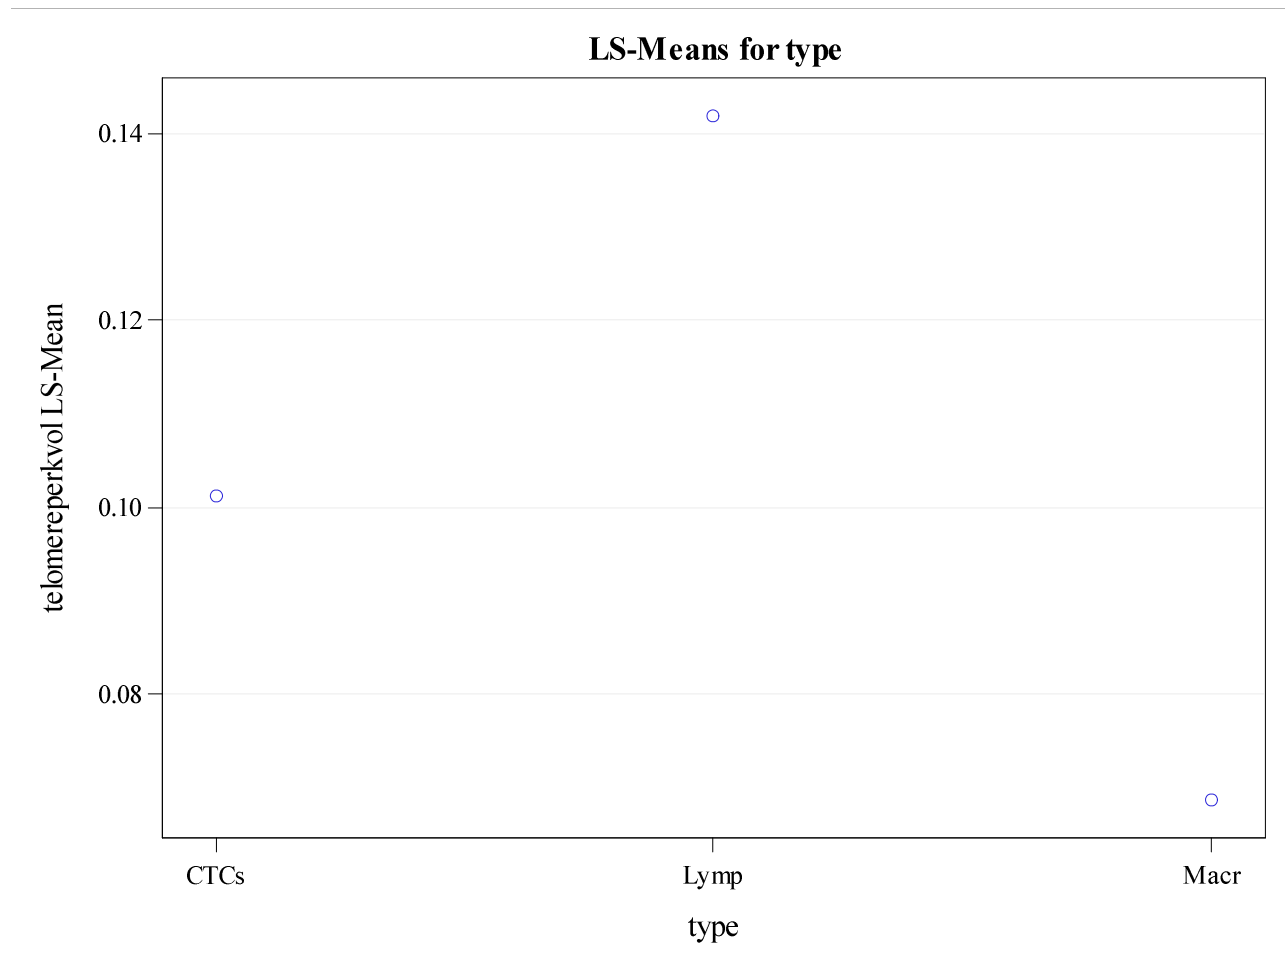

*The GLM Procedure*  
*Least Squares Means*

pt=17AA1313

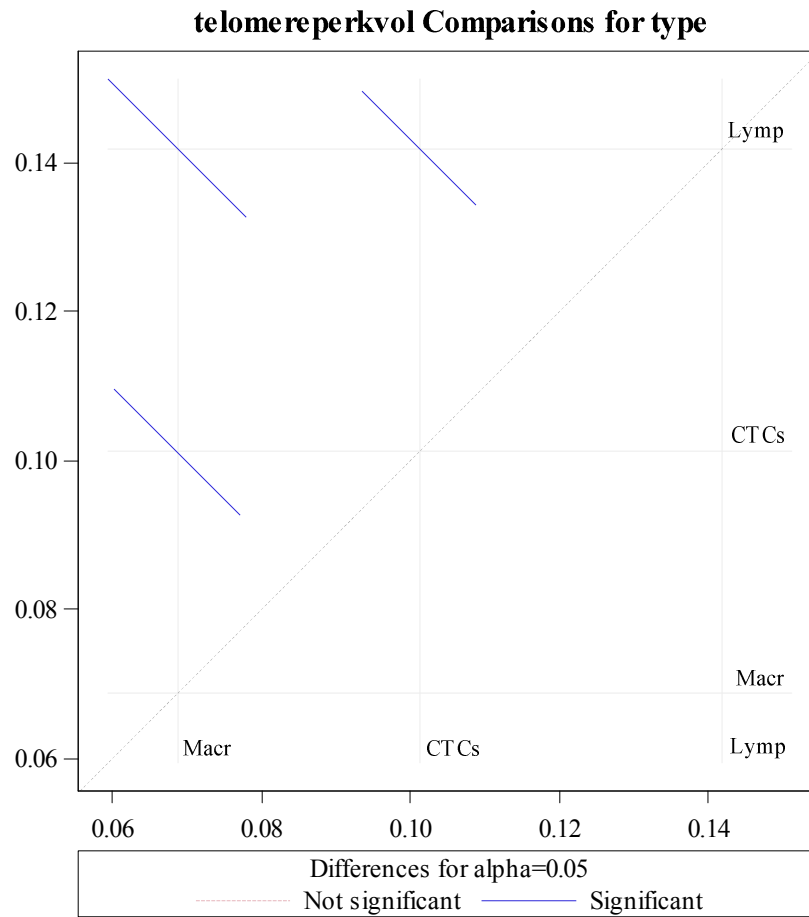

**Note:** To ensure overall protection level, only probabilities associated with pre-planned comparisons should be used.
