# Supplementary material for: Telomere-Associated Changes in Nuclear Architecture of Cancer-Associated Macrophage-like Cells in Liquid Biopsies from Melanoma Patients
Source: MDPI journal article supplement (doi:10.3390/biomedicines10102391), 2022-09-25
Supplement: s1 [file s1]

16AB0304 – Patient 1

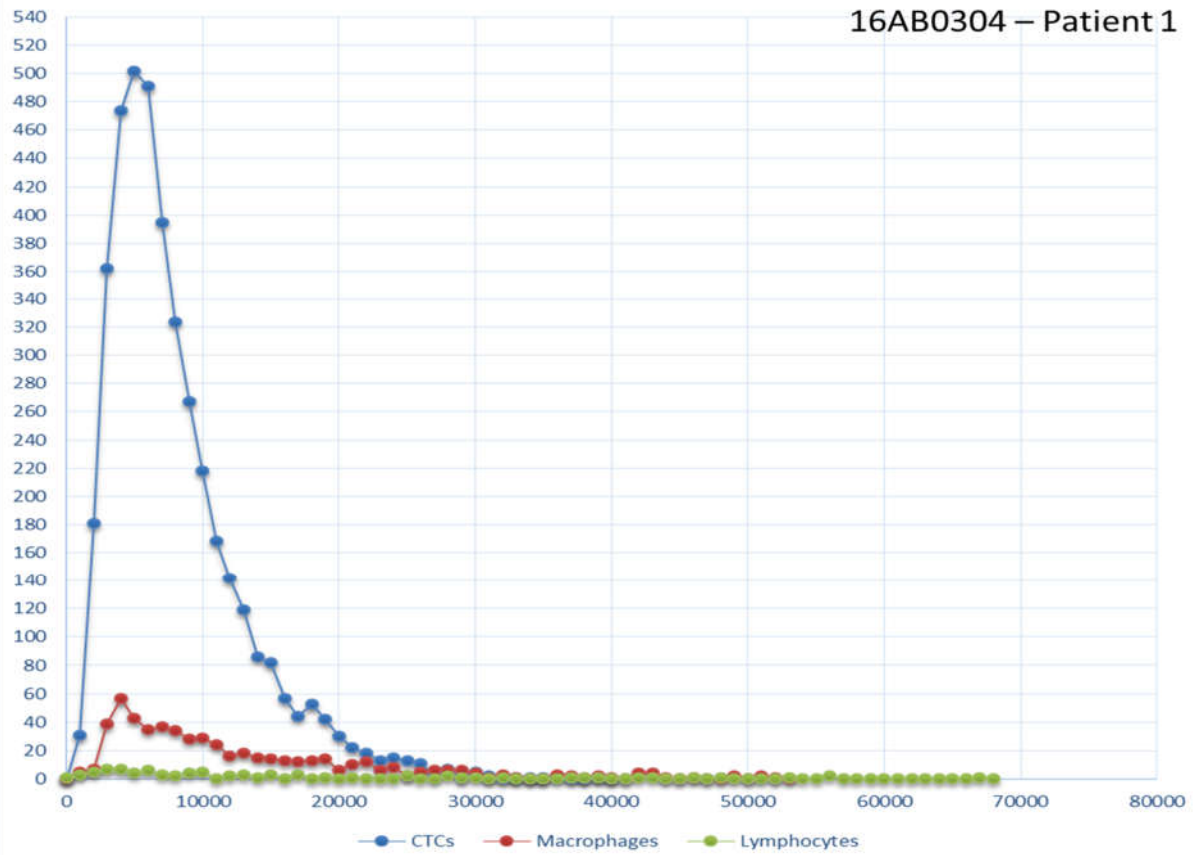

17AA1313 – Patient 1.1

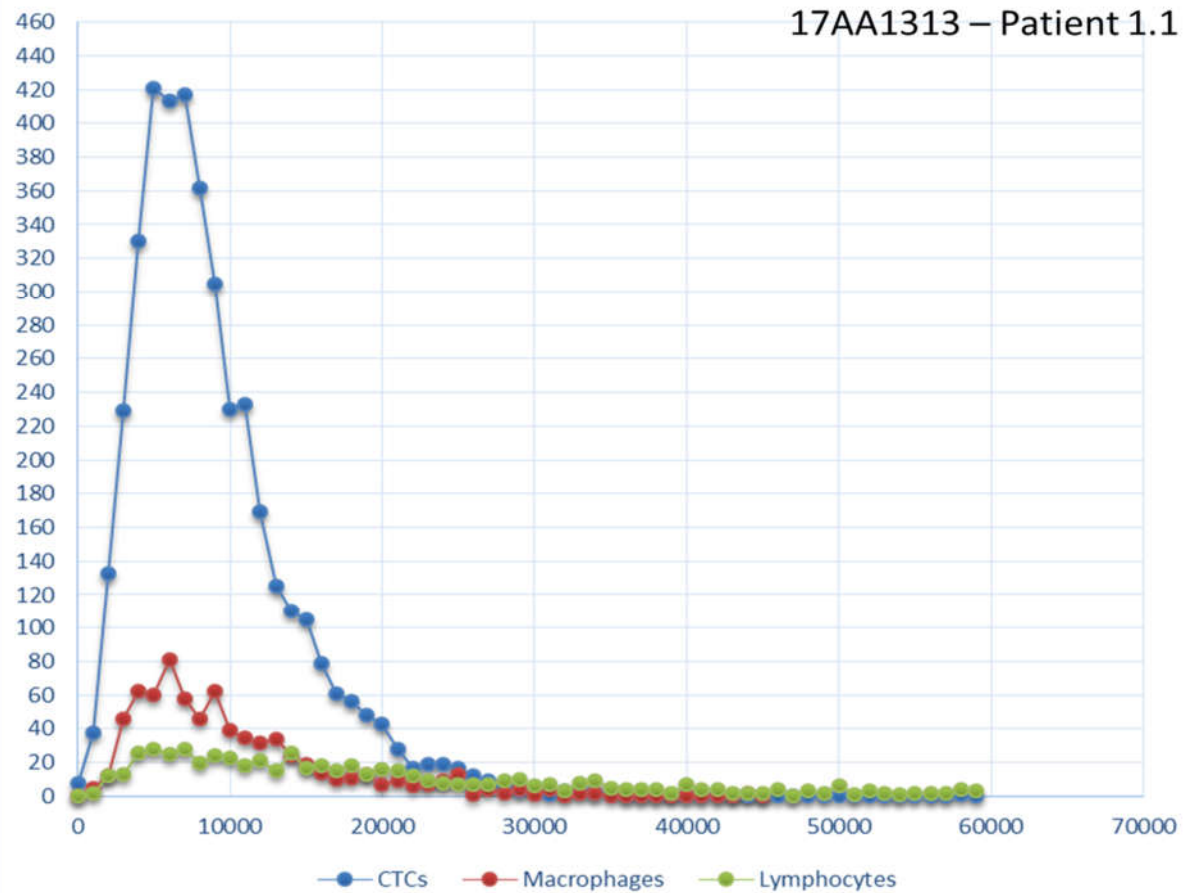

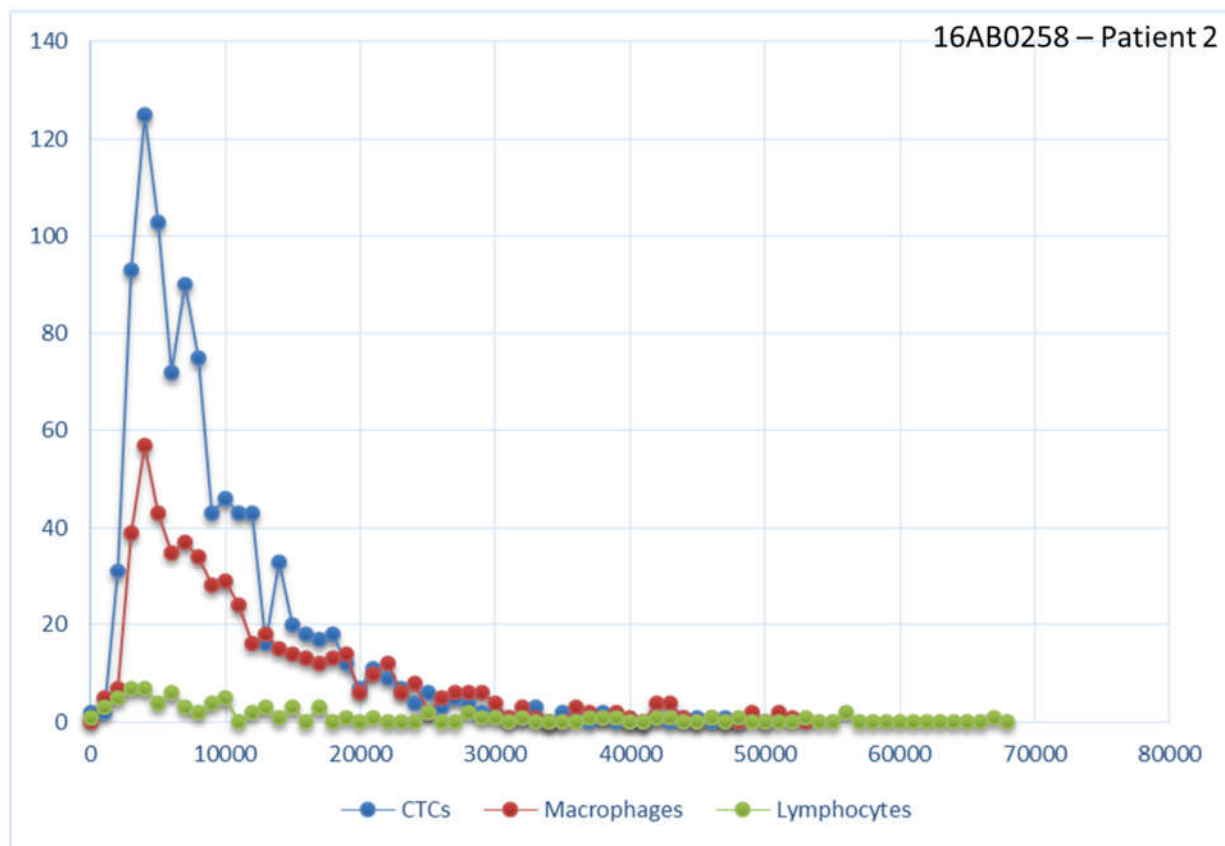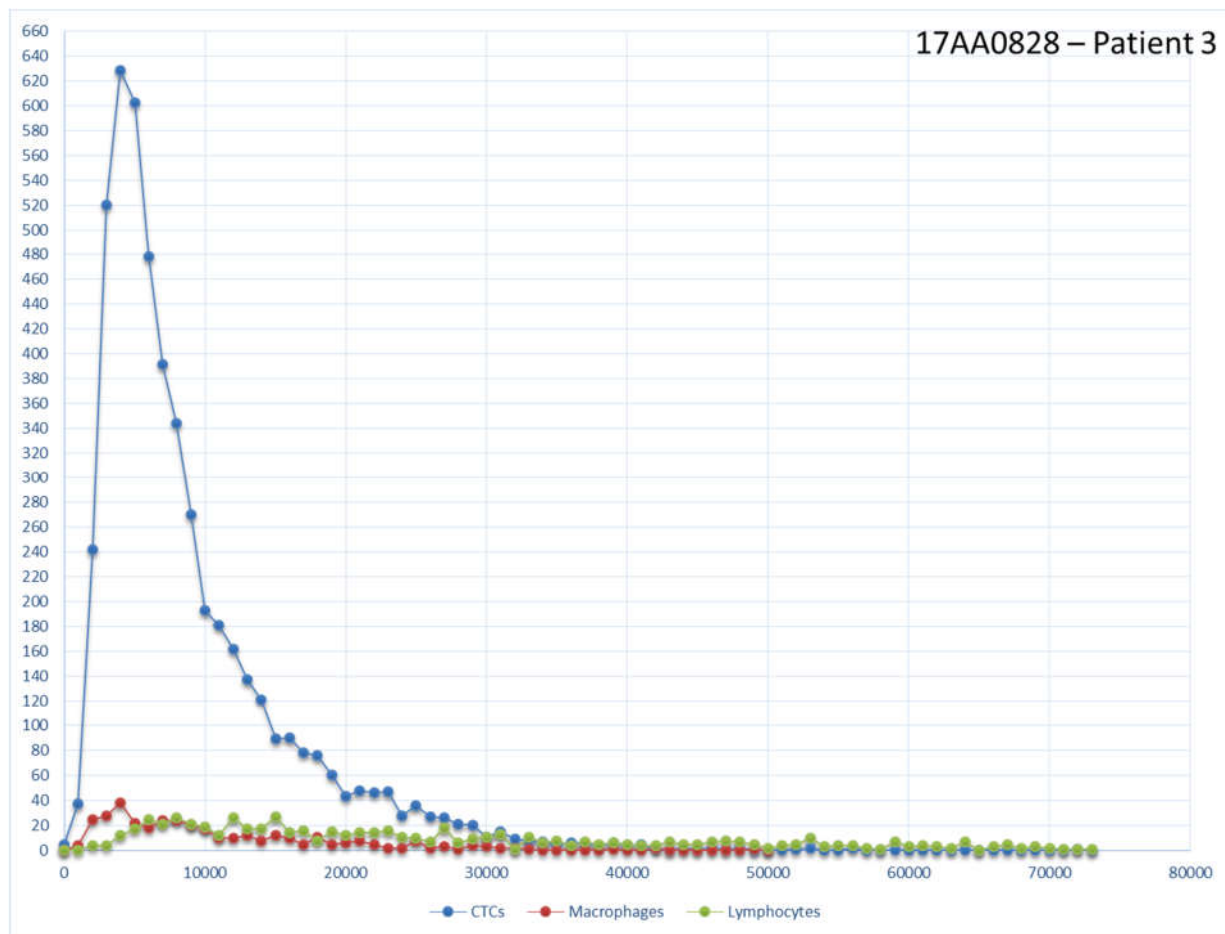

16AA8528 – Patient 4

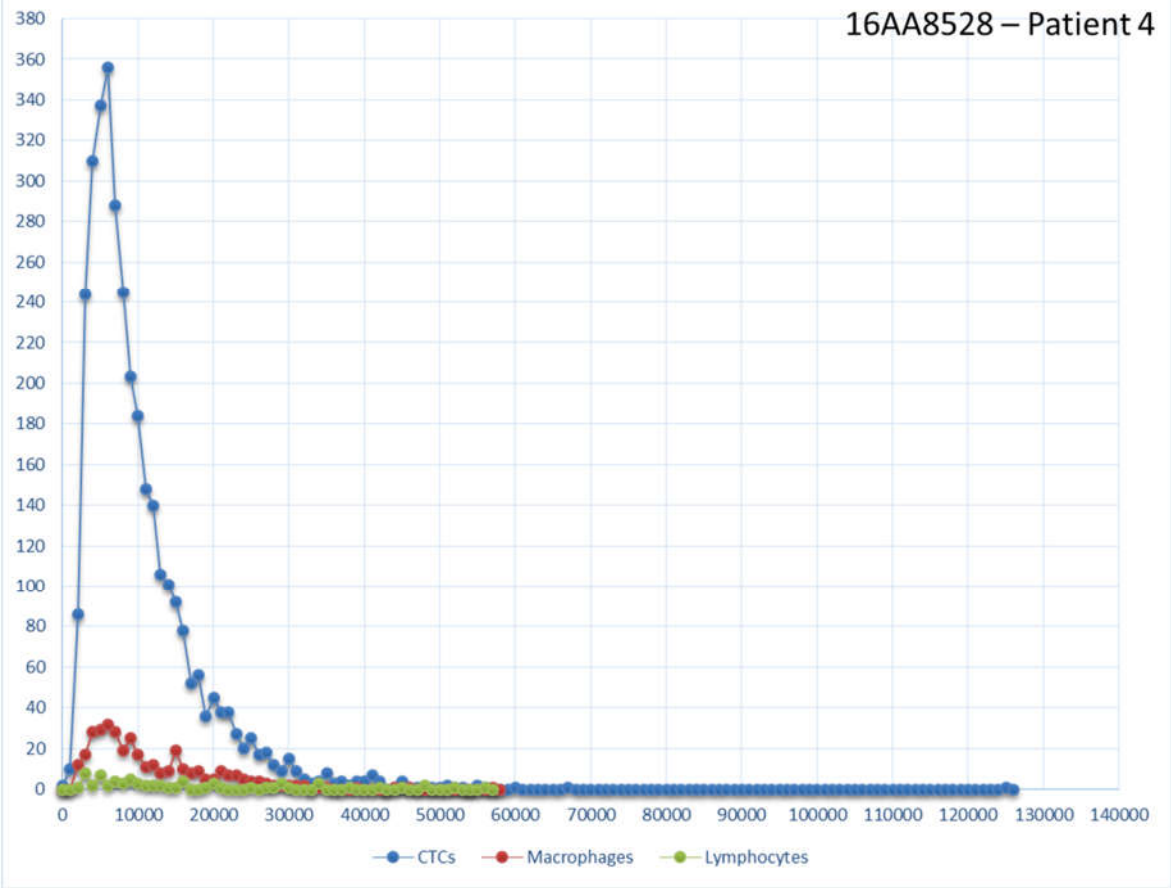

16AA7280 – Patient 5

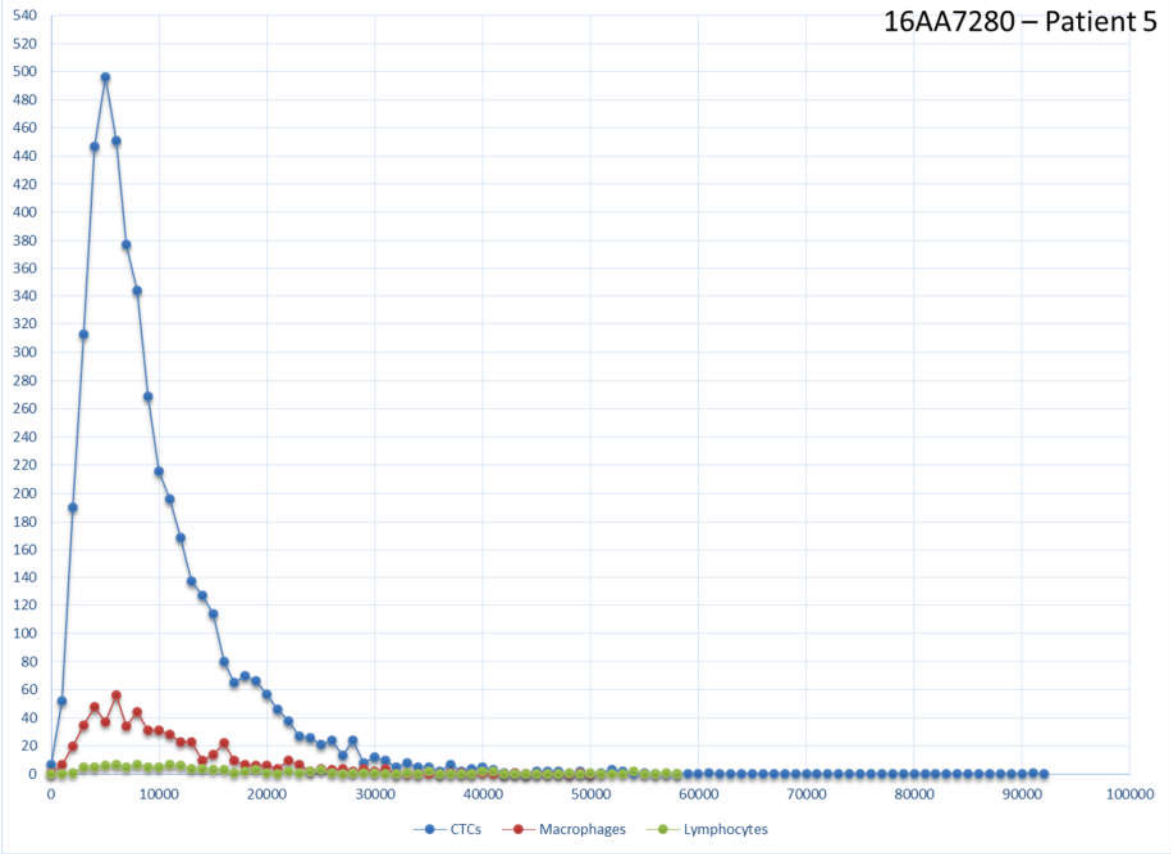

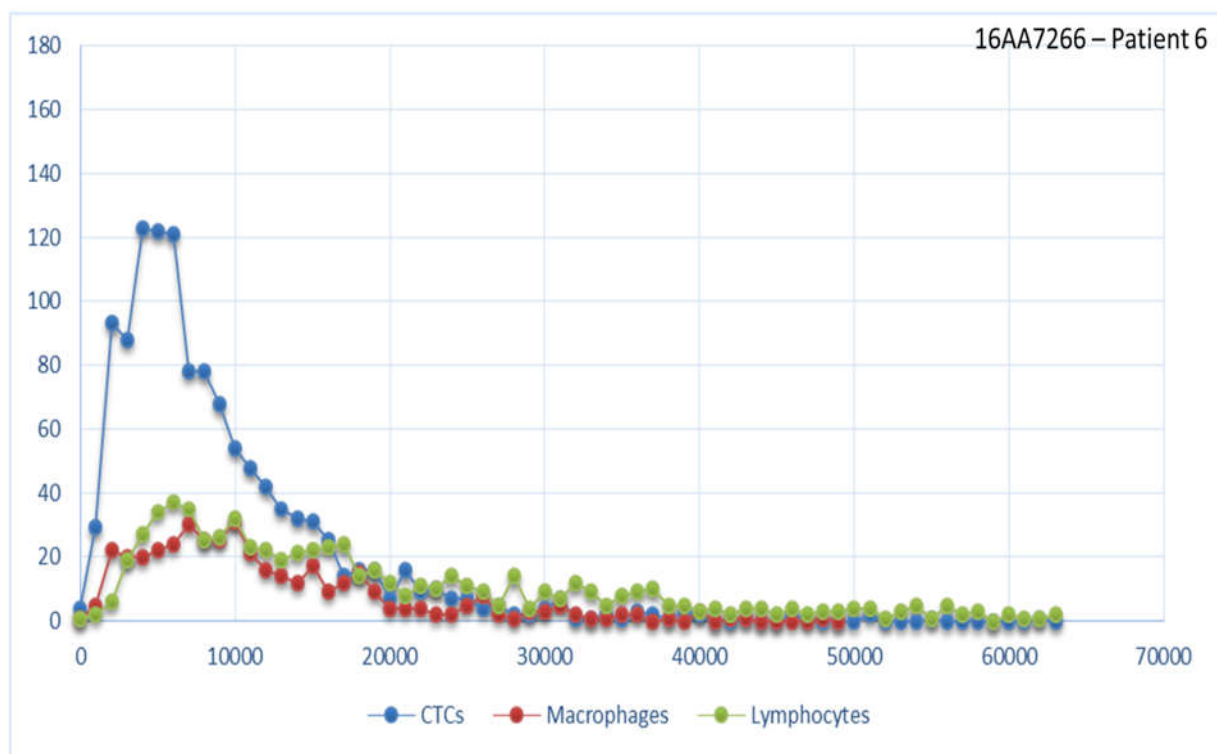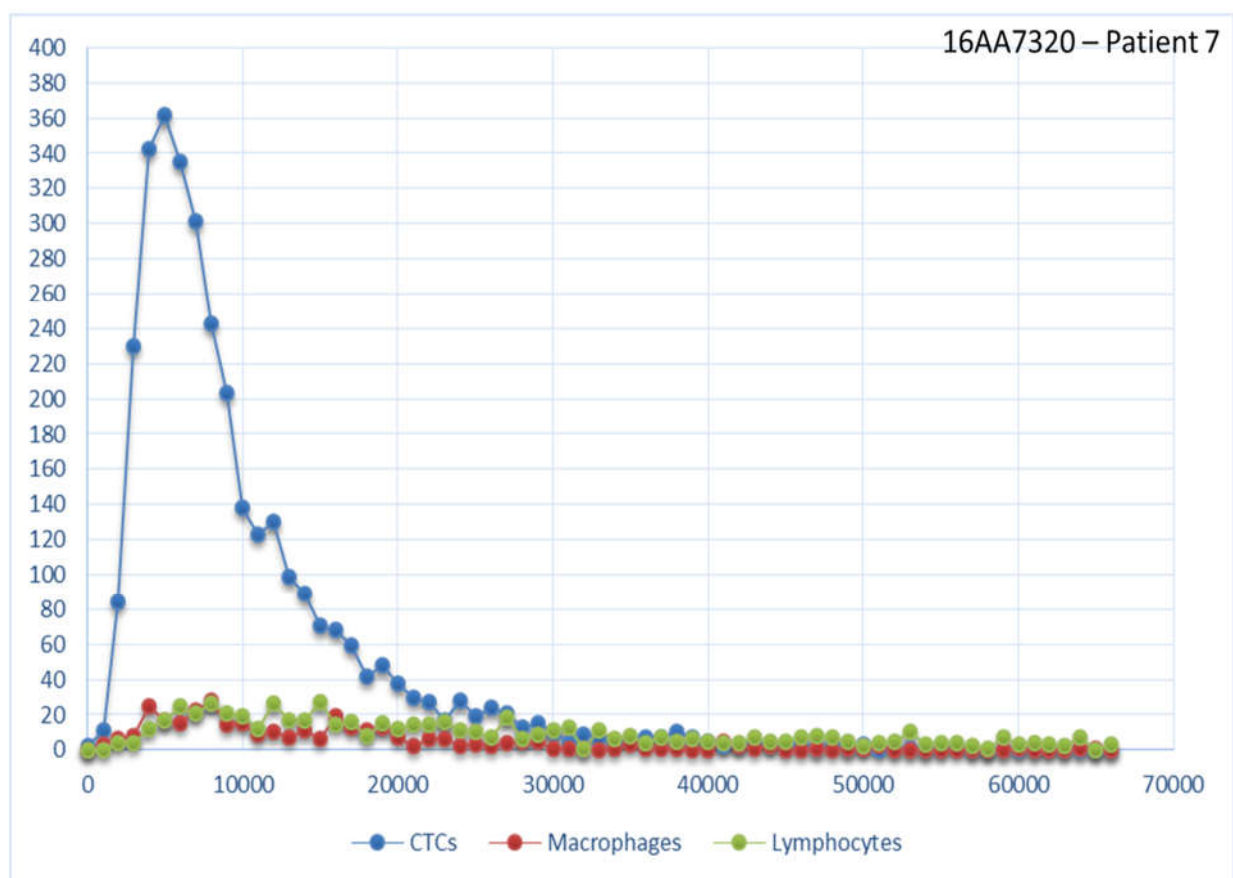

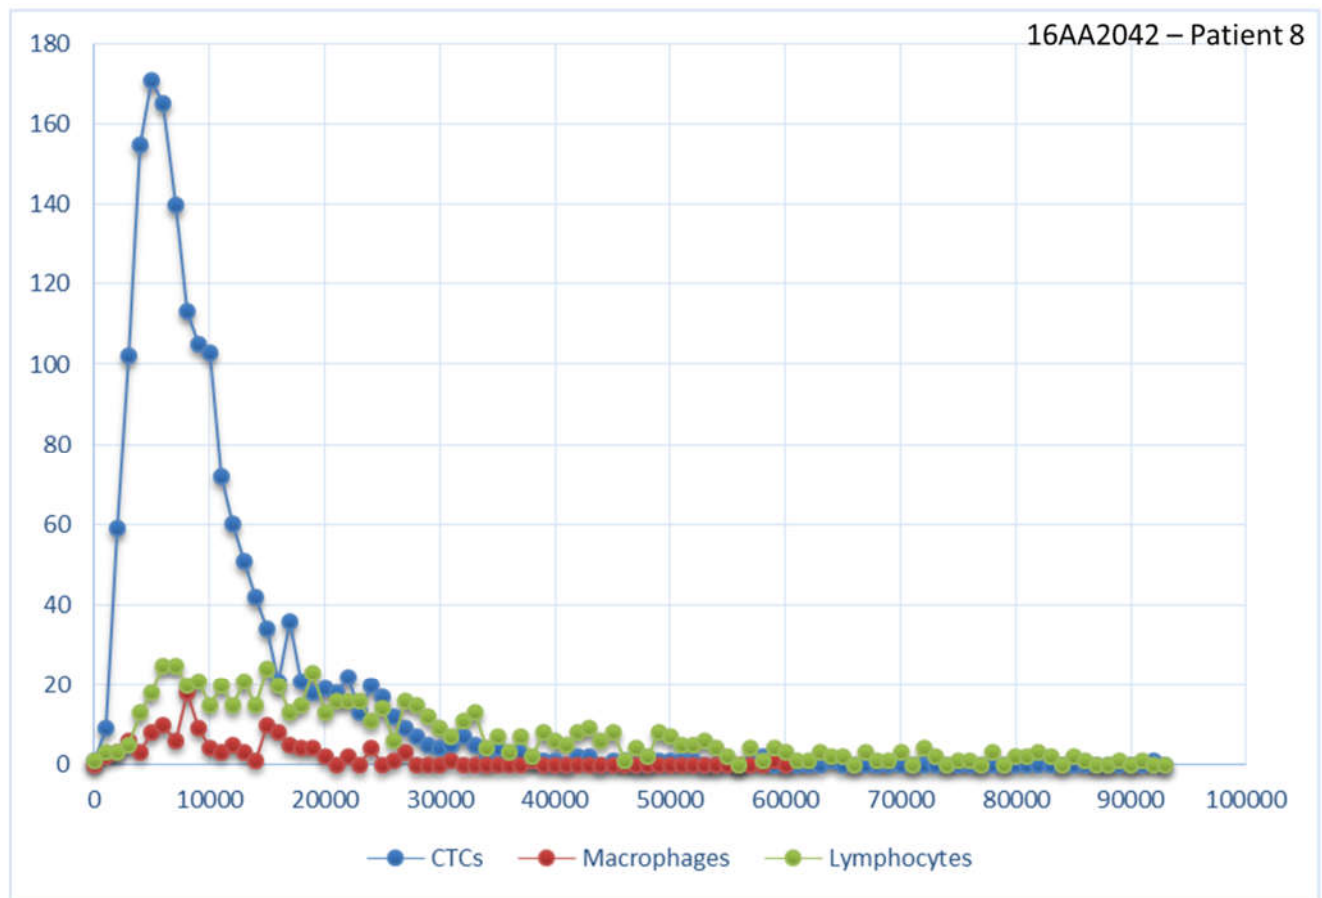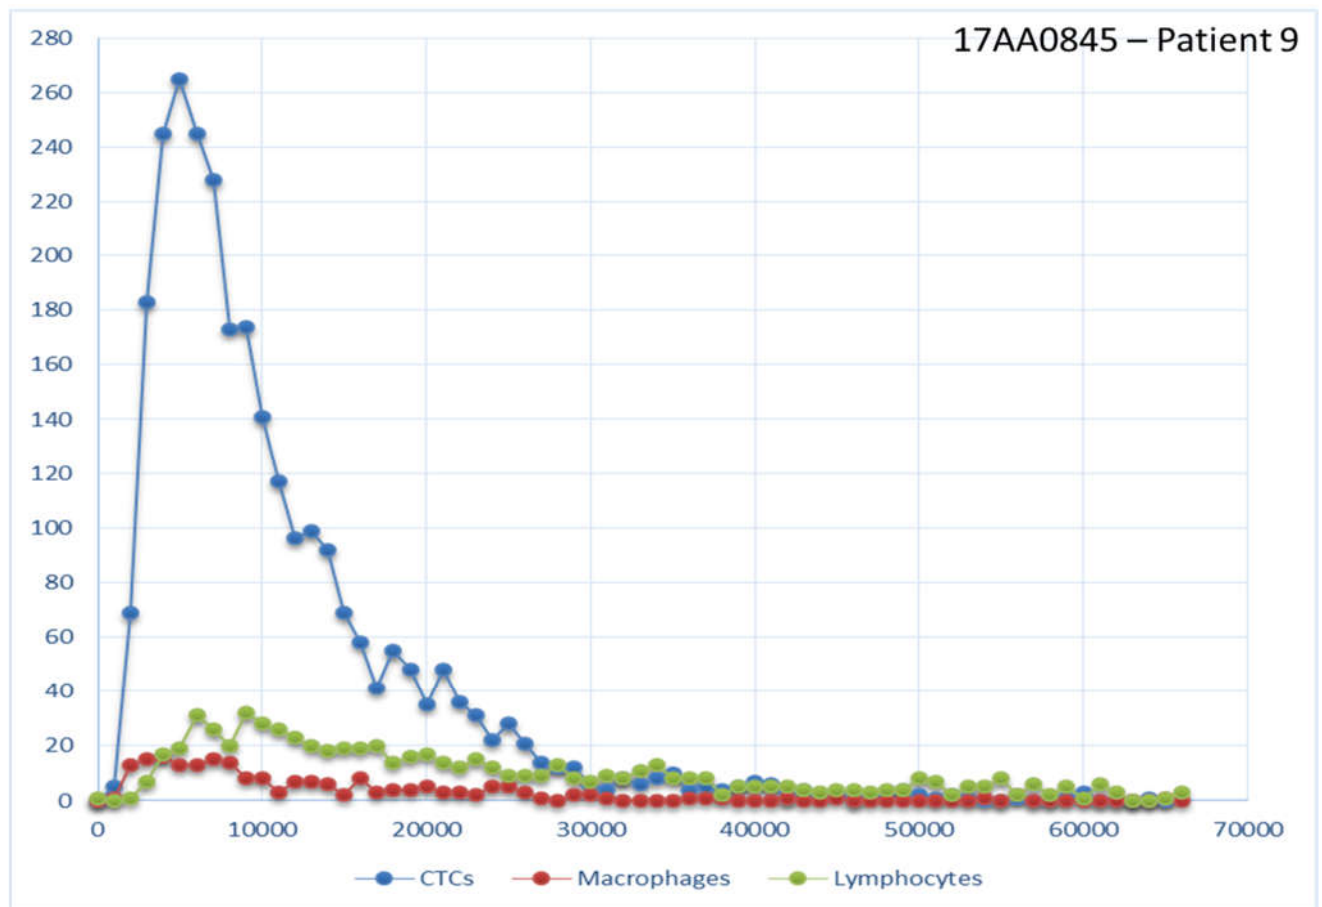

**Supplementary Figure S1:** Representative figures of the CTCs, CAMLs and lymphocytes 3D telomere profile all patients assigned to profile 1 (Patients 3, 6, 7, 8 and 9) and profile 2 (Patients 1 and 1.1, 2, 4 and 5). In each graph, the telomere length is shown in arbitrary units of fluorescence (AU). The CTC, CAMLs (macrophages) and Lymphocytes are demarked with colors.
