# Supplementary material for: Telomere-Associated Changes in Nuclear Architecture of Cancer-Associated Macrophage-like Cells in Liquid Biopsies from Melanoma Patients
Source: MDPI journal article supplement (doi:10.3390/biomedicines10102391), 2022-09-25
Supplement: s1 [file s1]

| Patients      | Sampling date | Melanoma                         | BRAF       | Age | Stage  | Number of metastatic sites                                          | LDH<br>(240-480) | Systemic treatment                                           | Start Date<br>Stop date           | Best response    | Date of best<br>response | Date of progression | Death        | Last news    |
|---------------|---------------|----------------------------------|------------|-----|--------|---------------------------------------------------------------------|------------------|--------------------------------------------------------------|-----------------------------------|------------------|--------------------------|---------------------|--------------|--------------|
| VS-1-018-ET3  | 1 Feb 2017    | Mucosal, nasal cavity            | WT         | 41  | IV M1c | skin, lymph node, bone, lung, liver,<br>kidney, digestive           | 432              | Temozolomid                                                  | 30/Dec/2016<br>and<br>22/Feb/2017 | Progression      | 1 Feb 2017               | 1 Feb 2017          | 26 July 2017 | NA           |
| TM-1-019-M1   | 8 Feb 2017    | SSM, Calf                        | BRAF V600E | 66  | IV M1c | skin, bone, brain                                                   | 2235             | Dabrafenib +<br>Trametinib                                   | 16/Jan/2017<br>and<br>14/Apr/2017 | Progression      | 14 Abril 2017            | 14 April 2017       | 24 May 2017  | NA           |
| LM-1-039-CL2  | 17 May 2017   | Unclassifiable, feet             | WT         | 73  | IV M1c | skin, lymph node, bone, liver                                       | 843              | No treatment                                                 | 17/May/2017<br>and<br>05/Jul/2017 | NA               | NA                       | NA                  | 5 July 2017  | NA           |
| BJ-1-071-ET4  | 10 May 2017   | Nodular, trunk                   | WT         | 88  | IV M1c | skin, lymph node, bone                                              | 573              | Pembrolizumab                                                | 02/Mar/2017<br>and<br>04/May/2017 | Progression      | 10 March 2017            | 10 May 2017         | 3 Sep 2017   | NA           |
| DA-1-075-ET2  | 28 Feb 2017   | SSM, trunk                       | BRAF V600E | 73  | IV M1c | lymph node, liver, brain                                            | 581              | Clinical Trial<br>Vemurafenib +<br>Cobimetinib               | 05/Dec/2016<br>and<br>28/Mar/2017 | Partial response | 28 Feb 2017              | 28 May 2017         | 1 Sept 2017  | NA           |
| VS-1-018-M1-3 | 7 June 2017   | Mucosal, nasal cavity            | WT         | 41  | IV M1c | skin, lymph node, bone, lung, liver,<br>digestive, kidney, pancreas | 481              | Cobimetinib                                                  | 22/Apr/2017<br>and<br>26/Jul/2017 | Progression      | 10 March 2017            | 10 May 2017         | 26 July 2016 | NA           |
| GF-1-080_ET1  | 16 March 2017 | SSM, abdominal wall              | BRAF V600E | 75  | IV M1a | lymph node                                                          | 378              | Clinical Trial<br>Pembrolizumab<br>/ placebo                 | 21/Dec/2016<br>and<br>27/Mar/2017 | Progression      | 15 March 2017            | 15 March2017        | NA           | 20 June 2019 |
| LM-1-081_ET1  | 7 March 2017  | Unclassifiable<br>Unknown origin | WT         | 73  | IV M1c | skin, lymph node, bone, muscle,<br>adrenal                          | 545              | No treatment                                                 | 13/Feb/2017<br>and<br>05/May/2017 | Progression      | 7 March 2017             | 7 March 2017        | 17 Oct 2018  | NA           |
| AR-1-092_ET1  | 15 March 2017 | Unclassifiable<br>Unknown origin | WT         | 65  | IV M1c | lymph node, digestive, pancreas,<br>muscle                          | 772              | Clinical Trial<br>CheckMate 511<br>Ipilimumab +<br>Nivolumab | 22/Mar/2017<br>and<br>24/Jan/2018 | Stable           | 15 June 2017             | 29 Nov 2017         | 2 Feb 2019   | NA           |
| KJ-1-084_ET1  | 19 March 2017 | Unclassifiable, face             | BRAF V600E | 39  | IV M1b | lung                                                                | 431              | Pembrolizumab                                                | 13/Feb/2017 and<br>27/Dec/2017    | Stable           | 19 May2017               | 15 Sept 2017        | 13 Dec 2018  | NA           |

Supplementary Table S1: Clinical information of all patients included in the study
